# Supplementary material for: RhoJ Regulates Melanoma Chemoresistance by Suppressing Pathways That Sense DNA Damage
Source: Oxford University Press journal article supplement (doi:10.1158/0008-5472.can-12-0775), 2012-09-13
Supplement: 00085472can120775-sup-stab_1_xls_9103k.xls [file 00085472can120775-sup-stab_1_xls_9103k.xls]

## Sheet: screen dataset
Gene Symbol	mean carrier	SD carrier	mean DTIC	SD DTIC	Ratio DTIC/ carrier	Z-score	Locus ID	Accession	Unigene	Gene Name	Aliases	LocusLink	Type	Chromosome (from UCSC)	Chromosome (from SOURCE)	Map (UCSC)	Map (SOURCE)	Strand	Start	End	GO: Molecular Function	GO: Biological Process	GO: Cellular Component
AAK1	0.91	0.019	0.993	0.008	1.091	0.289251	22848	NM_014911	Hs.552584	AP2 associated kinase 1	||AAK1||AP2 associated kinase 1||	22848	RefSeq	2	2	2p13.3	2p24.3-p14	-	69621109	69782500	ATP binding	protein amino acid phosphorylation
AATK	0.921	0.001	0.992	0.007	1.076	0.15239	9625	XM_375495
ABL1	0.605	0	0.808	0	1.336	2.52465	25	NM_007313	Hs.431048	V-abl Abelson murine leukemia viral oncogene homolog 1	||ABL1||2.7.1.112||p150||JTK7||abl protein||ABL1/NUP214 FUSION GENE||bcr/c-abl oncogene protein||proto-oncogene tyrosine-protein kinase ABL1||TRANSFORMATION GENE: ONCOGENE ABL||ABL ABL1/BCR FUSION GENE||ABELSON STRAIN OF MURINE LEUKEMIA VIRUS||v-abl Abelson murine leukemia viral oncogene homolog 1||Abelson murine leukemia viral (v-abl) oncogene homolog 1||v-abl Abelson murine leukemia viral oncog…	25	RefSeq	9	9	9q34.12	9q34.1	+	130619260	130792614	ATP binding	DNA damage response, signal transduction resulting in induction of apoptosis	nucleus
ABL2	0.816	0	0.973	0.017	1.193	1.21991	27	NM_005158	Hs.159472	V-abl Abelson murine leukemia viral oncogene homolog 2 (arg, Abelson-related gene)	||2.7.1.112||ABL2||ONCOGENE ABLL||ONCOGENE ABL2||ONCOGENE ARG ABL2/ETV6 FUSION GENE||Abelson murine leukemia viral (v-abl) oncogene homolog 2||v-abl Abelson murine leukemia viral oncogene homolog 2 isoform b||v-abl Abelson murine leukemia viral oncogene homolog 2 isoform a||v-abl Abelson murine leukemia viral oncogene homolog 2 (arg, Abelson-related gene)||	27	RefSeq	1	1	1q25.2	1q24-q25	-	175808413	175843842	ATP binding	intracellular signaling cascade	cytoplasm
ACK1	0.887	0.031	0.975	6.105	1.098	0.35312	10188	NM_005781	Hs.518513	Tyrosine kinase, non-receptor, 2	||ACK1||TNK2||ACTIVATED P21CDC42HS KINASE||Tyrosine kinase, non-receptor, 2||	10188	RefSeq	3	3	3q29	3q29	-	197078545	197124265	ATP binding	cytoskeleton organization and biogenesis	cytoplasm
ACVR1	1.028	0.024	1.039	0.028	1.01	-0.449798	90	NM_001105	Hs.470316	Activin A receptor, type I	||ACTRI||ACVR1||ALK2||ACVRLK2||SKR1||2.7.1.37||hydroxyalkyl-protein kinase||ACTIVIN RECEPTOR-LIKE KINASE 2||activin A receptor, type I||activin A type I receptor precursor||activin A receptor, type II-like kinase 2||	90	RefSeq	2	2	2q24.1	2q23-q24	-	158418468	158520298	ATP binding	protein amino acid phosphorylation	integral to plasma membrane
ACVR1B	1.182	0.023	1.171	0.004	0.99	-0.63228	91	NM_004302	Hs.438918	Activin A receptor, type IB	||ACTRIB||SKR2||ACVR1B||ALK4||ACVRLK4||2.7.1.37||activin receptor-like kinase 4||activin A receptor, type IB||serine(threonine) protein kinase receptor R2||activin A receptor, type II-like kinase 4||activin A type IB receptor isoform b precursor||activin A type IB receptor isoform c precursor||activin A type IB receptor isoform a precursor||	91	RefSeq	12	12	12q13.13	12q13	+	50631752	50677126	ATP binding	protein amino acid phosphorylation	integral to plasma membrane
ACVR2	1.138	0.012	1.13	0.018	0.992	-0.614032	92	NM_001616	Hs.470171	Activin A receptor, type II	||2.7.1.-||ACTRII||ACVR2||ACVR2A||Activin A receptor, type II||activin A receptor, type IIA precursor||	92	RefSeq	2	2	2q22.3	2q22.2-q23.3	+	148436303	148519242	ATP binding	protein amino acid phosphorylation	integral to plasma membrane
ACVR2B	0.888	0.02	0.875	0.001	0.985	-0.6779	93	NM_001106	Hs.517775	Activin A receptor, type IIB	||ActR-IIB||ACVR2B||ACTRIIB LEFT-RIGHT AXIS MALFORMATIONS||activin A receptor, type IIB||activin A type IIB receptor precursor||	93	RefSeq	3	3	3p22.2	3p22	+	38470813	38499868	ATP binding	protein amino acid phosphorylation	integral to plasma membrane
ACVRL1	0.776	0.004	0.813	0.015	1.047	-0.112208	94	NM_000020	Hs.410104	Activin A receptor type II-like 1	||ORW2||ALK1||ACVRL1||HHT2||ACVRLK1||ALK-1||SKR3||2.7.1.37||ACTIVIN RECEPTOR-LIKE KINASE 1||activin A receptor type II-like 1||Activin A receptor, type II-like kinase 1||	94	RefSeq	12	12	12q13.13	12q11-q14	+	50587468	50601120	ATP binding	circulation	integral to plasma membrane
ADAM9	0.918	0.021	1.004	0.011	1.093	0.307499	8754	NM_003816	Hs.2442	A disintegrin and metalloproteinase domain 9 (meltrin gamma)	||MDC9||MCMP||ADAM9||MYELOMA CELL METALLOPROTEINASE||METALLOPROTEINASE-LIKE, DISINTEGRIN-LIKE, AND CYSTEINE-RICH PROTEIN 9||A disintegrin and metalloproteinase domain 9 (meltrin gamma)||	8754	RefSeq	8	8	8p11.23	8p11.23	+	38973661	39081679	SH3 domain binding	protein kinase cascade	integral to plasma membrane
ADCK1	1.134	0.003	1.04	0.019	0.917	-1.29834	57143	NM_020421	Hs.413208	AarF domain containing kinase 1	||ADCK1||aarF domain containing kinase 1||	57143	RefSeq	14	14	14q24.3	14q24.3	+	77336226	77470047	ATP binding	protein amino acid phosphorylation
ADCK2	0.735	0.002	0.872	0.025	1.186	1.15604	90956	NM_052853	Hs.534141	AarF domain containing kinase 2	||ADCK2||aarF domain containing kinase 2||	90956	RefSeq	7	7	7q34	7q32-q34	+	139826136	139848092
ADCK4	0.818	0.089	0.981	0	1.198	1.26553	79934	NM_024876	Hs.130712	AarF domain containing kinase 4	||ADCK4||aarF domain containing kinase 4||	79934	RefSeq	19	19	19q13.2	19q13.2	-	45889273	45914440	kinase activity
ADCK5	0.899	0.015	0.941	0.004	1.046	-0.121332	203054	NM_174922	Hs.283374	AarF domain containing kinase 5	||ADCK5||aarF domain containing kinase 5||	203054	RefSeq	8	8	8q24.3	8q24.3	+	145568538	145589259	hydrolase activity, hydrolyzing O-glycosyl compounds	carbohydrate metabolism
ADK	1.04	0.011	1.052	0.008	1.011	-0.440674	132	NM_001123	Hs.500118	Adenosine kinase	||2.7.1.20||AK||ADK||adenosine 5'-phosphotransferase||Adenosine kinase||adenosine kinase isoform b||adenosine kinase isoform a||	132	RefSeq	10	10	10q22.2	10q22	+	75606449	76139066	adenosine kinase activity	purine ribonucleoside salvage
ADRA1A	0.966	0.003	0.932	0.03	0.964	-0.869506	148	NM_000680	Hs.52931	Adrenergic, alpha-1A-, receptor	||ADRA1L1||ALPHA1AAR||ADRA1A||ADRA1C, FORMERLY||adrenergic, alpha-1A-, receptor||adrenergic, alpha-1C-, receptor||ALPHA-1C-ADRENERGIC RECEPTOR, FORMERLY||G protein coupled receptor||alpha-1A-adrenergic receptor isoform 4||adrenergic, alpha -1A-, receptor||alpha-1A-adrenergic receptor isoform 3||alpha-1A-adrenergic receptor isoform 2||alpha-1A-adrenergic receptor isoform 1||adrenergic, alpha-1A-, …	148	RefSeq	8	8	8p21.2	8p21-p11.2	-	26683138	26778839	adrenoceptor activity	G-protein coupled receptor protein signaling pathway	integral to plasma membrane
ADRA1B	0.966	0.015	1.06	0.006	1.097	0.343996	147	NM_000679	Hs.368632	Adrenergic, alpha-1B-, receptor	||ALPHA1BAR||ADRA1B||alpha-1B-adrenergic receptor||ALPHA-1-ADRENERGIC RECEPTOR||adrenergic, alpha-1B-, receptor||adrenergic, alpha -1B-, receptor||	147	RefSeq	5	5	5q33.3	5q23-q32	+	159276317	159332129	adrenoceptor activity	G-protein coupled receptor protein signaling pathway	integral to plasma membrane
ADRB2	1.007	0.027	0.989	0.012	0.982	-0.705272	154	NM_000024	Hs.2551	Adrenergic, beta-2-, receptor, surface	||BAR||ADRBR||ADRB2||B2AR||BETA2AR||BETA-2-ADRENOCEPTOR||BETA-ADRENERGIC RECEPTOR||BETA-2-ADRENERGIC RECEPTOR||catecholamine receptor||beta-2 adrenoceptor||beta-2 adrenergic receptor||Adrenergic, beta-2-, receptor, surface||ADRB2R BETA-2-ADRENORECEPTOR AGONIST, REDUCED RESPONSE TO||	154	RefSeq	5	5	5q32	5q31-q32	+	148186368	148188379	beta2-adrenergic receptor activity	G-protein coupled receptor protein signaling pathway	endosome
ADRBK1	0.649	0.019	0.796	0.007	1.227	1.53012	156	NM_001619	Hs.83636	Adrenergic, beta, receptor kinase 1	||BETA-ARK1||GRK2||BARK1||2.7.1.126||ADRBK1||BETA-ADRENERGIC RECEPTOR KINASE 1||Adrenergic, beta, receptor kinase 1||G PROTEIN-DEPENDENT RECEPTOR KINASE 2||beta adrenergic receptor kinase 1||	156	RefSeq	11	11	11q13.2	11q13	+	66790668	66810945	ATP binding	protein amino acid phosphorylation	cytoplasm
ADRBK2	1.025	0.013	1.023	0.05	0.997	-0.568411	157	NM_005160	Hs.517493	Adrenergic, beta, receptor kinase 2	||GRK3||BARK2||2.7.1.126||ADRBK2||BETA-ADRENERGIC RECEPTOR KINASE 2||Adrenergic, beta, receptor kinase 2||beta adrenergic receptor kinase 2||	157	RefSeq	22	22	22q11.23	22q11	+	24285499	24444470	ATP binding	protein amino acid phosphorylation
AGTR2	1.051	0.015	1.097	0.028	1.043	-0.148704	186	NM_000686	Hs.405348	Angiotensin II receptor, type 2	||AT2||ATGR2||AGTR2||angiotensin receptor 2||angiotensin II receptor, type 2||AGTR2 MENTAL RETARDATION, X-LINKED NONSYNDROMIC, AGTR2-RELATED||	186	RefSeq	X	X	Xq23	Xq22-q23	+	115113884	115117702	angiotensin type II receptor activity	G-protein coupled receptor protein signaling pathway	integral to plasma membrane
AK1	1.017	0.013	1.212	0.011	1.192	1.21078	203	NM_000476	Hs.175473	Adenylate kinase 1	||AK1||2.7.4.3||Adenylate kinase 1||ADENYLATE KINASE, SOLUBLE ADENYLATE KINASE DEFICIENCY||	203	RefSeq	9	9	9q34.11	9q34.1	-	127708222	127719495	ATP binding	ATP metabolism	cytosol
AK2	0.979	0.003	1.031	0.001	1.052	-0.0665875	204	NM_001625	Hs.470907	Adenylate kinase 2	||ADK2||AK2||2.7.4.3||ATP-AMP transphosphorylase||Adenylate kinase 2||ADENYLATE KINASE, MITOCHONDRIAL MYOKINASE||adenylate kinase 2 isoform b||adenylate kinase 2 isoform c||adenylate kinase isoenzyme 2, mitochondrial||adenylate kinase 2 isoform a||	204	RefSeq	1	1	1p35.1	1p34	-	33147675	33171564	ATP binding	nucleobase, nucleoside, nucleotide and nucleic acid metabolism	mitochondrion
AK3	1.03	0.027	1.108	0.029	1.075	0.143266	205	NM_013410	Hs.10862	Adenylate kinase 3-like 1	||||AK3||Adenylate kinase 3-like 1||		RefSeq	1	1	1p31.3	9pter-p13	+	65325927	65404719	ATP binding	amino acid biosynthesis	mitochondrion
AK3L1	0.83	0.007	1.089	0.003	1.312	2.30567	50808	NM_016282	Hs.493362	Adenylate kinase 3	||AK3L1||AK3L1, FORMERLY||Adenylate kinase 3||ADENYLATE KINASE 3-LIKE 1, FORMERLY||	50808	RefSeq	9	9	9p24.1	9p24.1-p24.3	-	4701157	4731227	ATP binding	amino acid biosynthesis	mitochondrion
AK5	0.875	0.011	1.035	0.033	1.182	1.11954	26289	NM_012093	Hs.18268	Adenylate kinase 5	||AK5||Adenylate kinase 5||	26289	RefSeq	1	1	1p31.1	1p31	+	77460307	77737673	ATP binding	ADP biosynthesis	cytoplasm
AK7	1.126	0.01	1.202	0.005	1.067	0.0702735	122481	NM_152327	Hs.510373	Adenylate kinase 7	||AK7||Adenylate kinase 7||	122481	RefSeq	14	14	14q32.2	14q32.2	+	95928200	96024866	ATP binding
AKAP1	0.706	0.002	1.027	0.001	1.455	3.61041	8165	NM_003488	Hs.463506	A kinase (PRKA) anchor protein 1	||AKAP1||AKAP149||S-AKAP84||A-KINASE ANCHOR PROTEIN 1||A-KINASE ANCHOR PROTEIN, 149-KD||SPERMATID A-KINASE ANCHOR PROTEIN 84||A kinase (PRKA) anchor protein 1||	8165	RefSeq	17	17	17q23.2	17q21-q23	+	52517619	52553608	RNA binding		integral to membrane
AKAP11	0.671	0.027	0.859	0.035	1.28	2.0137	11215	NM_016248	Hs.105105	A kinase (PRKA) anchor protein 11	||AKAP220||AKAP11||A-KINASE ANCHOR PROTEIN, 220-KD||A-KINASE ANCHOR PROTEIN 11||A kinase (PRKA) anchor protein 11||	11215	RefSeq	13	13	13q14.11	13q14.11	+	41744288	41795402	protein kinase A binding	protein kinase cascade
AKAP13	0.943	0.003	1.055	0.011	1.118	0.535601	11214	NM_006738	Hs.459211	A kinase (PRKA) anchor protein 13	||BRX||AKAP13||HT31||LBC||LYMPHOID BLAST CRISIS ONCOGENE||A-KINASE ANCHOR PROTEIN 13||A kinase (PRKA) anchor protein 13||	11214	RefSeq	15	15	15q25.3	15q24-q25	+	83724874	84093590	Rho guanyl-nucleotide exchange factor activity	intracellular signaling cascade	membrane fraction
AKAP3	0.729	0.034	0.912	0.014	1.252	1.75823	10566	NM_006422	Hs.98397	A kinase (PRKA) anchor protein 3	||AKAP110||SOB1||FSP95||AKAP3||A-KINASE ANCHOR PROTEIN, 110-KD||A-KINASE ANCHOR PROTEIN 3||SPERM OOCYTE-BINDING PROTEIN 1||FIBROUS SHEATH PROTEIN, 95-KD||A kinase (PRKA) anchor protein 3||	10566	RefSeq	12	12	12p13.32	12p13.3	-	4594937	4624604	protein kinase A binding	acrosome reaction
AKAP4	0.886	0.007	1.037	0.014	1.17	1.01005	8852	NM_003886	Hs.97633	A kinase (PRKA) anchor protein 4	||AKAP4||AKAP82||TESTIS-SPECIFIC GENE HI||A-KINASE ANCHOR PROTEIN, 82-KD||FSC1, MOUSE, HOMOLOG OF||A-KINASE ANCHOR PROTEIN 4||A kinase (PRKA) anchor protein 4||	8852	RefSeq	X	X	Xp11.22	Xp11.2	-	49658446	49668700	kinase activity	cell motility	cAMP-dependent protein kinase complex
AKAP5	1.101	0.02	1.253	0.026	1.137	0.708958	9495	NM_004857	Hs.532489	A kinase (PRKA) anchor protein 5	||AKAP79||AKAP5||AKAP75, BOVINE, HOMOLOG OF||A-KINASE ANCHOR PROTEIN, 79-KD||A-KINASE ANCHOR PROTEIN 5||A kinase (PRKA) anchor protein 5||	9495	RefSeq	14	14	14q23.3	14q21-q24	+	64003577	64006172	calmodulin binding	protein targeting	plasma membrane
AKAP6	0.804	0.039	1.009	0.006	1.254	1.77647	9472	NM_004274	Hs.509083	A kinase (PRKA) anchor protein 6	||AKAP100||AKAP6||A-KINASE ANCHOR PROTEIN, 100-KD||A-KINASE ANCHOR PROTEIN 6||A kinase (PRKA) anchor protein 6||	9472	RefSeq	14	14	14q12	14q12	+	31868273	32372018	protein kinase A binding	protein targeting	nuclear membrane
AKAP7	0.966	0.003	1.162	8.926	1.202	1.30202	9465	NM_004842	Hs.486483	A kinase (PRKA) anchor protein 7	||AKAP18||AKAP7||A-KINASE ANCHOR PROTEIN, 18-KD||A-KINASE ANCHOR PROTEIN 7||A kinase (PRKA) anchor protein 7||	9465	RefSeq	6	6	6q23.2	6q23	+	131613196	131646366	protein kinase A binding	intracellular signaling cascade	apical plasma membrane
AKAP8	1.105	0.021	1.244	0.052	1.126	0.608594	10270	NM_005858	Hs.199029	A kinase (PRKA) anchor protein 8	||AKAP95||AKAP8||A-KINASE ANCHOR PROTEIN, 95-KD||A-KINASE ANCHOR PROTEIN 8||A kinase (PRKA) anchor protein 8||	10270	RefSeq	19	19	19p13.12	19p13.1-q12	-	15325335	15351603	DNA binding	mitosis	membrane
AKT1	1.013	0.01	1.025	0.007	1.011	-0.440674	207	NM_005163	Hs.525622	V-akt murine thymoma viral oncogene homolog 1	||AKT1||PRKBA||PKB-ALPHA||2.7.1.37||MGC99656||ONCOGENE AKT1||AKT1 protein||RAC-alpha serine/threonine-protein kinase||PROTEIN KINASE B-ALPHA||RAC SERINE/THREONINE PROTEIN KINASE||rac protein kinase alpha||murine thymoma viral (v-akt) oncogene homolog-1||V-akt murine thymoma viral oncogene homolog 1||	207	RefSeq	14	14	14q32.33	14q32.32	-	104306752	104330608	ATP binding	G-protein coupled receptor protein signaling pathway	nucleus
AKT2	0.691	0.013	0.844	0.011	1.221	1.47538	208	NM_001626	Hs.515406	V-akt murine thymoma viral oncogene homolog 2	||AKT2||PRKBB||2.7.1.-||RAC-BETA||PKB-BETA||PKBBETA||ONCOGENE AKT2||PROTEIN KINASE B-BETA||rac protein kinase beta||Murine thymoma viral (v-akt) homolog-2||V-akt murine thymoma viral oncogene homolog 2||	208	RefSeq	19	19	19q13.2	19q13.1-q13.2	-	45431555	45483034	ATP binding	protein amino acid phosphorylation
AKT3	0.845	0.03	0.995	0.009	1.177	1.07392	10000	NM_005465	Hs.498292	V-akt murine thymoma viral oncogene homolog 3 (protein kinase B, gamma)	||AKT3||v-akt murine thymoma viral oncogene homolog 3 (protein kinase B, gamma)||	10000	RefSeq	1	1	1q44	1q43-q44	-	239992524	240332594	ATP binding	protein amino acid phosphorylation
ALK	0.746	0.016	0.889	0.018	1.191	1.20166	238	NM_004304	Hs.196534	Anaplastic lymphoma kinase (Ki-1)	||ALK||CD246 antigen||anaplastic lymphoma kinase Ki-1||anaplastic lymphoma kinase (Ki-1)||ALK tyrosine kinase receptor precursor||	238	RefSeq	2	2	2p23.2	2p23	-	29327292	30056083	ATP binding	N-linked glycosylation	integral to plasma membrane
ACVR1C	0.966	0.016	1.123	0.012	1.162	0.93706	130399	NM_145259	Hs.352338	Activin A receptor, type IC	||ACVR1C||ALK7||ACTIVIN RECEPTOR-LIKE KINASE 7||activin A receptor, type IC||	130399	RefSeq	2	2	2q24.1	2q24.1	-	158214411	158310902	ATP binding	protein amino acid phosphorylation	integral to membrane
ALS2CR2	0.73	0.018	0.86	0.003	1.177	1.07392	55437	NM_018571	Hs.127519	Amyotrophic lateral sclerosis 2 (juvenile) chromosome region, candidate 2	||ILPIP||ALS2CR2||ILP-INTERACTING PROTEIN||Amyotrophic lateral sclerosis 2 (juvenile) chromosome region, candidate 2||AMYOTROPHIC LATERAL SCLEROSIS 2, JUVENILE, CHROMOSOME REGION GENE 2||	55437	RefSeq	2	2	2q33.1	2q33-q34	+	202141897	202170956	ATP binding	protein amino acid phosphorylation	cellular component unknown
ALS2CR7	0.918	0.021	1.124	0.012	1.223	1.49363	65061	NM_139158	Hs.348711	Amyotrophic lateral sclerosis 2 (juvenile) chromosome region, candidate 7	||ALS2CR7||Amyotrophic lateral sclerosis 2 (juvenile) chromosome region, candidate 7||	65061	RefSeq	2	2	2q33.1	2q33.2	+	202496703	202583769	ATP binding	protein amino acid phosphorylation
AMHR2	0.922	0.025	1.096	0.006	1.189	1.18341	269	NM_020547	Hs.437877	Anti-Mullerian hormone receptor, type II	||MISRII||AMHR2||anti-Mullerian hormone receptor, type II||ANTI-MULLERIAN HORMONE TYPE II RECEPTOR||anti-Mullerian hormone receptor type II||Mullerian inhibiting substance type II receptor||	269	RefSeq	12	12	12q13.13	12q13	+	52103907	52111579	ATP binding	Mullerian duct regression	integral to membrane
ANGPT4	0.76	0.029	0.922	0	1.213	1.40239	51378	NM_015985	Hs.278973	Angiopoietin 4	||ANG4||ANGPT4||Angiopoietin 4||	51378	RefSeq	20	20	20p13	20p13	-	801298	844960	transmembrane receptor protein tyrosine kinase activator activity	biological process unknown
ANKK1	0.937	0.006	1.174	0.029	1.251	1.7491	255239	NM_178510	Hs.448473	Ankyrin repeat and kinase domain containing 1	||ANKK1||Ankyrin repeat and kinase domain containing 1||	255239	RefSeq	11	11	11q23.2	11q23.2	+	112763722	112776350	ATP binding	protein amino acid phosphorylation
ANKRD3	0.946	0.015	1.042	0.017	1.101	0.380492	54101	NM_020639	Hs.517310	Receptor-interacting serine-threonine kinase 4	||DIK||ANKRD3||RIPK4||PKC-DELTA-INTERACTING PROTEIN KINASE||Receptor-interacting serine-threonine kinase 4||ANKYRIN REPEAT DOMAIN 3||	54101	RefSeq	21	21	21q22.3	21q22.3	-	42032597	42060318	ATP binding	protein amino acid phosphorylation	cellular component unknown
APEG1	1.006	0.028	1.075	0	1.068	0.0793976	10290	NM_005876	Hs.21639	Aortic preferentially expressed gene 1	||APEG1||Aortic preferentially expressed gene 1||	10290	RefSeq	2	2	2q35	2q35	+	220133900	220157088	ATP binding	muscle development	nucleus
APPL	0.87	0.009	0.981	0.008	1.127	0.617718	26060	NM_012096	Hs.476415	Adaptor protein containing pH domain, PTB domain and leucine zipper motif 1	||APPL1||APPL||DIP13-ALPHA||AKT2 INTERACTOR||adaptor protein containing pH domain, PTB domain and leucine zipper motif 1||ADAPTOR PROTEIN CONTAINING PH DOMAIN, PTB DOMAIN, AND LEUCINE ZIPPER MOTIF 1||	26060	RefSeq	3	3	3p14.3	3p21.1-p14.3	+	57236893	57282536	protein binding	cell cycle	colocalizes_with NuRD complex
ARAF1	1.007	0.027	1.071	0.057	1.063	0.0337772	369	NM_001654	Hs.446641	V-raf murine sarcoma 3611 viral oncogene homolog	||ARAF||RAFA1||A-RAF||2.7.1.-||Oncogene ARAF1||ONCOGENE PKS2||V-raf murine sarcoma 3611 viral oncogene homolog||v-raf murine sarcoma 3611 viral oncogene homolog 1||	369	RefSeq	X	X	Xp11.3	Xp11.4-p11.2	+	47176760	47187553	ATP binding	intracellular signaling cascade	cellular component unknown
ARK5	0.869	0.015	0.885	0.064	1.018	-0.376806	9891	NM_014840	Hs.524692	AMP-activated protein kinase family member 5	||KIAA0537||ARK5||AMPK-RELATED PROTEIN KINASE 5||AMP-activated protein kinase family member 5||	9891	RefSeq	12	12	12q23.3	12q23.3	-	104959591	105036278	ATP binding	protein amino acid phosphorylation
ASK	0.999	0.027	1.142	0.041	1.142	0.754579	10926	NM_006716	Hs.489037	Activator of S phase kinase	||ASK||ACTIVATOR OF S-PHASE KINASE||DBF4, S. CEREVISIAE, HOMOLOG OF||activator of S phase kinase||DUMBBELL FORMER 4, S. CEREVISIAE, HOMOLOG OF||	10926	RefSeq	7	7	7q21.12	7q21.3	+	87150194	87183507	DNA binding	DNA repair	nucleus
ASP	1.041	0.042	1.084	0.04	1.04	-0.176076	83853	NM_031916	Hs.381089	Ropporin 1-like	||ROPN1L||Ropporin 1-like||	83853	RefSeq	5	5	5p15.2	5p15.2	+	10495014	10518137
ATM	0.896	0.017	1.059	0.008	1.182	1.11954	472	NM_138293	Hs.435561	Ataxia telangiectasia mutated (includes complementation groups A, C and D)	||||ATM||Ataxia telangiectasia mutated (includes complementation groups A, C and D)||		RefSeq	11	11	11q22.3	11q22-q23	+	107663114	107666575	DNA binding	DNA repair	intracellular
ATR	1.024	0.027	1.051	0.034	1.025	-0.312937	545	NM_001184	Hs.271791	Ataxia telangiectasia and Rad3 related	||FRP1||ATR||SCKL1||Seckel syndrome||FRAP-related protein-1||ATAXIA-TELANGIECTASIA AND RAD3-RELATED||protein kinase ATR||FRAP-RELATED PROTEIN 1||ataxia telangiectasia and Rad3 related||ataxia telangiectasia and Rad3 related protein||	545	RefSeq	3	3	3q23	3q22-q24	-	143650777	143780349	DNA binding	DNA repair	chromosome
AURKB	0.898	0.016	0.972	0.008	1.082	0.207135	9212	NM_004217	Hs.442658	Aurora kinase B	||STK12||AIK2||AURKB||ARK2||AURORA-RELATED KINASE 2||aurora kinase B||AURORA/IPL1-LIKE KINASE 2||AIM1, RAT, HOMOLOG OF||SERINE/THREONINE PROTEIN KINASE 12||	9212	RefSeq	17	17	17p13.1	17p13.1	-	8048781	8054604	ATP binding	cell cycle
AURKC	1.035	0	1.223	0.025	1.181	1.11042	6795	NM_003160	Hs.98338	Aurora kinase C	||AURKC||AIE2||STK13||AURORA/IPL1/EG2-2||aurora kinase C||SERINE/THREONINE PROTEIN KINASE 13||	6795	RefSeq	19	19	19q13.43	19q13.43	+	62433981	62438727	ATP binding	cell cycle	centrosome
AVPR1A	0.875	0.03	0.997	0.035	1.138	0.718082	552	NM_000706	Hs.2131	Arginine vasopressin receptor 1A	||AVPR1A||V1a vasopressin receptor||V1-vascular vasopressin receptor AVPR1A||vascular/hepatic-type arginine vasopressin receptor||antidiuretic hormone receptor 1A||arginine vasopressin receptor 1A||SCCL vasopressin subtype 1a receptor||	552	RefSeq	12	12	12q14.2	12q14-q15	-	61826482	61832857	protein kinase C binding	G-protein coupled receptor protein signaling pathway	endosome
AVPR1B	0.764	0.015	0.901	0.003	1.178	1.08305	553	NM_000707	Hs.1372	Arginine vasopressin receptor 1B	||AVPR3||AVPR1B||vasopressin V1B receptor||pituitary vasopressin receptor 3||antidiuretic hormone receptor 1B||arginine vasopressin receptor 3||arginine vasopressin receptor 1B||ANTIDIURETIC HORMONE, RECEPTOR FOR, V1B||	553	RefSeq	1	1	1q32.1	1q32	+	202767010	202774698	protein kinase C binding	G-protein coupled receptor protein signaling pathway	endosome
AXL	1.007	0.015	1.116	0.024	1.108	0.44436	558	NM_001699	Hs.466791	AXL receptor tyrosine kinase	||UFO||AXL||2.7.1.112||oncogene AXL||AXL TRANSFORMING GENE||AXL transforming sequence/gene||AXL receptor tyrosine kinase||AXL receptor tyrosine kinase isoform 1||AXL receptor tyrosine kinase isoform 2||	558	RefSeq	19	19	19q13.2	19q13.1	+	46416662	46459510	ATP binding	protein amino acid phosphorylation	integral to plasma membrane
AZU1	1.067	0.071	0.967	0.027	0.905	-1.40783	566	NM_001700	Hs.72885	Azurocidin 1 (cationic antimicrobial protein 37)	||AZAMP||CAP37||HBP||HUMAZUR||AZU1||NAZC||heparin-binding protein||neutrophil azurocidin||azurocidin 1 preproprotein||CATIONIC ANTIMICROBIAL PROTEIN-37||Azurocidin 1 (cationic antimicrobial protein 37)||	566	RefSeq	19	19	19p13.3	19p13.3	+	778830	783017	chymotrypsin activity	cellular extravasation	azurophil granule
BCKDK	0.993	0	0.964	0.042	0.971	-0.805637	10295	NM_005881	Hs.513520	Branched chain ketoacid dehydrogenase kinase	||BCKDK||Branched chain ketoacid dehydrogenase kinase||	10295	RefSeq	16	16	16p11.2	16p11.2	+	31027221	31031420	ATP binding	protein amino acid phosphorylation	alpha-ketoglutarate dehydrogenase complex (sensu Eukaryota)
BCR	1.147	0.034	1.152	0.027	1.004	-0.504543	613	NM_004327	Hs.517461	Breakpoint cluster region	||||BCR||Breakpoint cluster region||		RefSeq	22	22	22q11.23	22q11	+	21847252	21982698	GTPase activator activity	intracellular signaling cascade	cellular component unknown
BDKRB2	1.07	0.028	1.241	0.033	1.16	0.918812	624	NM_000623	Hs.525572	Bradykinin receptor B2	||BK-2||B2R||BDKRB2||BKR2||DKFZp686O088||BK2||BRB2||BRADYKININ RECEPTOR 2||bradykinin receptor B2||	624	RefSeq	14	14	14q32.2	14q32.1-q32.2	+	95740949	95780536	bradykinin receptor activity	G-protein coupled receptor protein signaling pathway	integral to plasma membrane
BLK	1.15	0.035	1.124	0.025	0.977	-0.750893	640	NM_001715	Hs.146591	B lymphoid tyrosine kinase	||2.7.1.112||MGC10442||BLK||BLK nonreceptor tyrosine kinase||B lymphoid tyrosine kinase||TYROSINE KINASE, B-LYMPHOCYTE SPECIFIC||	640	RefSeq	8	8	8p23.1	8p23-p22	+	11388929	11459516	ATP binding	intracellular signaling cascade
BLNK	0.998	0.013	0.97	0.032	0.971	-0.805637	29760	NM_013314	Hs.444049	B-cell linker	||BLNK||B-cell linker||B-CELL LINKER PROTEIN||SH2 DOMAIN-CONTAINING LEUKOCYTE PROTEIN, 65-KD||SLP65 HYPOGLOBULINEMIA AND ABSENT B CELLS||	29760	RefSeq	10	10	10q24.1	10q23.2-q23.33	-	97941446	98021316	SH3/SH2 adaptor activity	B cell differentiation	cytoplasm
BMP2K	1.039	0.041	1.043	0.029	1.003	-0.513667	55589	NM_017593	Hs.146551	BMP2 inducible kinase	||BMP2K||BMP2 inducible kinase||	55589	RefSeq	4	4	4q21.21	4q21.21	+	80054710	80157772	ATP binding	protein amino acid phosphorylation	nucleus
BMPR1A	0.886	0.02	0.925	0.054	1.044	-0.13958	657	NM_004329	Hs.524477	Bone morphogenetic protein receptor, type IA	||ACVRLK3||BMPR1A||ALK3||2.7.1.37||ACTIVIN RECEPTOR-LIKE KINASE 3||bone morphogenetic protein receptor, type IA||bone morphogenetic protein receptor, type IA precursor||activin A receptor, type II-like kinase 3||	657	RefSeq	10	10	10q23.2	10q22.3	+	88506375	88674924	ATP binding	protein amino acid phosphorylation	integral to membrane
BMPR1B	0.869	0.018	0.876	0.01	1.008	-0.468047	658	NM_001203	Hs.480321	Bone morphogenetic protein receptor, type IB	||BMPR1B||ALK6||ALK-6||serine/threonine receptor kinase||ACTIVIN RECEPTOR-LIKE KINASE 6||bone morphogenetic protein receptor, type IB||	658	RefSeq	4	4	4q22.3	4q22-q24	+	96036305	96433254	ATP binding	BMP signaling pathway	integral to plasma membrane
BMPR2	0.614	0.047	0.825	0.014	1.344	2.59764	659	NM_001204	Hs.471119	Bone morphogenetic protein receptor, type II (serine/threonine kinase)	||BMPR-II||BRK-3||2.7.1.37||PPH1||BMPR2||BMPR3||T-ALK||BMR2||type II activin receptor-like kinase||bone morphogenetic protein receptor, type II (serine/threonine kinase)||bone morphogenetic protein receptor, type II isoform 2, precursor||bone morphogenetic protein receptor, type II isoform 1 precursor||	659	RefSeq	2	2	2q33.1	2q33-q34	+	203067104	203257979	ATP binding	protein amino acid phosphorylation	integral to plasma membrane
BMX	0.845	0.006	0.91	0.032	1.076	0.15239	660	NM_001721	Hs.495731	BMX non-receptor tyrosine kinase	||BMX||2.7.1.112||ETK||PSCTK2||PSCTK3||BONE MARROW KINASE, X-LINKED||PROTEIN TYROSINE KINASE BMX||BMX non-receptor tyrosine kinase||	660	RefSeq	X	X	Xp22.2	Xp22.2	+	15285097	15334308	ATP binding	intracellular signaling cascade
BRD2	0.681	0.036	0.855	0.023	1.255	1.7856	6046	NM_005104	Hs.75243	Bromodomain containing 2	||BRD2||FSRG1||RING3||Bromodomain containing 2||BROMODOMAIN-CONTAINING PROTEIN 2||FEMALE STERILE HOMEOTIC-RELATED GENE 1, MOUSE, HOMOLOG OF||	6046	RefSeq	6	6	6p21.32	6p21.3	+	33044414	33057059	protein serine/threonine kinase activity	spermatogenesis	nucleus
BRDT	0.855	0.016	0.888	0.047	1.039	-0.1852	676	NM_001726	Hs.482520	Bromodomain, testis-specific	||BRD6||BRDT||Bromodomain, testis-specific||testis-specific bromodomain protein||	676	RefSeq	1	1	1p22.1	1p22.1	+	92129766	92192004	DNA binding	cell cycle	nucleus
BTK	0.933	0.011	0.963	0.044	1.032	-0.249069	695	NM_000061	Hs.159494	Bruton agammaglobulinemia tyrosine kinase	||BTK||ATK||IMD1||2.7.1.112||AGMX1||XLA||OTTHUMP00000063593||PSCTK1||HYPOGAMMAGLOBULINEMIA, X-LINKED||IMMUNODEFICIENCY 1||BPK AGAMMAGLOBULINEMIA, X-LINKED||B-CELL PROGENITOR KINASE||Bruton's tyrosine kinase||BRUTON TYPE AGAMMAGLOBULINEMIA||AGAMMAGLOBULINEMIA, X-LINKED, TYPE I||Bruton agammaglobulinemia tyrosine kinase||frameshift mutation results in truncated protein||	695	RefSeq	X	X	Xq22.1	Xq21.33-q22	-	100410586	100447327	ATP binding	calcium-mediated signaling	cytoplasm
BUB1	0.614	0.03	0.813	0	1.322	2.39691	699	NM_004336	Hs.469649	BUB1 budding uninhibited by benzimidazoles 1 homolog (yeast)	||BUB1L||hBUB1||2.7.1.37||BUB1A||BUB1||putative serine/threonine-protein kinase||MITOTIC CHECKPOINT GENE BUB1||mitotic spindle checkpoint kinase||BUB1, S. CEREVISIAE, HOMOLOG OF||budding uninhibited by benzimidazoles 1 (yeast homolog)||BUB1 budding uninhibited by benzimidazoles 1 homolog (yeast)||BUDDING UNINHIBITED BY BENZIMIDAZOLES 1, S. CEREVISIAE, HOMOLOG OF||	699	RefSeq	2	2	2q13	2q14	-	111111642	111151853	ATP binding	cell cycle	kinetochore
BUB1B	0.77	0.025	0.867	0.014	1.125	0.59947	701	NM_001211	Hs.36708	BUB1 budding uninhibited by benzimidazoles 1 homolog beta (yeast)	||hBUBR1||BUB1beta||SSK1||BUB1B||Bub1A||MAD3L||2.7.1.37||MAD3/BUB1-related protein kinase||MITOTIC CHECKPOINT GENE BUB1B||BUB1, S. CEREVISIAE, HOMOLOG OF, BETA||budding uninhibited by benzimidazoles 1 (yeast homolog), beta||BUB1 budding uninhibited by benzimidazoles 1 homolog beta (yeast)||BUDDING UNINHIBITED BY BENZIMIDAZOLES 1, S. CEREVISIAE, HOMOLOG OF, BETA||	701	RefSeq	15	15	15q15.1	15q15	+	38240579	38300613	ATP binding	cell cycle	anaphase-promoting complex
C14ORF20	0.695	0.034	0.75	0.002	1.079	0.179762	283629	NM_174944	Hs.314432	Testis-specific serine kinase 4	||C14orf20||TSSK4||Testis-specific serine kinase 4||	283629	RefSeq	14	14	14q11.2	14q11.2	+	23744801	23747292	ATP binding	protein amino acid phosphorylation
TP53RK	0.763	0.023	0.877	0.018	1.149	0.818447	112858	NM_033550	Hs.440263	TP53 regulating kinase	||TP53RK||PRPK||TP53-REGULATING KINASE||TP53 regulating kinase||p53-RELATED PROTEIN KINASE||	112858	RefSeq	20	20	20q13.12	20q13.2	-	44746411	44751683	ATP binding	protein amino acid phosphorylation	nucleus
TRIB3	0.916	0	0.94	0.012	1.027	-0.294689	57761	NM_021158	Hs.516826	Tribbles homolog 3 (Drosophila)	||TRIB3||tribbles homolog 3 (Drosophila)||	57761	RefSeq	20	20	20p13	20p13-p12.2	+	309307	326201	ATP binding	activation of MAPK	nucleus
C6ORF199	0.922	0.022	0.945	0.003	1.024	-0.322061	221264	NM_145025	Hs.486169	Chromosome 6 open reading frame 199	||C6orf199||Chromosome 6 open reading frame 199||	221264	RefSeq	6	6	6q21	6q21	-	110059591	110119113	ATP binding
C7ORF16	0.905	0.013	0.924	0.005	1.021	-0.349434	10842	NM_006658	Hs.227011	Chromosome 7 open reading frame 16	||C7orf16||GSBS||G-SUBSTRATE||Chromosome 7 open reading frame 16||	10842	RefSeq	7	7	7p14.3	7p15	+	31500086	31521308	protein phosphatase inhibitor activity	behavior	soluble fraction
TRIB1	1.02	0.003	0.993	0.001	0.974	-0.778265	10221	NM_025195	Hs.444947	Tribbles homolog 1 (Drosophila)	||TRIB1||tribbles homolog 1 (Drosophila)||	10221	RefSeq	8	8	8q24.13	8q24.13	+	126511744	126519824	ATP binding	cell proliferation	cytoplasm
C9ORF12	0.993	0.003	1.001	0.037	1.008	-0.468047	64768	NM_022755	Hs.16603	Chromosome 9 open reading frame 12	||C9orf12||Chromosome 9 open reading frame 12||	64768	RefSeq	9	9	9q22.31	9q21.33-q22.31	-	92456397	92512102	kinase activity
CALM3	1.148	0.007	1.143	0.001	0.995	-0.586659	808	NM_005184	Hs.515487	Calmodulin 3 (phosphorylase kinase, delta)	||CALM3||PHKD3||Calmodulin 3 (phosphorylase kinase, delta)||	808	RefSeq	19	19	19q13.32	19q13.2-q13.3	+	51796408	51805879	calcium ion binding
CAMK1	0.989	0.033	1.074	0.008	1.085	0.234507	8536	NM_003656	Hs.434875	Calcium/calmodulin-dependent protein kinase I	||CAMKI||CAMK1||calcium/calmodulin-dependent protein kinase I||	8536	RefSeq	3	3	3p25.3	3p25.3	-	9774031	9786661	ATP binding	cell differentiation	nucleus
CAMK1D	0.973	0.022	1.036	0.051	1.064	0.0429013	57118	NM_020397	Hs.156723	Calcium/calmodulin-dependent protein kinase ID	||CKLIK||CAMK1D||CAMK1-LIKE PROTEIN KINASE||calcium/calmodulin-dependent protein kinase ID||	57118	RefSeq	10	10	10p13	10p13	+	12431737	12908141	ATP binding	protein amino acid phosphorylation	nucleus
CAMK1G	0.98	0.006	1.027	0.002	1.047	-0.112208	57172	NM_020439	Hs.199068	Calcium/calmodulin-dependent protein kinase IG	||CAMK1G||calcium/calmodulin-dependent protein kinase IG||	57172	RefSeq	1	1	1q32.2	1q32-q41	+	206145439	206175678	ATP binding	protein amino acid phosphorylation	Golgi apparatus
CAMK2A	0.971	0.015	1.072	0.001	1.104	0.407864	815	NM_015981	Hs.143535	Calcium/calmodulin-dependent protein kinase (CaM kinase) II alpha	||KIAA0968||2.7.1.123||CAMKA||CAMK2A||CaMK-II alpha subunit||CaM-kinase II alpha chain||CALCIUM/CALMODULIN-DEPENDENT PROTEIN KINASE II-ALPHA||CALCIUM/CALMODULIN-DEPENDENT PROTEIN KINASE TYPE IIA||CaM kinase II alpha subunit||calcium/calmodulin-dependent protein kinase IIA isoform 1||calcium/calmodulin-dependent protein kinase IIA isoform 2||calcium/calmodulin-dependent protein kinase II alpha-B s…	815	RefSeq	5	5	5q32	5q32	-	149579247	149649529	ATP binding	protein amino acid phosphorylation
CAMK2B	0.975	0.045	0.953	0.007	0.978	-0.741769	816	NM_001220	Hs.351887	Calcium/calmodulin-dependent protein kinase (CaM kinase) II beta	||MGC29528||CAMKB||CAMK2B||CAM2||2.7.1.123||CaMK-II beta subunit||CaM-kinase II beta chain||CALCIUM/CALMODULIN-DEPENDENT PROTEIN KINASE II-BETA||proline rich calmodulin-dependent protein kinase||CaM kinase II beta subunit||calcium/calmodulin-dependent protein kinase IIB isoform 6||calcium/calmodulin-dependent protein kinase IIB isoform 8||calcium/calmodulin-dependent protein kinase IIB isoform 1|…	816	RefSeq	7	7	7p13	22q12	-	44032136	44138464	ATP binding	protein amino acid phosphorylation
CAMK2D	0.949	0.007	0.917	0.001	0.965	-0.860382	817	NM_001221	Hs.144114	Calcium/calmodulin-dependent protein kinase (CaM kinase) II delta	||2.7.1.123||CAMKD||MGC44911||CAMK2D||CaMK-II delta subunit||CALCIUM/CALMODULIN-DEPENDENT PROTEIN KINASE II-DELTA||CaM-kinase II delta chain||CaM kinase II delta subunit||calcium/calmodulin-dependent protein kinase (CaM kinase) II delta||calcium/calmodulin-dependent protein kinase II delta isoform 1||calcium/calmodulin-dependent protein kinase II delta isoform 2||calcium/calmodulin-dependent prot…	817	RefSeq	4	4	4q26	4q26	-	114733168	115040332	ATP binding	protein amino acid phosphorylation	cellular component unknown
CAMK2G	0.846	0.018	0.839	0	0.991	-0.623156	818	NM_001222	Hs.523045	Calcium/calmodulin-dependent protein kinase (CaM kinase) II gamma	||CAMK2G||CAMKG||CAMK-II||MGC26678||2.7.1.123||CALCIUM/CALMODULIN-DEPENDENT PROTEIN KINASE II-GAMMA||CaM KINASE II GAMMA SUBUNIT||calcium/calmodulin-dependent protein kinase II gamma isoform 2||calcium/calmodulin-dependent protein kinase II gamma isoform 3||calcium\/calmodulin-dependent protein kinase (CaM kinase) II gamma||calcium/calmodulin-dependent protein kinase (CaM kinase) II gamma||calciu…	818	RefSeq	10	10	10q22.2	10q22	-	75242264	75304344	ATP binding	insulin secretion	cellular component unknown
CAMK4	0.951	0.021	0.929	0.01	0.976	-0.760017	814	NM_001744	Hs.220629	Calcium/calmodulin-dependent protein kinase IV	||2.7.1.123||CAMK4||CaMK-GR||MGC36771||CAM kinase IV||CAM kinase- GR||calcium/calmodulin-dependent protein kinase IV||BRAIN Ca(2+)/CALMODULIN-DEPENDENT PROTEIN KINASE TYPE IV||brain Ca(2+)-calmodulin-dependent protein kinase type IV||calcium/calmodulin-dependent protein kinase type IV catalytic chain||	814	RefSeq	5	5	5q22.1	5q21.3	+	110587980	110848645	ATP binding	protein amino acid phosphorylation	nucleus
CAMKK1	0.961	0.03	0.956	0.015	0.994	-0.595784	84254	NM_172207	Hs.8417	Calcium/calmodulin-dependent protein kinase kinase 1, alpha	||CAMKK1||Calcium/calmodulin-dependent protein kinase kinase 1, alpha||	84254	RefSeq	17	17	17p13.2	17p13.2	-	3715201	3743086	ATP binding	protein amino acid phosphorylation	nucleus
CAMKK2	0.884	0.015	0.867	0.01	0.98	-0.723521	10645	NM_006549	Hs.297343	Calcium/calmodulin-dependent protein kinase kinase 2, beta	||CAMKK2||Calcium/calmodulin-dependent protein kinase kinase 2, beta||	10645	RefSeq	12	12	12q24.31	12q24.2	-	120138216	120198831	ATP binding	MAPKKK cascade	intracellular
CARD10	0.891	0.011	0.888	0.034	0.996	-0.577535	29775	NM_014550	Hs.57973	Caspase recruitment domain family, member 10	||CARD10||CARMA3||BIMP1||CARD-MAGUK PROTEIN 3||BCL10-INTERACTING MAGUK PROTEIN 1||CASPASE RECRUITMENT DOMAIN-CONTAINING PROTEIN 10||Caspase recruitment domain family, member 10||	29775	RefSeq	22	22	22q13.1	22q13.1	-	36210902	36239710	protein binding	activation of NF-kappaB-inducing kinase	cytoplasm
CARD14	0.812	0.015	0.842	0.01	1.036	-0.212573	79092	NM_024110	Hs.550529	Caspase recruitment domain family, member 14	||CARD14||BIMP2||CARMA2||CARD-MAGUK PROTEIN 2||BCL10-INTERACTING MAGUK PROTEIN 2||CASPASE RECRUITMENT DOMAIN-CONTAINING PROTEIN 14||Caspase recruitment domain family, member 14||	79092	RefSeq	17	17	17q25.3	17q25	+	75766875	75797446	protein binding	activation of NF-kappaB-inducing kinase	intracellular
TNNI3K	0.785	6.579	0.79	0.022	1.005	-0.495419	51086	NM_015978	Hs.513262	TNNI3 interacting kinase	||TNNI3K||TNNI3 interacting kinase||	51086	RefSeq	1	1	1p31.1	1p31.1	+	74413105	74722129	ATP binding	protein amino acid phosphorylation
CARKL	0.811	0.027	0.812	0.005	1.001	-0.531915	23729	NM_013276	Hs.553521	Carbohydrate kinase-like	||CARKL||Carbohydrate kinase-like||	23729	RefSeq	17	17	17p13.2	17p13	-	3458304	3486365	kinase activity	carbohydrate metabolism
CASK	0.853	0.005	0.912	0.017	1.069	0.0885216	8573	NM_003688	Hs.495984	Calcium/calmodulin-dependent serine protein kinase (MAGUK family)	||CASK||VERTEBRATE LIN2 HOMOLOG||calcium/calmodulin-dependent serine protein kinase (MAGUK family)||	8573	RefSeq	X	X	Xp11.4	Xp11.4	-	41135596	41538522	ATP binding	cell adhesion	actin cytoskeleton
CCL2	0.921	0.003	0.929	0.023	1.007	-0.477171	6347	NM_002982	Hs.303649	Chemokine (C-C motif) ligand 2	||SCYA2||CCL2||MCAF||MCP1||MONOCYTE CHEMOTACTIC PROTEIN 1||SMALL INDUCIBLE CYTOKINE A2||MONOCYTE CHEMOTACTIC AND ACTIVATING FACTOR||chemokine (C-C motif) ligand 2||	6347	RefSeq	17	17	17q12	17q11.2-q21.1	+	29606410	29608331	chemokine activity	G-protein signaling, coupled to cyclic nucleotide second messenger	extracellular space
CCL4	0.897	0.015	0.931	0.022	1.038	-0.194325	6351	NM_002984	Hs.75703	Chemokine (C-C motif) ligand 4	||ACT2||MIP1B1||AT744.1||CCL4||SCYA4, FORMERLY||IMMUNE ACTIVATION 2||MACROPHAGE INFLAMMATORY PROTEIN 1-BETA||SMALL INDUCIBLE CYTOKINE A4, FORMERLY||chemokine (C-C motif) ligand 4||CHEMOKINE, CC MOTIF, LIGAND 4||	6351	RefSeq	17	17	17q12	17q12	+	31455332	31457127	chemokine activity	cell adhesion	extracellular space
CCRK	0.979	0.006	0.977	0.011	0.998	-0.559287	23552	NM_012119	Hs.522274	Cell cycle related kinase	||CCRK||Cell cycle related kinase||	23552	RefSeq	9	9	9q22.1	9q22.1	-	87810914	87819171	ATP binding	protein amino acid phosphorylation
CD3E	0.96	0.032	0.973	0.004	1.013	-0.422426	916	NM_000733	Hs.3003	CD3E antigen, epsilon polypeptide (TiT3 complex)	||T3E||CD3E||CD3 ANTIGEN, EPSILON SUBUNIT||CD3E antigen, epsilon polypeptide (TiT3 complex)||TCRE IMMUNODEFICIENCY DUE TO DEFECT IN CD3-EPSILON||T-CELL ANTIGEN RECEPTOR COMPLEX, EPSILON SUBUNIT OF T3||	916	RefSeq	11	11	11q23.3	11q23	+	117680823	117692096	SH3 domain binding	G-protein coupled receptor protein signaling pathway	T cell receptor complex
CD4	0.921	0	0.96	0.025	1.042	-0.157828	920	NM_000616	Hs.17483	CD4 antigen (p55)	||CD4||CD4mut||CD4 receptor||T-CELL ANTIGEN T4/LEU3||CD4 antigen (p55)||T-CELL OKT4 DEFICIENCY||CD4 CD4+ LYMPHOCYTE DEFICIENCY||	920	RefSeq	12	12	12p13.31	12pter-p12	+	6769004	6800235	MHC class II protein binding	T cell differentiation	T cell receptor complex
CD7	0.93	0.028	0.984	0.001	1.057	-0.0209672	924	NM_006137	Hs.36972	CD7 antigen (p41)	||GP40||LEU-9||CD7||Tp40||Tp41||p41 protein||CD7 antigen precursor||CD7 antigen (p41)||T-cell leukemia antigen||T-cell antigen CD7 precursor||	924	RefSeq	17	17	17q25.3	17q25.2-q25.3	-	77866034	77868741	receptor activity	T cell activation	integral to membrane
CDADC1	0.886	0.013	0.962	0	1.085	0.234507	81602	NM_030911	Hs.388220	Cytidine and dCMP deaminase domain containing 1	||CDADC1||cytidine and dCMP deaminase domain containing 1||	81602	RefSeq	13	13	13q14.2	13q14.2	+	48720103	48765619	hydrolase activity
CDC2	0.888	0.006	0.891	0.022	1.004	-0.504543	983	NM_001786	Hs.334562	Cell division cycle 2, G1 to S and G2 to M	||2.7.1.-||p34(CDC2)||CDK1||CDC2||p34 protein kinase||cyclin-dependent kinase 1||cell cycle controller CDC2||cell division control protein 2 homolog||cell division cycle 2 protein isoform 2||cell division cycle 2 protein isoform 1||cell division cycle 2, G1 to S and G2 to M||	983	RefSeq	10	10	10q21.2	10q21.1	+	62208241	62223930	ATP binding	cytokinesis	nucleus
CDC2L1	0.935	0.018	0.94	0.015	1.005	-0.495419	984	NM_001787	Hs.192316	Cell division cycle 2-like 1 (PITSLRE proteins)	||||CDC2L1||Cell division cycle 2-like 1 (PITSLRE proteins)||		RefSeq		1		1p36				ATP binding	apoptosis	cytoplasm
CDC2L2	0.994	0.036	1.025	0.004	1.031	-0.258193	985	NM_024011	Hs.515679	Cell division cycle 2-like 2 (PITSLRE proteins)	||||CDC2L2||Cell division cycle 2-like 2 (PITSLRE proteins)||		RefSeq		1		1p36.3				ATP binding	apoptosis	nucleus
CDC2L5	0.902	0.011	1.001	0.009	1.109	0.453484	8621	NM_003718	Hs.233552	Cell division cycle 2-like 5 (cholinesterase-related cell division controller)	||CDC2L5||CHED||CELL DIVISION CONTROLLER, CHOLINESTERASE-RELATED||Cell division cycle 2-like 5 (cholinesterase-related cell division controller)||	8621	RefSeq	7	7	7p14.1	7p13	+	39763348	39908385	ATP binding	development
CDC42BPA	0.927	0.025	0.993	0.002	1.071	0.10677	8476	NM_003607	Hs.35433	CDC42 binding protein kinase alpha (DMPK-like)	||CDC42BPA||PK428||CDC42 binding protein kinase alpha (DMPK-like)||PROTEIN KINASE, SERINE/THREONINE, RELATED TO THE MYOTONIC DYSTROPHY PROTEIN KINASE||	8476	RefSeq	1	1	1q42.13	1q42.11	-	223486787	223812561	ATP binding	intracellular signaling cascade	membrane
CDC42BPB	1.021	0.053	1.05	0.011	1.028	-0.285565	9578	NM_006035	Hs.510533	CDC42 binding protein kinase beta (DMPK-like)	||CDC42BPB||CDC42 binding protein kinase beta (DMPK-like)||	9578	RefSeq	14	14	14q32.32	14q32.3	-	102468469	102593552	ATP binding	establishment and/or maintenance of cell polarity	cytoskeleton
CDC7	1.009	0.034	1.039	0.015	1.029	-0.276441	8317	NM_003503	Hs.533573	CDC7 cell division cycle 7 (S. cerevisiae)	||CDC7L1||CDC7||CDC7 cell division cycle 7 (S. cerevisiae)||CELL DIVISION CYCLE 7, S. CEREVISIAE, HOMOLOG-LIKE 1||	8317	RefSeq	1	1	1p22.2	1p22	+	91678464	91703334	ATP binding	DNA replication initiation	cytoplasm
CDK10	1.04	0.034	1.062	0.009	1.021	-0.349434	8558	NM_003674	Hs.77313	Cyclin-dependent kinase (CDC2-like) 10	||PISSLRE||CDK10||CYCLIN-DEPENDENT KINASE 10||cyclin-dependent kinase (CDC2-like) 10||	8558	RefSeq	16	16	16q24.3	16q24	+	88280578	88290262	ATP binding	negative regulation of cell proliferation
CDK11	0.949	0.018	0.992	0.006	1.044	-0.13958	23097	NM_015076	Hs.193251	Cell division cycle 2-like 6 (CDK8-like)	||CDC2L6||cell division cycle 2-like 6 (CDK8-like)||	23097	RefSeq	6	6	6q21	6q21	-	111037873	111243105	ATP binding	protein amino acid phosphorylation
CDK2	0.923	0.004	0.937	0.004	1.015	-0.404178	1017	NM_001798	Hs.19192	Cyclin-dependent kinase 2	||2.7.1.-||CDK2||p33(CDK2)||Cyclin-dependent kinase 2||cdc2-related protein kinase||p33 protein kinase||cell devision kinase 2||CELL DIVISION KINASE 2||cyclin-dependent kinase 2 isoform 1||cyclin-dependent kinase 2 isoform 2||	1017	RefSeq	12	12	12q13.2	12q13	+	54646825	54652834	ATP binding	G2/M transition of mitotic cell cycle	cytoplasm
CDK3	0.898	0.045	0.938	0.029	1.044	-0.13958	1018	NM_001258	Hs.100009	Cyclin-dependent kinase 3	||CDK3||Cyclin-dependent kinase 3||CELL DIVISION KINASE 3||	1018	RefSeq	17	17	17q25.1	17q22-qter	+	71509013	71513251	ATP binding	cell proliferation
CDK4	0.865	0.014	0.879	0.035	1.016	-0.395054	1019	NM_000075	Hs.95577	Cyclin-dependent kinase 4	||2.7.1.-||CMM3||CDK4||MGC14458||PSK-J3||Cyclin-dependent kinase 4||melanoma cutaneous malignant, 3||cell division kinase 4||	1019	RefSeq	12	12	12q14.1	12q14	-	56428271	56432431	ATP binding	G1/S transition of mitotic cell cycle
CDK5	0.839	0.067	1.022	0.022	1.218	1.44801	1020	NM_004935	Hs.166071	Cyclin-dependent kinase 5	||PSSALRE||2.7.1.-||CDK5||Cyclin-dependent kinase 5||CELL DIVISION KINASE 5||	1020	RefSeq	7	7	7q36.1	7q36	-	150188546	150192644	ATP binding	cell cycle
CDK5R1	0.976	0.032	0.981	0.001	1.005	-0.495419	8851	NM_003885	Hs.500015	Cyclin-dependent kinase 5, regulatory subunit 1 (p35)	||CDK5R1||p35(NCK5A)||p35 p25||NEURONAL CDK5 ACTIVATOR||CYCLIN-DEPENDENT KINASE 5, REGULATORY PARTNER, 35-KD||Cyclin-dependent kinase 5, regulatory subunit 1 (p35)||	8851	RefSeq	17	17	17q11.2	17q11.2	+	27838217	27842383	cyclin-dependent protein kinase 5 activator activity	brain development	cyclin-dependent protein kinase 5 activator complex
CDK5R2	1.046	0.03	1.03	0.011	0.984	-0.687024	8941	NM_003936	Hs.158460	Cyclin-dependent kinase 5, regulatory subunit 2 (p39)	||p39(NCK5AI)||CDK5R2||NEURONAL CDK5 ACTIVATOR ISOFORM||CYCLIN-DEPENDENT KINASE 5, REGULATORY PARTNER, 39-KD||Cyclin-dependent kinase 5, regulatory subunit 2 (p39)||	8941	RefSeq	2	2	2q35	2q35	+	219649902	219652381	cyclin-dependent protein kinase 5 activator activity	regulation of cyclin dependent protein kinase activity	cyclin-dependent protein kinase 5 activator complex
CDK5RAP1	1.041	0.042	1.036	0.004	0.995	-0.586659	51654	NM_016082	Hs.435952	CDK5 regulatory subunit associated protein 1	||CDK5RAP1||CDK5 REGULATORY SUBUNIT-ASSOCIATED PROTEIN 1||CDK5 regulatory subunit associated protein 1||	51654	RefSeq	20	20	20q11.21	20pter-q11.23	-	31410305	31452998	catalytic activity	brain development	cellular component unknown
CDK5RAP3	1.022	0.036	1.055	0.023	1.032	-0.249069	80279	NM_025197	Hs.20157	CDK5 regulatory subunit associated protein 3	||CDK5RAP3||CDK5 REGULATORY SUBUNIT-ASSOCIATED PROTEIN 3||CDK5 regulatory subunit associated protein 3||	80279	RefSeq	17	17	17q21.32	17q21.32	+	43403427	43414146	neuronal Cdc2-like kinase binding	brain development	cellular component unknown
CDK6	1.008	0.018	1.074	0.032	1.065	0.0520254	1021	NM_001259	Hs.119882	Cyclin-dependent kinase 6	||2.7.1.-||CDK6||MGC59692||Cyclin-dependent kinase 6||PLSTIRE CDK6/MLL FUSION GENE||cell division protein kinase 6||	1021	RefSeq	7	7	7q21.2	7q21-q22	-	91878887	92107863	ATP binding	G1 phase of mitotic cell cycle
CDK7	0.987	0.048	1.039	0.03	1.052	-0.0665875	1022	NM_001799	Hs.184298	Cyclin-dependent kinase 7 (MO15 homolog, Xenopus laevis, cdk-activating kinase)	||2.7.1.-||p39MO15||CDKN7||CDK7||CAK1||serine/threonine kinase stk1||39 KDa protein kinase||serine/threonine protein kinase 1||serine/threonine protein kinase MO15||kinase subunit of CAK||MO15, XENOPUS, HOMOLOG OF||cell division protein kinase 7||cyclin-dependent kinase 7 (MO15 homolog, Xenopus laevis, cdk-activating kinase)||cyclin-dependent kinase 7 (homolog of Xenopus MO15 cdk-activating kinas…	1022	RefSeq	5	5	5q13.2	5q12.1	+	68566470	68609004	ATP binding	DNA repair	nucleus
CDK8	0.986	0.009	0.987	0.047	1	-0.541039	1024	NM_001260	Hs.382306	Cyclin-dependent kinase 8	||2.7.1.-||CDK8||Cyclin-dependent kinase 8||protein kinase K35||CDK8 protein kinase||cell division protein kinase 8||	1024	RefSeq	13	13	13q12.13	13q12	+	25726755	25876569	ATP binding	cytokinesis
CDK9	0.92	0.011	1.008	0.022	1.095	0.325747	1025	NM_001261	Hs.150423	Cyclin-dependent kinase 9 (CDC2-related kinase)	||CDC2L4||CDK9||C-2k||TAK||serine/threonine protein kinase PITALRE||cell division protein kinase 9||cyclin-dependent kinase 9 (CDC2-related kinase)||	1025	RefSeq	9	9	9q34.11	9q34.1	+	127627890	127631917	ATP binding	RNA elongation from RNA polymerase II promoter	nucleus
CDKL1	0.855	0.03	0.894	0.032	1.045	-0.130456	8814	NM_004196	Hs.280881	Cyclin-dependent kinase-like 1 (CDC2-related kinase)	||p42||KKIALRE||CDKL1||cyclin-dependent kinase-like 1 (CDC2-related kinase)||	8814	RefSeq	14	14	14q21.3	14q21.3	-	49866469	49932367	ATP binding	protein amino acid phosphorylation
CDKL2	0.906	0.048	0.928	0.007	1.023	-0.331186	8999	NM_003948	Hs.310540	Cyclin-dependent kinase-like 2 (CDC2-related kinase)	||KKIAMRE||CDKL2||p56||cyclin-dependent kinase-like 2 (CDC2-related kinase)||	8999	RefSeq	4	4	4q21.1	4q21.1	-	76861525	76912750	ATP binding	protein amino acid phosphorylation
CDKL3	0.907	0.001	0.993	0.028	1.094	0.316623	51265	NM_016508	Hs.105818	Cyclin-dependent kinase-like 3	||NKIAMRE||CDKL3||Cyclin-dependent kinase-like 3||	51265	RefSeq	5	5	5q31.1	5q31	-	133671590	133730113
CDKL5	0.962	0.005	1.042	0.01	1.083	0.216259	6792	NM_003159	Hs.435570	Cyclin-dependent kinase-like 5	||STK9||CDKL5||Cyclin-dependent kinase-like 5||SERINE/THREONINE PROTEIN KINASE 9||	6792	RefSeq	X	X	Xp22.13	Xp22	+	18203413	18431402	ATP binding	protein amino acid phosphorylation
CDKN1A	1.096	0.029	1.153	0.002	1.051	-0.0757116	1026	NM_000389	Hs.370771	Cyclin-dependent kinase inhibitor 1A (p21, Cip1)	||SDI1||WAF1||CDKN1A||MDA-6||p21CIP1||CAP20||CDK-interaction protein 1||DNA synthesis inhibitor||CDK-INTERACTING PROTEIN 1||wild-type p53-activated fragment 1||WILDTYPE p53-ACTIVATED FRAGMENT 1||melanoma differentiation associated protein 6||cyclin-dependent kinase inhibitor 1A (p21, Cip1)||	1026	RefSeq	6	6	6p21.31	6p21.2	+	36754464	36763086	cyclin-dependent protein kinase inhibitor activity	cell cycle arrest	nucleus
CDKN1B	1.076	0.035	1.174	0.023	1.09	0.280127	1027	NM_004064	Hs.238990	Cyclin-dependent kinase inhibitor 1B (p27, Kip1)	||CDKN1B||P27KIP1||p27(KIP1)||CDKN4||cyclin-dependent kinase inhibitor 1B (p27, Kip1)||	1027	RefSeq	12	12	12p13.2	12p13.1-p12	+	12761575	12766569	cyclin-dependent protein kinase inhibitor activity	cell cycle arrest	cytoplasm
CDKN1C	1.058	0.008	1.116	0.006	1.054	-0.0483394	1028	NM_000076	Hs.106070	Cyclin-dependent kinase inhibitor 1C (p57, Kip2)	||WBS||p57(KIP2)||BWCR||CDKN1C||BWS||Beckwith-Wiedemann syndrome||cyclin-dependent kinase inhibitor 1C (p57, Kip2)||	1028	RefSeq	11	11	11p15.4	11p15.5	-	2861440	2863537	cyclin-dependent protein kinase inhibitor activity	G1 phase of mitotic cell cycle	nucleus
CDKN2B	1.064	0.018	1.125	0.012	1.057	-0.0209672	1030	NM_004936	Hs.72901	Cyclin-dependent kinase inhibitor 2B (p15, inhibits CDK4)	||p14_INK4B||p15(INK4B)||CDKN2B||TP15||MTS2||p15_INK4B||CDK4B inhibitor||p14_CDK inhibitor||CDK inhibitory protein||p15 CDK inhibitor||multiple tumor suppressor 2||cyclin-dependent kinase 4 inhibitor B||cyclin-dependent kinase inhibitor 2B isoform 1||cyclin-dependent kinase inhibitor 2B isoform 2||cyclin-dependent kinase inhibitor 2B (p15, inhibits CDK4)||cyclin-dependent kinases 4 and 6 binding …	1030	RefSeq	9	9	9p21.3	9p21	-	21992902	21999312	cyclin-dependent protein kinase inhibitor activity	cell cycle	cytoplasm
CDKN2C	1.012	0.028	1.071	0.001	1.058	-0.0118431	1031	NM_001262	Hs.525324	Cyclin-dependent kinase inhibitor 2C (p18, inhibits CDK4)	||OTTHUMP00000046546||p18-INK4C||CDKN2C||p18(INK4C)||cyclin-dependent inhibitor||CDK6 inhibitor p18||cyclin-dependent kinase 6 inhibitor p18||cyclin-dependent kinase 4 inhibitor C||cyclin-dependent kinase inhibitor 2C (p18, inhibits CDK4)||	1031	RefSeq	1	1	1p32.3	1p32	+	51146387	51152326	cyclin-dependent protein kinase inhibitor activity	cell cycle	cytoplasm
CDKN2D	0.931	0.001	0.991	0.009	1.063	0.0337772	1032	NM_001800	Hs.435051	Cyclin-dependent kinase inhibitor 2D (p19, inhibits CDK4)	||CDKN2D||p19-INK4D||p19(INK4D)||CDK inhibitor p19INK4d||inhibitor of cyclin-dependent kinase 4d||cyclin-dependent kinase 4 inhibitor D p19||cell cycle inhibitor, Nur77 associating protein||cyclin-dependent kinase inhibitor 2D (p19, inhibits CDK4)||	1032	RefSeq	19	19	19p13.2	19p13	-	10538138	10540631	cyclin-dependent protein kinase inhibitor activity	cell cycle	cytoplasm
CDKN3	0.863	0.012	0.899	0.019	1.041	-0.166952	1033	NM_005192	Hs.84113	Cyclin-dependent kinase inhibitor 3 (CDK2-associated dual specificity phosphatase)	||CDKN3||CDI1||MGC70625||FLJ25787||CIP2||KAP1||kinase-associated phosphatase||Cdk-associated protein phosphatase||cyclin-dependent kinase interactor 1||cyclin-dependent kinase interacting protein 2||cyclin-dependent kinase inhibitor 3 (CDK2-associated dual specificity phosphatase)||	1033	RefSeq	14	14	14q22.2	14q22	+	53933475	53956682	hydrolase activity	cell cycle
CERK	1.008	0.033	1.05	0.019	1.041	-0.166952	64781	NM_022766	Hs.200668	Ceramide kinase	||CERK||Ceramide kinase||	64781	RefSeq	22	22	22q13.31	22q13.31	-	45400826	45454671	calcium- and calmodulin-dependent protein kinase activity	ceramide metabolism	integral to membrane of membrane fraction
RAPGEF4	0.94	0.007	1.017	0.002	1.081	0.19801	11069	NM_007023	Hs.470646	Rap guanine nucleotide exchange factor (GEF) 4	||RAPGEF4||EPAC2||cAMP-GEFII||cAMP-REGULATED GUANINE NUCLEOTIDE EXCHANGE FACTOR II||Rap guanine nucleotide exchange factor (GEF) 4||	11069	RefSeq	2	2	2q31.1	2q31-q32	+	173426113	173743122	3',5'-cAMP binding	G-protein coupled receptor protein signaling pathway	cAMP-dependent protein kinase complex
CHEK1	0.98	0.032	1.029	0.024	1.05	-0.0848357	1111	NM_001274	Hs.24529	CHK1 checkpoint homolog (S. pombe)	||CHEK1||CELL CYCLE CHECKPOINT KINASE||CHK1 (checkpoint, S.pombe) homolog||CHK1 checkpoint homolog (S. pombe)||Checkpoint, S. pombe, homolog of, 1||	1111	RefSeq	11	11	11q24.2	11q24-q24	+	125001546	125030847	ATP binding	DNA damage checkpoint	condensed nuclear chromosome
CHEK2	1.065	7.293	1.064	0.037	0.998	-0.559287	11200	NM_007194	Hs.291363	CHK2 checkpoint homolog (S. pombe)	||CHEK2||HBCC, SUSCEPTIBILITY TO||CHK2 checkpoint homolog (S. pombe)||RAD53, S. CEREVISIAE, HOMOLOG OF||CHECKPOINT KINASE 2, S. POMBE, HOMOLOG OF||CDS1, S. POMBE, HOMOLOG OF BREAST AND COLORECTAL CANCER, SUSCEPTIBILITY TO||	11200	RefSeq	22	22	22q12.1	22q11	-	27408284	27465251	ATP binding	DNA damage checkpoint	nucleus
CHKA	0.959	0.03	1.043	0.034	1.087	0.252755	1119	NM_001277	Hs.77221	Choline kinase alpha	||CHKA||2.7.1.32||Choline kinase alpha||choline kinase alpha isoform a||choline kinase alpha isoform b||CKI, YEAST, HUMAN COMPLEMENT OF||	1119	RefSeq	11	11	11q13.2	11q13.2	-	67576903	67645434	choline kinase activity	lipid metabolism
CHKB	1.022	0.024	1.088	0.012	1.064	0.0429013	1120	NM_005198	Hs.439777	Carnitine palmitoyltransferase 1B (muscle)	||||CPT1B||Carnitine palmitoyltransferase 1B (muscle)||		RefSeq	22	22	22q13.33	22q13.33	-	49307530	49311538	acyltransferase activity	fatty acid beta-oxidation	integral to membrane
CHRM1	1.015	0.007	1.11	0.017	1.093	0.307499	1128	NM_000738	Hs.247917	Cholinergic receptor, muscarinic 1	||MGC30125||CHRM1||HM1||muscarinic acetylcholine receptor M1||CHOLINERGIC RECEPTOR, MUSCARINIC, 1||ACETYLCHOLINE RECEPTOR, MUSCARINIC, 1||Cholinergic receptor, muscarinic 1||	1128	RefSeq	11	11	11q12.3	11q13	-	62432727	62445588	muscarinic acetylcholine receptor activity	acetylcholine receptor signaling, muscarinic pathway	integral to plasma membrane
CHUK	0.926	0.019	0.961	0.042	1.038	-0.194325	1147	NM_001278	Hs.198998	Conserved helix-loop-helix ubiquitous kinase	||CHUK||IKKA||TCF16||NFKBIKA||IKK-alpha||IKK1||IKBKA||IKK-a kinase||I-kappa-B kinase-alpha||I-kappa-B kinase 1||conserved helix-loop ubiquitous kinase||IkB kinase alpha subunit||Conserved helix-loop-helix ubiquitous kinase||Nuclear factor NFkappaB inhibitor kinase alpha||INHIBITOR OF KAPPA LIGHT POLYPEPTIDE GENE ENHANCER IN B CELLS, KINASE OF, ALPHA||NUCLEAR FACTOR OF KAPPA LIGHT CHAIN GENE ENHAN…	1147	RefSeq	10	10	10q24.31	10q24-q25	-	101938114	101979366	ATP binding	I-kappaB phosphorylation	cytoplasm
CINP	0.937	0.019	0.988	0.03	1.054	-0.0483394	51550	NM_032630	Hs.129634	Cyclin-dependent kinase 2-interacting protein	||CINP||Cyclin-dependent kinase 2-interacting protein||	51550	RefSeq	14	14	14q32.32	14q32.32	-	101884373	101899006	kinase activity
CIT	0.867	0.017	0.973	0.033	1.122	0.572097	11113	NM_007174	Hs.119594	Citron (rho-interacting, serine/threonine kinase 21)	||CIT||CRIK||STK21||CITRON RHO-INTERACTING KINASE||RHO-INTERACTING SERINE/THREONINE KINASE CITRON||SERINE/THREONINE PROTEIN KINASE 21||Citron (rho-interacting, serine/threonine kinase 21)||	11113	RefSeq	12	12	12q24.23	12q24	-	118586317	118777812	ATP binding	intracellular signaling cascade	intracellular
CKB	0.959	0.04	1.047	0.003	1.092	0.298375	1152	NM_001823	Hs.173724	Creatine kinase, brain	||CKB||B-CK||2.7.3.2||CKBB||creatine kinase-B||creatine kinase B-chain||brain creatine kinase||Creatine kinase, brain||CREATINE KINASE, BRAIN TYPE||	1152	RefSeq	14	14	14q32.32	14q32	-	103055748	103058923	creatine kinase activity		cytoplasm
CKM	1.019	0.01	1.115	0.012	1.093	0.307499	1158	NM_001824	Hs.334347	Creatine kinase, muscle	||2.7.3.2||CKMM||CKM||M-CK||creatine kinase-M||muscle creatine kinase||Creatine kinase, muscle||creatine kinase M chain||CREATINE KINASE, MUSCLE TYPE||	1158	RefSeq	19	19	19q13.32	19q13.2-q13.3	-	50501511	50517974	creatine kinase activity		cytoplasm
CKMT1	1.122	0.027	1.171	0.007	1.043	-0.148704	1159	NM_020990	Hs.425633	Creatine kinase, mitochondrial 1A	||||Creatine kinase, mitochondrial 1A||		RefSeq	15	15	15q15.3		+	41673545	41678874
CKMT2	1.025	0.02	1.086	0.008	1.059	-0.00271906	1160	NM_001825	Hs.80691	Creatine kinase, mitochondrial 2 (sarcomeric)	||CKMTS||SMTCK||2.7.3.2||CKMT2||basic-type mitochondrial creatine kinase||CREATINE KINASE, SARCOMERIC MITOCHONDRIAL||Creatine kinase, mitochondrial 2 (sarcomeric)||sarcomeric mitochondrial creatine kinase precursor||	1160	RefSeq	5	5	5q14.1	5q13.3	+	80564937	80597972	creatine kinase activity	generation of precursor metabolites and energy	mitochondrion
CKS1B	1.019	0.043	1.119	0.008	1.098	0.35312	1163	NM_001826	Hs.374378	CDC28 protein kinase regulatory subunit 1B	||PNAS-16||PNAS-18||ckshs1||CKS1B||PNAS-143||CDC2-associated protein CKS1||CDC28 protein kinase 1B||NB4 apoptosis/differentiation related protein||cell division control protein CKS1||CDC28 protein kinase regulatory subunit 1B||	1163	RefSeq	1	1	1q22	1q21.2	+	151760286	151764795	cyclin-dependent protein kinase activity	cell cycle
CKS2	1.06	0.006	1.135	0.018	1.07	0.0976457	1164	NM_001827	Hs.83758	CDC28 protein kinase regulatory subunit 2	||CKS2||CKSHS2||CDC2-ASSOCIATED PROTEIN CKS2||CDC28 protein kinase 2||CKS1(S. cerevisiae Cdc28/Cdc2 kinase subunit) homolog-2||CDC28 protein kinase regulatory subunit 2||	1164	RefSeq	9	9	9q22.2	9q22	+	89155666	89161171	cyclin-dependent protein kinase activity	cell cycle
CLK1	0.929	0.03	0.989	0.02	1.064	0.0429013	1195	NM_004071	Hs.433732	CDC-like kinase 1	||CLK4||CLK/STY||CLK1||2.7.1.37||CDC28/CDC2-LIKE KINASE||CDC-like kinase 1||PROTEIN-TYROSINE KINASE STY||protein tyrosine kinase STY||	1195	RefSeq	2	2	2q33.1	2q33	-	201543310	201554866	ATP binding	cell proliferation	nucleus
CLK2	0.964	0.03	1.057	0.005	1.095	0.325747	1196	NM_001291	Hs.73986	CDC-like kinase 2	||2.7.1.112||2.7.1.37||hCLK2||CLK2||MGC61500||CLK kinase||CDC-like kinase 2||CDC-like kinase 2 isoform 1||CDC-like kinase 2 isoform 2||dual specificity protein kinase CLK2||	1196	RefSeq	1	1	1q22	1q21	-	152045732	152056354	ATP binding	protein amino acid phosphorylation	nucleus
CLK3	0.955	0.001	1.015	0.005	1.062	0.0246531	1198	NM_001292	Hs.511790	CDC-like kinase 3	||CLK3||CDC-like kinase 3||CDC-like kinase 3 isoform hclk3/152||	1198	RefSeq	15	15	15q24.1	15q24	+	72687765	72709511	ATP binding	protein amino acid phosphorylation	nucleus
CLK4	0.917	0.031	0.961	0.034	1.047	-0.112208	57396	NM_020666	Hs.406557	CDC-like kinase 4	||CLK4||CDC-like kinase 4||	57396	RefSeq	5	5	5q35.3	5q35	-	177962271	177986660	ATP binding	protein amino acid phosphorylation	nucleus
PLK3	0.695	0.032	0.832	0.085	1.197	1.2564	1263	NM_004073	Hs.153640	Polo-like kinase 3 (Drosophila)	||FNK||PLK3||CNK||PRK||2.7.1.37||FGF-inducible kinase||cytokine-inducible kinase||proliferation-related kinase||polo-like kinase 3 (Drosophila)||	1263	RefSeq	1	1	1p34.1	1p34.1	+	44935128	44940759	ATP binding	protein amino acid phosphorylation
CNKSR1	0.798	0.049	0.946	0.077	1.186	1.15604	10256	NM_006314	Hs.16232	Connector enhancer of kinase suppressor of Ras 1	||CNK1||CNKSR1||CNK, DROSOPHILA, HOMOLOG OF||CONNECTOR ENHANCER OF KSR, DROSOPHILA, HOMOLOG OF||connector enhancer of kinase suppressor of Ras 1||	10256	RefSeq	1	1	1p36.11	1p36.11	+	26188144	26200515	protein binding	transmembrane receptor protein tyrosine kinase signaling pathway	intercellular junction
COL4A3BP	0.594	0.021	0.867	0.078	1.46	3.65603	10087	NM_005713	Hs.270437	Collagen, type IV, alpha 3 (Goodpasture antigen) binding protein	||COL4A3BP||GPBP||GOODPASTURE ANTIGEN-BINDING PROTEIN||COLLAGEN, TYPE IV, ALPHA-3 BINDING PROTEIN||collagen, type IV, alpha 3 (Goodpasture antigen) binding protein||	10087	RefSeq	5	5	5q13.3	5q13.3	-	74710820	74843196	protein serine/threonine kinase activity	immune response	cellular component unknown
COPB2	0.557	0.031	0.798	0.1	1.433	3.40968	9276	NM_004766	Hs.75724	Coatomer protein complex, subunit beta 2 (beta prime)	||COPB2||BETA-PRIME COP||BETA-2 COAT PROTEIN||COATOMER PROTEIN COMPLEX, SUBUNIT BETA-2||Coatomer protein complex, subunit beta 2 (beta prime)||	9276	RefSeq	3	3	3q23	3q23	-	140559132	140591159	protein transporter activity	intra-Golgi transport	COPI vesicle coat
CRK7	0.818	0.051	0.888	0.065	1.086	0.243631	51755	NM_016507	Hs.416108	CDC2-related protein kinase 7	||CRK7||CDC2-related protein kinase 7||	51755	RefSeq	17	17	17q12	17q12	+	34871817	34942044	ATP binding	autophosphorylation	nucleus
CRKL	1.041	0.014	1.11	0.106	1.066	0.0611494	1399	NM_005207	Hs.5613	V-crk sarcoma virus CT10 oncogene homolog (avian)-like	||CRKL||ONCOGENE CRKL||v-crk sarcoma virus CT10 oncogene homolog (avian)-like||v-crk avian sarcoma virus CT10 oncogene homolog-like||	1399	RefSeq	22	22	22q11.21	22q11	+	19596267	19632443	SH3/SH2 adaptor activity	JNK cascade
CSF1R	0.99	0.029	1.023	0.062	1.033	-0.239945	1436	NM_005211	Hs.553489	Colony stimulating factor 1 receptor, formerly McDonough feline sarcoma viral (v-fms) oncogene homolog	||C-FMS||FIM2||2.7.1.112||CSF1R||CSFR||CD115 antigen||FMS proto-oncogene||ONCOGENE FMS||COLONY-STIMULATING FACTOR 1 RECEPTOR||macrophage colony stimulating factor I receptor||colony stimulating factor 1 receptor precursor||colony stimulating factor 1 receptor, formerly McDonough feline sarcoma viral (v-fms) oncogene homolog||V-FMS MCDONOUGH FELINE SARCOMA VIRAL ONCOGENE HOMOLOG, FORMERLY FRIEND M…	1436	RefSeq	5	5	5q32	5q33-q35	-	149413050	149473128	ATP binding	antimicrobial humoral response (sensu Vertebrata)	integral to plasma membrane
CSK	1.178	0.007	1.06	0.069	0.899	-1.46257	1445	NM_004383	Hs.77793	C-src tyrosine kinase	||CSK||2.7.1.112||c-SRC TYROSINE KINASE||CYTOPLASMIC TYROSINE KINASE||	1445	RefSeq	15	15	15q24.1	15q23-q25	+	72861767	72882557	ATP binding	intracellular signaling cascade	cytoplasm
CSNK1A1	1.031	0.012	1.042	0.055	1.011	-0.440674	1452	NM_001892	Hs.442592	Casein kinase 1, alpha 1	||2.7.1.-||PRO2975||CSNK1A1||CK1||HLCDGP1||CASEIN KINASE I, ALPHA-1||down-regulated in lung cancer||Casein kinase 1, alpha 1||	1452	RefSeq	5	5	5q32	5q32	-	148855741	148910850	ATP binding	Wnt receptor signaling pathway
CSNK1D	0.855	0.025	1.02	0.075	1.192	1.21078	1453	NM_001893	Hs.477070	Casein kinase 1, delta	||2.7.1.-||CSNK1D||HCKID||CASEIN KINASE I, DELTA||Casein kinase 1, delta||casein kinase 1, delta isoform 2||casein kinase 1, delta isoform 1||	1453	RefSeq	17	17	17q25.3	17q25	-	77795530	77824862	ATP binding	DNA repair
CSNK1E	0.746	0.056	0.939	0.012	1.259	1.82209	1454	NM_001894	Hs.474833	Casein kinase 1, epsilon	||OTTHUMP00000063258||CKI-epsilon||HCKIE||CSNK1E||OTTHUMP00000063263||MGC10398||CASEIN KINASE I, EPSILON||casein kinase 1 epsilon||casein kinase I epsilon||Casein kinase 1, epsilon||	1454	RefSeq	22	22	22q13.1	22q13.1	-	37011197	37038589	ATP binding	DNA repair
CSNK1G1	0.858	0.009	0.936	0.026	1.09	0.280127	53944	NM_022048	Hs.254335	Casein kinase 1, gamma 1	||CSNK1G1||CASEIN KINASE I, GAMMA-1||Casein kinase 1, gamma 1||	53944	RefSeq	15	15	15q22.31	15q22.1-q22.31	-	62250880	62379879	ATP binding	Wnt receptor signaling pathway
CSNK1G2	0.877	0.053	0.78	0.005	0.889	-1.55381	1455	NM_001319	Hs.181390	Casein kinase 1, gamma 2	||CK1g2||CSNK1G2||CASEIN KINASE I, GAMMA-2||Casein kinase 1, gamma 2||	1455	RefSeq	19	19	19p13.3	19p13.3	+	1920718	1932334	ATP binding	Wnt receptor signaling pathway
CSNK1G3	0.741	0.029	0.904	0.028	1.22	1.46626	1456	NM_004384	Hs.129206	Casein kinase 1, gamma 3	||CSNK1G3||CASEIN KINASE I, GAMMA-3||Casein kinase 1, gamma 3||	1456	RefSeq	5	5	5q23.2	5q23	+	122909226	122979039	ATP binding	Wnt receptor signaling pathway
CSNK2A1	1.048	0.064	1.061	0.007	1.012	-0.43155	1457	NM_001895	Hs.446484	Casein kinase 2, alpha 1 polypeptide	||||CSNK2A1||Casein kinase 2, alpha 1 polypeptide||		RefSeq	20	20	20p13	20p13	-	411337	472482	ATP binding	protein amino acid phosphorylation
CSNK2A2	0.779	0.051	0.848	0.012	1.089	0.271003	1459	NM_001896	Hs.82201	Casein kinase 2, alpha prime polypeptide	||CSNK2A2||2.7.1.37||CSNK2A1||CK2A2||CASEIN KINASE II, ALPHA-2||CASEIN KINASE II, ALPHA-PRIME SUBUNIT||Casein kinase 2, alpha prime polypeptide||	1459	RefSeq	16	16	16q21	16p13.3-p13.2	-	56749314	56789283	ATP binding	Wnt receptor signaling pathway
CSNK2B	0.559	0.081	0.825	0.011	1.475	3.79289	1460	NM_001320	Hs.73527	Casein kinase 2, beta polypeptide	||CK2N||CSK2B||2.7.1.37||CK2B||CSNK2B||alternative name: G5a, phosvitin||Casein kinase II beta subunit||CASEIN KINASE II, BETA SUBUNIT||Casein kinase 2, beta polypeptide||	1460	RefSeq	6	6	6p21.33	6p21-p12	+	31741635	31745822	kinase activity	Wnt receptor signaling pathway	protein kinase CK2 complex
CXCL10	1	0.035	0.969	0.063	0.969	-0.823885	3627	NM_001565	Hs.413924	Chemokine (C-X-C motif) ligand 10	||IP10||INP10||CXCL10||SCYB10, FORMERLY||INTERFERON-GAMMA-INDUCED FACTOR||INTERFERON-GAMMA-INDUCIBLE PROTEIN 10||MOB1, MOUSE, HOMOLOG OF||CHEMOKINE, CXC MOTIF, LIGAND 10||chemokine (C-X-C motif) ligand 10||SMALL INDUCIBLE CYTOKINE SUBFAMILY B, MEMBER 10, FORMERLY||	3627	RefSeq	4	4	4q21.1	4q21	-	77299451	77301829	cAMP-dependent protein kinase regulator activity	cell motility	extracellular region
DAPK1	0.806	0.051	0.88	0.045	1.091	0.289251	1612	NM_004938	Hs.380277	Death-associated protein kinase 1	||2.7.1.-||DKFZp781I035||DAPK1||Death-associated protein kinase 1||	1612	RefSeq	9	9	9q21.33	9q34.1	+	87342349	87553097	ATP binding	apoptosis	actin cytoskeleton
DAPK2	0.836	0.024	0.923	0.045	1.103	0.39874	23604	NM_014326	Hs.237886	Death-associated protein kinase 2	||DAPK2||Death-associated protein kinase 2||	23604	RefSeq	15	15	15q22.31	15q22.31	-	61986288	62125574	ATP binding	apoptosis	cytoplasm
DAPK3	0.859	0.04	0.946	0.045	1.101	0.380492	1613	NM_001348	Hs.233308	Death-associated protein kinase 3	||ZIPK||DAPK3||ZIP KINASE||Death-associated protein kinase 3||	1613	RefSeq	19	19	19p13.3	19p13.3	-	3909451	3920826	ATP binding	apoptosis	nucleus
DCAMKL1	0.833	0.05	0.971	0.012	1.166	0.973556	9201	NM_004734	Hs.507755	Doublecortin and CaM kinase-like 1	||DCAMKL1||DOUBLECORTIN- AND CALMODULIN KINASE-LIKE 1||doublecortin and CaM kinase-like 1||	9201	RefSeq	13	13	13q13.3	13q13	-	35243477	35603443	ATP binding	cell differentiation	integral to plasma membrane
DCK	0.78	0.072	0.9	0.058	1.154	0.864068	1633	NM_000788	Hs.709	Deoxycytidine kinase	||DCK||2.7.1.74||Deoxycytidine kinase||	1633	RefSeq	4	4	4q13.3	4q13.3-q21.1	+	72224426	72261648	ATP binding	nucleobase, nucleoside, nucleotide and nucleic acid metabolism	nucleus
DDR1	0.96	0.019	1.041	3.332	1.084	0.225383	780	NM_001954	Hs.520004	Discoidin domain receptor family, member 1	||NTRK4||TRKE||2.7.1.112||MCK10||RTK6||EDDR1||CAK||DDR1||CD167||neuroepithelial tyrosine kinase||EPITHELIAL-SPECIFIC RECEPTOR KINASE||cell adhesion kinase||discoidin domain receptor DDR1d||RECEPTOR TYROSINE KINASE NEP||mammarian carcinoma kinase 10||TYROSINE KINASE RECEPTOR E||PTK3, MOUSE, HOMOLOG OF||PTK3A protein tyrosine kinase 3A||epithelial discoidin domain receptor 1||discoidin receptor tyr…	780	RefSeq	6	6	6p21.33	6p21.3	+	30959839	30975910	ATP binding	cell adhesion	integral to plasma membrane
DDR2	0.993	0.053	1.094	0.014	1.101	0.380492	4921	NM_006182	Hs.275757	Discoidin domain receptor family, member 2	||TKT||NTRKR3||DDR2||NEUROTROPHIC TYROSINE KINASE RECEPTOR-RELATED 3||Discoidin domain receptor family, member 2||TYROSINE KINASE RECEPTOR RELATED TO NEUROTROPHIC TRK||	4921	RefSeq	1	1	1q23.3	1q12-q23	+	159333917	159481869	ATP binding	cell adhesion	integral to plasma membrane
DGKA	1.083	0	1.198	0.034	1.105	0.416988	1606	NM_001345	Hs.524488	Diacylglycerol kinase, alpha 80kDa	||DGK-alpha||MGC42356||DAGK1||DGKA||2.7.1.107||MGC12821||DAGK, 80-KD||diacylglycerol kinase, alpha (80kD)||diacylglycerol kinase, alpha 80kDa||DIACYLGLYCEROL KINASE, ALPHA, 80-KD||	1606	RefSeq	12	12	12q13.2	12q13.3	+	54611212	54634072	calcium ion binding	intracellular signaling cascade	cellular component unknown
DGKB	0.864	0.065	0.934	0.044	1.081	0.19801	1607	NM_004080	Hs.487619	Diacylglycerol kinase, beta 90kDa	||2.7.1.107||DGK-BETA||DGKB||KIAA0718||DAGK2||DGK, 90-KD||DIACYLGLYCEROL KINASE, BETA, 90-KD||diacylglycerol kinase, beta (90kD)||diacylglycerol kinase, beta 90kDa||diacylglycerol kinase, beta isoform 2||diacylglycerol kinase, beta isoform 1||	1607	RefSeq	7	7	7p21.2	7p21.3	-	13960484	14654128	calcium ion binding	intracellular signaling cascade
DGKD	0.874	0.005	0.914	0.007	1.045	-0.130456	8527	NM_003648	Hs.471675	Diacylglycerol kinase, delta 130kDa	||DGKD||DGK-DELTA||DGK ISOZYME, 130-KD||diacylglycerol kinase, delta 130kDa||DIACYLGLYCEROL KINASE, DELTA, 130-KD||	8527	RefSeq	2	2	2q37.1	2q37.1	+	234078799	234162743	diacylglycerol binding	cell growth	cytoplasm
DGKE	1.227	0.026	1.088	0.041	0.887	-1.57206	8526	NM_003647	Hs.239514	Diacylglycerol kinase, epsilon 64kDa	||DGKE||DGK-EPSILON||diacylglycerol kinase, epsilon 64kDa||DIACYLGLYCEROL KINASE, EPSILON, 64-KD||	8526	RefSeq	17	17	17q23.2	17q22	+	52266551	52295922	ATP binding	intracellular signaling cascade	integral to membrane
DGKG	0.744	0.022	0.88	0.02	1.182	1.11954	1608	NM_001346	Hs.171499	Diacylglycerol kinase, gamma 90kDa	||DAGK3||MGC104993||DGK-GAMMA||DGKG||2.7.1.107||DAGK, 90-KD||diacylglycerol kinase, gamma 90kDa||diacylglycerol kinase, gamma (90kD)||DIACYLGLYCEROL KINASE, GAMMA, 90-KD||	1608	RefSeq	3	3	3q27.2	3q27-q28	-	187349713	187562705	calcium ion binding	intracellular signaling cascade
DGKI	0.959	0.054	1.047	0.035	1.091	0.289251	9162	NM_004717	Hs.242947	Diacylglycerol kinase, iota	||||DGKI||Diacylglycerol kinase, iota||		RefSeq	7	7	7q33	7q32.3-q33	-	136531639	136988864	diacylglycerol kinase activity	intracellular signaling cascade	cytoplasm
DGKQ	1.213	0.022	1.156	0.02	0.952	-0.978994	1609	NM_001347	Hs.17946	Diacylglycerol kinase, theta 110kDa	||DAGK7||2.7.1.107||DGKQ||DAGK4, FORMERLY||DGK-DELTA, FORMERLY||diacylglycerol kinase (110kD)||diacylglycerol kinase, theta 110kDa||diacylglycerol kinase, delta (110kD)||DIACYLGLYCEROL KINASE, THETA, 110-KD||diacylglycerol kinase, theta (110kD)||DIACYLGLYCEROL KINASE, DELTA, 110-KD, FORMERLY||	1609	RefSeq	4	4	4p16.3	4p16.3	-	942505	957174	diacylglycerol binding	intracellular signaling cascade
DGKZ	0.924	0.02	1.089	0.043	1.178	1.08305	8525	NM_003646	Hs.502461	Diacylglycerol kinase, zeta 104kDa	||DGK-ZETA||DGKZ||diacylglycerol kinase, zeta 104kDa||DIACYLGLYCEROL KINASE, ZETA, 104-KD: DGKZ||	8525	RefSeq	11	11	11p11.2	11p11.2	+	46325594	46358680	ATP binding	intracellular signaling cascade	nucleus
DGUOK	1.111	0.07	1.198	0.02	1.078	0.170638	1716	NM_001929	Hs.469022	Deoxyguanosine kinase	||dGK||2.7.1.113||DGUOK||Deoxyguanosine kinase||DEOXYGUANOSINE KINASE, MITOCHONDRIAL||deoxyguanosine kinase isoform d precursor||deoxyguanosine kinase isoform b precursor||deoxyguanosine kinase isoform a precursor||deoxyguanosine kinase isoform c precursor||	1716	RefSeq	2	2	2p13.1	2p13	+	74065607	74097743	ATP binding	guanosine metabolism	mitochondrion
DKFZP434C131	0.702	0.061	0.961	0.046	1.367	2.80749	25989	XM_044630
DKFZp434C1418	0.658	0.013	0.906	0.013	1.376	2.88961	285220	NM_173655
DKFZP586B1621	1.04	0.055	1.078	0.014	1.036	-0.212573	26007	NM_015533	Hs.6278	DKFZP586B1621 protein	||DKFZP586B1621||DKFZP586B1621 protein||	26007	RefSeq	11	11	11q12.2	11q12.2	+	60858725	60870967	glycerone kinase activity	glycerol metabolism
DKFZP761P0423	0.656	0.026	0.885	0.022	1.347	2.62501	157285	XM_291277	Hs.29068	Hypothetical protein DKFZp761P0423	||DKFZp761P0423||hypothetical protein DKFZp761P0423||	157285			8		8p23.1				ATP binding	protein amino acid phosphorylation
STYK1	0.882	0.001	1.103	0.046	1.249	1.73085	55359	NM_018423	Hs.24979	Serine/threonine/tyrosine kinase 1	||STYK1||Serine/threonine/tyrosine kinase 1||	55359	RefSeq	12	12	12p13.2	12p13.2	-	10662804	10717906	ATP binding	protein amino acid phosphorylation	integral to membrane
DLG1	0.77	0.003	0.898	0	1.165	0.964432	1739	NM_004087	Hs.292549	DKFZP586B0319 protein	||||DLG1||DKFZP586B0319 protein||		RefSeq	3	3	3q29	3q29	-	198259732	198513757	cytoskeletal protein binding		cytoplasm
DLG2	1.026	0.001	1.132	0.006	1.102	0.389616	1740	NM_001364	Hs.215839	Discs, large homolog 2, chapsyn-110 (Drosophila)	||PSD-93||DKFZp781E0954||DLG2||DKFZp781D1854||discs large homolog 2||CHANNEL-ASSOCIATED PROTEIN OF SYNAPSES, 110-KD||channel-associated protein of synapses, 110kDa||DISCS LARGE, DROSOPHILA, HOMOLOG OF, 2||discs, large homolog 2, chapsyn-110 (Drosophila)||discs, large (Drosophila) homolog 2 (chapsyn-110) (NOTE: redefinition of symbol)||	1740	RefSeq	11	11	11q14.1	11q21	-	82848326	84312086	guanylate kinase activity		membrane
DLG3	0.922	0.024	1.022	0.022	1.108	0.44436	1741	NM_021120	Hs.522680	Discs, large homolog 3 (neuroendocrine-dlg, Drosophila)	||NEDLG||KIAA1232||MRX||DLG3||NEUROENDOCRINE DLG||synapse-associated protein 102||discs large homolog 3||discs, large homolog 3 (neuroendocrine-dlg, Drosophila)||discs, large (Drosophila) homolog 3 (neuroendocrine-dlg)||SAP102 MENTAL RETARDATION, X-LINKED NONSYNDROMIC, DLG3-RELATED||DISCS LARGE, DROSOPHILA, HOMOLOG OF, 3||bA291O7.3 (discs, large Drosophila homolog 3 (neuroendocrine-dlg) )||	1741	RefSeq	X	X	Xq13.1	Xq13.1	+	69447839	69505554	guanylate kinase activity	negative regulation of cell proliferation	cellular component unknown
DLG4	0.635	0.034	0.838	0.156	1.319	2.36954	1742	NM_001365	Hs.463928	Discs, large homolog 4 (Drosophila)	||DLG4||SAP90||PSD95||POSTSYNAPTIC DENSITY 95||synapse-associated protein 90||discs large homolog 4||postsynaptic density protein 95||discs, large homolog 4 (Drosophila)||DISCS LARGE, DROSOPHILA, HOMOLOG OF, 4||discs, large (Drosophila) homolog 4 (NOTE: redefinition of symbol)||	1742	RefSeq	17	17	17p13.1	17p13.1	-	7033935	7063745	guanylate kinase activity	learning
DMPK	0.939	0.004	1.153	0.02	1.227	1.53012	1760	NM_004409	Hs.546249	Dystrophia myotonica-protein kinase	||2.7.1.-||DMPK||DMK||DM1PK||MYOTONIN-PROTEIN KINASE||DM KINASE||DM PROTEIN KINASE||dystrophia myotonica 1||Dystrophia myotonica-protein kinase||myotonic dystrophy protein kinase||DYSTROPHIA MYOTONICA PROTEIN KINASE||	1760	RefSeq	19	19	19q13.32	19q13.3	-	50964815	50977576	ATP binding	muscle contraction
DNAJC3	0.634	0.018	0.849	0.036	1.339	2.55202	5611	NM_006260	Hs.59214	DnaJ (Hsp40) homolog, subfamily C, member 3	||||DNAJC3||DnaJ (Hsp40) homolog, subfamily C, member 3||		RefSeq	13	13	13q32.1	13q32	+	95127483	95241285	binding	defense response	cytoplasm
DOK1	0.843	0.008	0.914	0.011	1.083	0.216259	1796	NM_001381	Hs.103854	Docking protein 1, 62kDa (downstream of tyrosine kinase 1)	||DOK1||p62DOK||DOCKING PROTEIN, 62-KD||docking protein 1 (downstream of tyrosine kinase 1)||docking protein 1, 62kDa (downstream of tyrosine kinase 1)||docking protein 1, 62kD (downstream of tyrosine kinase 1)||	1796	RefSeq	2	2	2p13.1	2p13	+	74693514	74696317	insulin receptor binding	cell surface receptor linked signal transduction
DTYMK	0.777	0.004	0.92	0.032	1.183	1.12867	1841	NM_012145	Hs.471873	Deoxythymidylate kinase (thymidylate kinase)	||TMPK||DTYMK||2.7.4.9||CDC8||Deoxythymidylate kinase (thymidylate kinase)||	1841	RefSeq	2	2	2q37.3	2q37.3	-	242335146	242346217	ATP binding	DNA metabolism
DUSP1	0.796	0.016	0.929	0.017	1.167	0.98268	1843	NM_004417	Hs.171695	Dual specificity phosphatase 1	||PTPN10||3.1.3.48||CL100||MKP1||MKP-1||DUSP1||3.1.3.16||HVH1||DUAL-SPECIFICITY PHOSPHATASE 1||Dual specificity phosphatase 1||PROTEIN-TYROSINE PHOSPHATASE, NONRECEPTOR-TYPE, 10||MAP KINASE PHOSPHATASE 1||serine/threonine specific protein phosphatase||	1843	RefSeq	5	5	5q35.1	5q34	-	172127706	172130809	MAP kinase phosphatase activity	cell cycle
DUSP10	0.866	0.033	1.076	0.006	1.241	1.65786	11221	NM_007207	Hs.497822	Dual specificity phosphatase 10	||MKP5||DUSP10||DUAL-SPECIFICITY PHOSPHATASE 10||MAP KINASE PHOSPHATASE 5||Dual specificity phosphatase 10||	11221	RefSeq	1	1	1q41	1q41	-	218263160	218303856	MAP kinase phosphatase activity	JNK cascade	cytoplasm
DUSP2	0.844	0.027	0.907	0.019	1.074	0.134142	1844	NM_004418	Hs.1183	Dual specificity phosphatase 2	||PAC1||PAC-1||3.1.3.48||DUSP2||3.1.3.16||Dual-specificity phosphatase 2||Dual specificity phosphatase 2||serine/threonine specific protein phosphatase||PHOSPHATASE OF ACTIVATED CELLS 1||	1844	RefSeq	2	2	2q11.2	2q11	-	96230790	96233053	MAP kinase phosphatase activity	inactivation of MAPK	nucleus
DUSP22	1.048	0.101	1.213	0.019	1.158	0.900564	56940	NM_020185	Hs.29106	Dual specificity phosphatase 22	||DUSP22||Dual specificity phosphatase 22||	56940	RefSeq	6	6	6p25.3	6p25.3	+	237100	296353	kinase activity	apoptosis
DUSP4	1.155	0.027	0.969	0.025	0.839	-2.01001	1846	NM_001394	Hs.417962	Dual specificity phosphatase 4	||TYP||3.1.3.48||MKP2||MKP-2||HVH2||DUSP4||3.1.3.16||DUAL-SPECIFICITY PHOSPHATASE 4||Dual specificity phosphatase 4||VH1 homologous phosphatase 2||MAP kinase phosphatase 2||serine/threonine specific protein phosphatase||dual specificity phosphatase 4 isoform 1||dual specificity phosphatase 4 isoform 2||	1846	RefSeq	8	8	8p12	8p12-p11	-	29249538	29264104	MAP kinase phosphatase activity	MAPKKK cascade	nucleus
DUSP5	0.758	0.038	0.942	0.085	1.243	1.67611	1847	NM_004419	Hs.2128	Dual specificity phosphatase 5	||DUSP5||HVH3||3.1.3.48||3.1.3.16||VH1-like phosphatase 3||DUAL-SPECIFICITY PHOSPHATASE 5||Dual specificity phosphatase 5||serine/threonine specific protein phosphatase||	1847	RefSeq	10	10	10q25.2	10q25	+	112247665	112261285	MAP kinase phosphatase activity	protein amino acid dephosphorylation	nucleus
DUSP6	0.874	0.078	0.99	0.024	1.132	0.663338	1848	NM_001946	Hs.298654	Dual specificity phosphatase 6	||3.1.3.48||PYST1||MKP3||3.1.3.16||DUSP6||DUAL-SPECIFICITY PHOSPHATASE 6||Dual specificity phosphatase 6||MAP kinase phosphatase 3||serine/threonine specific protein phosphatase||dual specificity phosphatase 6 isoform a||dual specificity phosphatase 6 isoform b||	1848	RefSeq	12	12	12q21.33	12q22-q23	-	88244306	88248764	MAP kinase phosphatase activity	inactivation of MAPK	cytoplasm
DUSP7	0.989	0.07	1.1	0.05	1.112	0.480857	1849	XM_037430
DUSP8	1.1	0.079	1.173	0.004	1.065	0.0520254	1850	NM_004420	Hs.41688	Dual specificity phosphatase 8	||HVH5||3.1.3.48||HVH8||HVH-5||HB5||DUSP8||3.1.3.16||DUAL-SPECIFICITY PHOSPHATASE 8||Dual specificity phosphatase 8||M3/6, MOUSE, HOMOLOG OF||serine/threonine specific protein phosphatase||H1 phosphatase, vaccinia virus homolog||H1 PHOSPHATASE, VACCINIA VIRUS, HOMOLOG OF||	1850	RefSeq	11	11	11p15.5	11p15.5	-	1533958	1549726	MAP kinase phosphatase activity	inactivation of MAPK	cytoplasm
DYRK1A	0.924	0.048	1.08	0.04	1.168	0.991804	1859	NM_001396	Hs.368240	Dual-specificity tyrosine-(Y)-phosphorylation regulated kinase 1A	||2.7.1.-||DYRK1A||MNBH||serine/threonine-specific protein kinase||MNB/DYRK protein kinase||serine/threonine kinase MNB||minibrain (Drosophila) homolog||MNB PROTEIN KINASE, SERINE/THREONINE-SPECIFIC||dual specificity YAK1-related kinase||protein kinase minibrain homolog||MINIBRAIN, DROSOPHILA, HOMOLOG OF||dual-specificity tyrosine-(Y)-phosphorylation regulated kinase 1A||DUAL-SPECIFICITY TYROSINE…	1859	RefSeq	21	21	21q22.13	21q22.13	+	37714471	37809347	ATP binding	neurogenesis	nucleus
DYRK1B	1.095	0.008	1.245	0.023	1.137	0.708958	9149	NM_004714	Hs.130988	Dual-specificity tyrosine-(Y)-phosphorylation regulated kinase 1B	||MIRK||DYRK1B||MINIBRAIN-RELATED KINASE||dual-specificity tyrosine-(Y)-phosphorylation regulated kinase 1B||DUAL-SPECIFICITY TYROSINE PHOSPHORYLATION-REGULATED KINASE 1B||	9149	RefSeq	19	19	19q13.2	19q12-13.1	-	45007830	45016681	ATP binding	positive regulation of transcription, DNA-dependent	nucleus
DYRK2	0.92	0.021	1.024	0.033	1.112	0.480857	8445	NM_003583	Hs.173135	Dual-specificity tyrosine-(Y)-phosphorylation regulated kinase 2	||DYRK2||DUAL-SPECIFICITY TYROSINE PHOSPHORYLATION-REGULATED KINASE 2||dual-specificity tyrosine-(Y)-phosphorylation regulated kinase 2||	8445	RefSeq	12	12	12q15	12q15	+	66329020	66340410	ATP binding	protein amino acid phosphorylation	cytoplasm
DYRK3	0.748	0.016	0.894	0.008	1.194	1.22903	8444	NM_003582	Hs.164267	Dual-specificity tyrosine-(Y)-phosphorylation regulated kinase 3	||DYRK3||DUAL-SPECIFICITY TYROSINE PHOSPHORYLATION-REGULATED KINASE 3||dual-specificity tyrosine-(Y)-phosphorylation regulated kinase 3||	8444	RefSeq	1	1	1q32.1	1q32.1	+	203197295	203210932	ATP binding	protein amino acid phosphorylation
DYRK4	1.011	0.122	1.012	0.079	1.001	-0.531915	8798	NM_003845	Hs.439530	Dual-specificity tyrosine-(Y)-phosphorylation regulated kinase 4	||DYRK4||DUAL-SPECIFICITY TYROSINE PHOSPHORYLATION-REGULATED KINASE 4||dual-specificity tyrosine-(Y)-phosphorylation regulated kinase 4||	8798	RefSeq	12	12	12p13.32	12p13.32	+	4569504	4593301	ATP binding	protein amino acid phosphorylation	cellular component unknown
EDN2	0.805	0.009	0.99	0.012	1.229	1.54837	1907	NM_001956	Hs.1407	Endothelin 2	||ET2||EDN2||Endothelin 2||	1907	RefSeq	1	1	1p34.2	1p34	-	41613539	41619390	growth factor activity	cell-cell signaling	extracellular region
EEF2K	0.749	0.04	1.02	0.034	1.361	2.75275	29904	NM_013302	Hs.549151	Similar to NAD(P) dependent steroid dehydrogenase-like	||||EEF2K||Similar to NAD(P) dependent steroid dehydrogenase-like||		RefSeq	16	16	16p12.1	16p12.1	+	22125256	22205452	ATP binding	protein amino acid phosphorylation	cytoplasm
EGFR	1.127	0.015	1.132	0.001	1.005	-0.495419	1956	NM_005228	Hs.488293	Epidermal growth factor receptor (erythroblastic leukemia viral (v-erb-b) oncogene homolog, avian)	||S7||EGFR||2.7.1.112||mENA||ONCOGENE ERBB||ERBB1 SPECIES ANTIGEN 7||truncated epidermal growth factor receptor||epidermal growth factor receptor isoform c||epidermal growth factor receptor isoform d||epidermal growth factor receptor isoform a||epidermal growth factor receptor isoform b||V-ERB-B AVIAN ERYTHROBLASTIC LEUKEMIA VIRAL ONCOGENE HOMOLOG||Epidermal growth factor receptor (erythroblastic…	1956	RefSeq	7	7	7p11.2	7p12	+	54860933	55049239	ATP binding	cell cycle	cytoskeleton
EIF2AK3	0.903	0.04	1.033	0.03	1.143	0.763703	9451	NM_004836	Hs.434326	Eukaryotic translation initiation factor 2-alpha kinase 3	||PERK||HRI||PEK||EIF2AK3||PANCREATIC EIF2-ALPHA KINASE||Eukaryotic translation initiation factor 2-alpha kinase 3||	9451	RefSeq	2	2	2p11.2	2p12	-	88695522	88766356	ATP binding	protein amino acid phosphorylation	endoplasmic reticulum
EIF2AK4	0.961	0.037	1.032	0.026	1.074	0.134142	27104	XM_031612
EKI1	0.738	0.021	0.919	0.032	1.246	1.70348	55500	NM_018638	Hs.240056	Ethanolamine kinase 1	||ETNK1||Ethanolamine kinase 1||	55500	RefSeq	12	12	12p12.1	12p12.1	+	22669275	22729910	ethanolamine kinase activity	phosphatidylethanolamine biosynthesis	cytoplasm
RAPGEF3	0.838	0.053	0.987	0	1.177	1.07392	10411	NM_006105	Hs.8578	Rap guanine nucleotide exchange factor (GEF) 3	||EPAC||RAPGEF3||cAMP-GEFI||EXCHANGE PROTEIN ACTIVATED BY cAMP||RAP GUANINE NUCLEOTIDE EXHANGE FACTOR 3||cAMP-REGULATED GUANINE NUCLEOTIDE EXCHANGE FACTOR I||Rap guanine nucleotide exchange factor (GEF) 3||	10411	RefSeq	12	12	12q13.11	12q13.1	-	46417293	46438822	3',5'-cAMP binding	cell proliferation	cAMP-dependent protein kinase complex
EPHA1	0.993	0.059	1.093	0.032	1.1	0.371368	2041	NM_005232	Hs.89839	EPH receptor A1	||2.7.1.112||EPHA1||EPHT1||oncogene EPH||EPHRIN RECEPTOR EphA1||EPH receptor A1||ephrin type-A receptor 1||RECEPTOR TYROSINE KINASE EPH||tyrosine-protein kinase receptor EPH||eph tyrosine kinase 1||EPH TYROSINE KINASE/ERYTHROPOIETIN-PRODUCING HEPATOMA AMPLIFIED SEQUENCE||	2041	RefSeq	7	7	7q34	7q34	-	142605041	142622822	ATP binding	protein amino acid phosphorylation	integral to plasma membrane
EPHA2	0.771	0.015	0.952	0.017	1.234	1.59399	1969	NM_004431	Hs.171596	EPH receptor A2	||ECK||2.7.1.112||EPHA2||EPHRIN RECEPTOR EphA2||EPH receptor A2||EPITHELIAL CELL RECEPTOR PROTEIN-TYROSINE KINASE||epithelial cell receptor protein tyrosine kinase||receptor protein tyrosine kinase regulated by p53 and E2F-1||	1969	RefSeq	1	1	1p36.13	1p36	-	16196138	16227870	ATP binding	development	integral to plasma membrane
EPHA3	0.873	0.026	0.997	0.016	1.142	0.754579	2042	NM_005233	Hs.123642	EPH receptor A3	||HEK4||EPHA3||ETK1||2.7.1.112||EPH receptor A3||eph-like tyrosine kinase 1||RECEPTOR TYROSINE KINASE HEK||human embryo kinase 1||TYRO4 protein tyrosine kinase||ephrin receptor EphA3 isoform b precursor||ephrin receptor EphA3 isoform a precursor||	2042	RefSeq	3	3	3p11.1	3p11.2	+	89239363	89613972	ATP binding	protein amino acid phosphorylation	integral to plasma membrane
EPHA4	0.814	0.032	0.904	0.032	1.11	0.462608	2043	NM_004438	Hs.371218	EPH receptor A4	||2.7.1.112||EPHA4||EPHRIN RECEPTOR EphA4||EPH receptor A4||ephrin type-A receptor 4||SEK, MOUSE, HOMOLOG OF||tyrosine-protein kinase receptor SEK||TYRO1 protein tyrosine kinase||receptor protein-tyrosine kinase HEK8||	2043	RefSeq	2	2	2q36.1	2q36.1	-	222108253	222262515	ATP binding	protein amino acid phosphorylation	integral to plasma membrane
EPHA5	0.921	0.038	0.958	0.025	1.04	-0.176076	2044	NM_004439	Hs.479853	EPH receptor A5	||2.7.1.112||EPHA5||CEK7||TYRO4||Eph homology kinase-1||EPH receptor A5||BSK, MOUSE, HOMOLOG OF||EHK1, RAT, HOMOLOG OF||ephrin type-A receptor 5||tyrosine-protein kinase receptor EHK-1||receptor protein-tyrosine kinase HEK7||ephrin receptor EphA5 isoform a||ephrin receptor EphA5 isoform b||EPH HOMOLOGY KINASE 1, RAT, HOMOLOG OF||	2044	RefSeq	4	4	4q13.1	4q13.1	-	66018411	66364275	ATP binding	protein amino acid phosphorylation	integral to membrane
EPHA7	0.913	0.024	1.025	0.01	1.122	0.572097	2045	NM_004440	Hs.73962	EPH receptor A7	||OTTHUMP00000040586||2.7.1.112||EPHA7||EHK3||EPHRIN RECEPTOR EphA7||EPH receptor A7||Eph homology kinase-3||tyrosine-protein kinase receptor EHK-3||ephrin type-A receptor 7||receptor protein-tyrosine kinase HEK11||	2045	RefSeq	6	6	6q16.1	6q16.1	-	94007859	94185993	ATP binding	protein amino acid phosphorylation	integral to membrane
EPHA8	1.048	0.03	1.204	0.013	1.148	0.809323	2046	NM_020526	Hs.283613	EPH receptor A8	||HEK3||2.7.1.112||KIAA1459||EPHA8||tyrosylprotein kinase||protein-tyrosine kinase||hydroxyaryl-protein kinase||EPHRIN RECEPTOR EphA8||EPH receptor A8||tyrosine-protein kinase receptor eek||EPH- AND ELK-RELATED KINASE||PROTEIN TYROSINE KINASE EEK||ephrin type-A receptor 8 precursor||eph- and elk-related tyrosine kinase||EPH receptor A8 isoform 2 precursor||EPH receptor A8 isoform 1 precursor||	2046	RefSeq	1	1	1p36.12	1p36.12	+	22635322	22675393	ATP binding	protein amino acid phosphorylation	integral to membrane
EPHB1	0.946	0.021	1.089	0.009	1.15	0.827571	2047	NM_004441	Hs.116092	EPH receptor B1	||Hek6||2.7.1.112||EPHB1||EPHT2||ELK||NET||EPH receptor B1||ephrin receptor EphB1 precursor||eph tyrosine kinase 2||NEURONALLY EXPRESSED EPH-RELATED TYROSINE KINASE||	2047	RefSeq	3	3	3q22.1	3q21-q23	+	135996957	136461353	ATP binding	neurogenesis	integral to plasma membrane
EPHB2	1.01	0.05	1.075	0.028	1.064	0.0429013	2048	NM_004442	Hs.523329	EPH receptor B2	||Hek5||2.7.1.112||EPHB2||DRT||MGC87492||Tyro5||EPHT3||ERK||elk-related tyrosine kinase||EPH receptor B2||developmentally-regulated eph-related tyrosine kinase||eph tyrosine kinase 3||DEVELOPMENTALLY REGULATED EPH-RELATED TYROSINE KINASE||ephrin receptor EphB2 isoform 2 precursor||ephrin receptor EphB2 isoform 1 precursor||	2048	RefSeq	1	1	1p36.12	1p36.1-p35	+	22782763	22987098	ATP binding	neurogenesis	integral to membrane
EPHB3	0.928	0.009	1.112	0.001	1.198	1.26553	2049	NM_004443	Hs.2913	EPH receptor B3	||ETK2||EPHB3||2.7.1.112||TYRO6||HEK2||EPH-like tyrosine kinase-2||EPH receptor B3||human embryo kinase 2||ephrin receptor EphB3 precursor||EPH-LIKE TYROSINE KINASE 2||	2049	RefSeq	3	3	3q27.1	3q21-qter	+	185762288	185782897	ATP binding	protein amino acid phosphorylation	integral to plasma membrane
EPHB4	0.966	0.043	1.092	0.001	1.129	0.635966	2050	NM_004444	Hs.437008	EPH receptor B4	||HTK||EPHB4||2.7.1.112||TYRO11||MYK1||EPH receptor B4||hepatoma transmembrane kinase||MYK, MOUSE, HOMOLOG OF||ephrin receptor EphB4 precursor||	2050	RefSeq	7	7	7q22.1	7q22	-	100044837	100069678	ATP binding	cell proliferation	integral to plasma membrane
EPHB6	0.915	0.017	1.026	0.005	1.12	0.553849	2051	NM_004445	Hs.380089	EPH receptor B6	||HEP||EPHB6||EPH receptor B6||ephrin receptor EphB6 precursor||HUMAN KINASE-DEFECTIVE Eph-FAMILY RECEPTOR PROTEIN||	2051	RefSeq	7	7	7q34	7q33-q35	+	142069659	142085684	ATP binding	protein amino acid phosphorylation	integral to membrane
ERBB2	0.819	0.025	0.97	0.003	1.183	1.12867	2064	NM_004448	Hs.446352	V-erb-b2 erythroblastic leukemia viral oncogene homolog 2, neuro/glioblastoma derived oncogene homolog (avian)	||HER-2/neu||ERBB2||2.7.1.112||TKR1 HERSTATIN||ONCOGENE ERBB2||erbB-2 isoform a||c-erb B2/neu protein||erbB-2 isoform b||neuroblastoma/glioblastoma derived oncogene homolog||ONCOGENE NGL, NEUROBLASTOMA- OR GLIOBLASTOMA-DERIVED||TYROSINE KINASE-TYPE CELL SURFACE RECEPTOR HER2||V-erb-b2 erythroblastic leukemia viral oncogene homolog 2, neuro/glioblastoma derived oncogene homolog (avian)||v-erb-b2 a…	2064	RefSeq	17	17	17q12	17q11.2-q12	+	35109921	35138436	ATP binding	cell proliferation	extracellular region
ERBB3	0.911	0.066	1.099	0.019	1.206	1.33852	2065	NM_001982	Hs.118681	V-erb-b2 erythroblastic leukemia viral oncogene homolog 3 (avian)	||ERBB3||2.7.1.112||p180-ErbB3||MGC88033||c-erbB3||p45-sErbB3||erbB3-S||c-erbB-3||p85-sErbB3||MDA-BF-1||ONCOGENE ERBB3||erbB-3 isoform s precursor||erbB-3 isoform 1 precursor||TYROSINE KINASE-TYPE CELL SURFACE RECEPTOR HER3||v-erb-b2 avian erythroblastic leukemia viral oncogene homolog 3||V-erb-b2 erythroblastic leukemia viral oncogene homolog 3 (avian)||	2065	RefSeq	12	12	12q13.2	12q13	+	54760153	54782854	ATP binding	protein amino acid phosphorylation	integral to plasma membrane
ERBB4	0.646	0.021	0.869	0.005	1.345	2.60676	2066	NM_005235	Hs.390729	V-erb-a erythroblastic leukemia viral oncogene homolog 4 (avian)	||ERBB4||ONCOGENE ERBB4||TYROSINE KINASE-TYPE CELL SURFACE RECEPTOR HER4||V-erb-a erythroblastic leukemia viral oncogene homolog 4 (avian)||V-ERB-B2 AVIAN ERYTHROBLASTIC LEUKEMIA VIRAL ONCOGENE HOMOLOG 4||avian erythroblastic leukemia viral (v-erb-b2) oncogene homolog 4||v-erb-a avian erythroblastic leukemia viral oncogene homolog-like 4||	2066	RefSeq	2	2	2q34	2q33.3-q34	-	212072320	213228793	ATP binding	cell proliferation	integral to plasma membrane
ERK8	0.835	0.07	0.931	0.02	1.115	0.508229	225689	NM_139021	Hs.493169	Mitogen-activated protein kinase 15	||ERK8||MAPK15||Mitogen-activated protein kinase 15||	225689	RefSeq	8	8	8q24.3		+	144870497	144876614	ATP binding	autophosphorylation	extracellular region
ERN1	0.91	0.068	0.909	0.021	0.998	-0.559287	2081	NM_001433	Hs.133982	Endoplasmic reticulum to nucleus signalling 1	||IRE1P||FLJ30999||ERN1||protein kinase/endoribonuclease||ENDOPLASMIC RETICULUM-TO-NUCLEUS SIGNALING 1||ER to nucleus signalling 1||Endoplasmic reticulum to nucleus signalling 1||INOSITOL-REQUIRING 1, S. CEREVISIAE, HOMOLOG OF||endoplasmic reticulum to nucleus signalling 1 isoform 1||endoplasmic reticulum to nucleus signalling 1 isoform 2||	2081	RefSeq	17	17	17q23.3	17q24.2	-	59474491	59561208	ATP binding	apoptosis	endoplasmic reticulum membrane
EVI1	0.968	0.061	1.112	0.042	1.148	0.809323	2122	NM_005241	Hs.165830	Ecotropic viral integration site 1	||||EVI1||Ecotropic viral integration site 1||		RefSeq	3	3	3q26.2	3q24-q28	-	170285251	170346795	DNA binding	development	nucleus
FASTK	0.72	0.024	0.878	0.017	1.219	1.45713	10922	NM_006712	Hs.75087	Fas-activated serine/threonine kinase	||FASTK||Fas-activated serine/threonine kinase||	10922	RefSeq	7	7	7q36.1	7q35	-	150211355	150215599	ATP binding	apoptosis
FER	0.997	0.057	1.135	0.044	1.138	0.718082	2241	NM_005246	Hs.221472	Fer (fps/fes related) tyrosine kinase (phosphoprotein NCP94)	||2.7.1.112||TYK3||FER||FPS/FES-RELATED TYROSINE KINASE||PROTEIN-TYROSINE KINASE 3||fer (fps/fes related) tyrosine kinase (phosphoprotein NCP94)||	2241	RefSeq	5	5	5q21.3	5q21	+	108111421	108551272	ATP binding	intracellular signaling cascade	nucleus
FES	0.695	0.01	0.826	0.012	1.188	1.17429	2242	NM_002005	Hs.7636	Feline sarcoma oncogene	||2.7.1.112||FES||Feline sarcoma oncogene||Oncogene FES, feline sarcoma virus||V-FES feline sarcoma viral/V-FPS fujinami avian sarcoma viral oncogene homolog||feline sarcoma (Snyder-Theilen) viral (v-fes)/Fujinami avian sarcoma (PRCII) viral (v-fps) oncogene homolog||	2242	RefSeq	15	15	15q26.1	15q26.1	+	89228712	89240010	ATP binding	cell proliferation
FGFR1	0.637	0.011	0.796	0.018	1.248	1.72173	2260	NM_000604	Hs.264887	Fibroblast growth factor receptor 1 (fms-related tyrosine kinase 2, Pfeiffer syndrome)	||BFGFR||C-FGR||KAL2||H2||H3||H4||2.7.1.112||H5||CEK||FGFR1||FLT2||FMS-LIKE GENE||tyrosylprotein kinase||protein-tyrosine kinase||hydroxyaryl-protein kinase||FLG protein||FGFR1/FGFR1OP2 FUSION GENE||FGFR1/ZNF198 FUSION GENE||fms-related tyrosine kinase-2||N-sam tyrosine kinase||heparin-binding growth factor receptor||FMS-like tyrosine kinase 2||FLG FGFR1/BCR FUSION GENE||basic fibroblast growth f…	2260	RefSeq	8	8	8p12	8p11.2-p11.1	-	38389448	38445293	ATP binding	MAPKKK cascade	integral to plasma membrane
FGFR2	0.848	0.002	0.903	0.004	1.063	0.0337772	2263	NM_000141	Hs.533683	Fibroblast growth factor receptor 2 (bacteria-expressed kinase, keratinocyte growth factor receptor, craniofacial dysostosis 1, Crouzon syndrome, Pfeiffer syndrome, Jackson-Weiss syndrome)	||FGFR2||TK25||JWS||2.7.1.112||KGFR||CFD1||ECT1||CEK3||BFR-1||FGF receptor||K-sam protein||hydroxyaryl-protein kinase||tyrosylprotein kinase||BEK, MOUSE, HOMOLOG OF||transmembrane protein tyrosine kinase||fibroblast growth factor receptor BEK||TK14 KERATINOCYTE GROWTH FACTOR RECEPTOR||BEK fibroblast growth factor receptor||PROTEIN TYROSINE KINASE, RECEPTOR-LIKE, 14||protein tyrosine kinase, recep…	2263	RefSeq	10	10	10q26.13	10q26	-	123227845	123347907	ATP binding	cell growth	integral to membrane
FGFR3	1.005	0.039	1.14	0.002	1.135	0.69071	2261	NM_000142	Hs.1420	Fibroblast growth factor receptor 3 (achondroplasia, thanatophoric dwarfism)	||2.7.1.112||HSFGFR3EX||CEK2||FGFR3||hydroxyaryl-protein kinase||tyrosine kinase JTK4||fibroblast growth factor receptor 3 isoform 2 precursor||Fibroblast growth factor receptor 3 (achondroplasia, thanatophoric dwarfism)||fibroblast growth factor receptor 3 isoform 1 precursor||	2261	RefSeq	4	4	4p16.3	4p16.3	+	1762853	1777829	ATP binding	JAK-STAT cascade	integral to plasma membrane
FGFR4	0.887	0.024	0.91	0	1.025	-0.312937	2264	NM_002011	Hs.165950	Fibroblast growth factor receptor 4	||2.7.1.112||MGC20292||JTK2||FGFR4||TKF||tyrosylprotein kinase||hydroxyaryl-protein kinase||protein-tyrosine kinase||Fibroblast growth factor receptor 4||fibroblast growth factor receptor 4 isoform 1 precursor||tyrosine kinase related to fibroblast growth factor receptor||fibroblast growth factor receptor 4 isoform 2 precursor||	2264	RefSeq	5	5	5q35.2	5q35.1-qter	+	176446526	176457730	ATP binding	fibroblast growth factor receptor signaling pathway	integral to plasma membrane
FGR	0.941	0.025	0.91	0.001	0.967	-0.842133	2268	NM_005248	Hs.1422	Gardner-Rasheed feline sarcoma viral (v-fgr) oncogene homolog	||p55c-fgr||2.7.1.112||FGR||p55-c-fgr protein||tyrosine kinase||c-src-2 protein||FGR ONCOGENE||Oncogene FGR||SRC2 ONCOGENE, FORMERLY||GARDNER-RASHEED FELINE SARCOMA VIRAL ONCOGENE HOMOLOG||Gardner-Rasheed feline sarcoma viral (v-fgr) oncogene homolog||	2268	RefSeq	1	1	1p36.11	1p36.2-p36.1	-	27622952	27634715	ATP binding	intracellular signaling cascade
FLJ10074	0.744	0.02	0.928	0.021	1.247	1.71261	55681	NM_017988	Hs.506481	SCY1-like 2 (S. cerevisiae)	||SCYL2||SCY1-like 2 (S. cerevisiae)||	55681	RefSeq	12	12	12q23.1	12q23.1	+	99179216	99235418	ATP binding	protein amino acid phosphorylation
FLJ10761	1.058	0.027	1.222	0.025	1.155	0.873192	55224	NM_018208	Hs.497469	Ethanolamine kinase 2	||ETNK2||Ethanolamine kinase 2||	55224	RefSeq	1	1	1q32.1	1q32.1	-	200831847	200852679	choline kinase activity	biological process unknown	cellular component unknown
RFK	0.872	0.021	0.939	0.014	1.076	0.15239	55312	NM_018339	Hs.37558	Riboflavin kinase	||RFK||Riboflavin kinase||	55312	RefSeq	9	9	9q21.13	9q21.13	-	76229999	76238987	magnesium ion binding	riboflavin biosynthesis	cytoplasm
FLJ12476	0.59	0.038	0.749	0.039	1.269	1.91334	64799	NM_022784	Hs.444535	Hypothetical protein FLJ12476	||FLJ12476||hypothetical protein FLJ12476||	64799	RefSeq	15	15	15q23	15q23	+	65334247	65581193	kinase activity
FLJ13052	0.702	0.014	0.891	0.013	1.269	1.91334	65220	NM_023018	Hs.456572	NAD kinase	||FLJ13052||NADK||NAD kinase||	65220	RefSeq	1	?	1p36.33	1p36.33-p36.21	-	1714834	1743670	NAD+ kinase activity	ATP metabolism	cytosol
FLJ20574	0.91	0.016	1.03	0.046	1.131	0.654214	54986	NM_017886					RefSeq	3		3p22.1		-	41805952	41978574
THNSL1	0.809	0.04	0.965	0.005	1.193	1.21991	79896	NM_024838	Hs.534486	Threonine synthase-like 1 (bacterial)	||THNSL1||Threonine synthase-like 1 (bacterial)||	79896	RefSeq	10	10	10p12.1	10p12.1	+	25345592	25354458	ATP binding	amino acid biosynthesis
FLJ23074	0.673	0.003	0.992	0.011	1.473	3.77465	80122	NM_025052	Hs.503776	Regulated in COPD kinase	||FLJ23074||YSK4||Regulated in COPD kinase||Yeast Sps1/Ste20-related kinase 4 (S. cerevisiae)||	80122	RefSeq	2	2	2q21.3	2q21.3	-	135570963	135572954	ATP binding	protein amino acid phosphorylation
LRRK1	0.595	0.044	0.964	0	1.62	5.11588	79705	NM_024652	Hs.513207	Leucine-rich repeat kinase 1	||LRRK1||Leucine-rich repeat kinase 1||	79705	RefSeq	15	15	15q26.3	15q26.3	+	99380194	99427834	ATP binding	protein amino acid phosphorylation
FLJ23356	0.568	0.029	0.895	0.025	1.575	4.7053	84197	NM_032237	Hs.491646	Hypothetical protein FLJ23356	||FLJ23356||hypothetical protein FLJ23356||	84197	RefSeq	8	8	8p11.21	8p11.21	+	43067817	43097480	ATP binding	protein amino acid phosphorylation
FLJ25006	0.822	0.005	1.101	0.012	1.338	2.5429	124923	NM_144610	Hs.351173	Hypothetical protein FLJ25006	||FLJ25006||hypothetical protein FLJ25006||	124923	RefSeq	17	17	17q11.2	17q11.2	-	23959108	23965338	ATP binding	protein amino acid phosphorylation
FLJ32685	0.732	0.013	1.096	0.029	1.497	3.99362	152110	NM_152534	Hs.546501	NIMA (never in mitosis gene a)- related kinase 10	||NEK10||FLJ32685||NIMA (never in mitosis gene a)- related kinase 10||	152110	RefSeq	3	3	3p24.1	3p24.1	-	27178760	27307988	ATP binding	protein amino acid phosphorylation
C9ORF98	0.613	0.001	1.009	0.032	1.644	5.33486	158067	NM_152572	Hs.421340	Chromosome 9 open reading frame 98	||C9orf98||Chromosome 9 open reading frame 98||	158067	RefSeq	9	9	9q34.13	9q34.13	-	132630518	132783752	ATP binding	nucleobase, nucleoside, nucleotide and nucleic acid metabolism
FLJ34389	0.767	0.008	1.007	0.006	1.313	2.31479	197259	NM_152649	Hs.119878	Mixed lineage kinase domain-like	||FLJ34389||MLKL||Mixed lineage kinase domain-like||	197259	RefSeq	16	16	16q22.3	16q22.3	-	73263261	73292290	ATP binding	protein amino acid phosphorylation
FLJ35107	0.894	0.029	1.016	0.04	1.135	0.69071	348825	XM_496631
FLT1	0.978	0.017	1.098	0.043	1.122	0.572097	2321	NM_002019	Hs.507621	Fms-related tyrosine kinase 1 (vascular endothelial growth factor/vascular permeability factor receptor)	||2.7.1.112||FLT1||VEGFR1||ONCOGENE FLT||VASCULAR ENDOTHELIAL GROWTH FACTOR RECEPTOR 1||Fms-related tyrosine kinase 1 (vascular endothelial growth factor/vascular permeability factor receptor)||	2321	RefSeq	13	13	13q12.2	13q12	-	27773789	27967232	ATP binding	angiogenesis	extracellular space
FLT3	0.852	0.022	0.949	0.027	1.113	0.489981	2322	NM_004119	Hs.507590	Fms-related tyrosine kinase 3	||2.7.1.112||STK1||CD135||FLT3||FLK2||OTTHUMP00000042340||Fms-related tyrosine kinase 3||STEM CELL TYROSINE KINASE 1||	2322	RefSeq	13	13	13q12.2	13q12	-	27475752	27572703	ATP binding	positive regulation of cell proliferation	integral to plasma membrane
FLT4	0.829	0.009	0.928	0.032	1.118	0.535601	2324	NM_002020	Hs.415048	Fms-related tyrosine kinase 4	||||FLT4||Fms-related tyrosine kinase 4||		RefSeq	5	5	5q35.3	5q34-q35	-	179967359	180009172	ATP binding	protein amino acid phosphorylation	integral to plasma membrane
FN3K	1.051	0.015	1.276	0.037	1.213	1.40239	64122	NM_022158	Hs.151135	Fructosamine 3 kinase	||FN3K||FRUCTOSAMINE 3-KINASE||Fructosamine 3 kinase||	64122	RefSeq	17	17	17q25.3	17q25.3	+	78286796	78302362	fructosamine-3-kinase activity	fructoselysine metabolism	cellular component unknown
FRAP1	0.706	0.035	1.085	0.019	1.535	4.34034	2475	NM_004958	Hs.338207	FK506 binding protein 12-rapamycin associated protein 1	||RAPT1||MTOR||RAFT1||FRAP1||FKBP-rapamycin associated protein||rapamycin target protein||MAMMALIAN TARGET OF RAPAMYCIN||rapamycin associated protein FRAP2||FKBP12-rapamycin complex-associated protein 1||FK506-BINDING PROTEIN 12-RAPAMYCIN COMPLEX-ASSOCIATED PROTEIN 1||FK506 binding protein 12-rapamycin associated protein 2||FK506 binding protein 12-rapamycin associated protein 1||dJ576K7.1 (FK506…	2475	RefSeq	1	1	1p36.22	1p36.2	-	11100857	11256830	binding	DNA recombination	phosphoinositide 3-kinase complex
FRDA	0.596	0.007	0.99	0.032	1.661	5.48997	2395	NM_000144	Hs.29978	Frataxin	||X25||Frataxin||FXN||MGC57199||FARR||FRDA GENE||Friedreich ataxia||frataxin isoform 2 preproprotein||frataxin isoform 1 preproprotein||	2395	RefSeq	9	9	9q21.11	9q13-q21.1	+	68879897	68918506	electron carrier activity	electron transport	mitochondrion
FRK	0.869	0.016	0.887	0.111	1.02	-0.358558	2444	NM_002031	Hs.89426	Fyn-related kinase	||2.7.1.112||FRK||Fyn-related kinase||tyrosine-protein kinase FRK||GTK, MOUSE, HOMOLOG OF||nuclear tyrosine protein kinase RAK||PTK5 protein tyrosine kinase 5||	2444	RefSeq	6	6	6q22.1	6q21-q22.3	-	116369386	116488614	ATP binding	intracellular signaling cascade	nucleus
FUK	0.74	0.049	1.062	0.016	1.434	3.41881	197258	NM_145059	Hs.7907	Fucokinase	||Fucokinase||FUK||L-FUCOSE KINASE||	197258	RefSeq	16	16	16q22.1	16q22.1	+	69045998	69071677	ATP binding	metabolism	cytoplasm
FYN	0.782	0.009	1.068	0.004	1.365	2.78925	2534	NM_002037	Hs.390567	FYN oncogene related to SRC, FGR, YES	||2.7.1.112||FYN||MGC45350||SLK||c-syn protooncogene||src-like kinase||src/yes-related novel gene||tyrosine kinase p59fyn(T)||FYN TYROSINE KINASE PROTOONCOGENE||proto-oncogene tyrosine-protein kinase fyn||OKT3-induced calcium influx regulator||protein-tyrosine kinase fyn isoform c||protein-tyrosine kinase fyn isoform b||protein-tyrosine kinase fyn isoform a||FYN oncogene related to SRC, FGR, YES||	2534	RefSeq	6	6	6q21	6q21	-	112089177	112301320	ATP binding	calcium ion transport	cellular component unknown
GAK	0.847	0.017	1.16	0.007	1.369	2.82574	2580	NM_005255	Hs.369607	Cyclin G associated kinase	||MGC99654||GAK||CYCLIN G-ASSOCIATED KINASE||cyclin G associated kinase||	2580	RefSeq	4	4	4p16.3	4p16	-	832895	915805	ATP binding	protein amino acid phosphorylation	endoplasmic reticulum
GALK1	0.913	0.002	1.156	0.011	1.265	1.87684	2584	NM_000154	Hs.407966	Galactokinase 1	||GK1||2.7.1.6||GALK1||Galactokinase 1||	2584	RefSeq	17	17	17q25.1	17q24	-	71265612	71272875	ATP binding	carbohydrate phosphorylation	cytoplasm
GALK2	0.811	0.007	0.978	0.007	1.205	1.3294	2585	NM_002044	Hs.117532	Galactokinase 2	||MGC1745||2.7.1.6||GK2||GALK2||Galactokinase 2||galactokinase 2 isoform 1||galactokinase 2 isoform 2||	2585	RefSeq	15	15	15q21.1	15q21.1	+	47249713	47409294	ATP binding	carbohydrate phosphorylation	cytoplasm
GCK	0.693	0.003	1.068	0.001	1.54	4.38596	2645	NM_000162	Hs.1270	Glucokinase (hexokinase 4, maturity onset diabetes of the young 2)	||2.7.1.1||2.7.1.2||HK4||HXKP||GK||MODY2||GLK||GCK||HKIV||ATP:D-hexose 6-phosphotransferase||glucokinase isoform 2||glucokinase isoform 3||glucokinase isoform 1||hexokinase D, pancreatic isozyme||maturity onset diabetes of the young protein 2||Glucokinase (hexokinase 4, maturity onset diabetes of the young 2)||	2645	RefSeq	7	7	7p13	7p15.3-p15.1	-	43957109	44002278	ATP binding	glycolysis
GFRA2	0.722	0.004	0.956	0.016	1.324	2.41516	2675	NM_001495	Hs.441202	GDNF family receptor alpha 2	||RETL2||GDNFRB||TRNR2||NTNRA||GFRA2||NRTNR-ALPHA||GFR-alpha 2||TRN receptor, GPI-anchored||neurturin receptor alpha||RET ligand 2||PI-linked cell-surface accessory protein||GDNF FAMILY RECEPTOR ALPHA-2||GDNF family receptor alpha 2||GDNF family receptor alpha 2 preproprotein||TGF-beta related neurotrophic factor receptor 2||GLIAL CELL LINE-DERIVED NEUROTROPHIC FACTOR RECEPTOR BETA||glial cell li…	2675	RefSeq	8	8	8p21.3	8p21	-	21593811	21652737	glial cell line-derived neurotrophic factor receptor activity	transmembrane receptor protein tyrosine kinase signaling pathway	extrinsic to membrane
GK	0.543	0.003	0.876	0.004	1.61	5.02464	2710	NM_000167	Hs.1466	Glycerol kinase	||2.7.1.30||GKD||GK||ATP:GLYCEROL PHOSPHOTRANSFERASE||Glycerol kinase||glycerol kinase isoform a||glycerol kinase isoform b||	2710	RefSeq	X	X	Xp21.2	Xp21.3	+	30431196	30508381	ATP binding	carbohydrate metabolism	cytoplasm
GK2	0.578	0.023	0.904	0.017	1.564	4.60494	2712	NM_033214	Hs.98008	Glycerol kinase 2	||GKP2||GKTA||GK2||Glycerol kinase 2||glycerol kinase pseudogene 2||glycerol kinase testis specific 2||GLYCEROL KINASE, TESTICULAR, TYPE A||	2712	RefSeq	4	4	4q21.21	4q13	-	80684686	80686551	ATP binding	carbohydrate metabolism	cytoplasm
GMFB	0.782	0.004	1.043	0.007	1.332	2.48815	2764	NM_004124	Hs.151413	Glia maturation factor, beta	||GMFB||GMFB GLIA MATURATION FACTOR||Glia maturation factor, beta||	2764	RefSeq	14	14	14q22.2	14q22.2	-	54010958	54025494	actin binding		intracellular
GMFG	0.99	0.032	1.067	0.025	1.077	0.161514	9535	NM_004877	Hs.5210	Glia maturation factor, gamma	||GMF-GAMMA||GMFG||Glia maturation factor, gamma||	9535	RefSeq	19	19	19q13.2	19q13.2	-	44510841	44518011	actin binding	protein amino acid phosphorylation	intracellular
GNE	0.919	0.029	1.107	0.022	1.204	1.32027	10020	NM_005476	Hs.5920	Glucosamine (UDP-N-acetyl)-2-epimerase/N-acetylmannosamine kinase	||GNE||GLCNE||glucosamine (UDP-N-acetyl)-2-epimerase/N-acetylmannosamine kinase||UDP-N-ACETYLGLUCOSAMINE 2-EPIMERASE/N-ACETYLMANNOSAMINE KINASE||	10020	RefSeq	9	9	9p13.2	9p13.2	-	36204440	36248401	ATP binding	N-acetylneuraminate metabolism	cytoplasm
GRK4	1.227	0.005	1.293	0.039	1.053	-0.0574635	2868	NM_005307	Hs.32959	G protein-coupled receptor kinase 4	||IT11||2.7.1.-||GRK4||GRK4a||GPRK2L||GPRK4||G protein-coupled receptor kinase 4||G-protein coupled receptor kinase 4||G PROTEIN-DEPENDENT RECEPTOR KINASE 4||G protein-coupled receptor kinase 2-like (Drosophila)||G PROTEIN-COUPLED RECEPTOR KINASE 2 (DROSOPHILA)-LIKE||G protein-coupled receptor kinase 4 isoform gamma||G protein-coupled receptor kinase 4 isoform alpha||G protein-coupled receptor ki…	2868	RefSeq	4	4	4p16.3	4p16.3	+	3002704	3079479	ATP binding	protein amino acid phosphorylation
GRK5	0.8	0.011	1.14	0.013	1.424	3.32757	2869	NM_005308	Hs.524625	G protein-coupled receptor kinase 5	||2.7.1.-||GRK5||GPRK5||G protein-coupled receptor kinase 5||	2869	RefSeq	10	10	10q26.11	10q24-qter	+	120957192	121205125	ATP binding	G-protein signaling, coupled to cAMP nucleotide second messenger	cytoplasm
GRK6	0.689	0.046	1.055	0.02	1.531	4.30384	2870	NM_002082	Hs.235116	G protein-coupled receptor kinase 6	||2.7.1.-||FLJ32135||GPRK6||GRK6||G protein-coupled receptor kinase 6||G protein-coupled receptor kinase 6 isoform A||G protein-coupled receptor kinase 6 isoform B||G protein-coupled receptor kinase 6 isoform C||	2870	RefSeq	5	5	5q35.3	5q35	+	176786390	176802456	ATP binding	protein amino acid phosphorylation
GRK7	0.818	0.027	1.089	0.003	1.33	2.4699	131890	NM_139209	Hs.102513	G protein-coupled receptor kinase 7	||GRK7||GPRK7||G protein-coupled receptor kinase 7||	131890	RefSeq	3	3	3q23	3q21-q23	+	142979740	143020021	ATP binding	protein amino acid phosphorylation
GSG2	1.151	0.022	1.312	0.006	1.139	0.727206	83903	NM_031965	Hs.534059	Germ cell associated 2 (haspin)	||GSG2||GERM CELL-SPECIFIC GENE 2||Germ cell associated 2 (haspin)||HAPLOID GERM CELL-SPECIFIC NUCLEAR PROTEIN KINASE||	83903	RefSeq	17	17	17p13.2	17p13	+	3573949	3576739	ATP binding	protein amino acid phosphorylation	nucleus
GSK3A	0.658	0.002	0.971	0.011	1.475	3.79289	2931	NM_019884	Hs.466828	Glycogen synthase kinase 3 alpha	||GSK3A||DKFZp686D0638||Glycogen synthase kinase 3 alpha||	2931	RefSeq	19	19	19q13.2	19q13.2	-	47426177	47438576	ATP binding	protein amino acid phosphorylation
GSK3B	0.768	0.015	1.036	0.014	1.349	2.64326	2932	NM_002093	Hs.445733	Glycogen synthase kinase 3 beta	||GSK3B||GLYCOGEN SYNTHASE KINASE 3-BETA||Glycogen synthase kinase 3 beta||	2932	RefSeq	3	3	3q13.33	3q13.3	-	121028237	121295203	ATP binding	Wnt receptor signaling pathway
GTF2H1	0.585	0.039	0.837	0.017	1.43	3.38231	2965	NM_005316	Hs.523510	General transcription factor IIH, polypeptide 1, 62kDa	||TFB1||BTF2||GTF2H1||TFIIH, 62-KD SUBUNIT||GTF2H, 62-KD SUBUNIT||TRANSCRIPTION FACTOR IIH, 62-KD SUBUNIT||general transcription factor IIH, polypeptide 1, 62kDa||general transcription factor IIH, polypeptide 1 (62kD subunit)||	2965	RefSeq	11	11	11p15.1	11p15.1-p14	+	18300718	18345152	[RNA-polymerase]-subunit kinase activity	DNA repair	nucleus
GUCY2C	0.931	0.023	1.089	0.004	1.17	1.01005	2984	NM_004963	Hs.524278	Guanylate cyclase 2C (heat stable enterotoxin receptor)	||GUC2C||GUCY2C||STAR||4.6.1.2||HEAT-STABLE ENTEROTOXIN RECEPTOR||GUANYLYL CYCLASE 2C||guanylyl cyclase C||guanylate cyclase 2C (heat stable enterotoxin receptor)||	2984	RefSeq	12	12	12p13.1	12p12	-	14656842	14740696	ATP binding	cGMP biosynthesis	brush border
GUCY2D	0.934	0.036	1.072	0.022	1.147	0.800199	3000	NM_000180	Hs.309958	Guanylate cyclase 2D, membrane (retina-specific)	||CORD6||LCA1||4.6.1.2||GUC2D||GUC1A4||RETGC-1||GUCY2D||ROS-GC1||RETGC1||CYGD||GUANYLATE CYCLASE 2D, RETINAL||guanylate cyclase 2D, membrane (retina-specific)||	3000	RefSeq	17	17	17p13.1	17p13.1	+	7846716	7864382	ATP binding	cGMP biosynthesis	integral to plasma membrane
GUCY2F	1.022	0.004	1.147	0.003	1.122	0.572097	2986	NM_001522	Hs.123074	Guanylate cyclase 2F, retinal	||GC-F||4.6.1.2||GUC2F||RETGC-2||GUCY2F||ROS-GC2||RETGC2||CYGF||GUC2DL||GUANYLYL CYCLASE 2F, RETINAL||guanylate cyclase 2F, retinal||guanylate cyclase 2D-like, membrane (retina-specific)||	2986	RefSeq	X	X	Xq22.3	Xq22	-	108422279	108531432	ATP binding	cGMP biosynthesis	integral to plasma membrane
GUK1	0.828	0.016	1.125	0.002	1.358	2.72538	2987	NM_000858	Hs.376933	Guanylate kinase 1	||GMK||OTTHUMP00000061419||2.7.4.8||GUK1||GMP KINASE||ATP:GMP PHOSPHOTRANSFERASE||Guanylate kinase 1||	2987	RefSeq	1	1	1q42.13	1q32-q41	+	224634751	224643379	ATP binding	GTP biosynthesis
HSPB8	0.73	0.04	0.996	0.018	1.363	2.771	26353	NM_014365	Hs.400095	Heat shock 22kDa protein 8	||E2IG1||HSP22||HSPB8||E2-INDUCED GENE 1||PROTEIN KINASE H11||HEAT-SHOCK 27-KD PROTEIN 8||HEAT-SHOCK 22-KD PROTEIN 8||heat shock 22kDa protein 8||	26353	RefSeq	12	12	12q24.23	12q24.23	+	118079314	118095270	kinase activity	protein folding	cellular component unknown
HAK	0.983	0.024	1.127	0.013	1.146	0.791075	115701	NM_052947	Hs.388674	Alpha-kinase 2	||ALPK2||Alpha-kinase 2||	115701	RefSeq	18	18	18q21.31	18q21.31	-	54299463	54398381	ATP binding	protein amino acid phosphorylation
HCK	0.791	0.046	1.086	0.015	1.372	2.85311	3055	NM_002110	Hs.126521	Hemopoietic cell kinase	||2.7.1.112||HCK||JTK9||Hemopoietic cell kinase||tyrosine protein kinase HCK||hemopoietic cell kinase isoform p61HCK||	3055	RefSeq	20	20	20q11.21	20q11-q12	+	30103717	30153316	ATP binding	intracellular signaling cascade
HIPK2	0.849	0.031	0.938	0.01	1.104	0.407864	28996	NM_022740	Hs.397465	Homeodomain interacting protein kinase 2	||HIPK2||HOMEODOMAIN-INTERACTING PROTEIN KINASE 2||Homeodomain interacting protein kinase 2||	28996	RefSeq	7	7	7q34	7q32-q34	-	138714635	138773729	ATP binding	apoptosis	cytoplasm
HIPK3	0.826	0.035	0.984	0.015	1.19	1.19253	10114	NM_005734	Hs.201918	Homeodomain interacting protein kinase 3	||PKY||DYRK6||HIPK3||HOMEODOMAIN-INTERACTING PROTEIN KINASE 3||Homeodomain interacting protein kinase 3||	10114	RefSeq	11	11	11p13	11p13	+	33264532	33331690	ATP binding	apoptosis	nucleus
HIPK4	0.701	0.011	1.003	0.017	1.429	3.37319	147746	NM_144685	Hs.79363	Homeodomain interacting protein kinase 4	||HIPK4||Homeodomain interacting protein kinase 4||	147746	RefSeq	19	19	19q13.2	19q13.2	-	45577018	45587934	ATP binding	protein amino acid phosphorylation	nucleus
HK1	1.118	0.023	1.255	0.02	1.121	0.562973	3098	NM_000188	Hs.370365	Hexokinase 1	||HXK1||HK1||HK1-ta||2.7.1.1||HK1-tb||Hexokinase 1||glycolytic enzyme||brain form hexokinase||hexokinase 1 isoform HKI-R||hexokinase 1 isoform HKI-td||hexokinase 1 isoform HKI-ta/tb||	3098	RefSeq	10	10	10q22.1	10q22	+	70748628	70831641	ATP binding	glycolysis	membrane
HK2	0.887	0.004	1.056	0.015	1.191	1.20166	3099	NM_000189	Hs.406266	Hexokinase 2	||DKFZp686M1669||HK2||2.7.1.1||HXK2||HKII||Hexokinase 2||hexokinase-2, muscle||	3099	RefSeq	2	2	2p13.1	2p13	+	74971436	75032134	ATP binding	glycolysis	membrane
HK3	0.559	0.004	0.755	0.03	1.351	2.66151	3101	NM_002115	Hs.411695	Hexokinase 3 (white cell)	||2.7.1.1||HK3||HKIII||HXK3||ATP:D-hexose 6-phosphotransferase||HEXOKINASE, WHITE CELL||Hexokinase 3 (white cell)||	3101	RefSeq	5	5	5q35.2	5q35.2	-	176240476	176258921	ATP binding	glycolysis	membrane
HRI	0.774	0.007	1.022	0.026	1.32	2.37866	27102	NM_014413	Hs.520205	Eukaryotic translation initiation factor 2-alpha kinase 1	||EIF2AK1||Eukaryotic translation initiation factor 2-alpha kinase 1||	27102	RefSeq	7	7	7p22.1	7p22	-	5836705	5872017	ATP binding	autophosphorylation
STK32B	0.712	0.03	0.886	0.011	1.244	1.68523	55351	NM_018401	Hs.133062	Serine/threonine kinase 32B	||STK32B||serine/threonine kinase 32B||	55351	RefSeq	4	4	4p16.2	4p16.2	+	5171598	5620797
HSMDPKIN	0.677	0.034	0.898	0.001	1.325	2.42428	55561	XM_290516
HUNK	0.5	0.041	0.766	0.029	1.532	4.31297	30811	NM_014586	Hs.109437	Hormonally upregulated Neu-associated kinase	||HUNK||hormonally upregulated Neu-associated kinase||	30811	RefSeq	21	21	21q22.11	21q22.1	+	32167498	32298248	ATP binding	development
ITGB1BP1	0.99	0.011	1.051	0.047	1.061	0.0155291	9270	NM_004763	Hs.147770	Integrin beta 1 binding protein 1	||ITGB1BP1||ICAP1B||ITGB1BP1 ICAP1A||INTEGRIN CYTOPLASMIC DOMAIN-ASSOCIATED PROTEIN 1||Integrin beta 1 binding protein 1||INTEGRIN, BETA-1, BINDING PROTEIN OF, 1||	9270	RefSeq	2	2	2p25.1	2p25.2	-	9496414	9514233	protein C-terminus binding	cell-matrix adhesion	membrane
MASTL	0.992	0.003	1.048	0.003	1.056	-0.0300913	84930	NM_032844	Hs.276905	Microtubule associated serine/threonine kinase-like	||MASTL||FLJ14813 GENE||Microtubule associated serine/threonine kinase-like||	84930	RefSeq	10	10	10p12.1	10p12.1	+	27484297	27515854	ATP binding	protein amino acid phosphorylation
ICK	1.051	0.022	1.111	0.005	1.057	-0.0209672	22858	NM_014920	Hs.417022	Intestinal cell (MAK-like) kinase	||ICK||intestinal cell (MAK-like) kinase||	22858	RefSeq	6	6	6p12.1	6p12.3-p11.2	-	52974056	53034527	ATP binding	development
IGF1R	0.586	0.008	0.947	0.02	1.615	5.07026	3480	NM_000875	Hs.20573	Insulin-like growth factor 1 receptor	||||IGF1R||Insulin-like growth factor 1 receptor||		RefSeq	15	15	15q26.3	15q26.3	+	97010287	97319034	ATP binding	anti-apoptosis	integral to membrane
IHPK1	0.991	0.009	1.022	0.048	1.031	-0.258193	9807	NM_153273	Hs.517970	Inositol hexaphosphate kinase 1	||IP6K1||KIAA0263||IHPK1||Inositol hexaphosphate kinase 1||	9807	RefSeq	3	3	3p21.31	3p21.31	-	49739350	49760593	inositol-hexakisphosphate kinase activity		nucleus
IHPK2	1.031	0.036	1.317	0.035	1.277	1.98633	51447	NM_016291	Hs.476221	Inositol hexaphosphate kinase 2	||IP6K2||IHPK2||Inositol hexaphosphate kinase 2||	51447	RefSeq	3	3	3p21.31	3p21.31	-	48700442	48707861	inositol-hexakisphosphate kinase activity		nucleus
IHPK3	0.882	0.021	0.965	0.028	1.093	0.307499	117283	NM_054111	Hs.17253	Inositol hexaphosphate kinase 3	||IP6K3||INSP6K3||IHPK3||Inositol hexaphosphate kinase 3||	117283	RefSeq	6	6	6p21.31	6p21.31	-	33797424	33822660	inositol-hexakisphosphate kinase activity	DNA repair	cytoplasm
IKBKAP	0.828	0.002	0.941	0.021	1.135	0.69071	8518	NM_003640	Hs.494738	Inhibitor of kappa light polypeptide gene enhancer in B-cells, kinase complex-associated protein	||IKAP||IKBKAP||IKK COMPLEX-ASSOCIATED PROTEIN||ELP1, YEAST, HOMOLOG OF||inhibitor of kappa light polypeptide gene enhancer in B-cells, kinase complex-associated protein||INHIBITOR OF KAPPA LIGHT POLYPEPTIDE GENE ENHANCER IN B CELLS, KINASE COMPLEX-ASSOCIATED PROTEIN||	8518	RefSeq	9	9	9q31.3	9q31	-	108709355	108775951	kinase activity	immune response
IKBKB	0.923	0.02	1.118	0.032	1.211	1.38414	3551	XM_032491
IKBKE	0.77	0.021	0.938	0.017	1.217	1.43888	9641	NM_014002	Hs.321045	Inhibitor of kappa light polypeptide gene enhancer in B-cells, kinase epsilon	||IKKI||IKBKE||KIAA0151||IKKE||IKK-EPSILON||I-KAPPA-B KINASE-EPSILON||INDUCIBLE I-KAPPA-B KINASE||inhibitor of kappa light polypeptide gene enhancer in B-cells, kinase epsilon||INHIBITOR OF KAPPA LIGHT POLYPEPTIDE GENE ENHANCER IN B CELLS, KINASE OF, EPSILON||	9641			1		1q32.1				ATP binding	immune response	cytoplasm
IL2	0.792	0.007	0.989	0.015	1.248	1.72173	3558	NM_000586	Hs.89679	Interleukin 2	||IL2||TCGF||Interleukin 2||T-CELL GROWTH FACTOR||	3558	RefSeq	4	4	4q27	4q26-q27	-	123730232	123735485	cytokine activity	T cell differentiation	extracellular space
ILK	0.782	0.035	0.944	7.297	1.206	1.33852	3611	NM_004517	Hs.5158	Integrin-linked kinase	||||ILK||Integrin-linked kinase||		RefSeq	11	11	11p15.4	11p15.5-p15.4	+	6581587	6588673	ATP binding	cell-matrix adhesion
ILKAP	0.88	0.034	1.027	0.005	1.166	0.973556	80895	NM_030768	Hs.92033	Integrin-linked kinase-associated serine/threonine phosphatase 2C	||ILKAP||integrin-linked kinase-associated serine/threonine phosphatase 2C||	80895	RefSeq	2	2	2q37.3	2q37.3	-	238861043	238894324	hydrolase activity	integrin-mediated signaling pathway	protein serine/threonine phosphatase complex
IMPK	0.935	0.018	1.097	0.008	1.172	1.0283	253430	NM_152230	Hs.499690	Inositol polyphosphate multikinase	||IPMK||Inositol polyphosphate multikinase||	253430	RefSeq	10	10	10q21.1	10q21.1	-	59625623	59697700	inositol-polyphosphate multikinase activity		nucleus
INSR	0.78	0.001	0.935	0.061	1.197	1.2564	3643	NM_000208	Hs.465744	Insulin receptor	||INSR||Insulin receptor||IRAN, TYPE A||DIABETES MELLITUS, INSULIN-RESISTANT, WITH ACANTHOSIS NIGRICANS, TYPE A||INSR INSULIN RECEPTOR, DEFECT IN, WITH INSULIN-RESISTANT DIABETES MELLITUS AND ACANTHOSIS NIGRICANS||	3643	RefSeq	19	19	19p13.2	19p13.3-p13.2	-	7067637	7245011	ATP binding	carbohydrate metabolism	integral to plasma membrane
INSRR	0.85	0.041	1.044	0.056	1.227	1.53012	3645	NM_014215	Hs.248138	Insulin receptor-related receptor	||INSRR||IRR||Insulin receptor-related receptor||	3645	RefSeq	1	1	1q23.1	1q21-q23	-	153623737	153641739	ATP binding	protein amino acid phosphorylation	integral to plasma membrane
IRAK1	0.782	0.024	0.997	0.004	1.274	1.95896	3654	NM_001569	Hs.522819	Interleukin-1 receptor-associated kinase 1	||IRAK1||Interleukin-1 receptor-associated kinase 1||INTERLEUKIN 1 RECEPTOR-ASSOCIATED KINASE 1||	3654	RefSeq	X	X	Xq28	Xq28	-	152796808	152806189	ATP binding	activation of NF-kappaB-inducing kinase	interleukin-1 receptor complex
IRAK2	0.603	0.054	0.887	0.021	1.47	3.74727	3656	NM_001570	Hs.449207	Interleukin-1 receptor-associated kinase 2	||IRAK2||Interleukin-1 receptor-associated kinase 2||INTERLEUKIN 1 RECEPTOR-ASSOCIATED KINASE 2||	3656	RefSeq	3	3	3p25.3	3p25.3	+	10181629	10255723	ATP binding	I-kappaB kinase/NF-kappaB cascade
IRAK3	0.505	0.004	0.791	0.028	1.564	4.60494	11213	NM_007199	Hs.369265	Interleukin-1 receptor-associated kinase 3	||IRAK3||IRAKM||Interleukin-1 receptor-associated kinase 3||INTERLEUKIN 1 RECEPTOR-ASSOCIATED KINASE 3||INTERLEUKIN 1 RECEPTOR-ASSOCIATED KINASE M||	11213	RefSeq	12	12	12q14.3	12q14.3	+	64869283	64928652	ATP binding	cytokine and chemokine mediated signaling pathway
IRS1	0.922	0.013	1.063	0.008	1.153	0.854943	3667	NM_005544	Hs.471508	Insulin receptor substrate 1	||IRS1||Insulin receptor substrate 1||IRS1 CORONARY ARTERY DISEASE, SUSCEPTIBILITY TO||	3667	RefSeq	2	2	2q36.3	2q36	-	227425442	227489980	insulin receptor binding	signal transduction	cytoplasm
ITK	0.802	0.036	0.849	0.006	1.058	-0.0118431	3702	NM_005546	Hs.483938	IL2-inducible T-cell kinase	||ITK||IL2-inducible T-cell kinase||T-CELL TYROSINE KINASE EMT||MOUSE T-CELL ITK/TSK TYROSINE KINASE HOMOLOG||	3702	RefSeq	5	5	5q33.3	5q31-q32	+	156540484	156614687	ATP binding	cellular defense response
ITPK1	1.056	0.002	1.123	0.022	1.063	0.0337772	3705	NM_014216	Hs.308122	Inositol 1,3,4-triphosphate 5/6 kinase	||||ITPK1||Inositol 1,3,4-triphosphate 5/6 kinase||		RefSeq	14	14	14q32.12	14q31	-	92475959	92651980	catalytic activity	signal transduction	mitochondrion
ITPKA	0.942	0.034	1.086	0.007	1.152	0.845819	3706	NM_002220	Hs.2722	Inositol 1,4,5-trisphosphate 3-kinase A	||ITPKA||inositol 1,4,5-trisphosphate 3-kinase A||	3706	RefSeq	15	15	15q15.1	15q14-q21	+	39573413	39583037	calmodulin binding	signal transduction
ITPKB	0.991	0.002	1.136	0.018	1.146	0.791075	3707	NM_002221	Hs.528087	Inositol 1,4,5-trisphosphate 3-kinase B	||ITPKB||inositol 1,4,5-trisphosphate 3-kinase B||	3707	RefSeq	1	1	1q42.12	1q42.13	-	223126126	223231930	calmodulin binding	signal transduction
ITPKC	0.786	0.026	0.95	0.078	1.209	1.36589	80271	NM_025194	Hs.515415	Inositol 1,4,5-trisphosphate 3-kinase C	||ITPKC||inositol 1,4,5-trisphosphate 3-kinase C||	80271	RefSeq	19	19	19q13.2	19q13.1	+	45914847	45938603	inositol-trisphosphate 3-kinase activity
JAK1	0.96	0	1.087	0.016	1.132	0.663338	3716	NM_002227	Hs.551505	Janus kinase 1 (a protein tyrosine kinase)	||JAK1||Janus kinase 1 (a protein tyrosine kinase)||	3716	RefSeq	1	1	1p31.3	1p32.3-p31.3	-	65012228	65064007	ATP binding	intracellular signaling cascade	cytoskeleton
JAK2	0.919	0.001	1.116	0.024	1.213	1.40239	3717	NM_004972	Hs.434374	Janus kinase 2 (a protein tyrosine kinase)	||JAK2||Janus kinase 2 (a protein tyrosine kinase)||	3717	RefSeq	9	9	9p24.1	9p24	+	4975244	5117995	ATP binding	JAK-STAT cascade	cytoskeleton
JAK3	0.71	0.002	0.909	0.034	1.28	2.0137	3718	NM_000215	Hs.515247	Janus kinase 3 (a protein tyrosine kinase, leukocyte)	||LJAK||JAKL||JAK3||JANUS KINASE, LEUKOCYTE||Janus kinase 3 (a protein tyrosine kinase, leukocyte)||	3718	RefSeq	19	19	19p13.11	19p13.1	-	17797960	17819800	ATP binding	intracellular signaling cascade	cytoskeleton
JIK	0.739	0.012	0.961	0.014	1.3	2.19618	51347	NM_016281	Hs.368304	TAO kinase 3	||||RPS2||TAO kinase 3||		RefSeq	12	12	12q24.23	16p13.3	-	117050326	117273271	RNA binding	protein biosynthesis	cytosolic small ribosomal subunit (sensu Eukaryota)
KHK	0.843	0.017	0.973	0.043	1.154	0.864068	3795	NM_000221	Hs.159525	Ketohexokinase (fructokinase)	||FRUCTOSURIA||KHK||Ketohexokinase (fructokinase)||KETOHEXOKINASE DEFICIENCY KETOHEXOKINASE||HEPATIC FRUCTOKINASE DEFICIENCY||	3795	RefSeq	2	2	2p23.3	2p23.3-p23.2	+	27221770	27235252	ketohexokinase activity	carbohydrate metabolism
TNIK	0.585	0.175	0.969	0.012	1.655	5.43523	23043	XM_039796
MAST3	0.806	0.005	1.064	0.014	1.319	2.36954	23031	XM_038150	Hs.466184	Microtubule associated serine/threonine kinase 3	||MAST3||Microtubule associated serine/threonine kinase 3||	23031			19		19p13.11				ATP binding	protein amino acid phosphorylation
KIAA0999	0.778	0.025	0.983	0.008	1.262	1.84947	23387	NM_025164	Hs.167451	KIAA0999 protein	||KIAA0999||KIAA0999 protein||	23387	RefSeq	11	11	11q23.3	11q23.3	-	116219329	116474203	ATP binding	protein amino acid phosphorylation
KIAA1361	0.919	0.012	1.059	0.077	1.152	0.845819	57551	XM_290796
KIAA1399	0.934	0.027	1.128	0.029	1.207	1.34764	57574	XM_046685
KIAA1639	0.802	0.001	0.979	0.054	1.22	1.46626	57729	XM_290923	Hs.287383	KIAA1639 protein	||KIAA1639||KIAA1639 protein||	57729			1		1q42.13				ATP binding	protein amino acid phosphorylation
KIAA1765	0.953	0.03	1.186	0.006	1.244	1.68523	85443	XM_047355	Hs.388304	Doublecortin and CaM kinase-like 3	||DCAMKL3||doublecortin and CaM kinase-like 3||	85443			3		3p22.3				ATP binding	protein amino acid phosphorylation
KIAA1804	0.68	0.025	1.042	0.033	1.531	4.30384	84451	NM_032435	Hs.546455	Mixed lineage kinase 4	||KIAA1804||Mixed lineage kinase 4||	84451	RefSeq	1	1	1q42.2	1q42	+	229770248	229826486	ATP binding	protein amino acid phosphorylation
KIAA1811	0.788	0.01	1.05	0.009	1.332	2.48815	84446	NM_032430	Hs.182081	BR serine/threonine kinase 1	||KIAA1811||BRSK1||BR serine/threonine kinase 1||	84446	RefSeq	19	19	19q13.42	19q13.4	+	60487345	60515713	ATP binding	protein amino acid phosphorylation
LMTK3	0.516	0	0.809	0.008	1.568	4.64143	114783	XM_055866	Hs.207426	Lemur tyrosine kinase 3	||LMTK3||Lemur tyrosine kinase 3||	114783			19		19q13.32				ATP binding	protein amino acid phosphorylation
KIF13B	0.621	0.007	0.919	0.02	1.478	3.82027	23303	NM_015254	Hs.444767	Kinesin family member 13B	||KIAA0639||KIF13B||GAKIN||GUANYLATE KINASE-ASSOCIATED KINESIN||kinesin family member 13B||	23303	RefSeq	8	8	8p12	8p12	-	28980714	29176560	ATP binding	T cell activation	cytoplasm
KIS	0.647	0.003	0.902	0	1.394	3.05384	127933	NM_144624					RefSeq	1		1q23.3		+	159199290	159224018
KIT	0.711	0.045	0.927	0.014	1.304	2.23268	3815	NM_000222	Hs.479754	V-kit Hardy-Zuckerman 4 feline sarcoma viral oncogene homolog	||KIT||SCFR||KIT ONCOGENE||STEM CELL FACTOR RECEPTOR||MAST CELL GROWTH FACTOR RECEPTOR||v-kit Hardy-Zuckerman 4 feline sarcoma viral oncogene homolog||	3815	RefSeq	4	4	4q12	4q11-q12	+	55365088	55447783	ATP binding	protein amino acid dephosphorylation	integral to membrane
LMTK2	0.573	3.253	0.833	0.091	1.453	3.59216	22853	NM_014916	Hs.444179	Lemur tyrosine kinase 2	||LMTK2||Lemur tyrosine kinase 2||	22853	RefSeq	7	7	7q21.3	7q21.3	+	97380847	97480252	ATP binding	autophosphorylation	integral to membrane
KSR2	1.136	0.026	1.289	0.009	1.134	0.681586	283455	NM_173598	Hs.375836	Kinase suppressor of ras 2	||KSR2||Kinase suppressor of ras 2||	283455	RefSeq	12	12	12q24.22	12q24.22-q24.23	-	116370185	116756061	ATP binding	intracellular signaling cascade	membrane
LAK	0.741	0.007	1.122	0.005	1.514	4.14873	80216	NM_025144	Hs.535761	Alpha-kinase 1	||KIAA1527||ALPK1||LAK||Alpha-kinase 1||LYMPHOCYTE ALPHA KINASE||	80216	RefSeq	4	4	4q25	4q25	+	113656455	113720433	ATP binding	protein amino acid phosphorylation
LATS1	0.792	0.033	0.988	0.038	1.246	1.70348	9113	NM_004690	Hs.549084	LATS, large tumor suppressor, homolog 1 (Drosophila)	||LATS1||LATS, large tumor suppressor, homolog 1 (Drosophila)||LARGE TUMOR SUPPRESSOR, DROSOPHILA, HOMOLOG OF, 1||	9113	RefSeq	6	6	6q25.1	6q24-q25.1	-	150023743	150131506	ATP binding	G2/M transition of mitotic cell cycle	spindle pole
LATS2	0.935	0.046	1.051	0.012	1.123	0.581221	26524	NM_014572	Hs.78960	LATS, large tumor suppressor, homolog 2 (Drosophila)	||LATS2||LATS, large tumor suppressor, homolog 2 (Drosophila)||LARGE TUMOR SUPPRESSOR, DROSOPHILA, HOMOLOG OF, 2||	26524	RefSeq	13	13	13q12.11	13q11-q12	-	20446578	20533654	ATP binding	G1/S transition of mitotic cell cycle	nucleus
LCK	0.785	0.007	0.994	0.008	1.265	1.87684	3932	NM_005356	Hs.470627	Lymphocyte-specific protein tyrosine kinase	||LCK||ONCOGENE LCK||LYMPHOCYTE-SPECIFIC PROTEIN-TYROSINE KINASE||Lymphocyte-specific protein tyrosine kinase||	3932	RefSeq	1	1	1p35.1	1p34.3	+	32386024	32420854	ATP binding	Ras protein signal transduction	membrane fraction
LCP2	0.838	0.044	1.004	0.017	1.198	1.26553	3937	NM_005565	Hs.304475	Lymphocyte cytosolic protein 2 (SH2 domain containing leukocyte protein of 76kDa)	||SLP76||LCP2||SH2 DOMAIN-CONTAINING LEUKOCYTE PROTEIN, 76-KD||lymphocyte cytosolic protein 2 (SH2 domain containing leukocyte protein of 76kDa)||	3937	RefSeq	5	5	5q35.1	5q33.1-qter	-	169607666	169657400	protein binding	immune response
LIM	0.571	0.045	0.837	0.017	1.464	3.69253	10611	NM_006457	Hs.480311	PDZ and LIM domain 5	||ENH||PDLIM5||ENIGMA HOMOLOG||ENIGMA-LIKE LIM DOMAIN PROTEIN||PDZ and LIM domain 5||	10611	RefSeq	4	4	4q22.3	4q22	+	95730286	95943810	actin binding	heart development	cytosol
LIMK1	0.717	0.042	0.895	0	1.248	1.72173	3984	NM_002314	Hs.36566	LIM domain kinase 1	||LIMK1||LIM KINASE||LIM domain kinase 1||	3984	RefSeq	7	7	7q11.23	7q11.23	+	72942806	72981505	ATP binding	Rho protein signal transduction	cytoplasm
LIMK2	0.945	0.019	1.121	0.025	1.185	1.14691	3985	NM_005569	Hs.474596	LIM domain kinase 2	||||LIMK2||LIM domain kinase 2||		RefSeq	22	22	22q12.2	22q12.2	+	29932803	30000618	ATP binding	protein amino acid phosphorylation	cytoplasm
LOC115704	1.085	0.04	1.089	0.059	1.004	-0.504543	115704	NM_145245	Hs.26870	Ecotropic viral integration site 5-like	||EVI5L||Ecotropic viral integration site 5-like||	115704	RefSeq	19	19	19p13.2	19p13.2	+	7801242	7835861
LOC149420	0.74	0.008	1.041	0.05	1.406	3.16333	149420	NM_152835	Hs.468801	PDLIM1 interacting kinase 1 like	||PDIK1L||PDLIM1 interacting kinase 1 like||	149420	RefSeq	1	1	1p36.11	1p36.11	+	26122467	26136177	ATP binding	protein amino acid phosphorylation
PRPS1L1	0.676	0.017	1.021	0.001	1.508	4.09399	221823	NM_175886	Hs.169284	Phosphoribosyl pyrophosphate synthetase 1-like 1	||PRPS1L1||Phosphoribosyl pyrophosphate synthetase 1-like 1||	221823	RefSeq	7	7	7p21.1	7p21.1	-	17839637	17840726	kinase activity	nucleoside metabolism	cellular component unknown
LOC340371	0.84	0.012	1.021	0.012	1.214	1.41151	340371	NM_178564	Hs.521926	Nuclear receptor binding protein 2	||NRBP2||Nuclear receptor binding protein 2||	340371	RefSeq	8	8	8q24.3	8q24.3	-	144987904	144996188	ATP binding	protein amino acid phosphorylation
LOC91807	1.069	0.024	1.299	0.002	1.215	1.42064	91807	NM_182493	Hs.339846	Cardiac-MyBP-C associated Ca/CaM kinase	||LOC91807||MLCK||cardiac-MyBP-C associated Ca/CaM kinase||	91807	RefSeq	16	16	16q11.2	16q11.2	-	45298948	45339722	ATP binding	protein amino acid phosphorylation
LTK	0.703	0.015	0.851	0.011	1.211	1.38414	4058	NM_002344	Hs.434481	Leukocyte tyrosine kinase	||TYK1||LTK||Leukocyte tyrosine kinase||PROTEIN TYROSINE KINASE-1||	4058	RefSeq	15	15	15q15.1	15q15.1-q21.1	-	39583131	39593369	ATP binding	protein amino acid phosphorylation	integral to plasma membrane
LYK5	0.73	0.04	0.95	0.022	1.3	2.19618	92335	NM_153335	Hs.549229	Protein kinase LYK5	||LYK5||STRAD||STE20-RELATED ADAPTOR PROTEIN||protein kinase LYK5||	92335	RefSeq	17	17	17q23.3	17q23.3	-	59133933	59173062	ATP binding	protein amino acid phosphorylation
LYN	0.842	0.023	0.979	0.008	1.163	0.946184	2534	NM_002350	Hs.491767	V-yes-1 Yamaguchi sarcoma viral related oncogene homolog	||LYN||ONCOGENE LYN||v-yes-1 Yamaguchi sarcoma viral related oncogene homolog||	4067	RefSeq	8	8	8q12.1	8q13	+	56954925	57085685	ATP binding	intracellular signaling cascade
SMAD7	0.78	0.018	1.029	0.009	1.32	2.37866	4092	NM_005904	Hs.465087	SMAD, mothers against DPP homolog 7 (Drosophila)	||MADH7||SMAD7||SMA- AND MAD-RELATED PROTEIN 7||MOTHERS AGAINST DECAPENTAPLEGIC, DROSOPHILA, HOMOLOG OF, 7||SMAD, mothers against DPP homolog 7 (Drosophila)||	4092	RefSeq	18	18	18q21.1	18q21.1	-	44700221	44731079	protein binding	regulation of transcription, DNA-dependent	intracellular
MAGI-3	1.145	0.019	1.211	0.043	1.057	-0.0209672	260425	NM_020965	Hs.486189	Membrane-associated guanylate kinase-related (MAGI-3)	||MAGI-3||MAGI3||Membrane-associated guanylate kinase-related (MAGI-3)||membrane associated guanylate kinase, WW and PDZ domain containing 3||	260425	RefSeq	1	1	1p13.2	1p12-p11.2	+	113645412	113937008	guanylate kinase activity	apoptosis	membrane
MAK	0.784	0.02	0.867	0.053	1.105	0.416988	4117	NM_005906	Hs.446125	Male germ cell-associated kinase	||MAK||Male germ cell-associated kinase||	4117	RefSeq	6	6	6p24.2	6q22	-	10870941	10939096	ATP binding	cell differentiation
MALT1	0.851	0.001	1.049	0.06	1.232	1.57574	10892	NM_006785	Hs.180566	Mucosa associated lymphoid tissue lymphoma translocation gene 1	||PARACASPASE||MALT1||MLT||MUCOSA-ASSOCIATED LYMPHOID TISSUE LYMPHOMA TRANSLOCATION GENE 1||Mucosa associated lymphoid tissue lymphoma translocation gene 1||	10892	RefSeq	18	18	18q21.31	18q21	+	54489597	54568350	caspase activity	activation of NF-kappaB-inducing kinase	intracellular
MAP2K1	0.505	0.014	0.854	0.024	1.691	5.76369	5604	NM_002755	Hs.145442	Mitogen-activated protein kinase kinase 1	||PRKMK1||MKK1||MAPKK1||MEK1||MAP2K1||MAPK/ERK KINASE 1||PROTEIN KINASE, MITOGEN-ACTIVATED, KINASE 1||Mitogen-activated protein kinase kinase 1||	5604	RefSeq	15	15	15q22.31	15q22.1-q22.33	+	64466678	64570935	ATP binding	cell motility
MAP2K1IP1	0.979	0.001	1.096	0.022	1.119	0.544725	8649	NM_021970	Hs.433332	Mitogen-activated protein kinase kinase 1 interacting protein 1	||MP1||MAP2K1IP1||MEK PARTNER 1||Mitogen-activated protein kinase kinase 1 interacting protein 1||	8649	RefSeq	4	4	4q23	4q23	-	101159542	101172881
MAP2K2	0.697	0.008	0.93	0.005	1.334	2.5064	5605	NM_030662	Hs.465627	Mitogen-activated protein kinase kinase 2	||MAPKK2||MAP2K2||MEK2||PRKMK2||MKK2||MAPK/ERK KINASE 2||Mitogen-activated protein kinase kinase 2||PROTEIN KINASE, MITOGEN-ACTIVATED, KINASE 2||	5605	RefSeq	19	19	19p13.3	19p13.3	-	4041321	4075126	ATP binding	protein amino acid phosphorylation	extracellular region
MAP2K3	0.812	0.043	0.994	0.031	1.224	1.50275	5606	NM_002756	Hs.514012	Mitogen-activated protein kinase kinase 3	||MAPKK3||MAP2K3||MEK3||PRKMK3||MKK3||MAPK/ERK KINASE 3||Mitogen-activated protein kinase kinase 3||PROTEIN KINASE, MITOGEN-ACTIVATED, KINASE 3||	5606	RefSeq	17	17	17p11.2	17q11.2	+	21135373	21158870	ATP binding	positive regulation of protein kinase activity
MAP2K4	0.806	0.069	1.005	0	1.246	1.70348	6416	NM_003010	Hs.514681	Mitogen-activated protein kinase kinase 4	||SEK1||MAPKK4||MEK4||MAP2K4||SERK1||JNKK1||PRKMK4||MKK4||MAPK/ERK KINASE 4||JNK-ACTIVATED KINASE 1||SAPK/ERK KINASE 1||Mitogen-activated protein kinase kinase 4||PROTEIN KINASE, MITOGEN-ACTIVATED, KINASE 4||	6416	RefSeq	17	17	17p12	17p11.2	+	11864859	11987775	ATP binding	JNK cascade
MAP2K5	0.911	0.035	1.042	0	1.144	0.772827	5607	NM_002757	Hs.114198	Mitogen-activated protein kinase kinase 5	||MAP2K5||MAPKK5||PRKMK5||MEK5||MAPK/ERK KINASE 5||Mitogen-activated protein kinase kinase 5||PROTEIN KINASE, MITOGEN-ACTIVATED, KINASE 5||	5607	RefSeq	15	15	15q23	15q23	+	65622074	65886506	ATP binding	cell cycle
MAP2K6	0.774	0.006	0.979	0.003	1.264	1.86772	5608	NM_002758	Hs.463978	Mitogen-activated protein kinase kinase 6	||MAP2K6||MAPKK6||PRKMK6||MEK6||MKK6||MAPK/ERK KINASE 6||Mitogen-activated protein kinase kinase 6||PROTEIN KINASE, MITOGEN-ACTIVATED, KINASE 6||	5608	RefSeq	17	17	17q24.3	17q24.3	+	64922433	65051067	ATP binding	DNA damage induced protein phosphorylation
MAP2K7	0.748	0.027	0.931	0.037	1.245	1.69436	5609	NM_145185	Hs.531754	Mitogen-activated protein kinase kinase 7	||MAP2K7||MAPKK7||JNKK2||PRKMK7||MKK7||JNK-ACTIVATING KINASE 2||Mitogen-activated protein kinase kinase 7||PROTEIN KINASE, MITOGEN-ACTIVATED, KINASE 7||	5609	RefSeq	19	19	19p13.2	19p13.3-p13.2	+	7874764	7885362	ATP binding	protein amino acid phosphorylation
MAP3K1	0.697	0.043	0.872	0.079	1.251	1.7491	4214	XM_042066	Hs.508461	Mitogen-activated protein kinase kinase kinase 1	||MEKK1||MAP3K1||MAPKKK1||MEK KINASE||MAP/ERK KINASE KINASE 1||MITOGEN-ACTIVATED KINASE KINASE KINASE 1||Mitogen-activated protein kinase kinase kinase 1||	4214			5		5q11.2				ATP binding	protein amino acid phosphorylation	ubiquitin ligase complex
MAP3K10	0.891	0.014	1.056	0.036	1.184	1.13779	4294	NM_002446	Hs.466743	Mitogen-activated protein kinase kinase kinase 10	||MLK2||MAP3K10||MST||MKN28 KINASE||MIXED-LINEAGE KINASE 2||SERINE/THREONINE KINASE, MKN28-DERIVED, NONRECEPTOR-TYPE||Mitogen-activated protein kinase kinase kinase 10||	4294	RefSeq	19	19	19q13.2	19q13.2	+	45389490	45413314	ATP binding	activation of JNK
MAP3K11	0.615	0.053	0.925	0.011	1.502	4.03924	4296	NM_002419	Hs.502872	Mitogen-activated protein kinase kinase kinase 11	||MLK3||MAP3K11||PROTEIN-TYROSINE KINASE PTK1||MIXED-LINEAGE PROTEIN KINASE 3||Mitogen-activated protein kinase kinase kinase 11||	4296	RefSeq	11	11	11q13.1	11q13.1-q13.3	-	65121804	65138296	ATP binding	G1 phase of mitotic cell cycle	centrosome
MAP3K12	0.59	0.003	0.841	0.01	1.423	3.31844	7786	NM_006301	Hs.211601	Mitogen-activated protein kinase kinase kinase 12	||ZPK||MAP3K12||DLK||ZIPPER PROTEIN KINASE||PROTEIN KINASE MUK||DUAL LEUCINE ZIPPER KINASE||Mitogen-activated protein kinase kinase kinase 12||	7786	RefSeq	12	12	12q13.13	12q13	-	52160546	52179538	ATP binding	JNK cascade	cytoplasm
MAP3K13	0.752	0.008	1.011	0.021	1.344	2.59764	9175	NM_004721	Hs.432898	Ribosomal protein L4	||||RPL4||Ribosomal protein L4||		RefSeq	3	3	3q27.2	15q22	+	186563671	186683329	RNA binding	protein biosynthesis	cytosolic large ribosomal subunit (sensu Eukaryota)
MAP3K14	0.695	0.007	0.917	0.029	1.319	2.36954	9020	NM_003954	Hs.404183	Mitogen-activated protein kinase kinase kinase 14	||MAP3K14||HSNIK||NF-KAPPA-B-INDUCING KINASE||SERINE/THREONINE PROTEIN KINASE NIK||Mitogen-activated protein kinase kinase kinase 14||	9020	RefSeq	17	17	17q21.31	17q21	-	40696277	40724123	ATP binding	protein amino acid phosphorylation
MAP3K2	0.664	0.033	0.875	0.006	1.318	2.36041	10746	NM_006609	Hs.145605	Mitogen-activated protein kinase kinase kinase 2	||MAP3K2||Mitogen-activated protein kinase kinase kinase 2||	10746	RefSeq	2	2	2q14.3	2q14.3	-	127780007	127817035	ATP binding	activation of JNK
MAP3K3	0.762	0.013	0.984	0.022	1.291	2.11407	4215	NM_002401	Hs.29282	Mitogen-activated protein kinase kinase kinase 3	||MEKK3||MAPKKK3||MAP3K3||MAP/ERK KINASE KINASE 3||MITOGEN-ACTIVATED KINASE KINASE KINASE 3||Mitogen-activated protein kinase kinase kinase 3||	4215	RefSeq	17	17	17q23.3	17q23.3	+	59053532	59127401	ATP binding	MAPKKK cascade
MAP3K4	0.85	0.016	1.076	0.03	1.265	1.87684	4216	NM_005922	Hs.390428	Mitogen-activated protein kinase kinase kinase 4	||MAP3K4||KIAA0213||MEKK4||MAPKKK4||MTK1||MAP THREE KINASE 1||MAP/ERK KINASE KINASE 4||Mitogen-activated protein kinase kinase kinase 4||SSK2/SSK22 MAP KINASE KINASE KINASE, YEAST, HOMOLOG OF||	4216	RefSeq	6	6	6q26	6q26	+	161383232	161508792	ATP binding	JNK cascade
MAP3K5	0.904	0.035	1.137	0.003	1.256	1.79472	4217	NM_005923	Hs.186486	Mitogen-activated protein kinase kinase kinase 5	||MEKK5||ASK1||MAPKKK5||MAP3K5||APOPTOSIS SIGNAL-REGULATING KINASE 1||MAP/ERK KINASE KINASE 5||Mitogen-activated protein kinase kinase kinase 5||	4217	RefSeq	6	6	6q23.3	6q22.33	-	136919880	137155349	ATP binding	MAPKKK cascade
MAP3K6	0.894	0.034	1.132	0.054	1.266	1.88596	9064	NM_004672	Hs.194694	Mitogen-activated protein kinase kinase kinase 6	||MAPKKK6||MAP3K6||Mitogen-activated protein kinase kinase kinase 6||	9064	RefSeq	1	1	1p36.11	1p36.11	-	27365811	27377479
MAP3K8	0.88	0.027	1.17	0.024	1.33	2.4699	1326	NM_005204	Hs.432453	Mitogen-activated protein kinase kinase kinase 8	||2.7.1.-||FLJ10486||c-COT||ESTF||TPL2||MAP3K8||Tpl-2||ONCOGENE COT||tumor progression locus-2||Ewing sarcoma transformant||proto-oncogene serine/threoine protein kinase||TUMOR PROGRESSION LOCUS 2||Cancer Osaka thyroid oncogene||cot (cancer Osaka thyroid) oncogene||Mitogen-activated protein kinase kinase kinase 8||	1326	RefSeq	10	10	10p11.23	10p11.23	+	30762871	30790767	ATP binding	protein amino acid phosphorylation	cytosol
MAP3K9	1.059	0.001	1.345	0.014	1.27	1.92246	4293	XM_027237
MAP4K1	0.911	0.018	1.09	0.037	1.196	1.24728	11184	NM_007181	Hs.95424	Mitogen-activated protein kinase kinase kinase kinase 1	||MAP4K1||HPK1||HEMATOPOIETIC PROGENITOR KINASE 1||Mitogen-activated protein kinase kinase kinase kinase 1||	11184	RefSeq	19	19	19q13.2	19q13.1-q13.4	-	43770120	43800404	ATP binding	activation of JNK
MAP4K2	0.809	0.01	1.069	0.005	1.32	2.37866	5871	NM_004579	Hs.534341	Mitogen-activated protein kinase kinase kinase kinase 2	||MAP4K2||GCK||RAB8IP, FORMERLY||RAB8-INTERACTING PROTEIN, FORMERLY||GERMINAL CENTER KINASE||Mitogen-activated protein kinase kinase kinase kinase 2||	5871	RefSeq	11	11	11q13.1	11q13	-	64313185	64327289	ATP binding	JNK cascade	Golgi membrane
MAP4K3	0.715	0.012	0.857	0.042	1.197	1.2564	8491	NM_003618	Hs.468239	Mitogen-activated protein kinase kinase kinase kinase 3	||MAP4K3||MAPKKKK3||GLK||RAB8IPL1, FORMERLY||RAB8-INTERACTING PROTEIN-LIKE 1, FORMERLY||GERMINAL CENTER KINASE-LIKE KINASE||Mitogen-activated protein kinase kinase kinase kinase 3||	8491	RefSeq	2	2	2p22.1	2p22.1	-	39388073	39575870	ATP binding	JNK cascade
MAP4K4	1.012	0.021	1.18	0.005	1.165	0.964432	9448	NM_004834	Hs.431550	Mitogen-activated protein kinase kinase kinase kinase 4	||MAP4K4||HGK||HEMATOPOIETIC PROGENITOR KINASE/GERMINAL CENTER KINASE-LIKE KINASE||Mitogen-activated protein kinase kinase kinase kinase 4||	9448	RefSeq	2	2	2q11.2	2q11.2-q12	+	101773005	101969669	ATP binding	protein amino acid phosphorylation	cellular component unknown
MAP4K5	1.041	0.009	1.165	0.033	1.119	0.544725	11183	NM_006575	Hs.130491	Mitogen-activated protein kinase kinase kinase kinase 5	||MAP4K5||MAPKKKK5||Mitogen-activated protein kinase kinase kinase kinase 5||	11183	RefSeq	14	14	14q21.3	14q11.2-q21	-	49954992	50069126	ATP binding	activation of JNK	cytoplasm
MAPK1	0.559	0.023	0.884	0.029	1.58	4.75092	5594	NM_002745	Hs.431850	Mitogen-activated protein kinase 1	||PRKM1||PRKM2||MAPK1||p42MAPK||EXTRACELLULAR SIGNAL-REGULATED KINASE 2||Mitogen-activated protein kinase 1||PROTEIN KINASE, MITOGEN-ACTIVATED, 1||PROTEIN TYROSINE KINASE ERK2||PROTEIN KINASE, MITOGEN-ACTIVATED, 2||	5594	RefSeq	22	22	22q11.21	22q11.2	-	20441432	20546524	ATP binding	cell cycle
MAPK10	0.923	0.002	1.08	0.018	1.17	1.01005	5602	NM_002753	Hs.25209	Mitogen-activated protein kinase 10	||JNK3||PRKM10||MAPK10||C-JUN KINASE 3||Mitogen-activated protein kinase 10||PROTEIN KINASE, MITOGEN-ACTIVATED, 10||	5602	RefSeq	4	4	4q21.23	4q22.1-q23	-	87294810	87731462	ATP binding	JNK cascade
MAPK11	0.817	0.052	1.02	0.007	1.248	1.72173	5600	NM_002751	Hs.57732	Mitogen-activated protein kinase 11	||SAPK2B||p38-BETA-2||PRKM11||MAPK11||p38-2||Mitogen-activated protein kinase 11||STRESS-ACTIVATED PROTEIN KINASE 2B||PROTEIN KINASE, MITOGEN-ACTIVATED, 11||	5600	RefSeq	22	22	22q13.33	22q13.33	-	49004599	49011236	ATP binding	antimicrobial humoral response (sensu Vertebrata)	cellular component unknown
MAPK12	0.651	0.005	0.93	0.03	1.427	3.35494	6300	NM_002969	Hs.432642	Mitogen-activated protein kinase 12	||SAPK3||p38-GAMMA||MAPK12||ERK6||Mitogen-activated protein kinase 12||EXTRACELLULAR SIGNAL-REGULATED KINASE 6||STRESS-ACTIVATED PROTEIN KINASE 3||	6300	RefSeq	22	22	22q13.33	22q13.33	-	48993787	49002546	ATP binding	DNA damage induced protein phosphorylation	cytoplasm
MAPK13	0.869	0.016	1.068	0.021	1.229	1.54837	5603	NM_002754	Hs.178695	Mitogen-activated protein kinase 13	||SAPK4||p38-DELTA||PRKM13||MAPK13||STRESS-ACTIVATED PROTEIN KINASE 4||Mitogen-activated protein kinase 13||PROTEIN KINASE, MITOGEN-ACTIVATED, 13||	5603	RefSeq	6	6	6p21.31	6p21.31	+	36206239	36215820	ATP binding	cell cycle
MAPK14	0.894	0.038	1.082	0.008	1.209	1.36589	1432	NM_001315	Hs.485233	Mitogen-activated protein kinase 14	||SAPK2A||CSPB1||MAPK14||CSBP1||CSBP2||PRKM15||p38-ALPHA||PRKM14||p38alpha Exip||CSAID-BINDING PROTEIN 2||Csaids binding protein||CSAID-BINDING PROTEIN 1||p38 MAP KINASE||MAX-interacting protein 2||MAP kinase Mxi2||stress-activated protein kinase 2A||Mitogen-activated protein kinase 14||p38 mitogen activated protein kinase||CYTOKINE-SUPPRESSIVE ANTIINFLAMMATORY DRUG-BINDING PROTEIN 1||mitogen-act…	1432	RefSeq	6	6	6p21.31	6p21.3-p21.2	+	36103550	36186513	ATP binding	antimicrobial humoral response (sensu Vertebrata)	cytoplasm
MAPK3	0.712	0.08	0.948	0.011	1.33	2.4699	5595	NM_002746	Hs.861	Mitogen-activated protein kinase 3	||MAPK3||p44ERK1||PRKM3||p44MAPK||EXTRACELLULAR SIGNAL-REGULATED KINASE 1||Mitogen-activated protein kinase 3||PROTEIN KINASE, MITOGEN-ACTIVATED, 3||	5595	RefSeq	16	16	16p11.2	16p12-p11.2	-	30032927	30042039	ATP binding	protein amino acid phosphorylation	cellular component unknown
MAPK6	0.653	0.003	0.875	0.001	1.339	2.55202	5597	NM_002748	Hs.411847	Mitogen-activated protein kinase 6	||p97MAPK||PRKM6||MAPK6||ERK3||Mitogen-activated protein kinase 6||EXTRACELLULAR SIGNAL-REGULATED KINASE 3||PROTEIN KINASE, MITOGEN-ACTIVATED, 6||	5597	RefSeq	15	15	15q21.2	15q21	+	50098738	50145753	ATP binding	cell cycle
MAPK7	0.946	0.017	0.942	0.016	0.995	-0.586659	5598	NM_002749	Hs.150136	Mitogen-activated protein kinase 7	||PRKM7||MAPK7||ERK5||EXTRACELLULAR SIGNAL-REGULATED KINASE 5||PROTEIN KINASE, MITOGEN-ACTIVATED, 7||Mitogen-activated protein kinase 7||	5598	RefSeq	17	17	17p11.2	17p11.2	+	19222399	19227444	ATP binding	cell cycle
MAPK8	0.984	0.013	1.094	0.076	1.111	0.471733	5599	NM_002750	Hs.522924	Mitogen-activated protein kinase 8	||SAPK1||PRKM8||MAPK8||C-JUN KINASE 1||Mitogen-activated protein kinase 8||PROTEIN KINASE, MITOGEN-ACTIVATED, 8||STRESS-ACTIVATED PROTEIN KINASE JNK1||	5599	RefSeq	10	10	10q11.22	10q11.22	+	49279692	49313189	ATP binding	JNK cascade
MAPK8IP1	0.688	0.039	0.943	0.019	1.37	2.83487	9479	NM_005456	Hs.234249	Mitogen-activated protein kinase 8 interacting protein 1	||MAPK8IP1||IB1||JIP1||ISLET-BRAIN 1||JNK-INTERACTING PROTEIN 1||MITOGEN-ACTIVATED PROTEIN KINASE 8-INTERACTING PROTEIN 1||Mitogen-activated protein kinase 8 interacting protein 1||	9479	RefSeq	11	11	11p11.2	11p12-p11.2	+	45863777	45884591	MAP-kinase scaffold activity	regulation of JNK cascade	cytoplasm
MAPK8IP2	0.97	0.004	1.209	0	1.246	1.70348	23542	NM_012324	Hs.356523	Mitogen-activated protein kinase 8 interacting protein 2	||MAPK8IP2||IB2||JIP2||ISLET-BRAIN 2||JNK-INTERACTING PROTEIN 2||MITOGEN-ACTIVATED PROTEIN KINASE 8-INTERACTING PROTEIN 2||Mitogen-activated protein kinase 8 interacting protein 2||	23542	RefSeq	22	22	22q13.33	22q13.33	+	49329274	49340120	MAP-kinase scaffold activity	positive regulation of anti-apoptosis	cytoplasm
MAPK8IP3	0.539	0.029	0.994	0	1.844	7.15968	23162	NM_015133	Hs.207763	Mitogen-activated protein kinase 8 interacting protein 3	||SYD2||MAPK8IP3||JSAP1||JIP3||JNK-INTERACTING PROTEIN 3||JNK/STRESS-ACTIVATED PROTEIN KINASE-ASSOCIATED PROTEIN 1||MITOGEN-ACTIVATED PROTEIN KINASE 8-INTERACTING PROTEIN 3||SUNDAY DRIVER, DROSOPHILA, HOMOLOG OF, 2||Mitogen-activated protein kinase 8 interacting protein 3||	23162	RefSeq	16	16	16p13.3	16p13.3	+	1696221	1760318	MAP-kinase scaffold activity	proteolysis and peptidolysis	cytoplasm
MAPK9	0.788	0.005	1.091	0.03	1.384	2.9626	5601	NM_002752	Hs.484371	Mitogen-activated protein kinase 9	||JNK2||PRKM9||MAPK9||C-JUN KINASE 2||PROTEIN KINASE, MITOGEN-ACTIVATED, 9||Mitogen-activated protein kinase 9||	5601	RefSeq	5	5	5q35.3	5q35	-	179595389	179640216	ATP binding	JNK cascade
MAPKAPK2	0.535	0.043	0.81	0.003	1.512	4.13048	9261	NM_004759	Hs.519276	Mitogen-activated protein kinase-activated protein kinase 2	||MAPKAPK2||MAPKAP KINASE 2||Mitogen-activated protein kinase-activated protein kinase 2||	9261	RefSeq	1	1	1q32.1	1q32	+	203246683	203296021	ATP binding	MAPKKK cascade	nucleus
MAPKAPK3	0.661	0	0.976	0.02	1.475	3.79289	7867	NM_004635	Hs.234521	Mitogen-activated protein kinase-activated protein kinase 3	||MAPKAPK3||MAPKAP3||3PK||MAPKAP KINASE 3||Mitogen-activated protein kinase-activated protein kinase 3||	7867	RefSeq	3	3	3p21.31	3p21.3	+	50629604	50661723	ATP binding	protein amino acid phosphorylation	nucleus
MAPKAPK5	0.739	0.003	0.893	0.033	1.208	1.35677	8550	NM_003668	Hs.413901	Mitogen-activated protein kinase-activated protein kinase 5	||MAPKAPK5||PRAK||p38-REGULATED/ACTIVATED KINASE||MAPKAP KINASE 5||Mitogen-activated protein kinase-activated protein kinase 5||	8550	RefSeq	12	12	12q24.12	12q24.12	+	110742998	110793947	ATP binding	protein amino acid phosphorylation
MARK2	0.919	0.016	1.079	0.006	1.173	1.03742	2011	NM_004954	Hs.502809	MAP/microtubule affinity-regulating kinase 2	||EMK1||PAR-1||MGC99619||MARK2||MARK2 protein||protein-serine/threonine kinase||MAP/microtubule affinity-regulating kinase 2||ELKL motif kinase 1||MAP/microtubule affinity-regulating kinase 2 isoform a||MAP/microtubule affinity-regulating kinase 2 isoform b||	2011	RefSeq	11	11	11q13.1	11q12-q13	+	63412650	63433628	ATP binding	cell differentiation	membrane
MARK3	0.719	0.015	1.024	0.018	1.424	3.32757	4140	NM_002376	Hs.35828	MAP/microtubule affinity-regulating kinase 3	||MARK3||CTAK1||CDC25C-ASSOCIATED PROTEIN KINASE 1||MAP/microtubule affinity-regulating kinase 3||MICROTUBULE-ASSOCIATED PROTEIN/MICROTUBULE AFFINITY-REGULATING KINASE 3||	4140	RefSeq	14	14	14q32.32	14q32.3	+	102921523	103039917	ATP binding	protein amino acid phosphorylation
MARK4	0.97	0.003	1.229	0.012	1.267	1.89509	57787	NM_031417	Hs.34314	MAP/microtubule affinity-regulating kinase 4	||MARK4||MARKL1||KIAA1860||MAP/MICROTUBULE AFFINITY-REGULATING KINASE-LIKE 1||MAP/microtubule affinity-regulating kinase 4||	57787	RefSeq	19	19	19q13.32	19q13.3	+	50446681	50500381	ATP binding	microtubule bundle formation	centrosome
MAST2	0.742	0.01	1.155	0.02	1.555	4.52282	23139	NM_015112	Hs.319481	Microtubule associated serine/threonine kinase 2	||MAST2||Microtubule associated serine/threonine kinase 2||	23139	RefSeq	1	1	1p34.1	1p34.1	+	45981304	46213816	ATP binding	protein amino acid phosphorylation	cytoskeleton
MATK	0.788	0.005	1.111	0.004	1.409	3.19071	4145	NM_002378	Hs.515069	Megakaryocyte-associated tyrosine kinase	||CTK||HYL||MATK||Megakaryocyte-associated tyrosine kinase||MEGAKARYOCTYE-ASSOCIATED TYROSINE KINASE||CSK-TYPE PROTEIN TYROSINE KINASE||HEMATOPOIETIC CONSENSUS TYROSINE-LACKING KINASE||	4145	RefSeq	19	19	19p13.3	19p13.3	-	3728967	3752810	ATP binding	cell proliferation	soluble fraction
MBIP	0.783	0.012	1.02	0.042	1.302	2.21443	51562	NM_016586	Hs.368647	MAP3K12 binding inhibitory protein 1	||MBIP||MAP3K12 binding inhibitory protein 1||	51562	RefSeq	14	14	14q13.3	14q13.3	-	35837521	35859596	protein kinase inhibitor activity	inactivation of MAPK during osmolarity sensing	nucleus
MELK	0.941	0.031	1.244	0	1.321	2.38779	9833	NM_014791	Hs.184339	Maternal embryonic leucine zipper kinase	||KIAA0175||MELK||HPK38||Maternal embryonic leucine zipper kinase||	9833	RefSeq	9	9	9p13.2	9p13.2	+	36562904	36667678	ATP binding	protein amino acid phosphorylation
MERTK	0.678	0.025	0.964	0.049	1.42	3.29107	10461	NM_006343	Hs.306178	C-mer proto-oncogene tyrosine kinase	||MERTK||MER TYROSINE KINASE PROTOONCOGENE||MERTK RETINITIS PIGMENTOSA, MERTK-RELATED||C-mer proto-oncogene tyrosine kinase||	10461	RefSeq	2	2	2q13	2q14.1	+	112372415	112503168	ATP binding	cell surface receptor linked signal transduction	integral to plasma membrane
MET	0.604	0.002	0.924	0.008	1.53	4.29472	4233	NM_000245	Hs.132966	Met proto-oncogene (hepatocyte growth factor receptor)	||MET||RCCP2||HGFR||ONCOGENE MET||MET PROTOONCOGENE||RENAL CELL CARCINOMA, PAPILLARY, 2 GENE||Met proto-oncogene (hepatocyte growth factor receptor)||	4233	RefSeq	7	7	7q31.2	7q31	+	115906409	116032390	ATP binding	cell proliferation	integral to plasma membrane
MGC16169	0.541	0.031	0.861	0.01	1.59	4.84216	93627	NM_033115	Hs.292986	Hypothetical protein MGC16169	||MGC16169||hypothetical protein MGC16169||	93627	RefSeq	4	4	4q24	4q24	-	107324843	107594989	ATP binding	protein amino acid phosphorylation
STK32A	0.749	0.012	0.95	0.003	1.268	1.90421	202374	NM_145001	Hs.352370	Serine/threonine kinase 32A	||STK32A||serine/threonine kinase 32A||	202374	RefSeq	5	5	5q32	5q32	+	146594861	146708581	ATP binding	protein amino acid phosphorylation
CSNK1A1L	0.986	0.045	1.176	0.002	1.192	1.21078	122011	NM_145203	Hs.512897	Casein kinase 1, alpha 1-like	||CSNK1A1L||Casein kinase 1, alpha 1-like||	122011	RefSeq	13	13	13q13.3	13q13.3	-	36575396	36577801	ATP binding	Wnt receptor signaling pathway
MGC42105	0.934	0.024	1.15	0.018	1.231	1.56662	167359	NM_153361	Hs.25845	Hypothetical protein MGC42105	||MGC42105||hypothetical protein MGC42105||	167359	RefSeq	5	5	5p12	5p12	+	43228083	43316708	ATP binding	protein amino acid phosphorylation
C9ORF96	0.956	0.007	1.246	0.012	1.302	2.21443	169436	XM_291304
MGC45428	0.71	0.035	1.01	0.036	1.421	3.30019	166614	NM_152619	Hs.437045	Doublecortin and CaM kinase-like 2	||DCAMKL2||doublecortin and CaM kinase-like 2||	166614	RefSeq	4	4	4q31.23	4q31.23	+	151357745	151536188	ATP binding	intracellular signaling cascade
PIP5KL1	0.842	0.011	1.08	3.151	1.281	2.02282	138429	NM_173492	Hs.445486	Phosphatidylinositol-4-phosphate 5-kinase-like 1	||PIP5KL1||Phosphatidylinositol-4-phosphate 5-kinase-like 1||	138429	RefSeq	9	9	9q34.11	9q34.11	-	127763361	127769324	1-phosphatidylinositol-4-phosphate 5-kinase activity
MGC4796	0.593	0.019	0.917	0.013	1.545	4.43158	83931	NM_032017	Hs.471768	Serine/threonine kinase 40	||STK40||MGC4796||Serine/threonine kinase 40||	83931	RefSeq	1	1	1p34.3	1p34.3	-	36474317	36520578	ATP binding	protein amino acid phosphorylation
MGC5601	0.697	0.026	0.944	0.012	1.353	2.67976	80724	NM_025247	Hs.331141	Acyl-Coenzyme A dehydrogenase family, member 10	||ACAD10||acyl-Coenzyme A dehydrogenase family, member 10||	80724	RefSeq	12	12	12q24.12	12q24.12	+	110586621	110657621	acyl-CoA dehydrogenase activity	electron transport
MGC8407	0.825	0.015	1.021	0.005	1.237	1.62137	79012	NM_024046	Hs.145156	CaM kinase-like vesicle-associated	||CAMKV||MGC8407||CaM kinase-like vesicle-associated||	79012	RefSeq	3	3	3p21.31	3p21.31	-	49870425	49882328	ATP binding	protein amino acid phosphorylation
MIDORI	0.713	0.027	1.053	0.007	1.476	3.80202	57538	NM_020778	Hs.459183	Alpha-kinase 3	||ALPK3||Alpha-kinase 3||	57538	RefSeq	15	15	15q25.3	15q25.2	+	83160914	83214566	ATP binding	heart development	nucleus
MINK	0.614	0.011	0.884	0.073	1.44	3.47355	50488	NM_015716	Hs.443417	Misshapen-like kinase 1 (zebrafish)	||MINK1||Misshapen-like kinase 1 (zebrafish)||	50488	RefSeq	17	17	17p13.2	17p13.2	+	4683350	4742134	ATP binding	JNK cascade
MKNK1	0.85	0.014	1.069	0.015	1.257	1.80385	8569	NM_003684	Hs.371594	MAP kinase interacting serine/threonine kinase 1	||MKNK1||MNK1||MAPK-INTERACTING KINASE 1||MAP kinase interacting serine/threonine kinase 1||MITOGEN-ACTIVATED PROTEIN KINASE-INTERACTING SERINE/THREONINE KINASE 1||	8569	RefSeq	1	1	1p33	1p33	-	46735110	46781906	ATP binding	protein amino acid phosphorylation
MOS	0.815	0.035	1.115	0.034	1.367	2.80749	4342	NM_005372	Hs.533432	V-mos Moloney murine sarcoma viral oncogene homolog	||MOS||MSV||ONCOGENE MOS||MOLONEY MURINE SARCOMA VIRUS||v-mos Moloney murine sarcoma viral oncogene homolog||	4342	RefSeq	8	8	8q12.1	8q11	-	57188054	57189095	ATP binding	protein amino acid phosphorylation
MPP1	1.074	0.029	1.278	0.012	1.189	1.18341	4354	NM_002436	Hs.496984	Membrane protein, palmitoylated 1, 55kDa	||PEMP||EMP55||MPP1||ERYTHROCYTE MEMBRANE PROTEIN p55||PALMITOYLATED ERYTHROCYTE MEMBRANE PROTEIN||membrane protein, palmitoylated 1, 55kDa||	4354	RefSeq	X	X	Xq28	Xq28	-	153570671	153597467	guanylate kinase activity	signal transduction	integral to plasma membrane
MPP2	0.868	0.049	1.019	0.024	1.173	1.03742	4355	NM_005374	Hs.514208	Membrane protein, palmitoylated 2 (MAGUK p55 subfamily member 2)	||MPP2||DLG2, FORMERLY||DISCS LARGE, HOMOLOG 2||DISCS LARGE A, DROSOPHILA, HOMOLOG OF||DLG-A TUMOR SUPPRESSOR, DROSOPHILA, HOMOLOG OF||membrane protein, palmitoylated 2 (MAGUK p55 subfamily member 2)||	4355	RefSeq	17	17	17q21.31	17q12-q21	-	39308256	39340415	guanylate kinase activity	protein complex assembly	integral to plasma membrane
MPP3	0.656	0.037	1.008	0.039	1.535	4.34034	4356	NM_001932	Hs.396566	Membrane protein, palmitoylated 3 (MAGUK p55 subfamily member 3)	||MPP3||DLG3, FORMERLY||DISCS LARGE, DROSOPHILA, HOMOLOG OF, 3, FORMERLY||membrane protein, palmitoylated 3 (MAGUK p55 subfamily member 3)||	4356	RefSeq	17	17	17q21.31	17q12-q21	-	39233692	39265136	guanylate kinase activity	signal transduction	integral to plasma membrane
MPZL1	1.064	0.017	0.928	0.009	0.871	-1.71804	9019	NM_003953	Hs.493919	Myelin protein zero-like 1	||MPZL1||PZR||PROTEIN ZERO-RELATED||Myelin protein zero-like 1||	9019	RefSeq	1	1	1q24.2	1q24.2	+	164422865	164491716	protein binding	cell-cell signaling	integral to plasma membrane
MRC2	0.823	0.027	1.012	0.001	1.229	1.54837	9902	NM_006039	Hs.7835	Mannose receptor, C type 2	||MRC2||mannose receptor, C type 2||	9902	RefSeq	17	17	17q23.3	17q23.3	+	58058852	58123754	kinase activity	endocytosis	integral to membrane
MST1R	0.639	0.019	0.838	0.019	1.312	2.30567	4486	NM_002447	Hs.517973	Macrophage stimulating 1 receptor (c-met-related tyrosine kinase)	||MST1R||MSP RECEPTOR||RON PROTEIN TYROSINE KINASE||MACROPHAGE STIMULATING PROTEIN RECEPTOR||Macrophage stimulating 1 receptor (c-met-related tyrosine kinase)||	4486	RefSeq	3	3	3p21.31	3p21.3	-	49899441	49916074	ATP binding	cell motility	integral to plasma membrane
MST4	0.856	0.014	0.897	0.059	1.048	-0.103084	51765	NM_016542	Hs.444247	Mst3 and SOK1-related kinase	||MASK||MST4||Mst3 and SOK1-related kinase||	51765	RefSeq	X	X	Xq26.2	Xq26.2	+	130882861	130935506	ATP binding	protein amino acid phosphorylation
MUSK	0.774	0.018	0.959	0.001	1.239	1.63961	4593	NM_005592	Hs.521653	Muscle, skeletal, receptor tyrosine kinase	||MUSK||RECEPTOR TYROSINE KINASE MuSK||Muscle, skeletal, receptor tyrosine kinase||	4593	RefSeq	9	9	9q31.3	9q31.3-q32	+	110510693	110642833	ATP binding	development	integral to plasma membrane
MVD	0.735	0.018	0.858	0.004	1.167	0.98268	4597	NM_002461	Hs.252457	Mevalonate (diphospho) decarboxylase	||MPD||MVD||MEVALONATE PYROPHOSPHATE DECARBOXYLASE||Mevalonate (diphospho) decarboxylase||	4597	RefSeq	16	16	16q24.3	16q24.3	-	87245848	87256996	ATP binding	cholesterol biosynthesis
MVK	0.732	0.07	1.019	0.015	1.39	3.01735	4598	NM_000431	Hs.130607	Mevalonate kinase (mevalonic aciduria)	||MVK||MEVALONATE KINASE DEFICIENCY||MVK MEVALONIC ACIDURIA||Mevalonate kinase (mevalonic aciduria)||	4598	RefSeq	12	12	12q24.11	12q24	+	108474336	108497787	ATP binding	cholesterol biosynthesis	cytoplasm
MYLK	0.718	0.014	0.918	0.034	1.278	1.99545	4638	NM_005965	Hs.477375	Myosin, light polypeptide kinase	||MYLK||TELOKIN||KRP||MLCK KINASE-RELATED PROTEIN||MYOSIN LIGHT POLYPEPTIDE KINASE||MYOSIN LIGHT CHAIN KINASE||Myosin, light polypeptide kinase||	4638	RefSeq	3	3	3q21.1	3q21	-	124813834	124903051	ATP binding	protein amino acid phosphorylation
MYO3A	0.673	0.01	0.893	0.032	1.326	2.43341	53904	NM_017433	Hs.131367	Myosin IIIA	||MYO3A||myosin IIIA||	53904	RefSeq	10	10	10p12.1	10p11.1	+	26263201	26541461	ATP binding	perception of sound	cytoskeleton
MYO3B	0.727	0.007	0.896	0.016	1.231	1.56662	140469	NM_138995	Hs.534101	Myosin IIIB	||MYO3B||myosin IIIB||	140469	RefSeq	2	2	2q31.1		+	170860161	171336490	ATP binding	protein amino acid phosphorylation	cytoskeleton
NAGK	0.826	0.041	0.97	0.004	1.173	1.03742	55577	NM_017567	Hs.7036	N-acetylglucosamine kinase	||NAGK||GNK||GlcNAc KINASE||N-acetylglucosamine kinase||	55577	RefSeq	2	2	2p13.3	2p13.3	+	71207101	71217426	ATP binding	N-acetylglucosamine metabolism
NBEA	0.772	0.012	0.915	0.023	1.184	1.13779	26960	NM_015678	Hs.491172	Neurobeachin	||Neurobeachin||NBEA||	26960	RefSeq	13	13	13q13.2	13q13	+	34414455	35144872	protein kinase A binding	post-Golgi transport	Golgi trans face
NEK1	0.698	0.025	1	0.03	1.431	3.39143	4750	XM_291107
NEK11	0.968	0.011	1.127	0.037	1.164	0.955308	79858	NM_024800	Hs.200813	NIMA (never in mitosis gene a)- related kinase 11	||||NEK11||NIMA (never in mitosis gene a)- related kinase 11||		RefSeq	3	3	3q21.3	3q21.3	+	132228424	132552001	ATP binding	protein amino acid phosphorylation
NEK2	0.652	0.021	0.892	0.009	1.368	2.81662	4751	NM_002497	Hs.153704	NIMA (never in mitosis gene a)-related kinase 2	||NEK2||NIMA-RELATED KINASE 2||NEVER IN MITOSIS GENE A-RELATED KINASE 2||NIMA (never in mitosis gene a)-related kinase 2||	4751	RefSeq	1	1	1q32.3	1q32.2-q41	-	208224516	208237362	ATP binding	cytokinesis	centrosome
NEK4	0.81	0.028	1.075	0.004	1.326	2.43341	6787	NM_003157	Hs.129550	NIMA (never in mitosis gene a)-related kinase 4	||NRK2||STK2||NEK4||NIMA-RELATED KINASE 4||SERINE/THREONINE PROTEIN KINASE 2||NEVER IN MITOSIS GENE A-RELATED KINASE 4||NIMA (never in mitosis gene a)-related kinase 4||	6787	RefSeq	3	3	3p21.1	3p21.1	-	52719841	52779979	ATP binding	cell cycle	nucleus
NEK6	1.071	0.016	1.045	0.028	0.976	-0.760017	10783	NM_014397	Hs.197071	NIMA (never in mitosis gene a)-related kinase 6	||NEK6||NIMA-RELATED KINASE 6||NEVER IN MITOSIS GENE A-RELATED KINASE 6||NIMA (never in mitosis gene a)-related kinase 6||	10783	RefSeq	9	9	9q33.3	9q33.3-q34.11	+	124099802	124194271	ATP binding	positive regulation of I-kappaB kinase/NF-kappaB cascade	nucleus
NEK7	0.869	0.008	1.033	0.009	1.188	1.17429	140609	NM_133494	Hs.24119	NIMA (never in mitosis gene a)-related kinase 7	||NEK7||NIMA-RELATED KINASE 7||NEVER IN MITOSIS GENE A-RELATED KINASE 7||NIMA (never in mitosis gene a)-related kinase 7||	140609	RefSeq	1	1	1q31.3	1q31.3	+	194933338	195020426	ATP binding	protein amino acid phosphorylation
NEK8	0.632	0.022	0.701	0.126	1.108	0.44436	284086	NM_178170	Hs.448468	NIMA (never in mitosis gene a)- related kinase 8	||NEK8||NIMA (never in mitosis gene a)- related kinase 8||	284086	RefSeq	17	17	17q11.2	17q11.1	+	24079958	24093911	ATP binding	protein amino acid phosphorylation
NEK9	1.071	0.003	0.978	0.02	0.913	-1.33483	91754	NM_033116	Hs.7200	NIMA (never in mitosis gene a)- related kinase 9	||NEK9||NIMA (never in mitosis gene a)- related kinase 9||	91754	RefSeq	14	14	14q24.3	14q24.3	-	74620727	74663389	ATP binding	cell cycle
NLK	1.125	0.011	1.102	0.052	0.979	-0.732645	51701	NM_016231	Hs.208759	Nemo like kinase	||NLK||Nemo like kinase||	51701	RefSeq	17	17	17q11.2	17q11.2	+	23393311	23547529	ATP binding	negative regulation of Wnt receptor signaling pathway	nucleus
NME1	1.215	0.013	1.047	0.02	0.861	-1.80928	4830	NM_000269	Hs.118638	Non-metastatic cells 1, protein (NM23A) expressed in	||GAAD||NME1||NDPKA||AWD NM23H1B||GZMA-ACTIVATED DNase||NUCLEOSIDE DIPHOSPHATE KINASE-A||AWD, DROSOPHILA, HOMOLOG OF||METASTASIS INHIBITION FACTOR NM23||NONMETASTATIC PROTEIN 23, HOMOLOG 1||NONMETASTATIC CELLS 1, PROTEIN EXPRESSED IN||non-metastatic cells 1, protein (NM23A) expressed in||	4830	RefSeq	17	17	17q21.33	17q21.3	+	46585918	46594449	ATP binding	CTP biosynthesis	nucleus
NME2	1.17	0.004	1.021	0.02	0.873	-1.6998	4831	NM_002512	Hs.463456	Non-metastatic cells 2, protein (NM23B) expressed in	||NM23H2||NDPKB||NME2||NUCLEOSIDE DIPHOSPHATE KINASE-B||NONMETASTATIC PROTEIN 23B||METASTASIS INHIBITION FACTOR NM23B||NONMETASTATIC PROTEIN 23, HOMOLOG 2||NONMETASTATIC CELLS 2, PROTEIN EXPRESSED IN||non-metastatic cells 2, protein (NM23B) expressed in||	4831	RefSeq	17	17	17q21.33	17q21.3	+	46598810	46604103	ATP binding	CTP biosynthesis	nucleus
NME3	1.245	0.029	0.964	0.019	0.774	-2.60308	4832	NM_002513	Hs.514065	Non-metastatic cells 3, protein expressed in	||DR-NM23||NM23H3||NME3||NONMETASTATIC PROTEIN 23, HOMOLOG OF||Non-metastatic cells 3, protein expressed in||NONMETASTATIC CELLS 3, PROTEIN EXPRESSED IN||	4832	RefSeq	16	16	16p13.3	16q13	-	1760322	1761711	ATP binding	CTP biosynthesis
NME4	1.091	0.008	0.966	0.021	0.885	-1.59031	4833	NM_005009	Hs.9235	Non-metastatic cells 4, protein expressed in	||NME4||METASTASIS INHIBITION FACTOR NM23H4||NONMETASTATIC PROTEIN 23, HOMOLOG 4||NONMETASTATIC CELLS 4, PROTEIN EXPRESSED IN||Non-metastatic cells 4, protein expressed in||	4833	RefSeq	16	16	16p13.3	16p13.3	+	387192	390754	ATP binding	CTP biosynthesis	mitochondrion
NME5	1.007	0.032	0.965	0.004	0.958	-0.92425	8382	NM_003551	Hs.519602	Non-metastatic cells 5, protein expressed in (nucleoside-diphosphate kinase)	||NM23H5||NME5||NONMETASTATIC PROTEIN 23, HOMOLOG 5||NONMETASTATIC CELLS 5, PROTEIN EXPRESSED IN||Non-metastatic cells 5, protein expressed in (nucleoside-diphosphate kinase)||	8382	RefSeq	5	5	5q31.2	5q31	-	137478760	137503031	ATP binding	CTP biosynthesis	cellular component unknown
NME6	1.174	0.053	1.023	0.001	0.871	-1.71804	10201	NM_005793	Hs.465558	Non-metastatic cells 6, protein expressed in (nucleoside-diphosphate kinase)	||NME6||NONMETASTATIC CELLS 6, PROTEIN EXPRESSED IN||Non-metastatic cells 6, protein expressed in (nucleoside-diphosphate kinase)||	10201	RefSeq	3	3	3p21.31	3p21	-	48310594	48317852	ATP binding	CTP biosynthesis	cellular component unknown
NME7	1.139	0.025	1.051	0.003	0.923	-1.24359	29922	NM_013330	Hs.551539	Non-metastatic cells 7, protein expressed in (nucleoside-diphosphate kinase)	||NME7||Non-metastatic cells 7, protein expressed in (nucleoside-diphosphate kinase)||	29922	RefSeq	1	1	1q24.2	1q24	-	165833428	166068844	ATP binding	CTP biosynthesis
NPR1	0.906	0.004	0.902	0.028	0.996	-0.577535	4881	NM_000906	Hs.490330	Natriuretic peptide receptor A/guanylate cyclase A (atrionatriuretic peptide receptor A)	||NPR1||GUC2A||ANPRA||ATRIONATRIURETIC PEPTIDE RECEPTOR, TYPE A||ATRIAL NATRIURETIC PEPTIDE RECEPTOR, TYPE A||natriuretic peptide receptor A/guanylate cyclase A (atrionatriuretic peptide receptor A)||	4881	RefSeq	1	1	1q21.3	1q21-q22	+	150464185	150479536	ATP binding	cGMP biosynthesis	integral to plasma membrane
NPR2	1.145	0.056	1.045	0.009	0.912	-1.34396	4882	NM_000907	Hs.78518	Natriuretic peptide receptor B/guanylate cyclase B (atrionatriuretic peptide receptor B)	||NPR2||ANPRB||ATRIONATRIURETIC PEPTIDE RECEPTOR, TYPE B||ATRIAL NATRIURETIC PEPTIDE RECEPTOR, TYPE B||natriuretic peptide receptor B/guanylate cyclase B (atrionatriuretic peptide receptor B)||	4882	RefSeq	9	9	9p13.3	9p21-p12	+	35782405	35799709	ATP binding	cGMP biosynthesis	integral to membrane
NRBP	0.956	0.084	0.935	0.041	0.978	-0.741769	29959	NM_013392	Hs.515876	Nuclear receptor binding protein	||NRBP||NUCLEAR RECEPTOR-BINDING PROTEIN||Nuclear receptor binding protein||	29959	RefSeq	2	2	2p23.3	2p23	+	27563157	27576773	ATP binding	protein amino acid phosphorylation	nucleus
NRG3	1.173	0.015	1.077	0.011	0.918	-1.28921	10718	XM_166086
NTRK1	1.139	0.028	1.057	0.062	0.927	-1.2071	4914	NM_002529	Hs.406293	Neurotrophic tyrosine kinase, receptor, type 1	||TRKA||NTRK1||TYROSINE KINASE RECEPTOR A||Neurotrophic tyrosine kinase, receptor, type 1||	4914	RefSeq	1	1	1q23.1	1q21-q22	+	153643799	153664507	ATP binding	cell differentiation	cytoplasm
NTRK2	1.024	0.043	0.895	0.021	0.874	-1.69067	4915	NM_006180	Hs.494312	Neurotrophic tyrosine kinase, receptor, type 2	||NTRK2||TYROSINE KINASE RECEPTOR B||TRKB OBESITY, HYPERPHAGIA, AND DEVELOPMENTAL DELAY||Neurotrophic tyrosine kinase, receptor, type 2||	4915	RefSeq	9	9	9q21.33	9q22.1	+	84514246	84866963	ATP binding	cell differentiation	integral to plasma membrane
NTRK3	1.031	0.096	0.952	0.037	0.922	-1.25272	4916	NM_002530	Hs.410969	Neurotrophic tyrosine kinase, receptor, type 3	||||NTRK3||Neurotrophic tyrosine kinase, receptor, type 3||		RefSeq	15	15	15q25.3	15q25	-	86221052	86600659	ATP binding	cell differentiation	integral to plasma membrane
NYD-SP25	1.03	0.011	0.918	0.014	0.891	-1.53556	89882	NM_033516	Hs.351815	Protein kinase NYD-SP25	||NYD-SP25||protein kinase NYD-SP25||	89882	RefSeq	9	9	9p24.1	9p24.1	+	6318374	6320914	kinase activity
OSR1	1.094	0.029	1.056	0.07	0.965	-0.860382	9943	NM_005109	Hs.475970	Oxidative-stress responsive 1	||OXSR1||OSR1||OXIDATIVE STRESS-RESPONSIVE 1||Oxidative-stress responsive 1||	9943	RefSeq	3	3	3p22.3	3p22-p21.3	+	38182029	38271979	ATP binding	protein amino acid phosphorylation
P15RS	0.995	0.056	0.877	0.039	0.881	-1.6268	55197	NM_018170	Hs.464912	Hypothetical protein FLJ10656	||P15RS||hypothetical protein FLJ10656||	55197	RefSeq	18	18	18q12.2	18q12.2	-	31823791	31901371	kinase activity
PACE-1	0.942	0.034	0.903	0.049	0.958	-0.92425	57147	NM_020423	Hs.435560	SCY1-like 3 (S. cerevisiae)	||PACE-1||PACE1||SCYL3||SCY1-like 3 (S. cerevisiae)||PROTEIN ASSOCIATED WITH THE C-TERMINAL DOMAIN OF EZRIN||	57147	RefSeq	1	1	1q24.2	1q24.2	-	166553888	166594695	ATP binding	protein amino acid phosphorylation	Golgi apparatus
PACSIN1	1.149	0.042	1.044	0.002	0.908	-1.38045	29993	NM_020804	Hs.520087	Protein kinase C and casein kinase substrate in neurons 1	||PACSIN1||KIAA1379||protein kinase C and casein kinase substrate in neurons 1||	29993	RefSeq	6	6	6p21.31	6p21.3	+	34541882	34610976	protein binding	endocytosis	cytoplasm
PAG	1.168	0.056	1.038	0.046	0.889	-1.55381	55824	NM_018440	Hs.266175	Phosphoprotein associated with glycosphingolipid microdomains 1	||PAG1||PAG||PHOSPHOPROTEIN ASSOCIATED WITH GLYCOSPHINGOLIPID-ENRICHED MICRODOMAINS||Phosphoprotein associated with glycosphingolipid microdomains 1||	55824	RefSeq	8	8	8q21.13	8q21.13	-	82048962	82104809	SH2 domain binding	antimicrobial humoral response (sensu Vertebrata)	integral to plasma membrane
PAK1	1.029	0.01	0.933	0.018	0.907	-1.38958	5058	NM_002576	Hs.435714	P21/Cdc42/Rac1-activated kinase 1 (STE20 homolog, yeast)	||PAK1||p21/Cdc42/Rac1-activated kinase 1 (STE20 homolog, yeast)||	5058	RefSeq	11	11	11q13.5	11q13-q14	-	76710708	76862581	ATP binding	JNK cascade
PAK2	1.077	0.01	1.01	0.005	0.937	-1.11586	5062	NM_002577	Hs.518530	P21 (CDKN1A)-activated kinase 2	||PAK65||PAK2||p21-ACTIVATED KINASE 2||p21-ACTIVATED KINASE, 65-KD||p21 (CDKN1A)-activated kinase 2||	5062	RefSeq	3	3	3q29	3q29	+	197955224	198047662	ATP binding	negative regulation of protein kinase activity
PAK3	1.236	0.038	1.058	0.027	0.855	-1.86403	5063	NM_002578	Hs.390616	P21 (CDKN1A)-activated kinase 3	||||PAK3||P21 (CDKN1A)-activated kinase 3||		RefSeq	X	X	Xq23	Xq22.3-q23	+	110145744	110270305	ATP binding	protein amino acid phosphorylation
PAK4	1.072	0.039	1.039	0.003	0.969	-0.823885	10298	NM_005884	Hs.20447	P21(CDKN1A)-activated kinase 4	||PAK4||p21-ACTIVATED KINASE 4||p21(CDKN1A)-activated kinase 4||	10298	RefSeq	19	19	19q13.2	19q13.2	+	44308301	44361882	ATP binding	cell motility	Golgi apparatus
PAK6	1.068	0.023	1.015	0.017	0.95	-0.997243	56924	NM_020168	Hs.513645	P21(CDKN1A)-activated kinase 6	||PAK6||p21(CDKN1A)-activated kinase 6||p21-ACTIVATED KINASE 6||	56924	RefSeq	15	15	15q15.1	15q14	+	38319367	38356979	ATP binding	protein amino acid phosphorylation
PAK7	1.133	0.036	1.037	0.003	0.915	-1.31659	57144	NM_020341	Hs.32539	P21(CDKN1A)-activated kinase 7	||PAK5||PAK7||KIAA1264||p21-ACTIVATED KINASE 7||p21(CDKN1A)-activated kinase 7||	57144	RefSeq	20	20	20p12.2	20p12	-	9466036	9767522	ATP binding	protein amino acid phosphorylation
PANK1	1.02	0.024	0.946	0.015	0.927	-1.2071	53354	NM_138316	Hs.465933	Pantothenate kinase 1	||PANK1||Pantothenate kinase 1||	53354	RefSeq	10	10	10q23.31	10q23.31	-	91332728	91393627	ATP binding	coenzyme A biosynthesis
PANK3	0.865	0.029	0.9	0.012	1.04	-0.176076	79646	NM_024594	Hs.388400	Pantothenate kinase 3	||||PANK3||Pantothenate kinase 3||		RefSeq	5	5	5q34	5q34	-	167915207	167939166	ATP binding	coenzyme A biosynthesis
PANK4	0.812	0.02	0.804	0.03	0.99	-0.63228	55229	NM_018216	Hs.26156	Pantothenate kinase 4	||PANK4||Pantothenate kinase 4||	55229	RefSeq	1	1	1p36.32	1p36.32	-	2472136	2490197	ATP binding	coenzyme A biosynthesis
PAPSS1	1.197	0.03	1.096	0.001	0.915	-1.31659	9061	NM_005443	Hs.368610	3'-phosphoadenosine 5'-phosphosulfate synthase 1	||ATPSK1||PAPSS1||PAPS SYNTHETASE 1||PAPS SYNTHASE 1||PHOSPHOADENOSINE-PHOSPHOSULFATE SYNTHETASE 1||3-PRIME-@PHOSPHOADENOSINE 5-PRIME-PHOSPHOSULFATE SYNTHASE 1||ATP SULFURYLASE/APS KINASE 1||3'-phosphoadenosine 5'-phosphosulfate synthase 1||ATP SULFURYLASE/ADENOSINE 5-PRIME PHOSPHOSULFATE KINASE 1||	9061	RefSeq	4	4	4q25	4q24	-	108892426	108999023	ATP binding	nucleobase, nucleoside, nucleotide and nucleic acid metabolism	intracellular
PAPSS2	1.094	0.008	1.042	0.02	0.952	-0.978994	9060	NM_004670	Hs.524491	3'-phosphoadenosine 5'-phosphosulfate synthase 2	||PAPSS2||ATPSK2||PAPS SYNTHASE 2||PAPS SYNTHETASE 2||PHOSPHOADENOSINE-PHOSPHOSULFATE SYNTHETASE 2||SEMD, PAKISTANI TYPE||3-PRIME-@PHOSPHOADENOSINE 5-PRIME-PHOSPHOSULFATE SYNTHASE 2||3'-phosphoadenosine 5'-phosphosulfate synthase 2||ATP SULFURYLASE/APS KINASE 2||SK2 SPONDYLOEPIMETAPHYSEAL DYSPLASIA, PAKISTANI TYPE||ATP SULFURYLASE/ADENOSINE 5-PRIME PHOSPHOSULFATE KINASE 2||	9060	RefSeq	10	10	10q23.31	10q23-q24	+	89409607	89496142	ATP binding	nucleobase, nucleoside, nucleotide and nucleic acid metabolism	intracellular
PASK	1.306	0.033	1.087	0.003	0.832	-2.07388	23178	NM_015148	Hs.397891	PAS domain containing serine/threonine kinase	||PASKIN||PASK||KIAA0135||PAS KINASE||PAS DOMAIN-CONTAINING SERINE/THREONINE KINASE||PAS domain containing serine/threonine kinase||	23178	RefSeq	2	2	2q37.3	2q37.3	-	241765504	241808868	ATP binding	protein amino acid phosphorylation
PCK1	0.897	0.01	0.951	0	1.06	0.00640501	5105	NM_002591	Hs.1872	Phosphoenolpyruvate carboxykinase 1 (soluble)	||PCK1||PEPCK1||PEPCK, CYTOSOLIC||PEPCK DEFICIENCY, CYTOSOLIC||Phosphoenolpyruvate carboxykinase 1 (soluble)||PHOSPHOENOLPYRUVATE CARBOXYKINASE 1, SOLUBLE||PEPCKC PHOSPHOENOLPYRUVATE CARBOXYKINASE DEFICIENCY, CYTOSOLIC||	5105	RefSeq	20	20	20q13.32	20q13.31	+	55569542	55574922	GTP binding	gluconeogenesis	cytosol
PCK2	1.077	0.045	1.03	0.037	0.956	-0.942498	5106	NM_004563	Hs.75812	Phosphoenolpyruvate carboxykinase 2 (mitochondrial)	||PCK2||PEPCK DEFICIENCY, MITOCHONDRIAL||PHOSPHOENOLPYRUVATE CARBOXYKINASE 2, MITOCHONDRIAL||Phosphoenolpyruvate carboxykinase 2 (mitochondrial)||PEPCK2 PHOSPHOENOLPYRUVATE CARBOXYKINASE DEFICIENCY, MITOCHONDRIAL||	5106	RefSeq	14	14	14q11.2	14q11.2	+	23633388	23643173	GTP binding	gluconeogenesis	mitochondrion
PCTK1	1.105	0.038	0.952	0.046	0.862	-1.80016	5127	NM_006201	Hs.496068	PCTAIRE protein kinase 1	||PCTK1||PCTAIRE1||PCTAIRE protein kinase 1||	5127	RefSeq	X	X	Xp11.3	Xp11.3-p11.23	+	46834368	46845646	ATP binding	protein amino acid phosphorylation
PCTK2	1.147	0.025	1.107	0.012	0.965	-0.860382	5128	NM_002595	Hs.506415	PCTAIRE protein kinase 2	||PCTK2||PCTAIRE2||PCTAIRE protein kinase 2||	5128	RefSeq	12	12	12q23.1	12q23.1	-	95174507	95296691	ATP binding	protein amino acid phosphorylation
PCTK3	0.911	0.034	0.935	0.001	1.025	-0.312937	5129	NM_002596	Hs.445402	PCTAIRE protein kinase 3	||PCTK3||PCTAIRE3||PCTAIRE protein kinase 3||	5129	RefSeq	1	1	1q32.1	1q31-q32	+	202205383	202233572	ATP binding	protein amino acid phosphorylation	cellular component unknown
PDGFRA	0.895	0.033	0.887	0.003	0.99	-0.63228	5156	NM_006206	Hs.74615	Platelet-derived growth factor receptor, alpha polypeptide	||PDGFRA||PDGFRA/FIP1L1 FUSION GENE||PDGFR2 PDGFRA/BCR FUSION GENE||Platelet-derived growth factor receptor, alpha polypeptide||	5156	RefSeq	4	4	4q12	4q11-q13	+	54936129	55005339	ATP binding	cell proliferation	integral to plasma membrane
PDGFRB	0.953	0.023	0.977	0.03	1.025	-0.312937	5159	NM_002609	Hs.509067	Platelet-derived growth factor receptor, beta polypeptide	||PDGFRB||PDGFRB/RABPT5 FUSION GENE||PDGFRB/D10S170 FUSION GENE||PDGFRB/HIP1 FUSION GENE||PDGFR1 PDGFRB/ETV6 FUSION GENE||Platelet-derived growth factor receptor, beta polypeptide||	5159	RefSeq	5	5	5q32	5q31-q32	-	149473595	149515503	ATP binding	protein amino acid phosphorylation	integral to membrane
PDK1	1.229	0.033	1.083	0	0.881	-1.6268	5163	NM_002610	Hs.470633	Pyruvate dehydrogenase kinase, isoenzyme 1	||PDK1||Pyruvate dehydrogenase kinase, isoenzyme 1||	5163	RefSeq	2	2	2q31.1	2q31.1	+	173246285	173289369	ATP binding	glucose metabolism	mitochondrion
PDK2	1.145	0.019	1.052	0.026	0.919	-1.28009	5164	NM_002611	Hs.256667	Pyruvate dehydrogenase kinase, isoenzyme 2	||PDK2||Pyruvate dehydrogenase kinase, isoenzyme 2||	5164	RefSeq	17	17	17q21.33	17q21.33	+	45527694	45543421	ATP binding	glucose metabolism	mitochondrion
PDK3	1.146	0.006	1.058	0.002	0.922	-1.25272	5165	NM_005391	Hs.444422	Pyruvate dehydrogenase kinase, isoenzyme 3	||PDK3||Pyruvate dehydrogenase kinase, isoenzyme 3||	5165	RefSeq	X	X	Xp22.11	Xp22.11	+	24243210	24312199	ATP binding	glucose metabolism	mitochondrion
PDK4	1.023	0.029	0.955	0.01	0.933	-1.15235	5166	NM_002612	Hs.8364	Pyruvate dehydrogenase kinase, isoenzyme 4	||PDK4||Pyruvate dehydrogenase kinase, isoenzyme 4||	5166	RefSeq	7	7	7q21.3	7q21.3-q22.1	-	94857461	94870454	ATP binding	glucose metabolism	mitochondrion
PDPK1	1.121	0.019	0.958	0.017	0.854	-1.87315	5170	NM_002613	Hs.459691	3-phosphoinositide dependent protein kinase-1	||PDPK1||PDK1||3-phosphoinositide dependent protein kinase-1||3-@PHOSPHOINOSITIDE-DEPENDENT PROTEIN KINASE 1||	5170	RefSeq	16	16	16p13.3	16p13.3	+	2527981	2588352	3-phosphoinositide-dependent protein kinase activity	actin cytoskeleton organization and biogenesis	cytoplasm
PFKFB1	1.023	0.014	0.975	0.046	0.952	-0.978994	5207	NM_002625	Hs.444304	6-phosphofructo-2-kinase/fructose-2,6-biphosphatase 1	||PFRX||PFKFB1||PFKFB, LIVER||6-phosphofructo-2-kinase/fructose-2,6-biphosphatase 1||6-@PHOSPHOFRUCTO-2-KINASE/FRUCTOSE-2,6-BISPHOSPHATASE 1||	5207	RefSeq	X	X	Xp11.21	Xp11.21	-	54842610	54903532	ATP binding	fructose 2,6-bisphosphate metabolism
PFKFB2	1.013	0.028	0.969	0.009	0.956	-0.942498	5208	NM_006212	Hs.282702	6-phosphofructo-2-kinase/fructose-2,6-biphosphatase 2	||PFKFB2||6-phosphofructo-2-kinase/fructose-2,6-biphosphatase 2||PFKFB, CARDIAC||6-@PHOSPHOFRUCTO-2-KINASE/FRUCTOSE-2,6-BISPHOSPHATASE 2||	5208	RefSeq	1	1	1q32.2	1q31	+	203615037	203634707	6-phosphofructo-2-kinase activity	fructose 2,6-bisphosphate metabolism
PFKFB3	1.143	0.027	1.118	0.039	0.977	-0.750893	5209	NM_004566	Hs.195471	6-phosphofructo-2-kinase/fructose-2,6-biphosphatase 3	||IPFK2||PFKFB3||PFKFB, PLACENTAL||6-phosphofructo-2-kinase/fructose-2,6-biphosphatase 3||6-@PHOSPHOFRUCTO-2-KINASE/FRUCTOSE-2,6-BISPHOSPHATASE 3||PFK2, INDUCIBLE||	5209	RefSeq	10	10	10p15.1	10p14-p15	+	6284900	6317500	6-phosphofructo-2-kinase activity	fructose 2,6-bisphosphate metabolism	cellular component unknown
PFKFB4	0.812	0.019	0.873	0	1.074	0.134142	5210	NM_004567	Hs.476217	6-phosphofructo-2-kinase/fructose-2,6-biphosphatase 4	||PFKFB4||6-phosphofructo-2-kinase/fructose-2,6-biphosphatase 4||6-@PHOSPHOFRUCTO-2-KINASE/FRUCTOSE-2,6-BISPHOSPHATASE 4||PFKFB, TESTIS||	5210	RefSeq	3	3	3p21.31	3p22-p21	-	48530122	48569231	6-phosphofructo-2-kinase activity	fructose 2,6-bisphosphate metabolism	cellular component unknown
PFKL	1.18	0.011	1.064	0.044	0.901	-1.44432	5211	NM_002626	Hs.255093	Phosphofructokinase, liver	||PFKL||Phosphofructokinase, liver||PFK, LIVER TYPE||PHOSPHOFRUCTOKINASE, LIVER TYPE||	5211	RefSeq	21	21	21q22.3	21q22.3	+	44544357	44571684	6-phosphofructokinase activity	fructose 6-phosphate metabolism	6-phosphofructokinase complex
PFKM	1.099	0.043	1.028	0	0.934	-1.14323	5213	NM_000289	Hs.75160	Phosphofructokinase, muscle	||PFKM||PFKM DEFICIENCY||Phosphofructokinase, muscle||MUSCLE PHOSPHOFRUCTOKINASE DEFICIENCY||GLYCOGEN STORAGE DISEASE VII||GLYCOGEN DISEASE OF MUSCLE||TARUI DISEASE PHOSPHOFRUCTOKINASE, MUSCLE TYPE||	5213	RefSeq	12	12	12q13.11	12q13.3	+	46802814	46826154	6-phosphofructokinase activity	glucose metabolism	6-phosphofructokinase complex
PFKP	1.091	0.005	1.025	0.022	0.939	-1.09761	5214	NM_002627	Hs.26010	Phosphofructokinase, platelet	||PFKF||PFKP||Phosphofructokinase, platelet||PFK, FIBROBLAST TYPE||PHOSPHOFRUCTOKINASE, PLATELET TYPE||PFK, PLATELET TYPE||	5214	RefSeq	10	10	10p15.2	10p15.3-p15.2	+	3099751	3168995	6-phosphofructokinase activity	glycolysis	6-phosphofructokinase complex
PFTK1	1.258	0.009	1.042	0.042	0.828	-2.11038	5218	NM_012395	Hs.430742	PFTAIRE protein kinase 1	||PFTK1||PFTAIRE protein kinase 1||	5218	RefSeq	7	7	7q21.13	7q21-q22	+	89983362	90484555	ATP binding	protein amino acid phosphorylation	cytoplasm
PGK1	1.245	0.001	1.135	0.013	0.912	-1.34396	5230	NM_000291	Hs.78771	Phosphoglycerate kinase 1	||PGK1P2||PGK1||3-@PHOSPHOGLYCEROKINASE||PGK1P1||Phosphoglycerate kinase 1||PHOSPHOGLYCERATE KINASE 1 PSEUDOGENE 2||PGKA PHOSPHOGLYCERATE KINASE 1 PSEUDOGENE 1||	5230	RefSeq	X	X	Xq21.1	Xq13	+	77165913	77188467	ATP binding	glycolysis
PGK2	1.166	0.046	0.995	0.013	0.853	-1.88228	5232	NM_138733	Hs.367727	Phosphoglycerate kinase 2	||PGK2||PGKB||PGK, TESTICULAR||Phosphoglycerate kinase 2||PHOSPHOGLYCERATE KINASE OF SPERMATOZOA||	5232	RefSeq	6	6	6p12.3	6p12.3	-	49861324	49862966	ATP binding	glycolysis	cytosol
PHKA1	1.047	0.006	0.975	0.004	0.93	-1.17972	5255	NM_002637	Hs.201379	Phosphorylase kinase, alpha 1 (muscle)	||PHKA1||PHKA1 MUSCLE GLYCOGENOSIS, X-LINKED||PHOSPHORYLASE KINASE, MUSCLE, ALPHA-1 SUBUNIT||Phosphorylase kinase, alpha 1 (muscle)||	5255	RefSeq	X	X	Xq13.1	Xq12-q13	-	71583501	71716903	calmodulin binding	carbohydrate metabolism
PHKA2	1.029	0.042	0.98	0.003	0.952	-0.978994	5256	NM_000292	Hs.54941	Phosphorylase kinase, alpha 2 (liver)	||PYKL||PHKA2||XLG2||GLYCOGENOSIS VIIIA||X-LINKED LIVER GLYCOGENOSIS||GLYCOGEN STORAGE DISEASE IX||HEPATIC PHOSPHORYLASE KINASE DEFICIENCY||GLYCOGEN STORAGE DISEASE VIII||LIVER GLYCOGENOSIS, X-LINKED, TYPE II||Phosphorylase kinase, alpha 2 (liver)||PHOSPHORYLASE KINASE DEFICIENCY OF LIVER||XLG PHOSPHORYLASE KINASE, LIVER, ALPHA-2 SUBUNIT||	5256	RefSeq	X	X	Xp22.13	Xp22.2-p22.1	-	18670535	18761833	calmodulin binding	carbohydrate metabolism	phosphorylase kinase complex
PHKG1	1.112	0.034	1.015	0.037	0.913	-1.33483	5260	NM_006213	Hs.512612	Phosphorylase kinase, gamma 1 (muscle)	||PHKG1||PHOSPHORYLASE KINASE, MUSCLE, GAMMA-1||Phosphorylase kinase, gamma 1 (muscle)||	5260	RefSeq	7	7	7p11.2	7p12-q21	-	55922185	55934836	ATP binding	carbohydrate metabolism	phosphorylase kinase complex
PHKG2	1.088	0.044	1.006	0	0.924	-1.23447	5261	NM_000294	Hs.196177	Phosphorylase kinase, gamma 2 (testis)	||PHKG2||PHOSPHORYLASE KINASE, TESTIS/LIVER, GAMMA-2||Phosphorylase kinase, gamma 2 (testis)||PHKG2 CIRRHOSIS DUE TO LIVER PHOSPHORYLASE KINASE DEFICIENCY||	5261	RefSeq	16	16	16p11.2	16p12.1-p11.2	+	30667237	30676183	ATP binding	carbohydrate metabolism	phosphorylase kinase complex
PI4K2B	1.043	0.032	1.055	0.005	1.011	-0.440674	55300	NM_018323	Hs.443733	Phosphatidylinositol 4-kinase type-II beta	||PI4K2B||phosphatidylinositol 4-kinase type-II beta||	55300	RefSeq	4	4	4p15.2	4p15.2	+	24911943	24956979	kinase activity
PI4KII	0.994	0.001	0.991	0.009	0.997	-0.568411	55361	NM_018425	Hs.25300	Phosphatidylinositol 4-kinase type II	||PI4KII||phosphatidylinositol 4-kinase type II||	55361	RefSeq	10	10	10q24.2	10q24	+	99390432	99426177	1-phosphatidylinositol 4-kinase activity	phosphatidylinositol biosynthesis	integral to plasma membrane
PIK3C2A	0.999	0.018	1.086	0.025	1.087	0.252755	5286	NM_002645	Hs.175343	Phosphoinositide-3-kinase, class 2, alpha polypeptide	||PIK3C2A||CPK||C2-CONTAINING PHOSPHATIDYLINOSITOL KINASE||PHOSPHATIDYLINOSITOL 3-KINASE, CLASS 2, ALPHA||Phosphoinositide-3-kinase, class 2, alpha polypeptide||	5286	RefSeq	11	11	11p15.1	11p15.5-p14	-	17067860	17147864	inositol or phosphatidylinositol kinase activity	intracellular signaling cascade	phosphoinositide 3-kinase complex
PIK3C2B	1.147	0.031	1.111	0.002	0.968	-0.833009	5287	NM_002646	Hs.497487	Phosphoinositide-3-kinase, class 2, beta polypeptide	||PIK3C2B||PHOSPHATIDYLINOSITOL 3-KINASE, CLASS 2, BETA||Phosphoinositide-3-kinase, class 2, beta polypeptide||	5287	RefSeq	1	1	1q32.1	1q32	-	201123420	201191131	inositol or phosphatidylinositol kinase activity	intracellular signaling cascade	microsome
PIK3C2G	0.896	0.002	0.933	0.015	1.041	-0.166952	5288	NM_004570	Hs.22500	Phosphoinositide-3-kinase, class 2, gamma polypeptide	||PIK3C2G||Phosphoinositide-3-kinase, class 2, gamma polypeptide||PHOSPHATIDYLINOSITOL 3-KINASE, CLASS 2, GAMMA||	5288	RefSeq	12	12	12p12.3	12p12	+	18305740	18692615	phosphatidylinositol 3-kinase activity	intracellular signaling cascade	membrane
PIK3CA	1.203	0.051	1.073	0.008	0.891	-1.53556	5290	NM_006218	Hs.553498	Phosphoinositide-3-kinase, catalytic, alpha polypeptide	||PIK3CA||p110-ALPHA||Phosphoinositide-3-kinase, catalytic, alpha polypeptide||PHOSPHATIDYLINOSITOL 3-KINASE, CATALYTIC, ALPHA||PHOSPHATIDYLINOSITOL 3-KINASE, CATALYTIC, 110-KD, ALPHA||	5290	RefSeq	3	3	3q26.32	3q26.3	+	180399306	180435057	inositol or phosphatidylinositol kinase activity	signal transduction	phosphoinositide 3-kinase complex
PIK3CB	1.032	0.028	1	1.122	0.969	-0.823885	5291	NM_006219	Hs.239818	Phosphoinositide-3-kinase, catalytic, beta polypeptide	||p110-BETA||PI3KCB||PIK3CB||Phosphoinositide-3-kinase, catalytic, beta polypeptide||PHOSPHATIDYLINOSITOL 3-KINASE, CATALYTIC, BETA||PHOSPHATIDYLINOSITOL 3-KINASE, CATALYTIC, 110-KD, BETA||	5291	RefSeq	3	3	3q22.3	3q22.3	-	139856928	139960883	inositol or phosphatidylinositol kinase activity	G-protein coupled receptor protein signaling pathway	phosphoinositide 3-kinase complex
PIK3CG	1.127	0.01	1.041	0.002	0.924	-1.23447	5294	NM_002649	Hs.32942	Phosphoinositide-3-kinase, catalytic, gamma polypeptide	||p110-GAMMA||PIK3CG||PHOSPHATIDYLINOSITOL 3-KINASE, CATALYTIC, GAMMA||Phosphoinositide-3-kinase, catalytic, gamma polypeptide||PHOSPHATIDYLINOSITOL 3-KINASE, CATALYTIC, 110-KD, GAMMA||	5294	RefSeq	7	7	7q22.3	7q22.3	+	106099874	106141543	inositol or phosphatidylinositol kinase activity	G-protein coupled receptor protein signaling pathway	phosphoinositide 3-kinase complex
PIK3R1	0.957	0.023	0.978	0.01	1.022	-0.34031	5295	NM_181504	Hs.132225	Phosphoinositide-3-kinase, regulatory subunit 1 (p85 alpha)	||GRB1||PIK3R1||PHOSPHATIDYLINOSITOL 3-KINASE-ASSOCIATED p85-ALPHA||PHOSPHATIDYLINOSITOL 3-KINASE, REGULATORY, 1||PHOSPHATIDYLINOSITOL 3-KINASE, REGULATORY, 85-KD, ALPHA||Phosphoinositide-3-kinase, regulatory subunit 1 (p85 alpha)||	5295	RefSeq	5	5	5q13.1	5q13.1	+	67622250	67633403	kinase activity	intracellular signaling cascade	phosphoinositide 3-kinase complex
PIK3R2	1.093	0.041	0.999	0.013	0.913	-1.33483	5296	NM_005027	Hs.371344	Phosphoinositide-3-kinase, regulatory subunit 2 (p85 beta)	||PIK3R2||PHOSPHATIDYLINOSITOL 3-KINASE, REGULATORY, 2||p85-BETA PIK3R2/UPS8 FUSION GENE||PHOSPHATIDYLINOSITOL 3-KINASE, REGULATORY, 85-KD, BETA||Phosphoinositide-3-kinase, regulatory subunit 2 (p85 beta)||	5296	RefSeq	19	19	19p13.11	19q13.2-q13.4	+	18125015	18142343	contributes_to phosphatidylinositol 3-kinase activity	insulin receptor signaling pathway	phosphoinositide 3-kinase complex
PIK3R3	0.983	0.004	1.003	0.026	1.02	-0.358558	8503	NM_003629	Hs.170510	Phosphoinositide-3-kinase, regulatory subunit 3 (p55, gamma)	||PIK3R3||p55-GAMMA||PHOSPHATIDYLINOSITOL 3-KINASE, REGULATORY, 3||PHOSPHATIDYLINOSITOL 3-KINASE, REGULATORY, 55-KD, GAMMA||Phosphoinositide-3-kinase, regulatory subunit 3 (p55, gamma)||	8503	RefSeq	1	1	1p34.1	1p34.1	-	46217832	46310334	kinase activity	insulin receptor signaling pathway	phosphoinositide 3-kinase complex
PIK3R4	0.907	0.01	0.947	0.027	1.043	-0.148704	30849	NM_014602	Hs.149032	Phosphoinositide-3-kinase, regulatory subunit 4, p150	||PIK3R4||VPS15, YEAST, HOMOLOG OF||PHOSPHATIDYLINOSITOL 3-KINASE, REGULATORY, 4||Phosphoinositide-3-kinase, regulatory subunit 4, p150||	30849	RefSeq	3	3	3q21.3	3q21.3	-	131880475	131948348	ATP binding	meiosis	cellular component unknown
PIK4CA	0.855	0.01	0.922	0.023	1.078	0.170638	5297	NM_002650	Hs.529438	Phosphatidylinositol 4-kinase, catalytic, alpha polypeptide	||PIK4CA||PHOSPHATIDYLINOSITOL 4-KINASE, TYPE II, ALPHA||Phosphatidylinositol 4-kinase, catalytic, alpha polypeptide||PI4K-ALPHA PHOSPHATIDYLINOSITOL 4-KINASE, TYPE III, ALPHA||	5297	RefSeq	22	22	22q11.21	22q11.21	-	19386544	19413509	1-phosphatidylinositol 4-kinase activity	phosphatidylinositol biosynthesis	Golgi vesicle
PIK4CB	0.853	0.004	0.92	0.027	1.078	0.170638	5298	NM_002651	Hs.527624	Phosphatidylinositol 4-kinase, catalytic, beta polypeptide	||PIK4CB||PI4K-BETA||PHOSPHATIDYLINOSITOL 4-KINASE, WORTMANNIN-SENSITIVE||Phosphatidylinositol 4-kinase, catalytic, beta polypeptide||PHOSPHATIDYLINOSITOL 4-KINASE, TYPE III, BETA||	5298	RefSeq	1	1	1q21.2	1q21	-	148077485	148111797	1-phosphatidylinositol 4-kinase activity	phosphatidylinositol biosynthesis	Golgi apparatus
PIM1	1.004	0.01	1.006	0.01	1.001	-0.531915	5292	NM_002648	Hs.81170	Pim-1 oncogene	||PIM1||Pim-1 oncogene||ONCOGENE PIM 1||	5292	RefSeq	6	6	6p21.2	6p21.2	+	37245963	37251180	ATP binding	development	cytoplasm
PIM2	0.876	0.058	0.919	0.012	1.048	-0.103084	11040	NM_006875	Hs.496096	Pim-2 oncogene	||PIM2||ONCOGENE PIM2||Pim-2 oncogene||	11040	RefSeq	X	X	Xp11.23	Xp11.23	-	48526708	48532532	ATP binding	cell proliferation
PINK1	1.005	0.009	1.004	0.022	0.999	-0.550163	65018	NM_032409	Hs.389171	PTEN induced putative kinase 1	||PINK1||PTEN-INDUCED PUTATIVE KINASE 1||PTEN induced putative kinase 1||	65018	RefSeq	1	1	1p36.12	1p36	+	20705253	20723309	ATP binding	protein amino acid phosphorylation	mitochondrion
PIP5K1A	0.957	0.057	0.941	0.002	0.982	-0.705272	8394	NM_003557	Hs.546316	Phosphatidylinositol-4-phosphate 5-kinase, type I, alpha	||PIP5K1A||phosphatidylinositol-4-phosphate 5-kinase, type I, alpha||	8394	RefSeq	1	1	1q21.2	1q22-q24	+	147984144	148035078	1-phosphatidylinositol-4-phosphate 5-kinase activity	glycerophospholipid metabolism	cellular component unknown
PIP5K2A	1.156	0.007	1.103	0.007	0.953	-0.96987	5305	NM_005028	Hs.499029	Phosphatidylinositol-4-phosphate 5-kinase, type II, alpha	||PIP5K2A||PI5P4KA||PHOSPHATIDYLINOSITOL-5-PHOSPHATE 4-KINASE, ALPHA||phosphatidylinositol-4-phosphate 5-kinase, type II, alpha||	5305	RefSeq	10	10	10p12.2	10p12.32	-	22865828	23043490	1-phosphatidylinositol-4-phosphate 5-kinase activity	glycerophospholipid metabolism	cellular component unknown
PIP5K2B	0.965	0.001	0.998	0.023	1.033	-0.239945	8396	NM_003559	Hs.260603	Phosphatidylinositol-4-phosphate 5-kinase, type II, beta	||PIP5K2B||PI5P4KB||PHOSPHATIDYLINOSITOL-5-PHOSPHATE 4-KINASE, BETA||phosphatidylinositol-4-phosphate 5-kinase, type II, beta||	8396	RefSeq	17	17	17q12	17q12	-	34177323	34209684	1-phosphatidylinositol-4-phosphate 5-kinase activity	cell surface receptor linked signal transduction	cytoplasm
PIP5K2C	1	0.011	0.915	0.004	0.914	-1.32571	79837	NM_024779	Hs.144502	Phosphatidylinositol-4-phosphate 5-kinase, type II, gamma	||PIP5K2C||phosphatidylinositol-4-phosphate 5-kinase, type II, gamma||	79837	RefSeq	12	12	12q13.3	12q13.3	+	56271323	56283296	1-phosphatidylinositol-4-phosphate 5-kinase activity
PITPNM3	1.046	0.008	0.97	0.036	0.927	-1.2071	83394	NM_031220	Hs.183983	PITPNM family member 3	||NIR1||PITPNM3||PITPNM family member 3||PHOSPHATIDYLINOSITOL TRANSFER PROTEIN, MEMBRANE-ASSOCIATED, 3||PYK2 N-TERMINAL DOMAIN-INTERACTING RECEPTOR 1||	83394	RefSeq	17	17	17p13.2	17p13	-	6299348	6400601	calcium ion binding	phosphoinositide metabolism	integral to membrane
STK32C	0.97	0.056	0.901	0.004	0.928	-1.19797	282974	NM_173575	Hs.469002	Serine/threonine kinase 32C	||STK32C||serine/threonine kinase 32C||	282974	RefSeq	10	10	10q26.3	10q26.3	-	133870985	133971467	ATP binding	protein amino acid phosphorylation
PKIA	1.049	0.065	0.939	0.001	0.895	-1.49907	5569	NM_006823	Hs.433700	Protein kinase (cAMP-dependent, catalytic) inhibitor alpha	||PKIA||protein kinase (cAMP-dependent, catalytic) inhibitor alpha||PROTEIN KINASE, cAMP-DEPENDENT CATALYTIC, INHIBITOR ALPHA||	5569	RefSeq	8	8	8q21.12	8q21.11	+	79590890	79678040	cAMP-dependent protein kinase inhibitor activity	negative regulation of protein kinase activity
PKIB	1.102	0.019	0.936	0	0.849	-1.91877	5570	NM_032471	Hs.486354	Protein kinase (cAMP-dependent, catalytic) inhibitor beta	||PKIB||protein kinase (cAMP-dependent, catalytic) inhibitor beta||PROTEIN KINASE, cAMP-DEPENDENT CATALYTIC, INHIBITOR BETA||	5570	RefSeq	6	6	6q22.31	6q22.31	+	122973075	123089216	cAMP-dependent protein kinase inhibitor activity	negative regulation of protein kinase activity
PKLR	1.081	0.035	0.94	0.001	0.869	-1.73629	5313	NM_000298	Hs.95990	Pyruvate kinase, liver and RBC	||PKLR||PK1||PKRL||PYRUVATE KINASE 1||PYRUVATE KINASE, LIVER TYPE||pyruvate kinase, liver and RBC||PYRUVATE KINASE DEFICIENCY OF ERYTHROCYTE||PYRUVATE KINASE, RED CELL TYPE||PK DEFICIENCY PYRUVATE KINASE, LIVER AND RED BLOOD CELL||	5313	RefSeq	1	1	1q22	1q21	-	152072702	152084298	magnesium ion binding	glycolysis
PKM2	1.058	0.012	0.95	0.02	0.898	-1.47169	5315	NM_002654	Hs.198281	Pyruvate kinase, muscle	||PK3||OIP3||PKM2||THBP1||PYRUVATE KINASE 3||Pyruvate kinase, muscle||OPA-INTERACTING PROTEIN 3||PK, MUSCLE TYPE||THYROID HORMONE-BINDING PROTEIN, CYTOSOLIC||	5315	RefSeq	15	15	15q23	15q22	-	70278423	70310738	magnesium ion binding	glycolysis	cytosol
PKMYT1	0.947	0.002	0.922	0.006	0.974	-0.778265	9088	NM_004203	Hs.77783	Protein kinase, membrane associated tyrosine/threonine 1	||PKMYT1||CDC2-INHIBITORY KINASE, MEMBRANE-ASSOCIATED AND TYROSINE/THREONINE-SPECIFIC, 1||Protein kinase, membrane associated tyrosine/threonine 1||	9088	RefSeq	16	16	16p13.3	16p13.3	-	2962794	2970475	ATP binding	cell cycle	Golgi apparatus
PKN3	0.996	0.028	0.941	0.003	0.944	-1.05199	29941	NM_013355	Hs.300485	Protein kinase N3	||PKN3||protein kinase N3||	29941	RefSeq	9	9	9q34.11	9q34.11	+	128544355	128562752	ATP binding	protein amino acid phosphorylation	Golgi apparatus
PLK1	1.08	0.013	1.016	0.02	0.941	-1.07936	5347	NM_005030	Hs.329989	Polo-like kinase 1 (Drosophila)	||PLK1||STPK13||SERINE/THREONINE PROTEIN KINASE 13||polo-like kinase 1 (Drosophila)||	5347	RefSeq	16	16	16p12.1	16p12.1	+	23597701	23609191	ATP binding	cell proliferation	nucleus
EXOSC10	1.089	0.026	0.98	0.022	0.899	-1.46257	5394	NM_002685	Hs.321234	Exosome component 10	||PMSCL2||EXOSC10||POLYMYOSITIS/SCLERODERMA AUTOANTIGEN, 100-KD||PMSCL AUTOANTIGEN, 100-KD||POLYMYOSITIS/SCLERODERMA AUTOANTIGEN 2||Exosome component 10||	5394	RefSeq	1	1	1p36.22	1p36.22	-	11060942	11094204	3'-5' exonuclease activity	mRNA catabolism, nonsense-mediated decay	nucleolus
PMVK	1.117	0.011	0.995	0.008	0.89	-1.54469	10654	NM_006556	Hs.30954	Phosphomevalonate kinase	||PMVK||PMKase||Phosphomevalonate kinase||	10654	RefSeq	1	1	1q22	1p13-q23	-	151710280	151722540	phosphomevalonate kinase activity	cholesterol biosynthesis	cytoplasm
PNKP	0.984	0.018	0.97	0.01	0.986	-0.668776	11284	NM_007254	Hs.78016	Polynucleotide kinase 3'-phosphatase	||PNKP||DNA KINASE||Polynucleotide kinase 3'-phosphatase||POLYNUCLEOTIDE KINASE 3-PRIME PHOSPHATASE||	11284	RefSeq	19	19	19q13.33	19q13.3-q13.4	-	55056273	55062630	ATP binding	DNA damage response, perception of DNA damage	nucleus
PPP1R1B	1.154	0.027	0.97	0.023	0.84	-2.00089	84152	NM_032192	Hs.286192	Protein phosphatase 1, regulatory (inhibitor) subunit 1B (dopamine and cAMP regulated phosphoprotein, DARPP-32)	||DARPP32||PPP1R1B||DOPAMINE- AND cAMP-REGULATED PHOSPHOPROTEIN, 32-KD||PROTEIN PHOSPHATASE 1, REGULATORY SUBUNIT 1B||protein phosphatase 1, regulatory (inhibitor) subunit 1B (dopamine and cAMP regulated phosphoprotein, DARPP-32)||	84152	RefSeq	17	17	17q12	17q12	+	35036704	35046403	protein kinase inhibitor activity	signal transduction	cytoplasm
PPP2CA	1.013	0.049	0.926	0.01	0.913	-1.33483	5515	NM_002715	Hs.483408	Protein phosphatase 2 (formerly 2A), catalytic subunit, alpha isoform	||PPP2CA||PROTEIN PHOSPHATASE 2A, CATALYTIC SUBUNIT, ALPHA ISOFORM||protein phosphatase 2 (formerly 2A), catalytic subunit, alpha isoform||	5515	RefSeq	5	5	5q31.1	5q31.1	-	133560319	133589661	hydrolase activity	RNA splicing	cytosol
PPP2CB	1.227	0.001	1.025	0.014	0.835	-2.04651	5516	NM_004156	Hs.491440	Protein phosphatase 2 (formerly 2A), catalytic subunit, beta isoform	||PPP2CB||PROTEIN PHOSPHATASE 2A, CATALYTIC SUBUNIT, BETA ISOFORM||protein phosphatase 2 (formerly 2A), catalytic subunit, beta isoform||	5516	RefSeq	8	8	8p12	8p12	-	30762707	30789486	contributes_to protein phosphatase type 2A activity	protein amino acid dephosphorylation	protein phosphatase type 2A complex
PPP4C	0.923	0.064	0.874	0.003	0.947	-1.02461	5531	NM_002720	Hs.534338	Protein phosphatase 4 (formerly X), catalytic subunit	||PPX||PPP4C||PROTEIN PHOSPHATASE X||SERINE/THREONINE PROTEIN PHOSPHATASE 4||PROTEIN PHOSPHATASE 4, CATALYTIC SUBUNIT||protein phosphatase 4 (formerly X), catalytic subunit||	5531	RefSeq	16	16	16p11.2	16p12-16p11	+	29994884	30004196	NF-kappaB-inducing kinase activity	microtubule cytoskeleton organization and biogenesis	centrosome
PRKAA1	0.793	0.001	0.782	0	0.986	-0.668776	5562	NM_006251	Hs.43322	Protein kinase, AMP-activated, alpha 1 catalytic subunit	||PRKAA1||AMPK-ALPHA-1||AMP-ACTIVATED PROTEIN KINASE, CATALYTIC, ALPHA-1||PROTEIN KINASE, AMP-ACTIVATED, CATALYTIC, ALPHA-1||protein kinase, AMP-activated, alpha 1 catalytic subunit||	5562	RefSeq	5	5	5p13.1	5p12	-	40795238	40834046	ATP binding	activation of MAPK	intracellular
PRKAA2	0.907	0.024	0.765	0.004	0.843	-1.97352	5563	NM_006252	Hs.256067	Protein kinase, AMP-activated, alpha 2 catalytic subunit	||PRKAA2||AMPK-ALPHA-2||AMP-ACTIVATED PROTEIN KINASE, CATALYTIC, ALPHA-2||PROTEIN KINASE, AMP-ACTIVATED, CATALYTIC, ALPHA-2||protein kinase, AMP-activated, alpha 2 catalytic subunit||	5563	RefSeq	1	1	1p32.2	1p31	+	56823040	56886142	ATP binding	cholesterol biosynthesis
PRKACA	0.84	0.018	0.79	0.008	0.94	-1.08848	5566	NM_002730	Hs.194350	Protein kinase, cAMP-dependent, catalytic, alpha	||PRKACA||PROTEIN KINASE, cAMP-DEPENDENT, CATALYTIC, ALPHA||	5566	RefSeq	19	19	19p13.12	19p13.1	-	14063508	14089559	ATP binding	protein amino acid phosphorylation	cAMP-dependent protein kinase complex
PRKACB	0.933	0.031	0.949	0.037	1.017	-0.38593	5567	NM_002731	Hs.487325	Protein kinase, cAMP-dependent, catalytic, beta	||PRKACB||PROTEIN KINASE, cAMP-DEPENDENT, CATALYTIC, BETA||	5567	RefSeq	1	1	1p31.1	1p36.1	+	84255765	84416200	ATP binding	protein amino acid phosphorylation	nucleus
PRKACG	1.127	2.524	1.033	0.003	0.916	-1.30746	5568	NM_002732	Hs.158029	Protein kinase, cAMP-dependent, catalytic, gamma	||PRKACG||PROTEIN KINASE, cAMP-DEPENDENT, CATALYTIC, GAMMA||	5568	RefSeq	9	9	9q21.11	9q13	-	68857004	68858562	ATP binding	male gonad development
PRKAG1	1.012	0.044	0.976	0.01	0.964	-0.869506	5571	NM_002733	Hs.530862	Protein kinase, AMP-activated, gamma 1 non-catalytic subunit	||PRKAG1||AMPK-GAMMA-1||PROTEIN KINASE, AMP-ACTIVATED, NONCATALYTIC, GAMMA-1||AMP-ACTIVATED PROTEIN KINASE, NONCATALYTIC, GAMMA-1||protein kinase, AMP-activated, gamma 1 non-catalytic subunit||	5571	RefSeq	12	12	12q13.12	12q12-q14	-	47682322	47698859	cAMP-dependent protein kinase activity	fatty acid biosynthesis
PRKAG3	0.938	0.011	0.93	0.011	0.991	-0.623156	53632	NM_017431	Hs.434525	Protein kinase, AMP-activated, gamma 3 non-catalytic subunit	||||PRKAG3||Protein kinase, AMP-activated, gamma 3 non-catalytic subunit||		RefSeq	2	2	2q35	2q35	-	219512610	219522017	AMP-activated protein kinase activity	fatty acid biosynthesis
PRKAR1A	1.126	0.015	1.044	0.013	0.927	-1.2071	5573	NM_002734	Hs.280342	Protein kinase, cAMP-dependent, regulatory, type I, alpha (tissue specific extinguisher 1)	||PRKAR1A||TISSUE-SPECIFIC EXTINGUISHER 1||ADRENOCORTICAL TUMOR, SOMATIC||TSE1 PTC2 CHIMERIC ONCOGENE||protein kinase, cAMP-dependent, regulatory, type I, alpha (tissue specific extinguisher 1)||	5573	RefSeq	17	17	17q24.2	17q23-q24	+	64020137	64040503	3',5'-cAMP binding	intracellular signaling cascade	cAMP-dependent protein kinase complex
PRKAR2A	0.983	0.035	1.007	0.012	1.024	-0.322061	5576	NM_004157	Hs.517841	Protein kinase, cAMP-dependent, regulatory, type II, alpha	||PRKAR2A||PROTEIN KINASE A, RII-ALPHA SUBUNIT||PROTEIN KINASE, cAMP-DEPENDENT, REGULATORY, TYPE II, ALPHA||	5576	RefSeq	3	3	3p21.31	3p21.3-p21.2	-	48763096	48860274	3',5'-cAMP binding	intracellular signaling cascade	cAMP-dependent protein kinase complex
PRKAR2B	0.996	0.021	0.948	0.001	0.951	-0.988119	5577	NM_002736	Hs.433068	Protein kinase, cAMP-dependent, regulatory, type II, beta	||PRKAR2B||RII-BETA||PROTEIN KINASE, cAMP-DEPENDENT, REGULATORY, TYPE II, BETA||	5577	RefSeq	7	7	7q22.3	7q22	+	106279128	106396206	3',5'-cAMP binding	intracellular signaling cascade	cAMP-dependent protein kinase complex
PRKCA	0.974	0.024	0.99	0.023	1.016	-0.395054	5578	NM_002737	Hs.531704	Protein kinase C, alpha	||PRKCA||PKCA||protein kinase C, alpha||	5578	RefSeq	17	17	17q24.2	17q22-q23.2	+	61729387	62237324	ATP binding	cell surface receptor linked signal transduction	membrane fraction
PRKCABP	0.949	0.066	0.967	0.015	1.018	-0.376806	9463	NM_012407	Hs.180871	Protein kinase C, alpha binding protein	||PICK1||PRKCABP||PRKCA-BINDING PROTEIN||PROTEIN KINASE C-ALPHA-BINDING PROTEIN||PROTEIN INTERACTING WITH C KINASE 1||protein kinase C, alpha binding protein||	9463	RefSeq	22	22	22q13.1	22q13.1	+	36777902	36796207	ATPase activity	DNA methylation during embryonic development	Golgi apparatus
PRKCD	0.995	0.014	0.996	0.01	1.001	-0.531915	5580	NM_006254	Hs.155342	Protein kinase C, delta	||PRKCD||protein kinase C, delta||	5580	RefSeq	3	3	3p21.1	3p21.31	+	53170262	53201771	ATP binding	intracellular signaling cascade	cytoplasm
PRKCE	0.949	0.038	0.938	0.017	0.988	-0.650528	5581	NM_005400	Hs.97432	Protein kinase C, epsilon	||PKCE||PRKCE||protein kinase C, epsilon||	5581	RefSeq	2	2	2p21	2p21	+	45790693	46326779	ATP binding	induction of apoptosis	membrane fraction
PRKCG	1.078	0.038	1.06	0.02	0.983	-0.696148	5582	NM_002739	Hs.2890	Protein kinase C, gamma	||PRKCG||PKCC||PKCG||protein kinase C, gamma||	5582	RefSeq	19	19	19q13.42	19q13.4	+	59077278	59102713	ATP binding	intracellular signaling cascade
PRKCH	0.877	0.026	0.906	0.018	1.032	-0.249069	5583	NM_006255	Hs.333907	Protein kinase C, eta	||PRKCH||PRKCL||PKCL||protein kinase C, eta||	5583	RefSeq	14	14	14q23.1	14q22-q23	+	60858267	61087449	ATP binding	intracellular signaling cascade
PRKCI	1.196	0.024	0.956	0.028	0.798	-2.3841	5584	NM_002740	Hs.478199	Protein kinase C, iota	||PKC-LAMBDA/IOTA||PRKCI||PRKC-LAMBDA/IOTA||protein kinase C, iota||PROTEIN KINASE C, LAMBDA/IOTA||PROTEIN KINASE C, IOTA FORM||	5584	RefSeq	3	3	3q26.2	3q26.3	+	171422926	171506466	ATP binding	cytoskeleton organization and biogenesis	cytosol
PRKCL1	1.28	0.019	1.128	0.021	0.881	-1.6268	5585	NM_002741	Hs.466044	Protein kinase N1	||PRK1||PRKCL1||PKN1||protein kinase N1||PAK1, RAT, HOMOLOG OF||PROTEIN KINASE C-LIKE 1||SERINE/THREONINE PROTEIN KINASE N||PROTEIN KINASE C-RELATED KINASE 1||	5585	RefSeq	19	19	19p13.12	19p13.1-p12	+	14405165	14443678	ATP binding	activation of JNK	intracellular
PRKCL2	1.361	0.002	1.182	0.031	0.868	-1.74542	5586	NM_006256	Hs.440833	Protein kinase N2	||PRK2||PKN2||PRKCL2||protein kinase N2||PROTEIN KINASE C-LIKE 2||PROTEIN-KINASE C-RELATED KINASE 2||PAK2, RAT, HOMOLOG OF||	5586	RefSeq	1	1	1p22.2	1p22.2	+	88862276	89011443	ATP binding	protein amino acid phosphorylation	intracellular
PRKCM	1.012	0.016	1.013	0.01	1	-0.541039	5587	NM_002742	Hs.508999	Protein kinase D1	||PRKCM||PRKD1||PKC-MU||PKD||protein kinase D1||PROTEIN KINASE C, MU||	5587	RefSeq	14	14	14q12	14q11	-	29115439	29466652	ATP binding	cell proliferation	Golgi apparatus
PRKCN	1.063	0.008	1.085	0.019	1.021	-0.349434	23683	NM_005813	Hs.173536	Protein kinase D3	||PKC-NU||PRKCN||PRKD3||protein kinase D3||PROTEIN KINASE C, NU||	23683	RefSeq	2	2	2p22.2	2p21	-	37389298	37455873	ATP binding	intracellular signaling cascade
PRKCQ	0.935	0.025	0.955	0.011	1.02	-0.358558	5588	NM_006257	Hs.498570	Protein kinase C, theta	||PRKCQ||protein kinase C, theta||PROTEIN KINASE C, THETA FORM||	5588	RefSeq	10	10	10p15.1	10p15	-	6509110	6662244	ATP binding	intracellular signaling cascade	intracellular
PRKCSH	0.847	0.01	0.89	0	1.05	-0.0848357	5589	NM_002743	Hs.512640	Protein kinase C substrate 80K-H	||PRKCSH||G19P1 HEPATOCYSTIN||protein kinase C substrate 80K-H||PROTEIN KINASE C SUBSTRATE, 80-KD, HEAVY CHAIN||	5589	RefSeq	19	19	19p13.2	19p13.2	+	11407268	11422783	calcium ion binding	protein kinase cascade	endoplasmic reticulum
PRKCZ	1.049	0.016	1.098	0.006	1.046	-0.121332	5590	NM_002744	Hs.496255	Protein kinase C, zeta	||PKC2||PRKCZ||protein kinase C, zeta||PROTEIN KINASE C, ZETA FORM||	5590	RefSeq	1	1	1p36.33	1p36.33-p36.2	+	2014231	2148988	ATP binding	anti-apoptosis	cytoplasm
PRKD2	1.033	0.037	0.992	0.017	0.96	-0.906002	25865	NM_016457	Hs.466987	Protein kinase D2	||PKD2||PRKD2||protein kinase D2||	25865	RefSeq	19	19	19q13.32	19q13.3	-	51869412	51911506	ATP binding	intracellular signaling cascade	intracellular
PRKDC	1.265	0.024	1.161	0.008	0.917	-1.29834	5591	NM_006904	Hs.491682	Protein kinase, DNA-activated, catalytic polypeptide	||PRKDC||p350||DNA-PKcs||DNAPK||HYRC1||DNPK1||protein kinase, DNA-activated, catalytic polypeptide||DNA-DEPENDENT PROTEIN KINASE, CATALYTIC SUBUNIT||PROTEIN KINASE, DNA-ACTIVATED, CATALYTIC SUBUNIT||HYPERRADIOSENSITIVITY COMPLEMENTING 1, MOUSE, HOMOLOG OF||	5591	RefSeq	8	8	8q11.21	8q11	-	48848221	49035296	DNA binding	DNA recombination	nucleus
PRKG1	1.166	0.016	1.099	0.032	0.941	-1.07936	5592	NM_006258	Hs.2689	Protein kinase, cGMP-dependent, type I	||PRKG1||cGKI-BETA||cGKI-ALPHA||protein kinase, cGMP-dependent, type I||cGMP-DEPENDENT PROTEIN KINASE, TYPE I, BETA||PROTEIN KINASE, cGMP-DEPENDENT, REGULATORY, TYPE I||PRKGR1B cGMP-DEPENDENT PROTEIN KINASE, TYPE I, ALPHA||	5592	RefSeq	10	10	10q11.23	10q11.2	+	52504298	53725280	3',5'-cGMP binding	actin cytoskeleton organization and biogenesis	cAMP-dependent protein kinase complex
PRKG2	0.992	0.004	0.967	0.019	0.974	-0.778265	5593	NM_006259	Hs.546277	Protein kinase, cGMP-dependent, type II	||PRKG2||cGKII||PRKGR2||cGK, TYPE II||PROTEIN KINASE, cGMP-DEPENDENT, TYPE II||	5593	RefSeq	4	4	4q21.21	4q13.1-q21.1	-	82367015	82483394	3',5'-cGMP binding	protein amino acid phosphorylation
PRKR	1.097	0.026	1.041	0.014	0.948	-1.01549	5610	NM_002759	Hs.131431	Eukaryotic translation initiation factor 2-alpha kinase 2	||PRKR||EIF2AK2||PKR||PROTEIN KINASE, INTERFERON-INDUCIBLE DOUBLE-STRANDED RNA-ACTIVATED||Eukaryotic translation initiation factor 2-alpha kinase 2||	5610	RefSeq	2	2	2p22.2	2p22-p21	-	37245349	37295719	ATP binding	apoptosis	intracellular
PRKRA	1.043	0.003	1.054	0.006	1.01	-0.449798	8575	NM_003690	Hs.405537	Protein kinase, interferon-inducible double stranded RNA dependent activator	||PRKRA||PACT||RAX||PKR PROTEIN ACTIVATOR||PROTEIN ACTIVATOR OF INTERFERON-INDUCED PROTEIN KINASE||PROTEIN KINASE, INTERFERON-INDUCIBLE DOUBLE-STRANDED RNA-DEPENDENT ACTIVATOR||protein kinase, interferon-inducible double stranded RNA dependent activator||	8575	RefSeq	2	2	2q31.2	2q31.2	-	179121656	179141371	double-stranded RNA binding	immune response	intracellular
PRKWNK1	0.957	0.008	1.03	0.021	1.076	0.15239	65125	NM_018979	Hs.504432	WNK lysine deficient protein kinase 1	||PRKWNK1||WNK1||KDP||PROTEIN KINASE, LYSINE-DEFICIENT 1||WNK lysine deficient protein kinase 1||	65125	RefSeq	12	12	12p13.33	12p13.3	+	732992	888219	ATP binding	ion transport	cytoplasm
PRKWNK2	1.06	0.042	0.989	0.019	0.933	-1.15235	65268	NM_006648	Hs.522291	WNK lysine deficient protein kinase 2	||PRKWNK2||WNK2||PROTEIN KINASE, LYSINE-DEFICIENT 2||WNK lysine deficient protein kinase 2||	65268	RefSeq	9	9	9q22.31	9q22.3	+	93026766	93162409	ATP binding	protein amino acid phosphorylation
PRKWNK3	0.941	0.002	0.999	0.006	1.061	0.0155291	65267	NM_020922	Hs.92423	WNK lysine deficient protein kinase 3	||PRKWNK3||KIAA1566||WNK3||PROTEIN KINASE, LYSINE-DEFICIENT 3||WNK lysine deficient protein kinase 3||	65267	RefSeq	X	X	Xp11.22	Xp11.23-p11.21	-	54107777	54243127	ATP binding	protein amino acid phosphorylation
PRKWNK4	0.988	0.072	0.986	0.05	0.998	-0.559287	65266	NM_032387	Hs.105448	WNK lysine deficient protein kinase 4	||PRKWNK4||WNK4||PROTEIN KINASE, LYSINE-DEFICIENT 4||WNK lysine deficient protein kinase 4||	65266	RefSeq	17	17	17q21.2	17q21-q22	+	38186221	38202312	ATP binding	ion transport	tight junction
PRKX	0.992	0.059	1.045	0.019	1.053	-0.0574635	5613	NM_005044	Hs.390788	Protein kinase, X-linked	||PRKX||PROTEIN KINASE PKX1||protein kinase, X-linked||	5613	RefSeq	X	X	Xp22.33	Xp22.3	-	3515771	3625010	ATP binding	protein amino acid phosphorylation
PRKY	1.22	0.041	1.173	0.042	0.961	-0.896878	5616	NM_002760	Hs.546278	Protein kinase, Y-linked	||PRKY||protein kinase, Y-linked||	5616	RefSeq	Y	Y	Yp11.2	Yp11.2	+	7185374	7292950	ATP binding	protein amino acid phosphorylation
PRPF4B	1.199	0.028	1.151	0.009	0.959	-0.915126	8899	NM_003913	Hs.159014	PRP4 pre-mRNA processing factor 4 homolog B (yeast)	||PRPF4B||PRP4, YEAST, HOMOLOG OF||PRP4 pre-mRNA processing factor 4 homolog B (yeast)||PRECURSOR mRNA-PROCESSING FACTOR 4, S. POMBE, HOMOLOG OF, B||	8899	RefSeq	6	6	6p25.2	6p25.2	+	3966594	4010216	ATP binding	RNA splicing	nucleus
PRPS1	1.249	0.034	1.125	0.022	0.901	-1.44432	5631	NM_002764	Hs.56	Phosphoribosyl pyrophosphate synthetase 1	||PRPS1||PHOSPHORIBOSYLPYROPHOSPHATE SYNTHETASE I||PRPS1 GOUT, PRPS-RELATED||Phosphoribosyl pyrophosphate synthetase 1||	5631	RefSeq	X	X	Xq22.3	Xq21-q27	+	106677903	106700400	kinase activity	nucleoside metabolism
PRPS2	1.103	0.014	1.063	0.023	0.963	-0.87863	5634	NM_002765	Hs.104123	Phosphoribosyl pyrophosphate synthetase 2	||PRPS2||PHOSPHORIBOSYLPYROPHOSPHATE SYNTHETASE II||Phosphoribosyl pyrophosphate synthetase 2||	5634	RefSeq	X	X	Xp22.2	Xp22.3-p22.2	+	12569187	12601996	kinase activity	nucleoside metabolism
PRPSAP1	1.095	0.038	1.041	0.009	0.95	-0.997243	5635	NM_002766	Hs.77498	Phosphoribosyl pyrophosphate synthetase-associated protein 1	||PAP39||PRPSAP1||PHOSPHORIBOSYLPYROPHOSPHATE SYNTHETASE-ASSOCIATED PROTEIN 1||Phosphoribosyl pyrophosphate synthetase-associated protein 1||	5635	RefSeq	17	17	17q25.1	17q24-q25	-	71818609	71861526	enzyme inhibitor activity	nucleoside metabolism
PRPSAP2	1.105	0.021	1.11	0.025	1.004	-0.504543	5636	NM_002767	Hs.462418	Phosphoribosyl pyrophosphate synthetase-associated protein 2	||PAP41||PRPSAP2||PHOSPHORIBOSYLPYROPHOSPHATE SYNTHETASE-ASSOCIATED PROTEIN 2||Phosphoribosyl pyrophosphate synthetase-associated protein 2||	5636	RefSeq	17	17	17p11.2	17p11.2-p12	+	18702216	18775305	enzyme inhibitor activity	nucleoside metabolism
TAO1	0.906	0.036	1.002	0.013	1.105	0.416988	9344	NM_004783	Hs.291623	TAO kinase 2	||TAOK2||TAO kinase 2||	9344	RefSeq	16	16	16p11.2	16p11.2	+	29892722	29911082	ATP binding	actin cytoskeleton organization and biogenesis	cytoplasmic membrane-bound vesicle
PSKH1	0.903	0.032	0.927	0.003	1.026	-0.303813	5681	NM_006742	Hs.513683	Protein serine kinase H1	||PSKH1||protein serine kinase H1||	5681	RefSeq	16	16	16q22.1	16q22.1	+	66484715	66521081	ATP binding	protein amino acid phosphorylation	Golgi apparatus
PSKH2	0.842	0.034	0.966	0.021	1.148	0.809323	85481	NM_033126	Hs.532044	Protein serine kinase H2	||PSKH2||protein serine kinase H2||	85481	RefSeq	8	8	8q21.3	8q21.3	-	87129806	87150967	ATP binding	protein amino acid phosphorylation
PTK2	1.132	0.071	1.141	0.005	1.007	-0.477171	5747	NM_005607	Hs.395482	PTK2 protein tyrosine kinase 2	||FAK1||PTK2||PROTEIN-TYROSINE KINASE, CYTOPLASMIC||FOCAL ADHESION KINASE 1||PTK2 protein tyrosine kinase 2||	5747	RefSeq	8	8	8q24.3	8q24-qter	-	141737682	142080514	ATP binding	integrin-mediated signaling pathway	cytoskeleton
PTK2B	1.397	0.029	1.255	0.015	0.898	-1.47169	2185	NM_004103	Hs.491322	PTK2B protein tyrosine kinase 2 beta	||CADTK||2.7.1.112||PYK2||FADK2||FAK2||PTK2B||RAFTK||PKB||CAKB||CAK beta||calcium-dependent tyrosine kinase||protein kinase B||PROTEIN-TYROSINE KINASE 2, BETA||focal adhesion kinase 2||CELL ADHESION KINASE, BETA||proline-rich tyrosine kinase 2||cell adhesion kinase beta||related adhesion focal tyrosine kinase||PTK2B protein tyrosine kinase 2 beta||PTK2B protein tyrosine kinase 2 beta isoform a||P…	2185	RefSeq	8	8	8p21.2	8p21.1	+	27224915	27372820	ATP binding	apoptosis	cytoplasm
PTK6	1.284	0.051	1.119	0.029	0.871	-1.71804	5753	NM_005975	Hs.51133	PTK6 protein tyrosine kinase 6	||PTK6||PROTEIN-TYROSINE KINASE 6||BREAST TUMOR KINASE||PROTEIN-TYROSINE KINASE BRK||PTK6 protein tyrosine kinase 6||	5753	RefSeq	20	20	20q13.33	20q13.3	-	61630221	61639151	ATP binding	intracellular signaling cascade	nucleus
PTK7	1.085	0.059	1.031	0.003	0.95	-0.997243	5754	NM_002821	Hs.90572	PTK7 protein tyrosine kinase 7	||PTK7||PROTEIN-TYROSINE KINASE PTK7||COLON CARCINOMA KINASE-4||PTK7 protein tyrosine kinase 7||	5754	RefSeq	6	6	6p21.1	6p21.1-p12.2	+	43152006	43237435	ATP binding	cell adhesion	integral to membrane
PTK9	0.904	0.165	0.935	0.01	1.033	-0.239945	5756	NM_002822	Hs.189075	PTK9 protein tyrosine kinase 9	||PTK9||PTK9 protein tyrosine kinase 9||	5756	RefSeq	12	12	12q12	12q12	-	42473794	42486445
PTK9L	1.176	0.044	1.019	0.08	0.866	-1.76366	11344	NM_007284	Hs.436439	PTK9L protein tyrosine kinase 9-like (A6-related protein)	||PTK9L||A6RP||PTK9L protein tyrosine kinase 9-like (A6-related protein)||	11344	RefSeq	3	3	3p21.2	3p21.1	-	52237666	52248223	ATP binding		intracellular
PTPN5	1.05	0	1.051	0.031	1.001	-0.531915	84867	NM_032781	Hs.79092	Protein tyrosine phosphatase, non-receptor type 5 (striatum-enriched)	||STEP||PTPN5||PTPN, STRIATUM-ENRICHED||PROTEIN-TYROSINE PHOSPHATASE, NONRECEPTOR-TYPE, 5||Protein tyrosine phosphatase, non-receptor type 5 (striatum-enriched)||	84867	RefSeq	11	11	11p15.1	11p15.1	-	18706052	18769874	hydrolase activity	protein amino acid dephosphorylation	integral to membrane
PTPRG	1.087	0.019	1.076	0.017	0.989	-0.641404	5793	NM_002841	Hs.386866	Protein tyrosine phosphatase, receptor type, G	||PTPRG||PTPG||PROTEIN-TYROSINE PHOSPHATASE GAMMA||PROTEIN-TYROSINE PHOSPHATASE, RECEPTOR-TYPE, GAMMA||protein tyrosine phosphatase, receptor type, G||	5793	RefSeq	3	3	3p14.2	3p21-p14	+	61522284	62254737	carbonate dehydratase activity	one-carbon compound metabolism	integral to plasma membrane
PTPRJ	1.012	0.003	1.028	0.025	1.015	-0.404178	5795	NM_002843	Hs.318547	Protein tyrosine phosphatase, receptor type, J	||PTPRJ||DEP1||SCC1||PROTEIN-TYROSINE PHOSPHATASE, ETA||PROTEIN-TYROSINE PHOSPHATASE, RECEPTOR-TYPE, J||protein tyrosine phosphatase, receptor type, J||SUSCEPTIBILITY TO COLON CANCER 1, MOUSE, HOMOLOG OF||	5795	RefSeq	11	11	11p11.2	11p11.2	+	47958688	48146246	hydrolase activity	cell-cell signaling	integral to plasma membrane
PTPRR	0.936	0.066	1.003	0.018	1.07	0.0976457	5801	NM_002849	Hs.506076	Protein tyrosine phosphatase, receptor type, R	||PCPTP1||PTPRR||PTPRQ, FORMERLY||PC12 PROTEIN-TYROSINE PHOSPHATASE||PROTEIN-TYROSINE PHOSPHATASE, RECEPTOR-TYPE, R||PROTEIN-TYROSINE PHOSPHATASE, RECEPTOR-TYPE, Q, FORMERLY||protein tyrosine phosphatase, receptor type, R||	5801	RefSeq	12	12	12q15	12q15	-	69318128	69600851	hydrolase activity	embryonic development (sensu Mammalia)	integral to membrane
PTPRT	0.821	0.014	0.819	0.025	0.997	-0.568411	11122	NM_007050	Hs.549109	Protein tyrosine phosphatase, receptor type, T	||PTPRT||RPTP-RHO||KIAA0283||PROTEIN-TYROSINE PHOSPHATASE, RECEPTOR-TYPE, T||protein tyrosine phosphatase, receptor type, T||	11122	RefSeq	20	20	20q12	20q12-q13	-	40134806	41251971	hydrolase activity	protein amino acid dephosphorylation	integral to plasma membrane
PXK	1.15	0.046	1.102	0.018	0.958	-0.92425	54899	NM_017771	Hs.190544	PX domain containing serine/threonine kinase	||PXK||PX domain containing serine/threonine kinase||	54899	RefSeq	3	3	3p14.3	3p14.3	+	58293656	58385918	ATP binding	intracellular signaling cascade
PYCS	1.088	0.009	1.051	0.023	0.965	-0.860382	5832	NM_002860	Hs.500645	Aldehyde dehydrogenase 18 family, member A1	||P5CS||PYCS||ALDH18A1||1-@PYRROLINE-5-CARBOXYLATE SYNTHETASE||GLUTAMATE GAMMA-SEMIALDEHYDE SYNTHETASE||aldehyde dehydrogenase 18 family, member A1||GSAS HYPERAMMONEMIA WITH HYPOORNITHINEMIA, HYPOCITRULLINEMIA, HYPOARGININEMIA, AND HYPOPROLINEMIA||	5832	RefSeq	10	10	10q24.1	10q24.3	-	97355691	97406372	N-acetyl-gamma-glutamyl-phosphate reductase activity	amino acid biosynthesis	inner membrane
RAC1	1.077	0.047	1.033	0.004	0.959	-0.915126	5879	NM_018890	Hs.413812	Ras-related C3 botulinum toxin substrate 1 (rho family, small GTP binding protein Rac1)	||RAC1||RHO FAMILY, SMALL GTP-BINDING PROTEIN RAC1||ras-related C3 botulinum toxin substrate 1 (rho family, small GTP binding protein Rac1)||	5879	RefSeq	7	7	7p22.1	7p22	+	6187365	6216837	GTP binding	protein transport
RAF1	1.04	0.036	0.899	0.015	0.864	-1.78191	5894	NM_002880	Hs.159130	V-raf-1 murine leukemia viral oncogene homolog 1	||RAF1||ONCOGENE RAF1||ONCOGENE MIL||CRAF PAROTID GLAND TUMORS||TRANSFORMING REPLICATION-DEFECTIVE MURINE RETROVIRUS 3611-MSV||V-raf-1 murine leukemia viral oncogene homolog 1||	5894	RefSeq	3	3	3p25.2	3p25	-	12600107	12680414	ATP binding	apoptosis	mitochondrial outer membrane
RAGE	0.977	0.009	1.06	0.019	1.085	0.234507	5891	NM_014226	Hs.104119	Renal tumor antigen	||MOK||RAGE||Renal tumor antigen||	5891	RefSeq	14	14	14q32.32	14q32	-	101764930	101841284	ATP binding	protein amino acid phosphorylation	cytoplasm
RASGRF2	0.87	0.002	0.961	0.028	1.104	0.407864	5924	NM_006909	Hs.162129	Ras protein-specific guanine nucleotide-releasing factor 2	||RASGRF2||Ras protein-specific guanine nucleotide-releasing factor 2||	5924	RefSeq	5	5	5q14.1	5q13	+	80292313	80557709	guanyl-nucleotide exchange factor activity	small GTPase mediated signal transduction
PDXK	0.99	0.014	1.037	0	1.047	-0.112208	8566	NM_003681	Hs.284491	Pyridoxal (pyridoxine, vitamin B6) kinase	||||PDXK||Pyridoxal (pyridoxine, vitamin B6) kinase||		RefSeq	21	21	21q22.3	21q22.3	+	43963405	44006608	ATP binding
PRKCB1	0.799	0.028	0.865	0.019	1.082	0.207135	5579	NM_002738	Hs.460355	Protein kinase C, beta 1	||PRKCB1||PKCB||PRKCB PRKCB2||PROTEIN KINASE C, BETA-1||protein kinase C, beta 1||	5579	RefSeq	16	16	16p12.1	16p11.2	+	23754822	24134824	ATP binding	intracellular signaling cascade	cytoplasm
RBKS	0.993	0.023	0.962	0.012	0.968	-0.833009	64080	NM_022128	Hs.11916	Ribokinase	||RBKS||Ribokinase||	64080	RefSeq	2	2	2p23.2	2p23.3	-	27915916	28024874	kinase activity	D-ribose metabolism
RET	1.135	0.044	1.051	0.008	0.925	-1.22534	5979	NM_000323					RefSeq	10		10q11.21		+	42892517	42945799
RFP	1.086	0.008	1.006	0.019	0.926	-1.21622	5987	NM_006510	Hs.440382	Ret finger protein	||RFP||TRIM27||Ret finger protein||TRIPARTITE MOTIF-CONTAINING PROTEIN 27||	5987	RefSeq	6	6	6p22.1	6p22	-	28978758	28999744	DNA binding	cell proliferation	integral to plasma membrane
GRK1	1.094	0.016	0.92	0.005	0.84	-2.00089	6011	NM_002929	Hs.103501	G protein-coupled receptor kinase 1	||GRK1||RHOK||RHODOPSIN KINASE||G PROTEIN-DEPENDENT RECEPTOR KINASE 1||G protein-coupled receptor kinase 1||	6011	RefSeq	13	13	13q34	13q34	+	113369597	113373973	ATP binding	changes in polarization state of photoreceptor cell membrane	cytoplasm
RIOK1	1.23	0.035	1.071	0.011	0.87	-1.72717	83732	NM_031480	Hs.437474	RIO kinase 1 (yeast)	||RIOK1||RIO kinase 1 (yeast)||	83732	RefSeq	6	6	6p24.3	6p24.3	+	7335060	7363267	ATP binding
RIOK3	1.205	0.008	0.995	0.013	0.825	-2.13775	8780	NM_003831	Hs.445511	RIO kinase 3 (yeast)	||RIOK3||RIO kinase 3 (yeast)||SUDD, ASPERGILLUS NIDULANS, HOMOLOG OF||	8780	RefSeq	18	18	18q11.2	18q11.2	+	19287253	19317031	ATP binding	chromosome segregation
RIPK1	0.983	0.03	0.942	0.026	0.957	-0.933374	8737	NM_003804	Hs.519842	Receptor (TNFRSF)-interacting serine-threonine kinase 1	||RIP1||RIPK1||RECEPTOR-INTERACTING PROTEIN||RECEPTOR-INTERACTING SERINE/THREONINE KINASE 1||receptor (TNFRSF)-interacting serine-threonine kinase 1||	8737	RefSeq	6	6	6p25.2	6p25.2	+	3022056	3059173	ATP binding	apoptosis
RIPK2	0.993	0.005	0.911	0.021	0.917	-1.29834	8767	NM_003821	Hs.103755	Receptor-interacting serine-threonine kinase 2	||RICK||CARDIAK||RIPK2||RIP2||CARD-CONTAINING ICE-ASSOCIATED KINASE||RECEPTOR-INTERACTING PROTEIN 2||Receptor-interacting serine-threonine kinase 2||RIP-LIKE INTERACTING CLARP KINASE||RECEPTOR-INTERACTING SERINE/THREONINE KINASE 2||	8767	RefSeq	8	8	8q21.3	8q21	+	90839172	90872432	ATP binding	inflammatory response	intracellular
RIPK3	0.905	0.018	0.85	0.025	0.939	-1.09761	11035	NM_006871	Hs.268551	Receptor-interacting serine-threonine kinase 3	||RIP3||RIPK3||RECEPTOR-INTERACTING PROTEIN 3||RECEPTOR-INTERACTING SERINE/THREONINE KINASE 3||Receptor-interacting serine-threonine kinase 3||	11035	RefSeq	14	14	14q11.2	14q11.2	-	23875071	23879013	ATP binding	protein amino acid phosphorylation
RNASEL	0.605	0.011	0.801	0.012	1.322	2.39691	6041	NM_021133	Hs.518545	Ribonuclease L (2',5'-oligoisoadenylate synthetase-dependent)	||RNASEL||RNS4||RIBONUCLEASE 4||INTERFERON-INDUCED 2-5A-DEPENDENT RNase||RIBONUCLEASE, 2-5A-DEPENDENT, INTERFERON-INDUCED||ribonuclease L (2',5'-oligoisoadenylate synthetase-dependent)||	6041	RefSeq	1	1	1q25.3	1q25	-	179274428	179287765	ATP binding	mRNA processing	cellular component unknown
ROCK1	0.982	0.002	0.944	0.008	0.96	-0.906002	6093	NM_005406	Hs.306307	Rho-associated, coiled-coil containing protein kinase 1	||p160-ROCK||ROCK1||RHO KINASE||RHO-ASSOCIATED COILED-COIL-CONTAINING PROTEIN KINASE 1||Rho-associated, coiled-coil containing protein kinase 1||	6093	RefSeq	18	18	18q11.1	18q11.1	-	16787532	16944869	ATP binding	Rho protein signal transduction	cytoskeleton
ROCK2	0.901	0.013	0.88	0.028	0.976	-0.760017	9475	NM_004850	Hs.58617	Rho-associated, coiled-coil containing protein kinase 2	||ROCK2||RHO-ASSOCIATED COILED-COIL-CONTAINING PROTEIN KINASE 2||Rho-associated, coiled-coil containing protein kinase 2||	9475	RefSeq	2	2	2p25.1	2p24	-	11272375	11435309	ATP binding	cytokinesis	actin cytoskeleton
ROR1	0.957	0.004	0.913	0.007	0.954	-0.960746	4919	NM_005012	Hs.436456	Receptor tyrosine kinase-like orphan receptor 1	||NTRKR1||ROR1||NEUROTROPHIC TYROSINE KINASE, RECEPTOR-RELATED 1||Receptor tyrosine kinase-like orphan receptor 1||	4919	RefSeq	1	1	1p31.3	1p32-p31	+	63951734	64356728	ATP binding	development	cytoplasm
ROR2	1.236	0.037	1.102	0.018	0.891	-1.53556	4920	NM_004560	Hs.98255	Receptor tyrosine kinase-like orphan receptor 2	||NTRKR2||ROR2||NEUROTROPHIC TYROSINE KINASE, RECEPTOR-RELATED 2||Receptor tyrosine kinase-like orphan receptor 2||	4920	RefSeq	9	9	9q22.31	9q22	-	91564438	91791999	ATP binding	development	integral to plasma membrane
ROS1	1.097	0.02	0.968	0.03	0.882	-1.61768	6098	NM_002944	Hs.1041	V-ros UR2 sarcoma virus oncogene homolog 1 (avian)	||ROS1||ONCOGENE ROS||MCF3 ROS1/FIG FUSION GENE||v-ros UR2 sarcoma virus oncogene homolog 1 (avian)||V-ROS AVIAN UR2 SARCOMA VIRUS ONCOGENE HOMOLOG 1||	6098	RefSeq	6	6	6q22.1	6q22	-	117716222	117853711	ATP binding	protein amino acid phosphorylation	integral to membrane
RP2	1.203	0.003	1.019	0.03	0.847	-1.93702	6102	NM_006915	Hs.44766	Retinitis pigmentosa 2 (X-linked recessive)	||RP2||RP2 RP2 GENE||RETINITIS PIGMENTOSA 2, X-LINKED||retinitis pigmentosa 2 (X-linked recessive)||	6102	RefSeq	X	X	Xp11.3	Xp11.4-p11.21	+	46452628	46498043	unfolded protein binding	beta-tubulin folding	membrane
RPS6KA1	1.117	0.029	1.022	0.004	0.914	-1.32571	6195	NM_002953	Hs.149957	Ribosomal protein S6 kinase, 90kDa, polypeptide 1	||RSK1||RPS6KA1||RIBOSOMAL S6 KINASE 1||RIBOSOMAL PROTEIN S6 KINASE, 90-KD, 1||ribosomal protein S6 kinase, 90kDa, polypeptide 1||	6195	RefSeq	1	1	1p36.11	1p	+	26540406	26585656	ATP binding	protein amino acid phosphorylation
RPS6KA2	1.088	0.002	0.934	0.034	0.858	-1.83666	6196	NM_021135	Hs.147119	Ribosomal protein S6 kinase, 90kDa, polypeptide 2	||RSK3||RPS6KA2||RIBOSOMAL S6 KINASE 3||RIBOSOMAL PROTEIN S6 KINASE, 90-KD, 2||ribosomal protein S6 kinase, 90kDa, polypeptide 2||	6196	RefSeq	6	6	6q27	6q27	-	166795129	167011136	ATP binding	protein amino acid phosphorylation	nucleus
RPS6KA3	1.057	0.038	0.964	0.015	0.912	-1.34396	6197	NM_004586	Hs.445387	Ribosomal protein S6 kinase, 90kDa, polypeptide 3	||RSK2||RPS6KA3||RIBOSOMAL S6 KINASE 2||RIBOSOMAL PROTEIN S6 KINASE, 90-KD, 3||ribosomal protein S6 kinase, 90kDa, polypeptide 3||	6197	RefSeq	X	X	Xp22.12	Xp22.2-p22.1	-	19933136	20044407	ATP binding	central nervous system development
RPS6KA4	0.929	0.042	0.878	0.005	0.944	-1.05199	8986	NM_003942	Hs.105584	Ribosomal protein S6 kinase, 90kDa, polypeptide 4	||RSKB||RPS6KA4||MSK2||RIBOSOMAL S6 KINASE B||MITOGEN- AND STRESS-ACTIVATED PROTEIN KINASE 2||RIBOSOMAL PROTEIN S6 KINASE, 90-KD, 4||ribosomal protein S6 kinase, 90kDa, polypeptide 4||	8986	RefSeq	11	11	11q13.1	11q11-q13	+	63883218	63896262	ATP binding	protein amino acid phosphorylation	nucleus
RPS6KA5	1.023	0.022	1.026	0.015	1.003	-0.513667	9252	NM_004755	Hs.510225	Ribosomal protein S6 kinase, 90kDa, polypeptide 5	||MSK1||RPS6KA5||MITOGEN- AND STRESS-ACTIVATED PROTEIN KINASE 1||RIBOSOMAL PROTEIN S6 KINASE, 90-KD, 5||ribosomal protein S6 kinase, 90kDa, polypeptide 5||	9252	RefSeq	14	14	14q32.12	14q31-q32.1	-	90406924	90596746	ATP binding	DNA damage induced protein phosphorylation	nucleus
RPS6KA6	1.027	0.012	1.009	0.053	0.982	-0.705272	27330	NM_014496	Hs.368153	Ribosomal protein S6 kinase, 90kDa, polypeptide 6	||RSK4||RPS6KA6||RIBOSOMAL S6 KINASE 4||RIBOSOMAL PROTEIN S6 KINASE, 90-KD, 6||ribosomal protein S6 kinase, 90kDa, polypeptide 6||	27330	RefSeq	X	X	Xq21.1	Xq21	-	83125128	83254098	ATP binding	central nervous system development
RPS6KB1	1.103	0.017	1.131	0.036	1.024	-0.322061	6198	NM_003161	Hs.463642	Ribosomal protein S6 kinase, 70kDa, polypeptide 1	||p70(S6K)-ALPHA||p70-ALPHA||RPS6KB1||S6K1||p70 S6 KINASE, ALPHA||RIBOSOMAL PROTEIN S6 KINASE, 70-KD, 1||ribosomal protein S6 kinase, 70kDa, polypeptide 1||	6198	RefSeq	17	17	17q23.2	17q23.2	+	55325306	55379669	ATP binding	protein amino acid phosphorylation
RPS6KB2	0.974	0.002	0.99	0	1.016	-0.395054	6199	NM_003952	Hs.534345	Ribosomal protein S6 kinase, 70kDa, polypeptide 2	||p70(S6K)-BETA||S6K2||p70-BETA||RPS6KB2||p70 S6 KINASE, BETA||RIBOSOMAL PROTEIN S6 KINASE, 70-KD, 2||ribosomal protein S6 kinase, 70kDa, polypeptide 2||	6199	RefSeq	11	11	11q13.2	11q13.2	+	66952562	66959448	ATP binding	protein amino acid phosphorylation
RPS6KC1	1.036	0.026	1.015	0.044	0.978	-0.741769	26750	NM_012424	Hs.30352	Ribosomal protein S6 kinase, 52kDa, polypeptide 1	||RPS6KC1||ribosomal protein S6 kinase, 52kDa, polypeptide 1||	26750	RefSeq	1	1	1q32.3	1q41	+	209612991	209835202	ATP binding	protein amino acid phosphorylation
RPS6KL1	1.089	0.054	1.009	0.017	0.926	-1.21622	83694	NM_031464	Hs.414481	Ribosomal protein S6 kinase-like 1	||RPS6KL1||ribosomal protein S6 kinase-like 1||	83694	RefSeq	14	14	14q24.3	14q24.3	-	74442099	74458630	ATP binding	protein amino acid phosphorylation
RYK	0.93	0.025	0.977	0.019	1.05	-0.0848357	6259	NM_002958	Hs.245869	RYK receptor-like tyrosine kinase	||RYK||RYK1||RYK receptor-like tyrosine kinase||	6259	RefSeq	3	3	3q22.1	3q22	-	135358675	135452288	ATP binding	protein amino acid phosphorylation	integral to plasma membrane
SAST	1.061	0.012	1.009	0.006	0.95	-0.997243	22983	NM_014975	Hs.227489	Microtubule associated serine/threonine kinase 1	||MAST1||Microtubule associated serine/threonine kinase 1||	22983	RefSeq	19	19	19p13.13	19p13.2	+	12810347	12846765	ATP binding	cytoskeleton organization and biogenesis	cytoskeleton
SCAP1	1.007	0.027	0.983	0.013	0.975	-0.769141	8631	NM_003726	Hs.316931	Src family associated phosphoprotein 1	||SKAP55||SCAP1||SRC FAMILY-ASSOCIATED PHOSPHOPROTEIN 1||SRC KINASE-ASSOCIATED PHOSPHOPROTEIN, 55-KD||Src family associated phosphoprotein 1||	8631	RefSeq	17	17	17q21.32	17q21.32	-	43565803	43862551	SH3/SH2 adaptor activity	immune response
SCYL1	0.813	0.007	0.85	0.044	1.045	-0.130456	57410	NM_020680	Hs.238839	SCY1-like 1 (S. cerevisiae)	||SCYL1||NTKL||N-TERMINAL KINASE-LIKE||SCY1-like 1 (S. cerevisiae)||	57410	RefSeq	11	11	11q13.1	11q13	+	65049158	65062750	ATP binding	mitotic chromosome condensation	cellular component unknown
SEPHS1	1.096	0.012	1.009	0.011	0.92	-1.27096	22929	NM_012247	Hs.124027	Selenophosphate synthetase 1	||SEPHS1||SPS1||Selenophosphate synthetase 1||	22929	RefSeq	10	10	10p13	10p14	-	13400088	13430286	ATP binding	protein modification
SGK	1.05	0.027	1.081	0.005	1.03	-0.267317	6446	NM_005627	Hs.296323	Serum/glucocorticoid regulated kinase	||SGK||SGK1||SERUM/GLUCOCORTICOID-REGULATED KINASE||Serum/glucocorticoid regulated kinase||	6446	RefSeq	6	6	6q23.2	6q23	-	134532081	134537695	ATP binding	apoptosis	nucleus
SGK2	1.016	0.023	1.007	0.017	0.991	-0.623156	10110	NM_016276	Hs.472793	Serum/glucocorticoid regulated kinase 2	||SGK2||SERUM/GLUCOCORTICOID-REGULATED KINASE 2||Serum/glucocorticoid regulated kinase 2||	10110	RefSeq	20	20	20q13.12	20q13.2	+	41628150	41647686	ATP binding	protein amino acid phosphorylation	cellular component unknown
SGKL	0.999	0.027	0.97	0.001	0.97	-0.814761	23678	NM_013257	Hs.380877	Serum/glucocorticoid regulated kinase-like	||CISK||SGKL||SGK3||SERUM/GLUCOCORTICOID-REGULATED KINASE-LIKE PROTEIN||SERUM/GLUCOCORTICOID-REGULATED KINASE 3||CYTOKINE-INDEPENDENT SURVIVAL KINASE||Serum/glucocorticoid regulated kinase-like||	23678	RefSeq	8	8	8q13.1	8q12.3-8q13.1	+	67850015	67936809	ATP binding	intracellular signaling cascade
SHC1	1.067	0.016	0.994	0.003	0.931	-1.1706	6464	NM_003029	Hs.433795	SHC (Src homology 2 domain containing) transforming protein 1	||SHC1||p66||p52||SHCA p46||SHC TRANSFORMING PROTEIN||SHC (Src homology 2 domain containing) transforming protein 1||	6464	RefSeq	1	1	1q22	1q21	-	151747847	151759913	phospholipid binding	activation of MAPK	plasma membrane
SIK2	0.947	0.007	1.014	0.016	1.07	0.0976457	23235	NM_015191	Hs.552588	SNF1-like kinase 2	||SNF1LK2||KIAA0781||SIK2||SNF1-like kinase 2||SALT-INDUCIBLE SERINE/THREONINE KINASE 2||	23235	RefSeq	11	11	11q23.1	11q23.1	+	110978379	111102840	ATP binding	protein amino acid phosphorylation	cytoplasm
SLK	1.145	0.027	1.052	0.025	0.918	-1.28921	9748	NM_014720	Hs.500972	STE20-like kinase (yeast)	||SLK||STE20-like kinase (yeast)||	9748	RefSeq	10	10	10q25.1	10q25.1	+	105717459	105777332	ATP binding	nucleotide-excision repair
SMG1	0.98	0.011	0.92	0.025	0.938	-1.10673	23049	NM_014006					RefSeq	16		16p12.3		-	18726582	18795057
SNARK	0.956	0.028	0.968	0	1.012	-0.43155	81788	NM_030952	Hs.497512	Likely ortholog of rat SNF1/AMP-activated protein kinase	||SNARK||SNF1/AMPK-RELATED PROTEIN KINASE||likely ortholog of rat SNF1/AMP-activated protein kinase||	81788	RefSeq	1	1	1q32.1	1q32.1	-	202002848	202022540	ATP binding	protein amino acid phosphorylation
SNF1LK	0.988	0.038	1.009	0.035	1.02	-0.358558	150094	NM_173354	Hs.282113	SNF1-like kinase	||SNF1LK||SNF1-like kinase||MSK, MOUSE, HOMOLOG OF||	150094	RefSeq	21	21	21q22.3	21q22.3	-	43658826	43671436	ATP binding	cell cycle	cytoplasm
PLK2	0.962	0.015	0.952	0.028	0.989	-0.641404	10769	NM_006622	Hs.398157	Polo-like kinase 2 (Drosophila)	||SNK||PLK2||SERUM-INDUCIBLE KINASE||polo-like kinase 2 (Drosophila)||	10769	RefSeq	5	5	5q11.2	5q12.1-q13.2	-	57785569	57791844	ATP binding	positive regulation of I-kappaB kinase/NF-kappaB cascade
SNRK	1.059	0.014	1.006	0	0.949	-1.00637	54861	NM_017719	Hs.476052	SNF related kinase	||SNRK||SNF related kinase||	54861	RefSeq	3	3	3p22.1	3p22.1	+	43303099	43367634	ATP binding	protein amino acid phosphorylation
SOCS1	1.087	0.018	1.066	0.017	0.98	-0.723521	8651	NM_003745	Hs.50640	Suppressor of cytokine signaling 1	||CIS1||SOCS1||JAB||TIP3||SSI1||CISH1||JAK-BINDING PROTEIN||TEC-INTERACTING PROTEIN 3||STAT-INDUCED STAT INHIBITOR 1||CYTOKINE-INDUCIBLE SH2 PROTEIN 1||Suppressor of cytokine signaling 1||	8651	RefSeq	16	16	16p13.13	16p13.13	-	11255774	11257540	insulin-like growth factor receptor binding	JAK-STAT cascade	cytoplasm
SOCS5	1.072	0.02	1.099	0.005	1.025	-0.312937	9655	NM_014011	Hs.468426	Suppressor of cytokine signaling 5	||SOCS5||CIS6||KIAA0671||CYTOKINE-INDUCIBLE SH2 PROTEIN 6||Suppressor of cytokine signaling 5||	9655	RefSeq	2	2	2p21	2p21	+	46837749	46901578	kinase inhibitor activity	JAK-STAT cascade	cytoplasm
SPA17	1.085	0.018	1.077	0.019	0.992	-0.614032	53340	NM_017425	Hs.286233	Sperm autoantigenic protein 17	||SPA17||SP17||Sperm autoantigenic protein 17||	53340	RefSeq	11	11	11q24.2	11q24.2	+	124048949	124069895	cAMP-dependent protein kinase regulator activity	fertilization (sensu Metazoa)	membrane
SPEC2	1.103	0.007	1.066	0	0.966	-0.851258	56990	NM_020240	Hs.549183	CDC42 small effector 2	||CDC42SE2||CDC42 small effector 2||	56990	RefSeq	5	5	5q23.3	5q23.3	+	130723085	130754683	kinase activity	signal transduction	plasma membrane
SPHK1	0.982	0.032	0.992	0.045	1.009	-0.458923	8877	NM_021972	Hs.68061	Sphingosine kinase 1	||SPHK1||Sphingosine kinase 1||	8877	RefSeq	17	17	17q25.1	17q25.2	+	71892296	71895536	D-erythro-sphingosine kinase activity	intracellular signaling cascade	cytosol
SPHK2	1.024	0.013	0.988	0.001	0.964	-0.869506	56848	NM_020126	Hs.528006	Sphingosine kinase 2	||SPHK2||Sphingosine kinase 2||	56848	RefSeq	19	19	19q13.33	19q13.2	+	53814359	53825473	ATP binding	anti-apoptosis	cytosol
SEPHS2	1.064	0.018	1.099	0.008	1.033	-0.239945	22928	NM_012248	Hs.118725	Selenophosphate synthetase 2	||SEPHS2||SPS2||Selenophosphate synthetase 2||	22928	RefSeq	16	16	16p11.2	16p11.2	-	30362453	30364725	ATP binding	selenocysteine biosynthesis	cellular component unknown
SQSTM1	0.892	0.005	0.945	0.004	1.059	-0.00271906	8878	NM_003900	Hs.529892	Sequestosome 1	||SQSTM1||Sequestosome 1||UBIQUITIN-BINDING PROTEIN P62||	8878	RefSeq	5	5	5q35.3	5q35	+	179180502	179197681	SH2 domain binding	endosome transport	cytosol
SRC	1.125	0.004	1.079	0.001	0.959	-0.915126	6714	NM_005417	Hs.195659	V-src sarcoma (Schmidt-Ruppin A-2) viral oncogene homolog (avian)	||ASV||SRC||SRC ONCOGENE||PROTOONCOGENE SRC||AVIAN SARCOMA VIRUS||V-SRC AVIAN SARCOMA (SCHMIDT-RUPPIN A-2) VIRAL ONCOGENE||v-src sarcoma (Schmidt-Ruppin A-2) viral oncogene homolog (avian)||	6714	RefSeq	20	20	20q11.23	20q12-q13	+	35406501	35467233	ATP binding	protein amino acid phosphorylation
SRMS	0.988	0.003	0.927	0.017	0.938	-1.10673	6725	NM_080823	Hs.411061	Src-related kinase lacking C-terminal regulatory tyrosine and N-terminal myristylation sites	||SRMS||src-related kinase lacking C-terminal regulatory tyrosine and N-terminal myristylation sites||	6725	RefSeq	20	20	20q13.33		-	61642606	61649301	ATP binding	intracellular signaling cascade
SRPK1	0.969	0.002	0.903	0.006	0.931	-1.1706	6732	NM_003137	Hs.443861	SFRS protein kinase 1	||SRPK1||SFRS protein kinase 1||PROTEIN KINASE, SERINE/ARGININE-SPECIFIC, 1||PROTEIN KINASE, ARGININE/SERINE-RICH SPLICING FACTOR, 1||	6732	RefSeq	6	6	6p21.31	6p21.3-p21.2	-	35908788	35996934	ATP binding	RNA splicing	nucleus
SRPK2	1.168	0.001	1.139	0.027	0.974	-0.778265	6733	NM_182691	Hs.285197	SFRS protein kinase 2	||SRPK2||SFRS protein kinase 2||PROTEIN KINASE, SERINE/ARGININE-SPECIFIC, 2||PROTEIN KINASE, ARGININE/SERINE-RICH SPLICING FACTOR, 2||	6733	RefSeq	7	7	7q22.3	7q22-q31.1	-	104350774	104503428	ATP binding	protein amino acid phosphorylation
ABI1	1.076	0.025	0.999	0.007	0.928	-1.19797	10006	NM_005470	Hs.508148	Abl-interactor 1	||SSH3BP1||ABI1||Abl-interactor 1||ABL INTERACTOR 1||E3B1 ABI1/MLL FUSION GENE||SPECTRIN SH3 DOMAIN-BINDING PROTEIN 1||	10006	RefSeq	10	10	10p12.1	10p11.2	-	27076750	27189870	cytoskeletal protein binding	negative regulation of cell proliferation	cytosol
SSTK	1.057	0.007	0.923	0.01	0.873	-1.6998	83983	NM_032037	Hs.532711	Testis-specific serine kinase 6	||TSSK6||SSTK||Testis-specific serine kinase 6||	83983	RefSeq	19	19	19p13.11	19p13.11	-	19484227	19487357	ATP binding	protein amino acid phosphorylation
STK10	1.033	0.005	1.047	0.014	1.013	-0.422426	6793	NM_005990	Hs.519756	Serine/threonine kinase 10	||STK10||LOK||Serine/threonine kinase 10||SERINE/THREONINE PROTEIN KINASE 10||	6793	RefSeq	5	5	5q35.1	5q35.1	-	171403229	171547865	ATP binding	protein amino acid phosphorylation
STK11	0.98	0.001	0.977	0.012	0.996	-0.577535	6794	NM_000455	Hs.515005	Serine/threonine kinase 11 (Peutz-Jeghers syndrome)	||STK11||LKB1||SERINE/THREONINE PROTEIN KINASE 11||serine/threonine kinase 11 (Peutz-Jeghers syndrome)||	6794	RefSeq	19	19	19p13.3	19p13.3	+	1157641	1179428	ATP binding	protein amino acid phosphorylation
STK16	0.944	0.007	0.948	0.009	1.003	-0.513667	8576	NM_003691	Hs.153003	Serine/threonine kinase 16	||TSF1||STK16||TGFB-STIMULATED FACTOR 1||Serine/threonine kinase 16||SERINE/THREONINE PROTEIN KINASE 16||PKL12, MOUSE, HOMOLOG OF||TRANSFORMING GROWTH FACTOR-BETA-STIMULATED FACTOR 1||	8576	RefSeq	2	2	2q35	2q34-q37	+	219936009	219939131	ATP binding	protein amino acid phosphorylation
STK17A	0.979	0.011	1.003	0.012	1.024	-0.322061	9263	NM_004760	Hs.268887	Serine/threonine kinase 17a (apoptosis-inducing)	||DRAK1||STK17A||SERINE/THREONINE PROTEIN KINASE 17A||Serine/threonine kinase 17a (apoptosis-inducing)||DAP KINASE-RELATED APOPTOSIS-INDUCING PROTEIN KINASE 1||	9263	RefSeq	7	7	7p13	7p12-p14	+	43395965	43438962	ATP binding	apoptosis	nucleus
STK17B	1.158	0.012	1.048	0	0.904	-1.41695	9262	NM_004226	Hs.88297	Serine/threonine kinase 17b (apoptosis-inducing)	||DRAK2||STK17B||SERINE/THREONINE PROTEIN KINASE 17B||Serine/threonine kinase 17b (apoptosis-inducing)||DAP KINASE-RELATED APOPTOSIS-INDUCING PROTEIN KINASE 2||	9262	RefSeq	2	2	2q32.3	2q32.3	-	196827364	196861781	ATP binding	apoptosis	nucleus
PLK4	1.01	0.003	1.021	0.003	1.011	-0.440674	10733	NM_014264	Hs.172052	Polo-like kinase 4 (Drosophila)	||STK18||PLK4||SAK, MOUSE, HOMOLOG OF||polo-like kinase 4 (Drosophila)||SERINE/THREONINE PROTEIN KINASE 18||	10733	RefSeq	4	4	4q28.1	4q27-q28	+	129159705	129177532	ATP binding	protein amino acid phosphorylation
STK19	1.028	0.012	1.017	0.009	0.988	-0.650528	8859	NM_004197	Hs.485102	Serine/threonine kinase 19	||HLA-RP1||STK19||Serine/threonine kinase 19||SERINE/THREONINE PROTEIN KINASE 19||	8859	RefSeq	6	6	6p21.32	6p21.3	+	32047624	32057202	ATP binding	protein amino acid phosphorylation	nucleus
STK22B	1.23	0.018	1.151	0.008	0.936	-1.12498	23617	NM_053006	Hs.505323	Testis-specific serine kinase 2	||||STK22B||Testis-specific serine kinase 2||		RefSeq	22	22	22q11.21	22q11.21	+	17493343	17494690	ATP binding	cell differentiation
STK22C	1.1	0.089	1.065	0.012	0.967	-0.842133	81629	NM_052841	Hs.512763	Testis-specific serine kinase 3	||STK22C||TSSK3||STK22D, MOUSE, HOMOLOG OF||Testis-specific serine kinase 3||SERINE/THREONINE PROTEIN KINASE 22C||	81629	RefSeq	1	1	1p35.1	1p35-p34	+	32497292	32498998	ATP binding	cell differentiation	intracellular
STK22D	1.092	0.006	0.998	0.002	0.914	-1.32571	83942	NM_032028	Hs.519507	Testis-specific serine kinase 1	||STK22D||TSSK1||Testis-specific serine kinase 1||	83942	RefSeq	5	5	5q22.2	5q22.2	-	112796573	112798565
STK23	1.21	0.062	1.141	0.047	0.942	-1.07024	26576	NM_014370					RefSeq	X		Xq28		+	152567364	152572031
STK24	1.161	0.004	1.061	0.015	0.913	-1.33483	8428	NM_003576	Hs.508514	Serine/threonine kinase 24 (STE20 homolog, yeast)	||STK24||MST3B||SERINE/THREONINE PROTEIN KINASE 24||serine/threonine kinase 24 (STE20 homolog, yeast)||MST3 MAMMALIAN STERILE 20-LIKE 3, ISOFORM B||	8428	RefSeq	13	13	13q32.2	13q31.2-q32.3	-	97902414	97972253	ATP binding	protein amino acid phosphorylation
STK25	1.157	0.016	1.083	0.006	0.935	-1.1341	10494	NM_006374	Hs.516807	Serine/threonine kinase 25 (STE20 homolog, yeast)	||YSK1||SOK1||STK25||YEAST SPS1/STE20-RELATED KINASE 1||SERINE/THREONINE PROTEIN KINASE 25||STERILE 20/OXIDANT STRESS-RESPONSE KINASE 1||serine/threonine kinase 25 (STE20 homolog, yeast)||	10494	RefSeq	2	2	2q37.3	2q37.3	-	242154422	242168024	ATP binding	protein amino acid phosphorylation
STK29	0.984	0.021	0.975	0.006	0.99	-0.63228	9024	NM_003957	Hs.170819	BR serine/threonine kinase 2	||STK29||BRSK2||PEN11B||BR serine/threonine kinase 2||SAD1, C. ELEGANS, HOMOLOG OF||	9024	RefSeq	11	11	11p15.5	11p15.5	+	1367704	1439902	ATP binding	protein amino acid phosphorylation
STK3	0.904	0.002	0.96	0.006	1.062	0.0246531	6788	NM_006281	Hs.492333	Serine/threonine kinase 3 (STE20 homolog, yeast)	||MST2||STK3||KRS1||SERINE/THREONINE PROTEIN KINASE 3||MAMMALIAN STERILE 20-LIKE 2||KINASE RESPONSIVE TO STRESS 1||serine/threonine kinase 3 (STE20 homolog, yeast)||	6788	RefSeq	8	8	8q22.2	8q22.2	-	99536042	99907085	ATP binding	apoptosis	cytoplasm
STK31	0.912	0.032	0.978	0.015	1.071	0.10677	56164	NM_031414	Hs.309767	Serine/threonine kinase 31	||STK31||Serine/threonine kinase 31||	56164	RefSeq	7	7	7p15.3	7p15.3	+	23523132	23645371	ATP binding	protein amino acid phosphorylation
STK33	1.101	0.007	1.055	0	0.957	-0.933374	65975	NM_030906	Hs.501833	Serine/threonine kinase 33	||STK33||Serine/threonine kinase 33||SERINE/THREONINE PROTEIN KINASE 33||	65975	RefSeq	11	11	11p15.4	11p15.3	-	8369993	8572079	ATP binding	protein amino acid phosphorylation
STK35	1.128	0.005	1.079	0.038	0.957	-0.933374	140901	NM_080836	Hs.100057	Serine/threonine kinase 35	||CLIK1||STK35||CLP36-INTERACTING KINASE||Serine/threonine kinase 35||	140901	RefSeq	20	20	20p13	20p13	+	2031518	2077196	ATP binding	protein amino acid phosphorylation
STK36	0.93	0.009	0.974	0.015	1.047	-0.112208	27148	NM_015690	Hs.471404	Serine/threonine kinase 36 (fused homolog, Drosophila)	||KIAA1278||STK36||FUSED, DROSOPHILA, HOMOLOG OF||SERINE/THREONINE PROTEIN KINASE 36||serine/threonine kinase 36 (fused homolog, Drosophila)||	27148	RefSeq	2	2	2q35	2q35	+	219362313	219392941	ATP binding	mitotic chromosome condensation	cellular component unknown
STK38	1.142	0.002	1.051	0.024	0.919	-1.28009	11329	NM_007271	Hs.409578	Serine/threonine kinase 38	||NDR||STK38||NUCLEAR DBF2-RELATED PROTEIN||Serine/threonine kinase 38||SERINE/THREONINE PROTEIN KINASE 38||	11329	RefSeq	6	6	6p21.31	6p21	-	36569647	36623225	ATP binding	protein amino acid phosphorylation	nucleus
STK38L	0.983	0.014	0.99	0.014	1.006	-0.486295	23012	NM_015000	Hs.184523	Serine/threonine kinase 38 like	||STK38L||Serine/threonine kinase 38 like||	23012	RefSeq	12	12	12p11.23	12p11.23	+	27288374	27369794	ATP binding	protein amino acid phosphorylation	actin cytoskeleton
STK39	0.975	0.02	0.939	0.019	0.963	-0.87863	27347	NM_013233	Hs.276271	Serine threonine kinase 39 (STE20/SPS1 homolog, yeast)	||SPAK||STK39||SERINE/THREONINE PROTEIN KINASE 39||STE20/SPS1-RELATED PROLINE- AND ALANINE-RICH KINASE||serine threonine kinase 39 (STE20/SPS1 homolog, yeast)||	27347	RefSeq	2	2	2q24.3	2q24.3	-	168636037	168929612	ATP binding	protein amino acid phosphorylation	cytoplasm
STK4	0.997	0.001	1.001	0.001	1.004	-0.504543	6789	NM_006282	Hs.472838	Serine/threonine kinase 4	||KRS2||MST1||STK4||Serine/threonine kinase 4||SERINE/THREONINE PROTEIN KINASE 4||MAMMALIAN STERILE 20-LIKE 1||KINASE RESPONSIVE TO STRESS 2||	6789	RefSeq	20	20	20q13.12	20q11.2-q13.2	+	43028533	43142005	ATP binding	apoptosis	integral to membrane
STK6	0.978	0.004	0.986	0.026	1.008	-0.468047	6790	NM_003600	Hs.250822	Serine/threonine kinase 6	||AIK||STK6||AURORA/IPL1-LIKE KINASE||Serine/threonine kinase 6||SERINE/THREONINE PROTEIN KINASE 6||	6790	RefSeq	20	20	20q13.31	20q13.2-q13.3	-	54377851	54400758	ATP binding	cell cycle	nucleus
SYK	1.168	0.029	0.973	0.002	0.833	-2.06476	6850	NM_003177	Hs.371720	Spleen tyrosine kinase	||SYK||Spleen tyrosine kinase||PROTEIN-TYROSINE KINASE SYK||	6850	RefSeq	9	9	9q22.2	9q22	+	90643624	90738036	ATP binding	cell proliferation
TAF1	0.959	0.021	0.962	0.019	1.003	-0.513667	6872	NM_004606	Hs.158560	TAF1 RNA polymerase II, TATA box binding protein (TBP)-associated factor, 250kDa	||TAF1||CCGS||TF2D||TFIID||TAF2A||CCG1||TAFII250||TATA-BINDING PROTEIN-CONTAINING COMPLEX||CELL CYCLE BLOCK, G1-TO-S||CELL CYCLE GENE 1||BA2R TRANSCRIPTION FACTOR IID||TATA BOX-BINDING PROTEIN-ASSOCIATED FACTOR 2A||CELL CYCLE, G1 PHASE DEFECT||TBP-ASSOCIATED FACTOR, RNA POLYMERASE II, 250-KD||TAF1 RNA POLYMERASE II, TATA BOX-BINDING PROTEIN-ASSOCIATED FACTOR, 250-KD||TAF1 RNA polymerase II, TATA …	6872	RefSeq	X	X	Xq13.1	Xq13.1	+	70369134	70467321	ATP binding	G1 phase of mitotic cell cycle	nucleus
TAF1L	0.969	0.032	0.936	0.005	0.966	-0.851258	138474	NM_153809	Hs.408923	TAF1-like RNA polymerase II, TATA box binding protein (TBP)-associated factor, 210kDa	||TAF1L||TAF1 RNA POLYMERASE II-LIKE||TATA BOX-BINDING PROTEIN-ASSOCIATED FACTOR 1-LIKE||TAF1-like RNA polymerase II, TATA box binding protein (TBP)-associated factor, 210kDa||	138474	RefSeq	9	9	9p21.1	9p21.1	-	32619451	32625667	DNA binding	G1 phase of mitotic cell cycle	nucleus
TAO1	1.09	0.052	0.964	0.01	0.884	-1.59943	9344	NM_004783	Hs.291623	TAO kinase 2	||TAOK2||TAO kinase 2||	9344	RefSeq	16	16	16p11.2	16p11.2	+	29892722	29911082	ATP binding	actin cytoskeleton organization and biogenesis	cytoplasmic membrane-bound vesicle
TBK1	1.09	0.043	0.92	0.012	0.843	-1.97352	29110	NM_013254	Hs.505874	TANK-binding kinase 1	||TBK1||NAK||NF-KAPPA-B-ACTIVATING KINASE||TANK-binding kinase 1||	29110	RefSeq	12	12	12q14.2	12q14.1	+	63132203	63182158	ATP binding	positive regulation of I-kappaB kinase/NF-kappaB cascade
TEC	0.979	0.003	0.94	0.027	0.96	-0.906002	7006	NM_003215	Hs.479670	Tec protein tyrosine kinase	||TEC||Tec protein tyrosine kinase||	7006	RefSeq	4	4	4p12	4p12	-	47978728	48112742	ATP binding	protein amino acid phosphorylation
TEK	0.962	0.027	0.899	0.009	0.935	-1.1341	7010	NM_000459	Hs.89640	TEK tyrosine kinase, endothelial (venous malformations, multiple cutaneous and mucosal)	||TIE2||TEK||PROTEIN RECEPTOR TYROSINE KINASE, EPITHELIAL-SPECIFIC, TIE-2||TEK tyrosine kinase, endothelial (venous malformations, multiple cutaneous and mucosal)||	7010	RefSeq	9	9	9p21.2	9p21	+	27099440	27220164	ATP binding	cell-cell signaling	integral to plasma membrane
TESK1	1.005	0.023	0.918	0.01	0.913	-1.33483	7016	NM_006285	Hs.79358	Testis-specific kinase 1	||TESK1||Testis-specific kinase 1||TESTIS-SPECIFIC PROTEIN KINASE 1||	7016	RefSeq	9	9	9p13.3	9p13	+	35595366	35600029	ATP binding	protein amino acid phosphorylation
TESK2	0.954	0.04	0.909	0	0.952	-0.978994	10420	NM_007170	Hs.525091	Testis-specific kinase 2	||TESK2||Testis-specific kinase 2||TESTIS-SPECIFIC PROTEIN KINASE 2||	10420	RefSeq	1	1	1p34.1	1p32	-	45478648	45625926	ATP binding	actin cytoskeleton organization and biogenesis	nucleus
TEX14	0.887	0.013	0.833	0	0.939	-1.09761	56155	NM_031272	Hs.390221	Testis expressed sequence 14	||TEX14||TESTIS-EXPRESSED GENE 14||Testis expressed sequence 14||	56155	RefSeq	17	17	17q23.2	17q23.2	-	53989037	54124415	ATP binding	protein amino acid phosphorylation
TGFBR1	0.92	0.07	0.903	0.005	0.981	-0.714396	7046	NM_004612	Hs.494622	Transforming growth factor, beta receptor I (activin A receptor type II-like kinase, 53kDa)	||ALK5||TGFBR1||ACTIVIN RECEPTOR-LIKE KINASE 5||TRANSFORMING GROWTH FACTOR-BETA RECEPTOR, TYPE I||transforming growth factor, beta receptor I (activin A receptor type II-like kinase, 53kDa)||	7046	RefSeq	9	9	9q22.33	9q22	+	98946966	98991862	ATP binding	protein amino acid phosphorylation	integral to plasma membrane
TGFBR2	0.98	0.008	0.973	0.008	0.992	-0.614032	7048	NM_003242	Hs.82028	Transforming growth factor, beta receptor II (70/80kDa)	||HNPCC6||TGFBR2||COLON CANCER, HEREDITARY NONPOLYPOSIS, TYPE 6||TRANSFORMING GROWTH FACTOR-BETA RECEPTOR, TYPE II||TGFBR2 COLORECTAL CANCER, HEREDITARY NONPOLYPOSIS, TYPE 6||transforming growth factor, beta receptor II (70/80kDa)||	7048	RefSeq	3	3	3p24.1	3p22	+	30623041	30708147	ATP binding	positive regulation of cell proliferation	integral to membrane
TIE	1.101	0.062	1	0.006	0.908	-1.38045	7075	NM_005424	Hs.78824	Tyrosine kinase with immunoglobulin-like and EGF-like domains 1	||TIE1||PROTEIN RECEPTOR TYROSINE KINASE TIE 1||tyrosine kinase with immunoglobulin-like and EGF-like domains 1||TYROSINE KINASE WITH IMMUNOGLOBULIN AND EGF FACTOR HOMOLOGY DOMAINS||	7075	RefSeq	1	1	1p34.2	1p34-p33	+	43435756	43457871	ATP binding	mesoderm development	integral to plasma membrane
TJP2	0.99	0.024	0.936	0.008	0.945	-1.04286	9414	NM_004817	Hs.50382	Tight junction protein 2 (zona occludens 2)	||ZO2||TJP2||Tight junction protein 2 (zona occludens 2)||	9414	RefSeq	9	9	9q21.11	9q13-q21	+	69018642	69099672	guanylate kinase activity		integral to plasma membrane
TK1	1.179	0.028	0.978	0.006	0.829	-2.10125	7083	NM_003258	Hs.515122	Thymidine kinase 1, soluble	||TK1||THYMIDINE KINASE, SOLUBLE||Thymidine kinase 1, soluble||	7083	RefSeq	17	17	17q25.3	17q23.2-q25.3	-	73681775	73694726	ATP binding	DNA metabolism	cytoplasm
TK2	1.142	0.013	1.017	0.016	0.89	-1.54469	7084	NM_004614	Hs.512619	Thymidine kinase 2, mitochondrial	||TK2||THYMIDINE KINASE, MITOCHONDRIAL||Thymidine kinase 2, mitochondrial||	7084	RefSeq	16	16	16q22.1	16q22-q23.1	-	65102150	65141816	ATP binding	DNA metabolism	mitochondrion
TLK1	0.95	0.049	0.873	0.003	0.918	-1.28921	9874	NM_012290	Hs.470586	Tousled-like kinase 1	||PKU-BETA||KIAA0137||TLK1||PROTEIN KINASE, UBIQUITOUS-BETA||Tousled-like kinase 1||	9874	RefSeq	2	2	2q31.1	2q31.1	-	171674076	171842467	ATP binding	cell cycle	nucleus
TLK2	1.063	0.011	0.921	0	0.865	-1.77279	11011	NM_006852	Hs.445078	Tousled-like kinase 2	||PKU-ALPHA||TLK2||Tousled-like kinase 2||PROTEIN KINASE, UBIQUITOUS-ALPHA||	11011	RefSeq	17	17	17q23.3	17q23	+	57910135	58044757	ATP binding	cell cycle	nucleus
TLR1	0.873	0.038	0.731	0.009	0.837	-2.02826	7096	NM_003263	Hs.111805	Toll-like receptor 1	||TIL||TLR1||TOLL/INTERLEUKIN 1 RECEPTOR-LIKE||Toll-like receptor 1||	7096	RefSeq	4	4	4p14	4p14	-	38620443	38628978	transmembrane receptor activity	activation of NF-kappaB-inducing kinase	integral to membrane
TLR3	0.847	0.004	0.798	0.014	0.942	-1.07024	7098	NM_003265	Hs.29499	Toll-like receptor 3	||TLR3||Toll-like receptor 3||	7098	RefSeq	4	4	4q35.1	4q35	+	187365457	187381399	double-stranded RNA binding	activation of NF-kappaB-inducing kinase	integral to plasma membrane
TLR4	0.964	0.027	0.975	0.014	1.011	-0.440674	7099	NM_003266	Hs.174312	Toll-like receptor 4	||TLR4||Toll-like receptor 4||TOLL ENDOTOXIN HYPORESPONSIVENESS||TOLL, DROSOPHILA, HOMOLOG OF||	7099	RefSeq	9	9	9q33.1	9q32-q33	+	117546137	117557607	lipopolysaccharide binding	T-helper 1 type immune response	integral to membrane
TLR6	0.966	0.004	0.984	0.022	1.019	-0.367682	10333	NM_006068	Hs.366986	Toll-like receptor 6	||TLR6||Toll-like receptor 6||	10333	RefSeq	4	4	4p14	4p14	-	38650973	38653726	lipoprotein binding	T-helper 1 type immune response	integral to plasma membrane
TOPK	1.087	0.065	1.064	0.041	0.978	-0.741769	55872	NM_018492	Hs.104741	PDZ binding kinase	||PBK||PDZ binding kinase||	55872	RefSeq	8	8	8p21.1	8p21.2	-	27723058	27751268	ATP binding	mitosis	cellular component unknown
TPK1	1.03	0.036	1.035	0.019	1.004	-0.504543	27010	NM_022445	Hs.490454	Thiamin pyrophosphokinase 1	||TPK1||THIAMINE KINASE||THIAMINE PYROPHOSPHOKINASE||Thiamin pyrophosphokinase 1||	27010	RefSeq	7	7	7q35	7q34-q35	-	143586690	143970781	ATP binding	thiamin diphosphate biosynthesis
TRAD	0.991	0.06	1.062	0.043	1.071	0.10677	11139	NM_007064					RefSeq	3		3q21.2		+	125786241	125922352
TRIB2	1.118	0.016	1.074	0.007	0.961	-0.896878	28951	NM_021643	Hs.467751	Tribbles homolog 2 (Drosophila)	||TRIB2||tribbles homolog 2 (Drosophila)||	28951	RefSeq	2	2	2p24.3	2p24.3	+	12807805	12833454	ATP binding	protein amino acid phosphorylation
TRIM	0.895	0.074	0.908	0.029	1.014	-0.413302	50852	NM_016388	Hs.138701	T cell receptor associated transmembrane adaptor 1	||TRIM||TCRIM||TRAT1||TCR-INTERACTING MOLECULE||T-CELL ANTIGEN RECEPTOR-INTERACTING MOLECULE||T cell receptor associated transmembrane adaptor 1||	50852	RefSeq	3	3	3q13.13	3q13	+	110024320	110056542	transmembrane receptor protein tyrosine kinase adaptor protein activity	cellular defense response	integral to plasma membrane
TRIO	0.964	0.018	0.952	0.007	0.987	-0.659652	7204	NM_007118	Hs.130031	Triple functional domain (PTPRF interacting)	||TRIO||triple functional domain (PTPRF interacting)||	7204	RefSeq	5	5	5p15.2	5p15.1-p14	+	14196828	14562457	ATP binding	protein amino acid phosphorylation
TRPM6	0.926	0.045	0.958	0.017	1.035	-0.221697	140803	NM_017662	Hs.272225	Transient receptor potential cation channel, subfamily M, member 6	||CHAK2||TRPM6||CHANNEL KINASE 2||MELASTATIN-RELATED TRP CATION CHANNEL 6||transient receptor potential cation channel, subfamily M, member 6||	140803	RefSeq	9	9	9q21.13	9q21.13	-	74566964	74732564	ATP binding	calcium ion transport	integral to membrane
TRPM7	0.816	0.018	0.76	0.019	0.93	-1.17972	54822	NM_017672	Hs.512894	Transient receptor potential cation channel, subfamily M, member 7	||CHAK||LTRPC7||TRP-PLIK||TRPM7||TRANSIENT RECEPTOR POTENTIAL-PHOSPHOLIPASE C-INTERACTING KINASE||LONG TRANSIENT RECEPTOR POTENTIAL CHANNEL 7||transient receptor potential cation channel, subfamily M, member 7||	54822	RefSeq	15	15	15q21.2	15q21	-	48639782	48766260	ATP binding	calcium ion transport	integral to membrane
TTBK1	1.068	0.01	1.09	0.028	1.019	-0.367682	84630	XM_166453
TTBK2	0.908	0.001	0.965	0.028	1.062	0.0246531	146057	NM_173500	Hs.549247	Tau tubulin kinase 2	||TTBK2||Tau tubulin kinase 2||	146057	RefSeq	15	15	15q15.2	15q15.2	-	40825024	41000204	ATP binding	protein amino acid phosphorylation
TTK	1.036	0.019	1.031	0.021	0.994	-0.595784	7272	NM_003318	Hs.169840	TTK protein kinase	||MPS1L1||TTK||PYT||TTK protein kinase||PHOSPHOTYROSINE-PICKED THREONINE KINASE||MONOPOLAR SPINDLE 1-LIKE 1||ESK, MOUSE, HOMOLOG OF||	7272	RefSeq	6	6	6q14.1	6q13-q21	+	80771077	80808956	ATP binding	mitotic spindle checkpoint	spindle
TTN	0.983	0.028	0.992	0.012	1.009	-0.458923	7273	NM_003319	Hs.134602	Titin	||||Titin||TTN||		RefSeq	2	2	2q31.2	2q31	-	179216226	179497655	ATP binding	carbohydrate metabolism	Z disc
TXK	1.083	0.004	1.023	0.001	0.944	-1.05199	7294	NM_003328	Hs.479669	TXK tyrosine kinase	||RLK||TXK||TXK tyrosine kinase||RESTING LYMPHOCYTE KINASE||PROTEIN TYROSINE KINASE TXK||	7294	RefSeq	4	4	4p12	4p12	-	47909688	47977201	ATP binding	intracellular signaling cascade	cytoplasm
TXNDC3	1.121	0.022	1.136	0.012	1.013	-0.422426	51314	NM_016616	Hs.134079	Thioredoxin domain containing 3 (spermatozoa)	||SPTRX2||TXNDC3||SPERM-SPECIFIC THIOREDOXIN 2||THIOREDOXIN DOMAIN-CONTAINING 3||Thioredoxin domain containing 3 (spermatozoa)||	51314	RefSeq	7	7	7p14.1	7p14.1	+	37661438	37713238	ATP binding	CTP biosynthesis
TYK2	0.961	0.001	0.978	0.003	1.016	-0.395054	7297	NM_003331	Hs.75516	Tyrosine kinase 2	||TYK2||PROTEIN-TYROSINE KINASE 2||Tyrosine kinase 2||	7297	RefSeq	19	19	19p13.2	19p13.2	-	10322208	10352211	ATP binding	intracellular signaling cascade	cytoskeleton
TYRO3	0.997	0.066	1.012	0.008	1.014	-0.413302	7301	NM_006293	Hs.381282	TYRO3 protein tyrosine kinase	||TYRO3||PROTEIN TYROSINE KINASE 3||TYRO3 protein tyrosine kinase||	7301	RefSeq	15	15	15q15.1	15q15.1-q21.1	+	39638523	39658818	ATP binding	cell adhesion	integral to plasma membrane
UCK1	1.193	0.033	1.133	0.012	0.949	-1.00637	83549	NM_031432	Hs.9597	Uridine-cytidine kinase 1	||UCK1||Uridine-cytidine kinase 1||URIDINE/CYTIDINE KINASE 1||	83549	RefSeq	9	9	9q34.13	9q34.13	-	131428744	131436209	ATP binding	biosynthesis
UGP2	0.888	0.025	0.906	0.016	1.021	-0.349434	7360	NM_006759	Hs.516217	UDP-glucose pyrophosphorylase 2	||UDPG||UGPP2||UGP2||UDP-glucose pyrophosphorylase 2||URIDYL DIPHOSPHATE GLUCOSE PYROPHOSPHORYLASE 2||	7360	RefSeq	2	2	2p15	2p14-p13	+	63980664	64030346	UTP-glucose-1-phosphate uridylyltransferase activity	UDP-glucose metabolism
ULK1	0.933	0.01	0.985	0.025	1.056	-0.0300913	8408	NM_003565	Hs.47061	Unc-51-like kinase 1 (C. elegans)	||ULK1||UNC51.1||UNC51-LIKE KINASE 1||unc-51-like kinase 1 (C. elegans)||UNC51, C. ELEGANS, HOMOLOG OF||	8408	RefSeq	12	12	12q24.33	12q24.3	+	131045508	131073926	ATP binding	protein amino acid phosphorylation
ULK2	0.987	0.019	1.043	0.02	1.057	-0.0209672	9706	NM_014683	Hs.168762	Unc-51-like kinase 2 (C. elegans)	||ULK2||KIAA0623||UNC51.2||UNC51-LIKE KINASE 2||unc-51-like kinase 2 (C. elegans)||	9706	RefSeq	17	17	17p11.2	17p11.2	-	19618057	19711822	ATP binding	protein amino acid phosphorylation
UMP-CMPK	1.092	0.064	1.11	0.009	1.016	-0.395054	51727	NM_016308	Hs.11463	UMP-CMP kinase	||UMPK||UMP-CMPK||UMP/CMPK||UMK||CMK||UMP-CMP kinase||UMP/CMP KINASE||cytidylate kinase||URIDINE MONOPHOSPHATE KINASE||URIDINE MONOPHOSPHATE/CYTIDINE MONOPHOSPHATE KINASE||	51727	RefSeq	1	1	1p33		+	47511607	47556530	ATP binding	nucleobase, nucleoside, nucleotide and nucleic acid metabolism	cytoplasm
UMPK	1.076	0.001	0.995	0.038	0.925	-1.22534	7371	NM_012474	Hs.458360	Uridine-cytidine kinase 2	||TSA903||UCK2||Uridine-cytidine kinase 2||URIDINE/CYTIDINE KINASE 2||	7371	RefSeq	1	1	1q24.1	1q23	+	162528547	162608995	ATP binding	biosynthesis	cellular component unknown
URKL1	1.094	0	1.143	0.006	1.044	-0.13958	54963	NM_017859	Hs.504998	Uridine-cytidine kinase 1-like 1	||UCKL1||Uridine-cytidine kinase 1-like 1||	54963	RefSeq	20	20	20q13.33	20q13.33	-	62041634	62058212	ATP binding	biosynthesis
VRK1	1.142	0.022	1.242	0.022	1.087	0.252755	7443	NM_003384	Hs.422662	Vaccinia related kinase 1	||VRK1||VACCINIA-RELATED KINASE 1||Vaccinia related kinase 1||VACCINIA VIRUS B1R-RELATED KINASE 1||	7443	RefSeq	14	14	14q32.2	14q32	+	96333467	96417693	ATP binding	protein amino acid phosphorylation
VRK2	1.041	0.026	0.893	0	0.857	-1.84578	7444	NM_006296	Hs.468623	Vaccinia related kinase 2	||VRK2||VACCINIA-RELATED KINASE 2||Vaccinia related kinase 2||VACCINIA VIRUS B1R-RELATED KINASE 2||	7444	RefSeq	2	2	2p16.1	2p16-p15	+	58185476	58298654	ATP binding	protein amino acid phosphorylation	integral to membrane
VRK3	1.112	0.031	1.093	0.02	0.983	-0.696148	51231	NM_016440	Hs.443330	Vaccinia related kinase 3	||VRK3||Vaccinia related kinase 3||	51231	RefSeq	19	19	19q13.33	19q13	-	55171539	55220448	ATP binding	protein amino acid phosphorylation
WEE1	0.929	0.025	0.877	0.029	0.944	-1.05199	7465	NM_003390	Hs.249441	WEE1 homolog (S. pombe)	||WEE1||WEE 1 TYROSINE KINASE||WEE1 homolog (S. pombe)||	7465	RefSeq	11	11	11p15.4	11p15.3-p15.1	+	9550915	9567874	ATP binding	cytokinesis	nucleus
WIF1	0.821	0.009	0.882	0.015	1.073	0.125018	11197	NM_007191	Hs.284122	WNT inhibitory factor 1	||WIF1||WNT inhibitory factor 1||	11197	RefSeq	12	12	12q14.3	12q14.3	-	63730675	63801356	protein-tyrosine kinase activity	Wnt receptor signaling pathway
XYLB	1.008	0.017	0.981	0.024	0.972	-0.796513	9942	NM_005108	Hs.356820	Xylulokinase homolog (H. influenzae)	||XYLB||xylulokinase homolog (H. influenzae)||XYLULOKINASE, H. INFLUENZAE, HOMOLOG OF||	9942	RefSeq	3	3	3p22.2	3p22-p21.3	+	38363243	38431471	kinase activity	carbohydrate metabolism
YES1	1.006	0	1.038	0.015	1.032	-0.249069	7525	NM_005433	Hs.194148	V-yes-1 Yamaguchi sarcoma viral oncogene homolog 1	||YES1||ONCOGENE YES1||YAMAGUCHI SARCOMA ONCOGENE||v-yes-1 Yamaguchi sarcoma viral oncogene homolog 1||	7525	RefSeq	18	18	18p11.32	18p11.31-p11.21	-	711742	746837	ATP binding	intracellular signaling cascade
YWHAH	1.084	0.056	1.11	0.017	1.024	-0.322061	7533	NM_003405	Hs.226755	Tyrosine 3-monooxygenase/tryptophan 5-monooxygenase activation protein, eta polypeptide	||YWHA1||14-3-3-ETA||YWHAH||BRAIN PROTEIN 14-3-3, ETA ISOFORM||TYROSINE 3-MONOOXYGENASE/TRYPTOPHAN 5-MONOOXYGENASE ACTIVATION PROTEIN 1||Tyrosine 3-monooxygenase/tryptophan 5-monooxygenase activation protein, eta polypeptide||TYROSINE 3-MONOOXYGENASE/TRYPTOPHAN 5-MONOOXYGENASE ACTIVATION PROTEIN, ETA ISOFORM||	7533	RefSeq	22	22	22q12.3	22q12.3	+	30665082	30678143	actin binding	cytoskeleton organization and biogenesis	cytoplasm
YWHAQ	1.042	0.006	1.019	0.038	0.978	-0.741769	10971	NM_006826	Hs.74405	Tyrosine 3-monooxygenase/tryptophan 5-monooxygenase activation protein, theta polypeptide	||14-3-3-THETA||YWHAQ||14-3-3-TAU||HS1||14-3-3 PROTEIN, T-CELL||TYROSINE 3-MONOOXYGENASE/TRYPTOPHAN 5-MONOOXYGENASE ACTIVATION PROTEIN, THETA ISOFORM||Tyrosine 3-monooxygenase/tryptophan 5-monooxygenase activation protein, theta polypeptide||	10971	RefSeq	2	2	2p25.1	2p25.1	-	9674703	9721704	protein domain specific binding	exocytosis
ZAK	1.191	0.005	1.279	0.018	1.073	0.125018	51776	NM_133646	Hs.444451	Sterile alpha motif and leucine zipper containing kinase AZK	||||ZAK||Sterile alpha motif and leucine zipper containing kinase AZK||		RefSeq	2	2	2q31.1	2q24.2	+	173766076	173917378	ATP binding	DNA damage checkpoint	cellular component unknown
ZAP70	1.114	0.048	1.032	0.009	0.925	-1.22534	7535	NM_001079	Hs.234569	Zeta-chain (TCR) associated protein kinase 70kDa	||STD||SRK||ZAP70||ZETA-CHAIN-ASSOCIATED PROTEIN KINASE||SYK-RELATED TYROSINE KINASE||PROTEIN TYROSINE KINASE ZAP70||zeta-chain (TCR) associated protein kinase 70kDa||ZETA-ASSOCIATED PROTEIN, 70-KD SELECTIVE T-CELL DEFECT||	7535	RefSeq	2	2	2q11.2	2q12	+	97788548	97814841	ATP binding	immune response	immunological synapse
TNFRSF10A	1.086	0.036	1.044	0.043	0.961	-0.896878	8797	NM_003844	Hs.401745	Tumor necrosis factor receptor superfamily, member 10a	||APO2||TNFRSF10A||DR4||TRAILR1||DEATH RECEPTOR 4||TNF-RELATED APOPTOSIS-INDUCING LIGAND RECEPTOR 1||Tumor necrosis factor receptor superfamily, member 10a||	8797	RefSeq	8	8	8p21.3	8p21	-	23104915	23138584	TRAIL binding	activation of NF-kappaB-inducing kinase	integral to membrane
TNK1	1.242	0.076	1.219	0.031	0.981	-0.714396	8711	NM_003985	Hs.203420	Tyrosine kinase, non-receptor, 1	||TNK1||CD38-NEGATIVE KINASE||TYROSINE KINASE, NONRECEPTOR, 1||Tyrosine kinase, non-receptor, 1||	8711	RefSeq	17	17	17p13.1	17p13.1	+	7225133	7233780	ATP binding	autophosphorylation	cytoplasm
TSKS	1.027	0.008	1.032	0.024	1.004	-0.504543	60385	NM_021733	Hs.515858	Testis-specific kinase substrate	||TSKS||Testis-specific kinase substrate||	60385	RefSeq	19	19	19q13.33	19q13.3	-	54934822	54958327
ADCYAP1R1	1.073	0.048	0.999	0.025	0.931	-1.1706	117	NM_001118	Hs.377783	Adenylate cyclase activating polypeptide 1 (pituitary) receptor type I	||ADCYAP1R1||PACAPRI||PACAP RECEPTOR, TYPE I||ADENYLATE CYCLASE-ACTIVATING POLYPEPTIDE 1, RECEPTOR FOR||PITUITARY ADENYLATE CYCLASE-ACTIVATING POLYPEPTIDE RECEPTOR, TYPE I||type I adenylate cyclase activating polypeptide receptor precursor||adenylate cyclase activating polypeptide 1 (pituitary) receptor type 1||adenylate cyclase activating polypeptide 1 (pituitary) receptor type I||	117	RefSeq	7	7	7p14.3	7p14	+	30865381	30919551	G-protein coupled receptor activity	G-protein coupled receptor protein signaling pathway	integral to plasma membrane
ADMR	0.748	0.041	0.765	0.007	1.022	-0.34031	11318	NM_007264	Hs.483909	Adrenomedullin receptor	||ADMR||AMR||Adrenomedullin receptor||	11318	RefSeq	12	12	12q13.3	12q13.3	+	55674621	55676735	G-protein coupled receptor activity, unknown ligand	G-protein coupled receptor protein signaling pathway	integral to membrane
ADORA1	1.186	0.014	1.045	0.007	0.881	-1.6268	134	NM_000674	Hs.77867	Adenosine A1 receptor	||ADORA1||RDC7||adenosine A1 receptor||	134	RefSeq	1	1	1q32.1	1q32.1	+	199791438	199868189	A1 adenosine receptor activity, G-protein coupled	G-protein coupled receptor protein signaling pathway	integral to plasma membrane
ADORA2A	1.166	0.023	1.037	0.03	0.889	-1.55381	135	NM_000675	Hs.197029	Adenosine A2a receptor	||hA2aR||ADORA2A||RDC8||adenosine A2 receptor||adenosine A2a receptor||adenosine receptor subtype A2a||	135	RefSeq	22	22	22q11.23	22q11.23	+	23153645	23162878	A2A adenosine receptor activity, G-protein coupled	G-protein coupled receptor protein signaling pathway	integral to membrane
ADORA2B	1.194	0.021	1.036	0.019	0.867	-1.75454	136	NM_000676	Hs.167046	Adenosine A2b receptor	||ADORA2B||adenosine A2b receptor||	136	RefSeq	17	17	17p12	17p12-p11.2	+	15788955	15819935	A2B adenosine receptor activity, G-protein coupled	G-protein coupled receptor protein signaling pathway	integral to plasma membrane
ADORA3	1.067	0.014	0.996	0.015	0.933	-1.15235	140	NM_000677	Hs.281342	Adenosine A3 receptor	||||ADORA3||Adenosine A3 receptor||		RefSeq	1	1	1p13.2	1p21-p13	-	111754096	111758785	A3 adenosine receptor activity, G-protein coupled	G-protein coupled receptor protein signaling pathway	integral to plasma membrane
ADRA1A	1.09	0.023	0.976	0.031	0.895	-1.49907	148	NM_000680	Hs.52931	Adrenergic, alpha-1A-, receptor	||ADRA1L1||ALPHA1AAR||ADRA1A||ADRA1C, FORMERLY||adrenergic, alpha-1A-, receptor||adrenergic, alpha-1C-, receptor||ALPHA-1C-ADRENERGIC RECEPTOR, FORMERLY||G protein coupled receptor||alpha-1A-adrenergic receptor isoform 4||adrenergic, alpha -1A-, receptor||alpha-1A-adrenergic receptor isoform 3||alpha-1A-adrenergic receptor isoform 2||alpha-1A-adrenergic receptor isoform 1||adrenergic, alpha-1A-, …	148	RefSeq	8	8	8p21.2	8p21-p11.2	-	26683138	26778839	adrenoceptor activity	G-protein coupled receptor protein signaling pathway	integral to plasma membrane
ADRA1B	1.051	0.008	1.069	0	1.017	-0.38593	147	NM_000679	Hs.368632	Adrenergic, alpha-1B-, receptor	||ALPHA1BAR||ADRA1B||alpha-1B-adrenergic receptor||ALPHA-1-ADRENERGIC RECEPTOR||adrenergic, alpha-1B-, receptor||adrenergic, alpha -1B-, receptor||	147	RefSeq	5	5	5q33.3	5q23-q32	+	159276317	159332129	adrenoceptor activity	G-protein coupled receptor protein signaling pathway	integral to plasma membrane
ADRA1D	0.953	0.009	0.879	0.003	0.922	-1.25272	146	NM_000678	Hs.557	Adrenergic, alpha-1D-, receptor	||ADRA1D||ADRA1R||DAR||ALPHA1||ADRA1A, FORMERLY||alpha-1D-adrenergic receptor||ALPHA-1A-ADRENERGIC RECEPTOR, FORMERLY||adrenergic, alpha-1A-, receptor||adrenergic, alpha-1D-, receptor||adrenergic, alpha -1D-, receptor||dJ779E11.2 (adrenergic, alpha-1D-, receptor (alpha 1D-adrenoreceptor))||adrenergic, alpha-1D-, receptor (NOTE: redefinition of symbol)||	146	RefSeq	20	20	20p13	20p13	-	4149815	4177659	adrenoceptor activity	DNA metabolism	integral to plasma membrane
ADRA2A	0.969	0.022	0.987	0.014	1.018	-0.376806	150	NM_000681	Hs.249159	Adrenergic, alpha-2A-, receptor	||ALPHA2AAR||ZNF32||ADRA2R||ADRA2A||OTTHUMP00000058849||ADRAR||alpha-2A-adrenergic receptor||ADRENOCEPTOR, ALPHA-2A||alpha-2AAR subtype C10||adrenergic, alpha-2A-, receptor||ALPHA-2-ADRENERGIC RECEPTOR, PLATELET TYPE||	150	RefSeq	10	10	10q25.2	10q24-q26	+	112826910	112830560	adrenoceptor activity	G-protein coupled receptor protein signaling pathway	integral to plasma membrane
ADRA2B	1.046	0.014	0.958	0.005	0.916	-1.30746	151	NM_000682	Hs.247686	Adrenergic, alpha-2B-, receptor	||ADRA2L1||ADRARL1||ADRA2RL1||ADRA2B||ALPHA2BAR||alpha-2B-adrenergic receptor||G-protein coupled receptor||adrenergic, alpha-2B-, receptor||alpha-2-adrenergic receptor-like 1||adrenergic receptor alpha 2B||	151	RefSeq	2	2	2q11.2	2p13-q13	-	96200496	96203762	adrenoceptor activity	G-protein coupled receptor protein signaling pathway	integral to plasma membrane
ADRA2C	1.144	0.012	1.019	0.001	0.89	-1.54469	152	NM_000683	Hs.123022	Adrenergic, alpha-2C-, receptor	||ALPHA2CAR||ADRA2L2||ADRARL2||ADRA2C||ADRA2RL2||alpha2-AR-C4||alpha-2C-adrenergic receptor||adrenergic, alpha-2C-, receptor||ALPHA-2-ADRENERGIC RECEPTOR, RENAL TYPE||	152	RefSeq	4	4	4p16.3	4p16	+	3804398	3807217	adrenoceptor activity	G-protein coupled receptor protein signaling pathway	endosome
ADRB1	1.184	0.026	0.974	0.028	0.822	-2.16512	153	NM_000684	Hs.99913	Adrenergic, beta-1-, receptor	||B1AR||ADRB1||RHR||ADRB1R||BETA1AR||beta-1-adrenergic receptor||Adrenergic, beta-1-, receptor||	153	RefSeq	10	10	10q25.3	10q24-q26	+	115793804	115795518	beta1-adrenergic receptor activity	G-protein coupled receptor protein signaling pathway	integral to plasma membrane
ADRB2	1.196	0.015	0.968	0.044	0.809	-2.28374	154	NM_000024	Hs.2551	Adrenergic, beta-2-, receptor, surface	||BAR||ADRBR||ADRB2||B2AR||BETA2AR||BETA-2-ADRENOCEPTOR||BETA-ADRENERGIC RECEPTOR||BETA-2-ADRENERGIC RECEPTOR||catecholamine receptor||beta-2 adrenoceptor||beta-2 adrenergic receptor||Adrenergic, beta-2-, receptor, surface||ADRB2R BETA-2-ADRENORECEPTOR AGONIST, REDUCED RESPONSE TO||	154	RefSeq	5	5	5q32	5q31-q32	+	148186368	148188379	beta2-adrenergic receptor activity	G-protein coupled receptor protein signaling pathway	endosome
ADRB3	1.064	0.015	0.864	0.019	0.812	-2.25636	155	NM_000025	Hs.2549	Adrenergic, beta-3-, receptor	||ADRB3||BETA3AR||BETA-3-ADRENERGIC RECEPTOR||Adrenergic, beta-3-, receptor||Beta-3 Adrenergic Receptor||	155	RefSeq	8	8	8p12	8p12-p11.2	-	37939672	37943341	beta3-adrenergic receptor activity	G-protein signaling, coupled to cAMP nucleotide second messenger	integral to plasma membrane
ADRBK1	1.006	0.001	0.903	0.046	0.897	-1.48082	156	NM_001619	Hs.83636	Adrenergic, beta, receptor kinase 1	||BETA-ARK1||GRK2||BARK1||2.7.1.126||ADRBK1||BETA-ADRENERGIC RECEPTOR KINASE 1||Adrenergic, beta, receptor kinase 1||G PROTEIN-DEPENDENT RECEPTOR KINASE 2||beta adrenergic receptor kinase 1||	156	RefSeq	11	11	11q13.2	11q13	+	66790668	66810945	ATP binding	protein amino acid phosphorylation	cytoplasm
ADRBK2	1.16	0.055	0.959	0.001	0.826	-2.12863	157	NM_005160	Hs.517493	Adrenergic, beta, receptor kinase 2	||GRK3||BARK2||2.7.1.126||ADRBK2||BETA-ADRENERGIC RECEPTOR KINASE 2||Adrenergic, beta, receptor kinase 2||beta adrenergic receptor kinase 2||	157	RefSeq	22	22	22q11.23	22q11	+	24285499	24444470	ATP binding	protein amino acid phosphorylation
AGTR1	1.146	0.019	0.998	0.016	0.871	-1.71804	185	NM_000685	Hs.477887	Angiotensin II receptor, type 1	||HAT1R||AG2S||AGTR1||AT1B||AT2R1A||AT2R1B||AGTR1B||ANGIOTENSIN RECEPTOR 1A||AGTR1A ANGIOTENSIN RECEPTOR 1B||type-1B angiotensin II receptor||angiotensin II receptor, type 1||ANGIOTENSIN II RECEPTOR, VASCULAR TYPE 1||	185	RefSeq	3	3	3q24	3q21-q25	+	149898362	149943486	C-X-C chemokine receptor activity	G-protein coupled receptor protein signaling pathway	integral to membrane
AGTR2	1.077	0.03	0.919	0.019	0.853	-1.88228	186	NM_000686	Hs.405348	Angiotensin II receptor, type 2	||AT2||ATGR2||AGTR2||angiotensin receptor 2||angiotensin II receptor, type 2||AGTR2 MENTAL RETARDATION, X-LINKED NONSYNDROMIC, AGTR2-RELATED||	186	RefSeq	X	X	Xq23	Xq22-q23	+	115113884	115117702	angiotensin type II receptor activity	G-protein coupled receptor protein signaling pathway	integral to plasma membrane
AGTRL1	0.978	0.009	0.871	0.004	0.891	-1.53556	187	NM_005161	Hs.438311	Angiotensin II receptor-like 1	||MGC45246||AGTRL1||angiotensin receptor-like 1||angiotensin II receptor-like 1||APJ PUTATIVE RECEPTOR PROTEIN RELATED TO ANGIOTENSIN RECEPTOR||	187	RefSeq	11	11	11q12.1	11q12	-	56757629	56761364	receptor activity	G-protein coupled receptor protein signaling pathway	integral to membrane
AKT1	1.083	0.019	1.009	0	0.932	-1.16148	207	NM_005163	Hs.525622	V-akt murine thymoma viral oncogene homolog 1	||AKT1||PRKBA||PKB-ALPHA||2.7.1.37||MGC99656||ONCOGENE AKT1||AKT1 protein||RAC-alpha serine/threonine-protein kinase||PROTEIN KINASE B-ALPHA||RAC SERINE/THREONINE PROTEIN KINASE||rac protein kinase alpha||murine thymoma viral (v-akt) oncogene homolog-1||V-akt murine thymoma viral oncogene homolog 1||	207	RefSeq	14	14	14q32.33	14q32.32	-	104306752	104330608	ATP binding	G-protein coupled receptor protein signaling pathway	nucleus
ARL3	1.008	0.011	0.988	0.033	0.98	-0.723521	403	NM_004311	Hs.182215	ADP-ribosylation factor-like 3	||ARL3||ARFL3||ARF-like 3||ADP-ribosylation factor-like 3||	403	RefSeq	10	10	10q24.32	10q23.3	-	104423479	104464180	GTP binding	G-protein coupled receptor protein signaling pathway
ARRB1	1.044	0.051	0.981	0.013	0.939	-1.09761	408	NM_004041	Hs.503284	Arrestin, beta 1	||ARRB1||ARB1||ARR1||BETA-ARRESTIN 1||ARRESTIN, BETA, 1||Arrestin, beta 1||arrestin beta 1 isoform B||arrestin beta 1 isoform A||	408	RefSeq	11	11	11q13.4	11q13	-	74654810	74740299	enzyme inhibitor activity	sensory perception	cytoplasm
AVPR1A	1.083	0.063	1.014	0.019	0.936	-1.12498	552	NM_000706	Hs.2131	Arginine vasopressin receptor 1A	||AVPR1A||V1a vasopressin receptor||V1-vascular vasopressin receptor AVPR1A||vascular/hepatic-type arginine vasopressin receptor||antidiuretic hormone receptor 1A||arginine vasopressin receptor 1A||SCCL vasopressin subtype 1a receptor||	552	RefSeq	12	12	12q14.2	12q14-q15	-	61826482	61832857	protein kinase C binding	G-protein coupled receptor protein signaling pathway	endosome
AVPR1B	1.083	0.029	1.026	0.003	0.947	-1.02461	553	NM_000707	Hs.1372	Arginine vasopressin receptor 1B	||AVPR3||AVPR1B||vasopressin V1B receptor||pituitary vasopressin receptor 3||antidiuretic hormone receptor 1B||arginine vasopressin receptor 3||arginine vasopressin receptor 1B||ANTIDIURETIC HORMONE, RECEPTOR FOR, V1B||	553	RefSeq	1	1	1q32.1	1q32	+	202767010	202774698	protein kinase C binding	G-protein coupled receptor protein signaling pathway	endosome
AVPR2	1.177	0.002	0.979	0.028	0.831	-2.08301	554	NM_000054	Hs.2524	Arginine vasopressin receptor 2 (nephrogenic diabetes insipidus)	||NSIAD||ADHR||DIR3||DI1||AVPR2||V2R||ANTIDIURETIC HORMONE RECEPTOR||VASOPRESSIN V2 RECEPTOR||DIABETES INSIPIDUS, NEPHROGENIC, X-LINKED||NEPHROGENIC SYNDROME OF INAPPROPRIATE ANTIDIURESIS||NDI ARGININE VASOPRESSIN RECEPTOR 2||DIABETES INSIPIDUS, NEPHROGENIC, TYPE I||Arginine vasopressin receptor 2 (nephrogenic diabetes insipidus)||	554	RefSeq	X	X	Xq28	Xq28	+	152691216	152693487	receptor activity	G-protein coupled receptor protein signaling pathway	Golgi apparatus
BAI1	1.084	0.02	0.968	0.033	0.893	-1.51731	575	NM_001702	Hs.194654	Brain-specific angiogenesis inhibitor 1	||BAI1||Brain-specific angiogenesis inhibitor 1||brain-specific angiogenesis inhibitor 1 precursor||	575	RefSeq	8	8	8q24.3	8q24	+	143542378	143623369	G-protein coupled receptor activity	axonogenesis	integral to plasma membrane
BAI2	0.936	0.008	0.917	0.014	0.98	-0.723521	576	NM_001703	Hs.524138	Brain-specific angiogenesis inhibitor 2	||BAI2||Brain-specific angiongenesis inhibitor-2||Brain-specific angiogenesis inhibitor 2||	576	RefSeq	1	1	1p35.2	1p35	-	31861811	31898729	G-protein coupled receptor activity	neuropeptide signaling pathway	integral to membrane
BAI3	1.049	0.008	1.012	0.007	0.964	-0.869506	577	NM_001704	Hs.13261	Brain-specific angiogenesis inhibitor 3	||BAI3||KIAA0550||Brain-specific angiogenesis inhibitor 3||dJ91B17.1 (brain-specific angiogenesis inhibitor 3)||	577	RefSeq	6	6	6q12	6q12	+	69404157	70156120	G-protein coupled receptor activity	neuropeptide signaling pathway	cell surface
BDKRB1	0.864	0.025	0.914	0.019	1.058	-0.0118431	623	NM_000710	Hs.553486	Bradykinin receptor B1	||BDKRB1||BKB1R||BRADYB1||BKR1||B1BKR||BK-1 receptor||bradykinin B1 receptor||bradykinin receptor B1||bradykinin receptor 1||	623	RefSeq	14	14	14q32.2	14q32.1-q32.2	+	95792311	95800851	bradykinin receptor activity	G-protein coupled receptor protein signaling pathway	endoplasmic reticulum
BDKRB2	1.141	0.017	1.147	0.01	1.005	-0.495419	624	NM_000623	Hs.525572	Bradykinin receptor B2	||BK-2||B2R||BDKRB2||BKR2||DKFZp686O088||BK2||BRB2||BRADYKININ RECEPTOR 2||bradykinin receptor B2||	624	RefSeq	14	14	14q32.2	14q32.1-q32.2	+	95740949	95780536	bradykinin receptor activity	G-protein coupled receptor protein signaling pathway	integral to plasma membrane
BLR1	0.866	0.011	0.903	0.011	1.042	-0.157828	643	NM_001716	Hs.113916	Burkitt lymphoma receptor 1, GTP binding protein (chemokine (C-X-C motif) receptor 5)	||MDR15||BLR1||CXCR5||monocyte-derived receptor 15||CHEMOKINE (C-X-C) RECEPTOR 5||C-X-C chemokine receptor type 5||Burkitt lymphoma receptor 1 isoform 2||Burkitt lymphoma receptor 1, GTP-binding protein||Burkitt lymphoma receptor 1 isoform 1||Burkitt lymphoma receptor 1, GTP binding protein (chemokine (C-X-C motif) receptor 5)||	643	RefSeq	11	11	11q23.3	11q23.3	+	118259776	118272180	C-X-C chemokine receptor activity	B cell activation	integral to plasma membrane
BRS3	1.187	0.025	1.132	0.027	0.953	-0.96987	680	NM_001727	Hs.121484	Bombesin-like receptor 3	||BRS3||G-protein coupled receptor||Bombesin-like receptor 3||bombesin receptor subtype 3||	680	RefSeq	X	X	Xq26.3	Xq26-q28	+	135295644	135300118	bombesin receptor activity	G-protein coupled receptor protein signaling pathway	integral to membrane
C17ORF35	1.206	0.024	1.11	0.001	0.92	-1.27096	8834	NM_003876	Hs.514009	Chromosome 17 open reading frame 35	||C17orf35||Chromosome 17 open reading frame 35||	8834	RefSeq	17	17	17p11.2	17p11.2	-	21041854	21097361	G-protein coupled receptor activity	signal transduction	integral to plasma membrane
C3	1.301	0.025	1.15	0.016	0.884	-1.59943	718	NM_000064	Hs.529053	Complement component 3	||ASP||C3||INCLUDED||3.4.21.43||C3a||C3 C3b||complement component C3||Complement component 3||C3 DEFICIENCY, AUTOSOMAL RECESSIVE||complement component 3 precursor||acylation-stimulating protein cleavage product||COMPLEMENT COMPONENT 3 DEFICIENCY, AUTOSOMAL RECESSIVE||	718	RefSeq	19	19	19p13.3	19p13.3-p13.2	-	6628877	6671660	endopeptidase inhibitor activity	G-protein coupled receptor protein signaling pathway	extracellular region
C3AR1	1.16	0.039	1.071	0.022	0.923	-1.24359	719	NM_004054	Hs.551500	Complement component 3a receptor 1	||HNFAG09||C3AR1||AZ3B||COMPLEMENT COMPONENT 3a RECEPTOR 1||complement component 3 receptor 1||	719	RefSeq	12	12	12p13.31	12p13.31	-	8102185	8110222	C3a anaphylatoxin receptor activity	G-protein coupled receptor protein signaling pathway	integral to plasma membrane
C5	1.313	0.017	1.157	0.013	0.88	-1.63593	727	NM_001735	Hs.494997	Complement component 5	||C5||anaphylatoxin C5a analog||Complement component 5||COMPLEMENT COMPONENT 5 DEFICIENCY||C5 DEFICIENCY COMPLEMENT COMPONENT 5||	727	RefSeq	9	9	9q33.2	9q33-q34	-	120794168	120892108	chemokine activity	G-protein coupled receptor protein signaling pathway	extracellular space
C5R1	1.032	0.019	0.989	0.025	0.957	-0.933374	728	NM_001736	Hs.2161	Complement component 5 receptor 1 (C5a ligand)	||CD88||C5AR||C5R1||C5a receptor||C5a ANAPHYLATOXIN RECEPTOR||complement component-5 receptor-2 (C5a ligand)||complement component 5 receptor 1 (C5a ligand)||	728	RefSeq	19	19	19q13.32	19q13.3-q13.4	+	52504970	52517163	C5a anaphylatoxin receptor activity	G-protein coupled receptor protein signaling pathway	integral to plasma membrane
C7ORF9	1.068	0.027	1.005	0.003	0.94	-1.08848	64111	NM_022150	Hs.60473	Chromosome 7 open reading frame 9	||C7orf9||Chromosome 7 open reading frame 9||	64111	RefSeq	7	7	7p15.3	7p21-p15	-	25037432	25041345	G-protein coupled receptor activity	neuropeptide signaling pathway	membrane
CALCA	0.887	0.007	0.896	0.031	1.01	-0.449798	796	NM_001741	Hs.546242	Calcitonin/calcitonin-related polypeptide, alpha	||katacalcin||CALC1||CGRP-I||CALCA||CGRP1||KC||Calcitonin/calcitonin-related polypeptide, alpha||CT CALCITONIN GENE-RELATED PEPTIDE||	796	RefSeq	11	11	11p15.2	11p15.2-p15.1	-	14946625	14950427	hormone activity	G-protein signaling, coupled to cAMP nucleotide second messenger	endoplasmic reticulum
CALCR	1.081	0.024	1.058	0.011	0.978	-0.741769	799	NM_001742	Hs.489127	Calcitonin receptor	||CTR1||CRT||CALCR||Calcitonin receptor||	799	RefSeq	7	7	7q21.3	7q21.3	-	92698449	92848401	G-protein coupled receptor activity	G-protein coupled receptor protein signaling pathway	integral to plasma membrane
CALCRL	1.027	0	0.996	0.028	0.969	-0.823885	10203	NM_005795	Hs.470882	Calcitonin receptor-like	||CALCRL||CGRPR||CRLR||Calcitonin receptor-like||CALCITONIN RECEPTOR-LIKE GENE||CALCITONIN RECEPTOR-LIKE RECEPTOR||CALCITONIN GENE-RELATED PEPTIDE RECEPTOR||	10203	RefSeq	2	2	2q32.1	2q32.1	-	188035337	188138484	G-protein coupled receptor activity	G-protein signaling, coupled to cyclic nucleotide second messenger	integral to plasma membrane
CALM1	1.072	0.002	1.038	0.009	0.968	-0.833009	801	NM_006888	Hs.282410	Calmodulin 1 (phosphorylase kinase, delta)	||||CALM1||Calmodulin 1 (phosphorylase kinase, delta)||		RefSeq	14	14	14q32.11	14q24-q31	+	89933129	89944148
CASR	1.22	0.018	1.099	0.014	0.9	-1.45345	846	NM_000388	Hs.435615	Calcium-sensing receptor (hypocalciuric hypercalcemia 1, severe neonatal hyperparathyroidism)	||FHH||CASR||FIH||GPRC2A||HHC1||NSHPT||calcium sensing receptor||PCAR1 HYPERCALCIURIC HYPERCALCEMIA||extracellular calcium-sensing receptor||parathyroid Ca(2+)-sensing receptor 1||Calcium-sensing receptor (hypocalciuric hypercalcemia 1, severe neonatal hyperparathyroidism)||HYPOCALCEMIA, AUTOSOMAL DOMINANT, WITH BARTTER SYNDROME CALCIUM, SERUM LEVELS OF||	846	RefSeq	3	3	3q21.1	3q21-q24	+	123385219	123488032	metabotropic glutamate, GABA-B-like receptor activity	calcium ion homeostasis	integral to plasma membrane
CCBP2	1.208	0.04	1.084	0.022	0.897	-1.48082	1238	NM_001296	Hs.185692	Chemokine binding protein 2	||CCR10||CCR9||CMKBR9||hD6||CCBP2||CHEMOKINE-BINDING PROTEIN 2||chemokine receptor D6||CC-chemokine-binding receptor JAB61||chemokine (C-C) receptor 9||Chemokine binding protein 2||chemokine (C-C motif) receptor 9||	1238	RefSeq	3	3	3p22.1	3p21.3	+	42825979	42883778	C-C chemokine receptor activity	G-protein coupled receptor protein signaling pathway	integral to plasma membrane
CCL17	0.909	0.021	0.892	0.001	0.98	-0.723521	6361	NM_002987	Hs.546294	Chemokine (C-C motif) ligand 17	||CCL17||TARC||SCYA17, FORMERLY||THYMUS AND ACTIVATION-REGULATED CHEMOKINE||CHEMOKINE, CC MOTIF, LIGAND 17||chemokine (C-C motif) ligand 17||SMALL INDUCIBLE CYTOKINE SUBFAMILY A, MEMBER 17, FORMERLY||	6361	RefSeq	16	16	16q13	16q13	+	55996179	56007475	chemokine activity	G-protein coupled receptor protein signaling pathway	extracellular region
CCL2	1.061	0.003	0.996	0.014	0.938	-1.10673	6347	NM_002982	Hs.303649	Chemokine (C-C motif) ligand 2	||SCYA2||CCL2||MCAF||MCP1||MONOCYTE CHEMOTACTIC PROTEIN 1||SMALL INDUCIBLE CYTOKINE A2||MONOCYTE CHEMOTACTIC AND ACTIVATING FACTOR||chemokine (C-C motif) ligand 2||	6347	RefSeq	17	17	17q12	17q11.2-q21.1	+	29606410	29608331	chemokine activity	G-protein signaling, coupled to cyclic nucleotide second messenger	extracellular space
CCL23	1.212	0.006	1.129	0.012	0.931	-1.1706	6368	NM_005064	Hs.169191	Chemokine (C-C motif) ligand 23	||MPIF1||CCL23||CK-BETA-8||SCYA23, FORMERLY||MYELOID PROGENITOR INHIBITORY FACTOR 1||chemokine (C-C motif) ligand 23||CHEMOKINE, CC MOTIF, LIGAND 23||SMALL INDUCIBLE CYTOKINE SUBFAMILY A, MEMBER 23, FORMERLY||	6368	RefSeq	17	17	17q12	17q12	-	31364209	31369118	chemokine activity	G-protein coupled receptor protein signaling pathway	extracellular region
CCL25	1.155	0.007	1.091	0.003	0.944	-1.05199	6370	NM_005624	Hs.310511	Chemokine (C-C motif) ligand 25	||TECK||CCL25||THYMUS-EXPRESSED CHEMOKINE||SCYA25, FORMERLY||chemokine (C-C motif) ligand 25||CHEMOKINE, CC MOTIF, LIGAND 25||SMALL INDUCIBLE CYTOKINE SUBFAMILY A, MEMBER 25, FORMERLY||	6370	RefSeq	19	19	19p13.2	19p13.2	+	8023933	8033547	chemokine activity	G-protein coupled receptor protein signaling pathway	extracellular region
CCL3	0.941	0.012	0.909	0.025	0.966	-0.851258	6348	NM_002983	Hs.514107	Chemokine (C-C motif) ligand 3	||LD78-ALPHA||MIP1A||CCL3||SCYA3, FORMERLY||MACROPHAGE INFLAMMATORY PROTEIN 1-ALPHA||chemokine (C-C motif) ligand 3||SMALL INDUCIBLE CYTOKINE A3, FORMERLY||CHEMOKINE, CC MOTIF, LIGAND 3||	6348	RefSeq	17	17	17q12	17q11-q21	-	31439717	31441600	chemokine activity	G-protein coupled receptor protein signaling pathway	extracellular region
CCR1	0.975	0.026	1.031	0.014	1.058	-0.0118431	1230	NM_001295	Hs.301921	Chemokine (C-C motif) receptor 1	||CMKBR1||SCYAR1||HM145||MIP1aR||CCR1||CKR-1||CKR1||MACROPHAGE INFLAMMATORY PROTEIN 1-ALPHA/RANTES RECEPTOR||CHEMOKINE, CC MOTIF, RECEPTOR 1||chemokine (C-C motif) receptor 1||	1230	RefSeq	3	3	3p21.31	3p21	-	46218731	46224819	C-C chemokine receptor activity	G-protein signaling, coupled to cyclic nucleotide second messenger	integral to plasma membrane
CCR2	1.136	0.005	1.017	0.025	0.894	-1.50819	1231	NM_000647	Hs.511794	Chemokine (C-C motif) receptor 2	||CCR2B||CMKBR2||MCP-1-R||CKR2A||CCR2||CKR2B||CC-CKR-2||MCP-1 receptor||MCP1 RECEPTOR CCR2A||chemokine (C-C) receptor 2||chemokine (C-C motif) receptor 2||monocyte chemotactic protein 1 receptor||monocyte chemoattractant protein 1 receptor||CHEMOKINE, CC MOTIF, RECEPTOR 2||chemokine (C-C motif) receptor 2 isoform A||chemokine (C-C motif) receptor 2 isoform B||	1231	RefSeq	3	3	3p21.31	3p21	+	46370643	46377423	C-C chemokine receptor activity	G-protein coupled receptor protein signaling pathway	integral to plasma membrane
CCR3	0.921	0	0.943	0.014	1.023	-0.331186	1232	NM_001837	Hs.506190	Chemokine (C-C motif) receptor 3	||CMKBR3||CCR3||CC-CKR-3||CKR3||b-chemokine receptor||eosinophil eotaxin receptor||chemokine (C-C motif) receptor 3||CHEMOKINE, CC MOTIF, RECEPTOR 3||eosinophil CC chemokine receptor 3||	1232	RefSeq	3	3	3p21.31	3p21.3	+	46258691	46283166	C-C chemokine receptor activity	G-protein coupled receptor protein signaling pathway	integral to plasma membrane
CCR4	1.032	0.036	1.002	0.011	0.97	-0.814761	1233	NM_005508	Hs.184926	Chemokine (C-C motif) receptor 4	||K5-5||CC-CKR-4||CMKBR4||ChemR13||MGC88293||CKR4||CCR4||HGCN:14099||chemokine (C-C) receptor 4||chemokine (C-C motif) receptor 4||CHEMOKINE, CC MOTIF, RECEPTOR 4||	1233	RefSeq	3	3	3p23	3p24	+	32968069	32971407	C-C chemokine receptor activity	G-protein coupled receptor protein signaling pathway	integral to plasma membrane
CCR5	1.095	0.016	0.998	0.011	0.911	-1.35308	1234	NM_000579	Hs.546245	Chemokine (C-C motif) receptor 5	||CC-CKR-5||CMKBR5||chemr13||CCCKR5||CCR5||CD195||chemokine receptor CCR5||CCR5 chemokine receptor||CC chemokine receptor 5||chemokine (C-C) receptor 5||C-C chemokine receptor 5||chemokine (C-C motif) receptor 5||CHEMOKINE, CC MOTIF, RECEPTOR 5||	1234	RefSeq	3	3	3p21.31	3p21	+	46386636	46392695	C-C chemokine receptor activity	G-protein coupled receptor protein signaling pathway	integral to membrane
CCR6	0.979	0.021	0.959	0.022	0.979	-0.732645	1235	NM_004367	Hs.46468	Chemokine (C-C motif) receptor 6	||GPR29||DRY-6||BN-1||STRL22||CKRL3||GPR-CY4||GPRCY4||CMKBR6||CKR-L3||CKR6||DCR2||CCR6||chemokine receptor-like 3||seven-transmembrane receptor, lymphocyte, 22||G protein-coupled receptor 29||chemokine (C-C) receptor 6||chemokine (C-C motif) receptor 6||CHEMOKINE, CC MOTIF, RECEPTOR 6||	1235	RefSeq	6	6	6q27	6q27	+	167506667	167523040	C-C chemokine receptor activity	G-protein coupled receptor protein signaling pathway	integral to plasma membrane
CCR7	0.965	0.006	0.984	0.011	1.019	-0.367682	1236	NM_001838	Hs.370036	Chemokine (C-C motif) receptor 7	||CDw197||EBI1||BLR2||CMKBR7||CCR7||MIP-3 beta receptor||EPSTEIN-BARR VIRUS-INDUCED GENE 1||CC chemokine receptor 7||chemokine (C-C) receptor 7||chemokine (C-C motif) receptor 7||CHEMOKINE, CC MOTIF, RECEPTOR 7||C-C chemokine receptor type 7||EBV-induced G protein-coupled receptor 1||lymphocyte-specific G protein-coupled peptide receptor||Epstein-Barr virus induced gene 1||Epstein-Barr virus indu…	1236	RefSeq	17	17	17q21.2	17q12-q21.2	-	35963549	35975250	C-C chemokine receptor activity	G-protein coupled receptor protein signaling pathway	integral to plasma membrane
CCR8	0.953	0.007	0.889	0	0.933	-1.15235	1237	NM_005201	Hs.113222	Chemokine (C-C motif) receptor 8	||CKRL1||TER1||CMKBR8||CKR-L1||CMKBRL2||GPR-CY6||CCR8||CHEMOKINE RECEPTOR-LIKE 1||CC-chemokine receptor chemr1||CC chemokine receptor 8||chemokine (C-C) receptor 8||chemokine (C-C) receptor-like 2||CHEMOKINE, CC MOTIF, RECEPTOR-LIKE 2||CHEMOKINE, CC MOTIF, RECEPTOR 8||chemokine (C-C motif) receptor 8||	1237	RefSeq	3	3	3p22.2	3p22	+	39346218	39351077	C-C chemokine receptor activity	G-protein coupled receptor protein signaling pathway	integral to plasma membrane
CCR9	1.238	0.008	1.176	0.011	0.949	-1.00637	10803	NM_006641	Hs.225946	Chemokine (C-C motif) receptor 9	||GPR-9-6||CCR9||chemokine (C-C motif) receptor 9||CHEMOKINE, CC MOTIF, RECEPTOR 9||	10803	RefSeq	3	3	3p21.31	3p21.3	+	45903054	45919670	C-C chemokine receptor activity	G-protein coupled receptor protein signaling pathway	integral to membrane
CCRL1	0.958	0.018	0.981	0.012	1.023	-0.331186	51554	NM_016557	Hs.310512	Chemokine (C-C motif) receptor-like 1	||CCRL1||PPR1, BOVINE, HOMOLOG OF||chemokine (C-C motif) receptor-like 1||CHEMOKINE, CC MOTIF, RECEPTOR-LIKE PROTEIN 1||	51554	RefSeq	3	3	3q22.1	3q22	+	133798791	133804080	C-C chemokine receptor activity	G-protein coupled receptor protein signaling pathway	integral to plasma membrane
CCRL2	1.036	0.008	1.036	0.001	0.999	-0.550163	9034	NM_003965	Hs.458436	Chemokine (C-C motif) receptor-like 2	||CCRL2||chemokine (C-C motif) receptor-like 2||CHEMOKINE, CC MOTIF, RECEPTOR-LIKE PROTEIN 2||	9034	RefSeq	3	3	3p21.31	3p21	+	46423753	46426017	C-C chemokine receptor activity	G-protein coupled receptor protein signaling pathway	integral to membrane
CD3E	1.204	0.009	1.122	0.016	0.932	-1.16148	916	NM_000733	Hs.3003	CD3E antigen, epsilon polypeptide (TiT3 complex)	||T3E||CD3E||CD3 ANTIGEN, EPSILON SUBUNIT||CD3E antigen, epsilon polypeptide (TiT3 complex)||TCRE IMMUNODEFICIENCY DUE TO DEFECT IN CD3-EPSILON||T-CELL ANTIGEN RECEPTOR COMPLEX, EPSILON SUBUNIT OF T3||	916	RefSeq	11	11	11q23.3	11q23	+	117680823	117692096	SH3 domain binding	G-protein coupled receptor protein signaling pathway	T cell receptor complex
CD97	1.121	0.027	1.047	0.004	0.934	-1.14323	976	NM_001784	Hs.466039	CD97 antigen	||||CD97||CD97 antigen||		RefSeq	19	19	19p13.12	19p13	+	14353265	14380533	G-protein coupled receptor activity	cell adhesion	integral to plasma membrane
CELSR1	1.223	0.024	1.131	0.024	0.924	-1.23447	9620	NM_014246	Hs.252387	Cadherin, EGF LAG seven-pass G-type receptor 1 (flamingo homolog, Drosophila)	||FMI2||CELSR1||FLAMINGO, DROSOPHILA, HOMOLOG OF, 2||CADHERIN EGF LAG SEVEN-PASS G-TYPE RECEPTOR 1||cadherin, EGF LAG seven-pass G-type receptor 1 (flamingo homolog, Drosophila)||	9620	RefSeq	22	22	22q13.31	22q13.3	-	45077249	45253586	G-protein coupled receptor activity	cell adhesion	integral to plasma membrane
CELSR2	1.134	0.046	1.089	0.013	0.96	-0.906002	1952	NM_001408	Hs.57652	Cadherin, EGF LAG seven-pass G-type receptor 2 (flamingo homolog, Drosophila)	||Flamingo1||CELSR2||EGFL2||KIAA0279||MEGF3||CDHF10||EGF-like-domain, multiple 2||flamingo (Drosophila) homolog||epidermal growth factor-like 2||multiple epidermal growth factor-like domains 3||cadherin EGF LAG seven-pass G-type receptor 2||cadherin, EGF LAG seven-pass G-type receptor 2 (flamingo homolog, Drosophila)||	1952	RefSeq	1	1	1p13.3	1p21	+	109504682	109530414	G-protein coupled receptor activity	cell adhesion	integral to membrane
CELSR3	0.939	0.026	0.895	0.015	0.953	-0.96987	1951	NM_001407	Hs.533070	Cadherin, EGF LAG seven-pass G-type receptor 3 (flamingo homolog, Drosophila)	||EGFL1||HFMI1||CDHF11||CELSR3||RESDA1||MEGF2||anchor protein||EGF-like-domain, multiple 1||multiple EGF-like domains 2||epidermal growth factor-like 1||FLAMINGO, DROSOPHILA, HOMOLOG OF, 1||MULTIPLE EPIDERMAL GROWTH FACTOR-LIKE DOMAINS 2||cadherin EGF LAG seven-pass G-type receptor 3, flamingo (Drosophila) homolog||cadherin, EGF LAG seven-pass G-type receptor 3 (flamingo homolog, Drosophila)||	1951	RefSeq	3	3	3p21.31	3p24.1-p21.2	-	48648900	48675352	G-protein coupled receptor activity	cell adhesion	integral to membrane
CHAF1B	0.962	0.008	0.938	0.02	0.975	-0.769141	8208	NM_005441	Hs.75238	Chromatin assembly factor 1, subunit B (p60)	||CHAF1B||CAF1P60||CAF1A||CHROMATIN ASSEMBLY FACTOR I, p60 SUBUNIT||CHROMATIN ASSEMBLY FACTOR I, SUBUNIT B||chromatin assembly factor 1, subunit B (p60)||	8208	RefSeq	21	21	21q22.12	21q22.13	+	36679558	36710994	chromatin binding	DNA repair	chromatin assembly complex
CHRM2	1.25	0.001	1.142	0.028	0.913	-1.33483	1129	NM_000739	Hs.527965	Cholinergic receptor, muscarinic 2	||CHRM2||HM2||FLJ43243||7TM receptor||muscarinic M2 receptor||M2 muscarinic acetylcholine receptor||ACETYLCHOLINE RECEPTOR, MUSCARINIC, 2||Cholinergic receptor, muscarinic 2||muscarinic acetylcholine receptor M2||CHOLINERGIC RECEPTOR, MUSCARINIC, 2||cholinergic receptor, muscarinic 2 isoform b||cholinergic receptor, muscarinic 2 isoform a||	1129	RefSeq	7	7	7q33	7q31-q35	+	136156867	136158268	muscarinic acetylcholine receptor activity	G-protein signaling, coupled to cAMP nucleotide second messenger	integral to plasma membrane
CHRM3	0.873	0.006	0.832	0.002	0.953	-0.96987	1131	NM_000740	Hs.7138	Cholinergic receptor, muscarinic 3	||CHRM3||HM3||m3 muscarinic receptor||muscarinic acetylcholine receptor M3||CHOLINERGIC RECEPTOR, MUSCARINIC, 3||ACETYLCHOLINE RECEPTOR, MUSCARINIC, 3||Cholinergic receptor, muscarinic 3||	1131	RefSeq	1	1	1q43	1q41-q44	+	236396792	236398565	muscarinic acetylcholine receptor activity	G-protein coupled receptor protein signaling pathway	integral to plasma membrane
CMKLR1	0.873	0.006	0.89	0.028	1.02	-0.358558	1240	NM_004072	Hs.506659	Chemokine-like receptor 1	||ChemR23||CMKLR1||Chemokine-like receptor 1||orphan G-protein coupled receptor, Dez||	1240	RefSeq	12	12	12q23.3	12q24.1	-	107187813	107235553	C5a anaphylatoxin receptor activity	G-protein coupled receptor protein signaling pathway	integral to membrane
CNR1	0.986	0.037	0.984	0.004	0.997	-0.568411	1268	NM_016083	Hs.75110	Cannabinoid receptor 1 (brain)	||CB1K5||CNR1||CANN6||CB1A||CB-R||CB1 RECEPTOR||Cannabinoid receptor 1 (brain)||central cannabinoid receptor isoform a||central cannabinoid receptor isoform b||	1268	RefSeq	6	6	6q15	6q14-q15	-	88906301	88911775	cannabinoid receptor activity	G-protein signaling, coupled to cyclic nucleotide second messenger	integral to plasma membrane
CNR2	0.911	0.024	0.948	0.013	1.04	-0.176076	1269	NM_001841	Hs.73037	Cannabinoid receptor 2 (macrophage)	||OTTHUMP00000044841||CX5||CNR2||CB2 RECEPTOR||Cannabinoid receptor 2 (macrophage)||	1269	RefSeq	1	1	1p36.11	1p36.11	-	23945765	23985123	cannabinoid receptor activity	G-protein signaling, coupled to cyclic nucleotide second messenger	integral to plasma membrane
CRHR1	0.958	0.027	0.977	0.015	1.02	-0.358558	1394	NM_004382	Hs.417628	Corticotropin releasing hormone receptor 1	||CRHR1f||CRF1||CRFR1||CRHR1||CRF-R||CORTICOTROPIN-RELEASING FACTOR RECEPTOR||seven transmembrane helix receptor||CORTICOTROPIN-RELEASING HORMONE RECEPTOR 1||Corticotropin releasing hormone receptor 1||	1394	RefSeq	17	17	17q21.31	17q12-q22	+	41217448	41268973	G-protein coupled receptor activity	G-protein coupled receptor protein signaling pathway	integral to plasma membrane
CRHR2	1.005	0	1.018	0.027	1.012	-0.43155	1395	NM_001883	Hs.546246	Corticotropin releasing hormone receptor 2	||CRFR2||CRHR2||CRF2 RECEPTOR||CORTICOTROPIN-RELEASING FACTOR RECEPTOR 2||CORTICOTROPIN-RELEASING HORMONE RECEPTOR 2||Corticotropin releasing hormone receptor 2||	1395	RefSeq	7	7	7p14.3	7p14.3	-	30465439	30495136	G-protein coupled receptor activity	G-protein coupled receptor protein signaling pathway	integral to plasma membrane
CRY1	1.053	0.009	1.073	0.014	1.018	-0.376806	1407	NM_004075	Hs.151573	Cryptochrome 1 (photolyase-like)	||CRY1||PHLL1||PHOTOLYASE 1||Cryptochrome 1 (photolyase-like)||	1407	RefSeq	12	12	12q23.3	12q23-q24.1	-	105887608	105989792	DNA binding	DNA repair	mitochondrion
CX3CR1	1.033	0.004	1.085	0.012	1.05	-0.0848357	1524	NM_001337	Hs.78913	Chemokine (C-X3-C motif) receptor 1	||CX3CR1||CCRL1||GPRV28||CMKDR1||CMKBRL1||GPR13||FRACTALKINE RECEPTOR CX3CR1||G PROTEIN-COUPLED RECEPTOR V28||chemokine (C-X3-C) receptor 1||chemokine (C-C) receptor-like 1||G protein-coupled receptor 13||CHEMOKINE, CX3C MOTIF, RECEPTOR 1||chemokine (C-X3-C motif) receptor 1||	1524	RefSeq	3	3	3p22.2	3p21	-	39279990	39296526	C-X-C chemokine receptor activity	G-protein coupled receptor protein signaling pathway	integral to plasma membrane
CXCL12	1.035	0.016	1.038	0.03	1.002	-0.522791	6387	NM_000609	Hs.522891	Chemokine (C-X-C motif) ligand 12 (stromal cell-derived factor 1)	||CXCL12||PBSF||SDF1||PRE-B CELL GROWTH-STIMULATING FACTOR||CHEMOKINE, CXC MOTIF, LIGAND 12||chemokine (C-X-C motif) ligand 12 (stromal cell-derived factor 1)||	6387	RefSeq	10	10	10q11.21	10q11.1	-	44185612	44200551	chemokine activity	G-protein coupled receptor protein signaling pathway	extracellular region
CXCL2	0.933	0.017	0.988	0.019	1.059	-0.00271906	2920	NM_002089	Hs.75765	Chemokine (C-X-C motif) ligand 2	||MIP2A||GROb||MGSA-b||MIP2-ALPHA||SCYB2||CXCL2||MIP-2a||CINC-2a||GRO2, FORMERLY||MGSA beta||GRO2 ONCOGENE, FORMERLY||GRO PROTEIN, BETA||MACROPHAGE INFLAMMATORY PROTEIN 2||melanoma growth stimulatory activity beta||CHEMOKINE, CXC MOTIF, LIGAND 2||chemokine (C-X-C motif) ligand 2||SMALL INDUCIBLE CYTOKINE SUBFAMILY B, MEMBER 2||	2920	RefSeq	4	4	4q13.3	4q21	-	75327790	75329927	chemokine activity	G-protein coupled receptor protein signaling pathway	extracellular space
CXCL3	0.941	0.019	1.023	0.014	1.086	0.243631	2921	NM_002090	Hs.89690	Chemokine (C-X-C motif) ligand 3	||MIP2B||CXCL3||CINC-2b||SCYB3||GROg||MIP-2b||GRO3, FORMERLY||MGSA gamma||MEMBER 3||GRO PROTEIN, GAMMA||GRO3 ONCOGENE, FORMERLY||MACROPHAGE INFLAMMATORY PROTEIN-2-BETA||CHEMOKINE, CXC MOTIF, LIGAND 3||melanoma growth stimulatory activity gamma||chemokine (C-X-C motif) ligand 3||SMALL INDUCIBLE CYTOKINE SUBFAMILY B||	2921	RefSeq	4	4	4q13.3	4q21	-	75267348	75269440	chemokine activity	G-protein coupled receptor protein signaling pathway	extracellular space
CXCL9	0.904	0.028	0.846	0.013	0.936	-1.12498	4283	NM_002416	Hs.77367	Chemokine (C-X-C motif) ligand 9	||SCYB9||CXCL9||MIG, FORMERLY||chemokine (C-X-C motif) ligand 9||CHEMOKINE, CXC MOTIF, LIGAND 9||MONOKINE INDUCED BY GAMMA INTERFERON, FORMERLY||SMALL INDUCIBLE CYTOKINE SUBFAMILY B, MEMBER 9||	4283	RefSeq	4	4	4q21.1	4q21	-	77279801	77285820	chemokine activity	G-protein coupled receptor protein signaling pathway	extracellular space
CXCR3	1.03	0.025	0.922	0.024	0.895	-1.49907	2833	NM_001504	Hs.198252	Chemokine (C-X-C motif) receptor 3	||MigR||Mig-R||CKR-L2||IP10-R||CMKAR3||CXCR3||CD183 ANTIGEN||Mig receptor||IP10 receptor||GPR9, FORMERLY||chemokine (C-X-C) receptor 3||chemokine (C-X-C motif) receptor 3||G PROTEIN-COUPLED RECEPTOR 9, FORMERLY||CHEMOKINE, CXC MOTIF, RECEPTOR 3||	2833	RefSeq	X	X	Xq13.1	Xq13	-	70618787	70621388	C-C chemokine receptor activity	G-protein coupled receptor protein signaling pathway	cytoplasm
CXCR4	1.051	0.037	0.945	0.026	0.899	-1.46257	7852	NM_003467	Hs.421986	Chemokine (C-X-C motif) receptor 4	||FUSIN||LAP3||HM89||LESTR||CXCR4||D2S201E||NPY3R||LIPOPOLYSACCHARIDE-ASSOCIATED PROTEIN 3||LPS-ASSOCIATED PROTEIN 3||SEVEN-TRANSMEMBRANE-SEGMENT RECEPTOR, SPLEEN||LEUKOCYTE-DERIVED SEVEN-TRANSMEMBRANE-DOMAIN RECEPTOR||NEUROPEPTIDE Y RECEPTOR Y3||chemokine (C-X-C motif) receptor 4||CHEMOKINE, CXC MOTIF, RECEPTOR 4||	7852	RefSeq	2	2	2q21.3	2q21	-	136705638	136709450	C-C chemokine receptor activity	G-protein coupled receptor protein signaling pathway	integral to membrane
CXCR6	1.055	0.006	0.926	0.014	0.877	-1.6633	10663	NM_006564	Hs.34526	Chemokine (C-X-C motif) receptor 6	||CXCR6||BONZO||CHEMOKINE (C-X-C) RECEPTOR 6||G PROTEIN-COUPLED RECEPTOR STRL33||chemokine (C-X-C motif) receptor 6||	10663	RefSeq	3	3	3p21.31	3p21	+	45959976	45964849	C-C chemokine receptor activity	G-protein coupled receptor protein signaling pathway	integral to plasma membrane
CYSLTR1	1.024	0.009	0.937	0.035	0.914	-1.32571	10800	NM_006639	Hs.201300	Cysteinyl leukotriene receptor 1	||CYSLT1R||CYSLTR1||Cysteinyl leukotriene receptor 1||	10800	RefSeq	X	X	Xq21.1	Xq13.2-21.1	-	77334275	77389232	leukotriene receptor activity	G-protein coupled receptor protein signaling pathway	integral to plasma membrane
CYSLTR2	1.104	0.013	1.023	0.031	0.926	-1.21622	57105	NM_020377	Hs.253706	Cysteinyl leukotriene receptor 2	||CYSLT2||CYSLTR2||Cysteinyl leukotriene receptor 2||	57105	RefSeq	13	13	13q14.2	13q14.12-q21.1	+	48178951	48181499	leukotriene receptor activity	G-protein coupled receptor protein signaling pathway	integral to membrane
DEFB4	0.909	0.044	0.993	0.014	1.092	0.298375	1673	NM_004942	Hs.105924	Defensin, beta 4	||DEFB-2||DEFB102||SAP1||HBD-2||DEFB4||DEFB2, FORMERLY||skin-antimicrobial peptide 1||defensin, beta 2||DEFENSIN, BETA, 4||Defensin, beta 4||defensin, beta 4 precursor||DEFENSIN, BETA, 2, FORMERLY||	1673	RefSeq	8	8	8p23.1	8p23.1-p22	+	7789608	7791647		G-protein coupled receptor protein signaling pathway	extracellular region
DRD1	1.09	0.03	1.063	0.006	0.975	-0.769141	1812	NM_000794	Hs.2624	Dopamine receptor D1	||DRD1||DADR||DRD1A||dopamine receptor D1||DOPAMINE RECEPTOR D1A||	1812	RefSeq	5	5	5q35.2	5q35.1	-	174800642	174803769	dopamine receptor activity	G-protein signaling, coupled to cyclic nucleotide second messenger	cell
DRD5	1.059	0.007	0.962	0.029	0.908	-1.38045	1816	NM_000798	Hs.380681	Dopamine receptor D5	||DRD1L2||DRD5||MGC10601||DBDR||dopamine receptor D1B||D1beta dopamine receptor||dopamine receptor D5||DRD1B DYSTONIA, PRIMARY CERVICAL||	1816	RefSeq	4	4	4p16.1	4p16.1	+	9459871	9461901	dopamine receptor activity	G-protein coupled receptor protein signaling pathway	integral to plasma membrane
EBI2	1.048	0.003	0.972	0.031	0.926	-1.21622	1880	NM_004951	Hs.784	Epstein-Barr virus induced gene 2 (lymphocyte-specific G protein-coupled receptor)	||EBI2||EPSTEIN-BARR VIRUS-INDUCED GENE 2||EBV-induced G protein-coupled receptor 2||Epstein-Barr virus induced gene 2 (lymphocyte-specific G protein-coupled receptor)||	1880	RefSeq	13	13	13q32.3	13q32.3	-	98744796	98746418	purinergic nucleotide receptor activity, G-protein coupled	G-protein coupled receptor protein signaling pathway	integral to plasma membrane
ECE2	1.019	0.036	0.896	0.011	0.879	-1.64505	9718	NM_014693	Hs.146161	Endothelin converting enzyme 2	||||ECE2||Endothelin converting enzyme 2||		RefSeq	3	3	3q27.1		+	185450218	185493520	S-adenosylmethionine-dependent methyltransferase activity	brain development	cytoplasmic vesicle membrane
EDG1	1.116	0.035	1.055	0.011	0.945	-1.04286	1901	NM_001400	Hs.154210	Endothelial differentiation, sphingolipid G-protein-coupled receptor, 1	||ECGF1||CHEDG1||S1P1||EDG1||S1PR1||D1S3362||EDG-1||S1P RECEPTOR 1||ENDOTHELIAL DIFFERENTIATION GENE 1||sphingosine 1-phosphate receptor EDG1||G protein-coupled sphingolipid receptor||endothelial differentiation, sphingolipid G-protein-coupled receptor, 1||	1901	RefSeq	1	1	1p21.2	1p21	+	101414596	101419094	lysosphingolipid and lysophosphatidic acid receptor activity	G-protein coupled receptor protein signaling pathway	integral to plasma membrane
EDG2	1.26	0.038	1.064	0	0.844	-1.96439	1902	NM_001401	Hs.126667	Endothelial differentiation, lysophosphatidic acid G-protein-coupled receptor, 2	||vzg-1||Gpcr26||LPAR1||EDG2||VZG1||rec.1.3||edg-2||Mrec1.3||LPA1||LPA RECEPTOR EDG2||LYSOPHOSPHATIDIC ACID RECEPTOR EDG2||ventricular zone gene 1||ENDOTHELIAL DIFFERENTIATION GENE 2||endothelial differentiation, lysophosphatidic acid G-protein-coupled receptor, 2||	1902	RefSeq	9	9	9q31.3	9q31.3	-	110715610	110879920	lysosphingolipid and lysophosphatidic acid receptor activity	G-protein coupled receptor protein signaling pathway	integral to plasma membrane
EDG3	1.161	0.019	1.091	0.023	0.939	-1.09761	1903	NM_005226	Hs.546252	Chromosome 9 open reading frame 47	||||C9orf47||Chromosome 9 open reading frame 47||		RefSeq	9	9	9q22.1	9q22.1	+	88835915	88849478
EDG4	1.234	0.054	1.126	0.006	0.912	-1.34396	9170	NM_004720	Hs.122575	Endothelial differentiation, lysophosphatidic acid G-protein-coupled receptor, 4	||EDG4||LPA RECEPTOR EDG4||ENDOTHELIAL DIFFERENTIATION GENE 4||LYSOPHOSPHATIDIC ACID RECEPTOR EDG4||endothelial differentiation, lysophosphatidic acid G-protein-coupled receptor, 4||	9170	RefSeq	19	19	19p13.11	19p12	-	19595476	19600017	lipid binding	G-protein coupled receptor protein signaling pathway	integral to plasma membrane
EDG5	1.093	0.026	1.033	0	0.945	-1.04286	9294	NM_004230	Hs.458474	Endothelial differentiation, sphingolipid G-protein-coupled receptor, 5	||EDG5||S1P2||S1P RECEPTOR 2||ENDOTHELIAL DIFFERENTIATION GENE 5||SPHINGOSINE 1-PHOSPHATE RECEPTOR EDG5||endothelial differentiation, sphingolipid G-protein-coupled receptor, 5||	9294	RefSeq	19	19	19p13.2	19p13.2	-	10195519	10202929	lipid binding	G-protein coupled receptor protein signaling pathway	integral to membrane
EDG6	1.014	0.034	0.933	0.004	0.919	-1.28009	8698	NM_003775	Hs.515061	Endothelial differentiation, G-protein-coupled receptor 6	||EDG6||S1P4||S1P RECEPTOR 4||ENDOTHELIAL DIFFERENTIATION GENE 6||endothelial differentiation, G-protein-coupled receptor 6||	8698	RefSeq	19	19	19p13.3	19p13.3	+	3129769	3131329	lipid binding	G-protein coupled receptor protein signaling pathway	integral to plasma membrane
EDG7	1.085	0.011	1.036	0.03	0.955	-0.951622	23566	NM_012152	Hs.527909	Endothelial differentiation, lysophosphatidic acid G-protein-coupled receptor, 7	||EDG7||LPA RECEPTOR EDG7||LPA3, MOUSE, HOMOLOG OF||ENDOTHELIAL DIFFERENTIATION GENE 7||LYSOPHOSPHATIDIC ACID RECEPTOR EDG7||endothelial differentiation, lysophosphatidic acid G-protein-coupled receptor, 7||	23566	RefSeq	1	1	1p22.3	1p22.3-p31.1	-	84991521	85043863	lipid binding	G-protein signaling, coupled to cyclic nucleotide second messenger	integral to plasma membrane
EDG8	1.146	0.044	1.008	0.013	0.879	-1.64505	53637	NM_030760	Hs.501561	Endothelial differentiation, sphingolipid G-protein-coupled receptor, 8	||EDG8||S1P5||S1P RECEPTOR 5||ENDOTHELIAL DIFFERENTIATION GENE 8||SPHINGOSINE 1-PHOSPHATE RECEPTOR EDG8||endothelial differentiation, sphingolipid G-protein-coupled receptor, 8||	53637	RefSeq	19	19	19p13.2	19p13.2	-	10484622	10489112	lysosphingolipid and lysophosphatidic acid receptor activity	G-protein coupled receptor protein signaling pathway	integral to membrane
EDNRA	1.07	0.001	1.022	0.033	0.955	-0.951622	1909	NM_001957	Hs.183713	Endothelin receptor type A	||EDNRA||ETA||ETRA||G protein-coupled receptor||endothelin receptor type A||ENDOTHELIN RECEPTOR, TYPE A||ENDOTHELIN RECEPTOR, ET1-SPECIFIC TYPE||	1909	RefSeq	4	4	4q31.22	4q31.22-q31.23	+	148759734	148823710	endothelin-A receptor activity	G-protein coupled receptor protein signaling pathway	integral to plasma membrane
EDNRB	1.056	0.034	1.031	0.033	0.976	-0.760017	1910	NM_000115	Hs.82002	Endothelin receptor type B	||ABCDS||HSCR2||EDNRB||ETRB||ETB||Hirschsprung disease 2||ENDOTHELIN RECEPTOR, TYPE B||endothelin receptor type B||ENDOTHELIN RECEPTOR, NONSELECTIVE TYPE||endothelin receptor type B isoform 1||endothelin receptor type B isoform 2||	1910	RefSeq	13	13	13q22.3	13q22	-	77367616	77447665	endothelin receptor activity	G-protein signaling, coupled to IP3 second messenger (phospholipase C activating)	integral to plasma membrane
ELOVL4	1.098	0.024	0.976	0.012	0.888	-1.56293	6785	NM_022726	Hs.101915	Elongation of very long chain fatty acids (FEN1/Elo2, SUR4/Elo3, yeast)-like 4	||ELOVL4||ELONGATION OF VERY LONG CHAIN FATTY ACIDS-LIKE 4||elongation of very long chain fatty acids (FEN1/Elo2, SUR4/Elo3, yeast)-like 4||	6785	RefSeq	6	6	6q14.1	6q14	-	80681248	80713941	G-protein coupled photoreceptor activity	fatty acid biosynthesis	endoplasmic reticulum
ELTD1	1.056	0.008	0.991	0.007	0.937	-1.11586	64123	XM_371262	Hs.132314	EGF, latrophilin and seven transmembrane domain containing 1	||ELTD1||EGF, latrophilin and seven transmembrane domain containing 1||	64123			1		1p33-p32				G-protein coupled receptor activity	neuropeptide signaling pathway	integral to membrane
EMR1	1.146	0.019	1.079	0.011	0.941	-1.07936	2015	NM_001974	Hs.2375	Egf-like module containing, mucin-like, hormone receptor-like 1	||TM7LN3||EMR1||EGF-LIKE MODULE-CONTAINING, MUCIN-LIKE HORMONE RECEPTOR 1||Egf-like module containing, mucin-like, hormone receptor-like 1||egf-like module containing, mucin-like, hormone receptor-like sequence 1||	2015	RefSeq	19	19	19p13.3	19p13.3	+	6838581	6891463	G-protein coupled receptor activity	cell adhesion	integral to plasma membrane
EMR3	1.103	0.054	1.009	0.012	0.914	-1.32571	84658	NM_032571	Hs.295626	Egf-like module containing, mucin-like, hormone receptor-like 3	||EMR3||EGF-LIKE MODULE-CONTAINING, MUCIN-LIKE HORMONE RECEPTOR 3||Egf-like module containing, mucin-like, hormone receptor-like 3||	84658	RefSeq	19	19	19p13.12	19p13.1	-	14591051	14646810	G-protein coupled receptor activity	neuropeptide signaling pathway	integral to membrane
GPR37L1	0.921	0.01	0.928	0.008	1.007	-0.477171	9283	NM_004767	Hs.132049	G-protein coupled receptor 37 like 1	||GPR37L1||G-protein coupled receptor 37 like 1||	9283	RefSeq	1	1	1q32.1	1q32.1	+	198823685	198830290	G-protein coupled receptor activity, unknown ligand	G-protein coupled receptor protein signaling pathway	integral to membrane
F2R	1.114	0.034	0.994	0.041	0.892	-1.52644	2149	NM_001992	Hs.482562	Coagulation factor II (thrombin) receptor	||PAR1||F2R||CF2R||HTR||thrombin receptor||protease-activated receptor 1||coagulation factor II receptor precursor||coagulation factor II (thrombin) receptor||	2149	RefSeq	5	5	5q13.3	5q13	+	76047546	76067054	receptor activity	G-protein coupled receptor protein signaling pathway	Golgi apparatus
F2RL1	1.154	0.014	1.002	0.022	0.868	-1.74542	2150	NM_005242	Hs.154299	Coagulation factor II (thrombin) receptor-like 1	||PAR2||GPR11||F2RL1||G protein-coupled receptor-11||protease-activated receptor 2||PROTEINASE-ACTIVATED RECEPTOR 2||G PROTEIN-COUPLED RECEPTOR 11||COAGULATION FACTOR II RECEPTOR-LIKE 1||coagulation factor II (thrombin) receptor-like 1||coagulation factor II (thrombin) receptor-like 1 precursor||	2150	RefSeq	5	5	5q13.3	5q13	+	76150609	76166895	receptor activity	G-protein coupled receptor protein signaling pathway	Golgi apparatus
F2RL2	0.998	0.068	0.937	0.036	0.939	-1.09761	2151	NM_004101	Hs.42502	Coagulation factor II (thrombin) receptor-like 2	||PAR3||F2RL2||protease-activated receptor 3||thrombin receptor-like 2||coagulation factor II (thrombin) receptor-like 2||coagulation factor II (thrombin) receptor-like 2 precursor||Coagulation factor II receptor-like 2 (protease-actovated receptor 3)||	2151	RefSeq	5	5	5q13.3	5q13	-	75947063	75954996	phosphoinositide phospholipase C activity	G-protein coupled receptor protein signaling pathway	integral to plasma membrane
F2RL3	1.017	0.033	0.913	0.027	0.898	-1.47169	9002	NM_003950	Hs.137574	Coagulation factor II (thrombin) receptor-like 3	||PAR4||F2RL3||THROMBIN RECEPTOR-LIKE 3||PROTEASE-ACTIVATED RECEPTOR 4||COAGULATION FACTOR II RECEPTOR-LIKE 3||coagulation factor II (thrombin) receptor-like 3||	9002	RefSeq	19	19	19p13.11	19p12	+	16860825	16870516	receptor activity	G-protein signaling, coupled to IP3 second messenger (phospholipase C activating)	integral to plasma membrane
FKSG79	1.14	0.021	1.075	0.004	0.942	-1.07024	84636	NM_032553	Hs.326713	G protein-coupled receptor 174	||GPR174||G protein-coupled receptor 174||	84636	RefSeq	X	X	Xq21.1	Xq21.1	+	78232613	78233871	purinergic nucleotide receptor activity, G-protein coupled	G-protein coupled receptor protein signaling pathway	integral to membrane
FKSG83	1.146	0.003	1.018	0.027	0.888	-1.56293	83954	NM_032030	Hs.326753	FKSG83	||FKSG83||	83954	RefSeq	6	6	6p22.1	6p22.1	+	27400556	27401721	pheromone receptor activity	G-protein coupled receptor protein signaling pathway	integral to membrane
FLJ10060	1.161	0.017	1.023	0.036	0.881	-1.6268	55065	NM_017986	Hs.110128	G protein-coupled receptor 172B	||PAR2||GPCR42||GPR172B||FLJ10060||PERV-A RECEPTOR 2||G PROTEIN-COUPLED RECEPTOR 42||G protein-coupled receptor 172B||PORCINE ENDOGENOUS RETROVIRUS, SUBGROUP A, RECEPTOR 2||	55065	RefSeq	17	17	17p13.2	17p13.2	-	4876706	4879445	receptor activity
FLJ10458	1.081	0.013	1.003	0.001	0.927	-1.2071	54475	NM_018096	Hs.85570	Notchless gene homolog (Drosophila)	||FLJ10458||NLE1||notchless homolog 1 (Drosophila)||Notchless gene homolog (Drosophila)||	54475	RefSeq	17	17	17q12	17q12	-	30482482	30493420	signal transducer activity	G-protein coupled receptor protein signaling pathway	heterotrimeric G-protein complex
FLJ11856	1.141	0.024	1.038	0.008	0.909	-1.37133	79581	NM_024531	Hs.6459	G protein-coupled receptor 172A	||PAR1||GPCR41||GPR172A||FLJ11856||PERV-A RECEPTOR 1||G PROTEIN-COUPLED RECEPTOR 41||G protein-coupled receptor 172A||PORCINE ENDOGENOUS RETROVIRUS, SUBGROUP A, RECEPTOR 1||	79581	RefSeq	8	8	8q24.3	8q24.3	+	145553032	145555754	receptor activity
ICF45	1.224	0.001	1.075	0.003	0.878	-1.65418	54974	NM_017872	Hs.353090	Interphase cyctoplasmic foci protein 45	||ICF45||Interphase cyctoplasmic foci protein 45||	54974	RefSeq	5	5	5q33.3	5q33.3	+	157091023	157100488
FLJ31393	1.158	0.025	1.05	0.02	0.906	-1.3987	219445	NM_153024					RefSeq	11		11q11		-	55502754	55510457
GPR155	0.931	0.005	0.925	0.04	0.992	-0.614032	151556	NM_152529	Hs.516604	G protein-coupled receptor 155	||GPR155||G protein-coupled receptor 155||	151556	RefSeq	2	2	2q31.1	2q31.1	-	175124852	175177315	DNA binding	intracellular signaling cascade	integral to membrane
FPR1	1.121	0.001	0.979	0.02	0.873	-1.6998	2357	NM_002029	Hs.753	Formyl peptide receptor 1	||FPR1||N-FORMYLPEPTIDE RECEPTOR||FMLP RECEPTOR||Formyl peptide receptor 1||	2357	RefSeq	19	19	19q13.41	19q13.4	-	56940838	56946962	N-formyl peptide receptor activity	G-protein coupled receptor protein signaling pathway	endosome
FPRL1	0.994	0.025	0.92	0.01	0.925	-1.22534	2358	NM_001462	Hs.99855	Formyl peptide receptor-like 1	||FPR2A||LXA4R||HM63||FMLPX||FPRH2||FPRH1||FPRL1||FMLP-R-II||ALXR||Formyl peptide receptor-like 1||FORMYL PEPTIDE RECEPTOR HOMOLOG 1||lipoxin A4 receptor (formyl peptide receptor related)||	2358	RefSeq	19	19	19q13.41	19q13.3-q13.4	+	56957829	56965582	N-formyl peptide receptor activity	G-protein coupled receptor protein signaling pathway	integral to membrane
FPRL2	1.055	0.056	0.965	0.032	0.914	-1.32571	2359	NM_002030	Hs.445466	Formyl peptide receptor-like 2	||FPRL2||FML2_HUMAN||FMLPY||FPRH1||RMLP-R-I||FPRH2||FMLP-RELATED RECEPTOR II||May be processed pseudogene||Formyl peptide receptor-like 2||FORMYL PEPTIDE RECEPTOR HOMOLOG 2||	2359	RefSeq	19	19	19q13.41	19q13.3-q13.4	+	56990222	57021146	N-formyl peptide receptor activity	G-protein coupled receptor protein signaling pathway	integral to membrane
FSHR	1.143	0	0.977	0.029	0.854	-1.87315	2492	NM_000145	Hs.1428	Follicle stimulating hormone receptor	||FSHRO||LGR1||FSHR||ODG1||FSH receptor||follitropin receptor||FOLLICLE-STIMULATING HORMONE RECEPTOR||ovarian dysgenesis 1||Follicle stimulating hormone receptor||follicle stimulating hormone receptor isoform 2 precursor||follicle stimulating hormone receptor isoform 1 precursor||	2492	RefSeq	2	2	2p16.3	2p21-p16	-	49101302	49293281	follicle stimulating hormone receptor activity	G-protein coupled receptor protein signaling pathway	integral to membrane
FY	1.108	0.038	1.003	0.005	0.905	-1.40783	2532	NM_002036	Hs.153381	Duffy blood group	||FY||OTTHUMP00000060081||GPD||CCBP1||Duffy blood group||DARC GLYCOPROTEIN D||BLOOD GROUP--DUFFY SYSTEM||DUFFY ANTIGEN RECEPTOR FOR CHEMOKINES||	2532	RefSeq	1	1	1q23.2	1q21-q22	+	155987582	155989361	chemokine receptor activity	G-protein coupled receptor protein signaling pathway	integral to plasma membrane
FZD1	1.147	0.009	1.034	0.02	0.901	-1.44432	8321	NM_003505	Hs.94234	Frizzled homolog 1 (Drosophila)	||FZD1||frizzled homolog 1 (Drosophila)||FRIZZLED, DROSOPHILA, HOMOLOG OF, 1||	8321	RefSeq	7	7	7q21.13	7q21	+	90538433	90542783	G-protein coupled receptor activity	G-protein coupled receptor protein signaling pathway	integral to membrane
FZD10	1.108	0.016	1.017	0.015	0.918	-1.28921	11211	NM_007197	Hs.31664	Frizzled homolog 10 (Drosophila)	||FZD10||frizzled homolog 10 (Drosophila)||FRIZZLED, DROSOPHILA, HOMOLOG OF, 10||	11211	RefSeq	12	12	12q24.33	12q24.33	+	129171911	129175164	G-protein coupled receptor activity	G-protein coupled receptor protein signaling pathway	integral to plasma membrane
FZD2	1.179	0.031	1.046	0.023	0.886	-1.58118	2535	NM_001466	Hs.142912	Frizzled homolog 2 (Drosophila)	||FZD2||frizzled 2||frizzled homolog 2 (Drosophila)||frizzled (Drosophila) homolog 2||FRIZZLED, DROSOPHILA, HOMOLOG OF, 2||	2535	RefSeq	17	17	17q21.31	17q21.1	+	39990450	39992433	G-protein coupled receptor activity	G-protein coupled receptor protein signaling pathway	integral to plasma membrane
FZD3	1.057	0.039	0.988	0.024	0.935	-1.1341	7976	NM_017412	Hs.40735	Frizzled homolog 3 (Drosophila)	||FZD3||frizzled homolog 3 (Drosophila)||FRIZZLED, DROSOPHILA, HOMOLOG OF, 3||	7976	RefSeq	8	8	8p21.1	8p21	+	28407691	28477878	G-protein coupled receptor activity	G-protein coupled receptor protein signaling pathway	integral to plasma membrane
FZD4	1.133	0.015	1.03	0.005	0.909	-1.37133	8322	NM_012193	Hs.19545	Frizzled homolog 4 (Drosophila)	||FZD4||frizzled homolog 4 (Drosophila)||FRIZZLED, DROSOPHILA, HOMOLOG OF, 4||	8322	RefSeq	11	11	11q14.2	11q14.2	-	86334369	86344081	G-protein coupled receptor activity	G-protein coupled receptor protein signaling pathway	integral to membrane
FZD5	1.067	0.015	0.94	0.005	0.881	-1.6268	7855	NM_003468	Hs.17631	Chromosome 2 open reading frame 31	||||C2orf31||Chromosome 2 open reading frame 31||		RefSeq	2	2	2q33.3	2q34	-	208456793	208459624
FZD6	1.187	0.027	1.085	0.013	0.913	-1.33483	8323	NM_003506	Hs.292464	Frizzled homolog 6 (Drosophila)	||FZD6||frizzled homolog 6 (Drosophila)||FRIZZLED, DROSOPHILA, HOMOLOG OF, 6||	8323	RefSeq	8	8	8q22.3	8q22.3-q23.1	+	104380275	104414268	G-protein coupled receptor activity	G-protein coupled receptor protein signaling pathway	integral to membrane
FZD7	1.083	0	0.948	0.01	0.875	-1.68155	8324	NM_003507	Hs.173859	Frizzled homolog 7 (Drosophila)	||FZE3||FZD7||frizzled homolog 7 (Drosophila)||FRIZZLED, DROSOPHILA, HOMOLOG OF, 7||	8324	RefSeq	2	2	2q33.1	2q33	+	202724815	202728666	G-protein coupled receptor activity	G-protein coupled receptor protein signaling pathway	integral to membrane
FZD8	1.135	0.001	1.028	0.034	0.905	-1.40783	8325	NM_031866	Hs.302634	Frizzled homolog 8 (Drosophila)	||FZD8||frizzled homolog 8 (Drosophila)||FRIZZLED, DROSOPHILA, HOMOLOG OF, 8||	8325	RefSeq	10	10	10p11.21	10p11.21	-	35967182	35970368	G-protein coupled receptor activity	G-protein coupled receptor protein signaling pathway	integral to membrane
FZD9	1.319	0.021	1.221	0.049	0.925	-1.22534	8326	NM_003508	Hs.534367	Frizzled homolog 9 (Drosophila)	||FZD3||FZD9||frizzled homolog 9 (Drosophila)||FRIZZLED, DROSOPHILA, HOMOLOG OF, 3||FRIZZLED, DROSOPHILA, HOMOLOG OF, 9||	8326	RefSeq	7	7	7q11.23	7q11.23	+	72292963	72295149	G-protein coupled receptor activity	G-protein coupled receptor protein signaling pathway	integral to membrane
GABBR1	1.349	0.006	1.243	0.008	0.921	-1.26184	2550	NM_001470	Hs.167017	Gamma-aminobutyric acid (GABA) B receptor, 1	||GABBR1-3||dJ271M21.1.1||dJ271M21.1.2||GABAB(1e)||hGB1a||GABBR1||GPRC3A||GABABR1||GABA-B RECEPTOR 1||GABAB, subunit 1c||seven transmembrane helix receptor||GAMMA-AMINOBUTYRIC ACID B RECEPTOR 1||gamma-aminobutyric acid (GABA) B receptor, 1||gamma-aminobutyric acid (GABA) B receptor 1 isoform d precursor||gamma-aminobutyric acid (GABA) B receptor 1 isoform b precursor||gamma-aminobutyric acid (GAB…	2550	RefSeq	6	6	6p22.1	6p21.31	-	29677984	29708839	GABA-B receptor activity	gamma-aminobutyric acid signaling pathway	integral to membrane
GALR2	1.199	0.029	1.126	0.001	0.939	-1.09761	8811	NM_003857	Hs.158351	Galanin receptor 2	||GALNR2||GALR2||Galanin receptor 2||	8811	RefSeq	17	17	17q25.1	17q25.3	+	71582486	71585168	galanin receptor activity	G-protein coupled receptor protein signaling pathway	integral to membrane
GCG	1.188	0.066	1.106	0.036	0.93	-1.17972	2641	NM_002054	Hs.516494	Glucagon	||GRPP||Glucagon||GCG||GLP2||GLP1||glicentin-related polypeptide||glucagon preproprotein||glucagon-like peptide 2||GCG GLUCAGON-LIKE PEPTIDE 1||	2641	RefSeq	2	2	2q24.2	2q36-q37	-	162824894	162834264	hormone activity	G-protein coupled receptor protein signaling pathway	extracellular region
GCGR	1.071	0.012	1.024	1.253	0.955	-0.951622	2642	NM_000160	Hs.208	Glucagon receptor	||GCGR||GGR||Glucagon receptor||	2642	RefSeq		17		17q25				G-protein coupled receptor activity	G-protein coupled receptor protein signaling pathway	integral to membrane
GHRHR	1.154	0.012	1.023	0.034	0.886	-1.58118	2692	NM_000823	Hs.767	Growth hormone releasing hormone receptor	||GRFR||GHRFR||GHRHR||GHRHRpsv||GRF receptor||growth hormone-releasing factor receptor||Growth hormone releasing hormone receptor||growth hormone-releasing hormone receptor form c||growth hormone-releasing hormone receptor form a||growth hormone-releasing hormone receptor form b||growth hormone releasing hormone receptor isoform a precursor||growth hormone releasing hormone receptor isoform b pre…	2692	RefSeq	7	7	7p14.3	7p14	+	30776875	30792381	G-protein coupled receptor activity	G-protein coupled receptor protein signaling pathway	integral to membrane
GHSR	1.229	0.017	1.061	0.001	0.863	-1.79104	2693	NM_004122	Hs.248115	Growth hormone secretagogue receptor	||GHSR||ghrelin receptor||Growth hormone secretagogue receptor||growth hormone secretagogue receptor isoform 1a||growth hormone secretagogue receptor isoform 1b||	2693	RefSeq	3	3	3q26.31	3q26.31	-	173648035	173648905	growth hormone-releasing hormone receptor activity	G-protein coupled receptor protein signaling pathway	integral to membrane
GIPR	0.958	0.021	0.898	0.013	0.937	-1.11586	2696	NM_000164	Hs.251412	Gastric inhibitory polypeptide receptor	||GIPR||Gastric inhibitory polypeptide receptor||INSULINOTROPIC POLYPEPTIDE RECEPTOR, GLUCOSE-DEPENDENT||	2696	RefSeq	19	19	19q13.32	19q13.3	+	50863341	50877557	G-protein coupled receptor activity	G-protein coupled receptor protein signaling pathway	integral to membrane
GIT1	1.134	0.035	1.038	0.022	0.915	-1.31659	28964	NM_014030	Hs.514051	G protein-coupled receptor kinase interactor 1	||GIT1||GRK-INTERACTING PROTEIN 1||G protein-coupled receptor kinase interactor 1||G PROTEIN-COUPLED RECEPTOR KINASE-INTERACTING PROTEIN 1||	28964	RefSeq	17	17	17q11.2	17p11.2	-	24924619	24940735	GTPase activator activity	regulation of G-protein coupled receptor protein signaling pathway
GIT2	1.156	0.01	1.071	0.006	0.926	-1.21622	9815	NM_014776	Hs.434996	G protein-coupled receptor kinase interactor 2	||KIAA0148||CAT2||GIT2||GRK-INTERACTING PROTEIN 2||COOL-INTERACTING TYROSINE-PHOSPHORYLATED PROTEIN 2||G PROTEIN-COUPLED RECEPTOR KINASE-INTERACTING PROTEIN 2||G protein-coupled receptor kinase interactor 2||	9815	RefSeq	12	12	12q24.11	12q24.1	-	108830328	108896820	GTPase activator activity	regulation of G-protein coupled receptor protein signaling pathway
GLP1R	1.16	0.027	1.069	0.017	0.921	-1.26184	2740	NM_002062	Hs.389103	Glucagon-like peptide 1 receptor	||GLP1R||GLP1 RECEPTOR||Glucagon-like peptide 1 receptor||	2740	RefSeq	6	6	6p21.2	6p21	+	39124594	39163497	G-protein coupled receptor activity	G-protein coupled receptor protein signaling pathway	integral to membrane
GLP2R	1.151	0.016	0.997	0.032	0.865	-1.77279	9340	NM_004246	Hs.248202	Glucagon-like peptide 2 receptor	||GLP2R||Glucagon-like peptide 2 receptor||	9340	RefSeq	17	17	17p13.1	17p13.3	+	9670105	9733747	G-protein coupled receptor activity	G-protein coupled receptor protein signaling pathway	integral to membrane
GNA13	1.165	0.034	1.066	0.006	0.914	-1.32571	10672	NM_006572	Hs.515018	Guanine nucleotide binding protein (G protein), alpha 13	||GNA13||GUANINE NUCLEOTIDE-BINDING PROTEIN, ALPHA-13||guanine nucleotide binding protein (G protein), alpha 13||	10672	RefSeq	17	17	17q24.1	17q24.3	-	60437295	60483216	GTP binding	G-protein coupled receptor protein signaling pathway	membrane
GNA14	1.237	0.015	1.131	0.027	0.914	-1.32571	9630	NM_004297	Hs.546329	Guanine nucleotide binding protein (G protein), alpha 14	||GNA14||GUANINE NUCLEOTIDE-BINDING PROTEIN, ALPHA-14||guanine nucleotide binding protein (G protein), alpha 14||	9630	RefSeq	9	9	9q21.2	9q21	-	77268102	77492777	GTP binding	G-protein coupled receptor protein signaling pathway	heterotrimeric G-protein complex
GNA15	1.001	0.029	1.028	0.045	1.027	-0.294689	2769	NM_002068	Hs.73797	Guanine nucleotide binding protein (G protein), alpha 15 (Gq class)	||GNA15||GNA16, FORMERLY||GUANINE NUCLEOTIDE-BINDING PROTEIN, ALPHA-15||guanine nucleotide binding protein (G protein), alpha 15 (Gq class)||	2769	RefSeq	19	19	19p13.3	19p13.3	+	3087229	3114741	GTP binding	G-protein coupled receptor protein signaling pathway	heterotrimeric G-protein complex
GNAI1	1.085	0.005	0.985	0.008	0.907	-1.38958	2770	NM_002069	Hs.134587	Guanine nucleotide binding protein (G protein), alpha inhibiting activity polypeptide 1	||GNAI1||INHIBITORY G PROTEIN||Gi1 protein alpha subunit||G PROTEIN, ALPHA-INHIBITING 1||ADENYLATE CYCLASE INHIBITORY PROTEIN||GUANINE NUCLEOTIDE-BINDING PROTEIN, ALPHA-INHIBITING ACTIVITY POLYPEPTIDE 1||guanine nucleotide binding protein (G protein), alpha inhibiting activity polypeptide 1||	2770	RefSeq	7	7	7q21.11	7q21	+	79408790	79493376	GTP binding	G-protein coupled receptor protein signaling pathway
GNAI3	1.217	0.071	1.01	0.018	0.83	-2.09213	2773	NM_006496	Hs.73799	Guanine nucleotide binding protein (G protein), alpha inhibiting activity polypeptide 3	||87U6||GNAI3||G PROTEIN, ALPHA-INHIBITING 3||GUANINE NUCLEOTIDE-BINDING PROTEIN, ALPHA-INHIBITING ACTIVITY POLYPEPTIDE 3||guanine nucleotide binding protein (G protein), alpha inhibiting activity polypeptide 3||	2773	RefSeq	1	1	1p13.3	1p13	+	109803342	109849017	GTP binding	G-protein coupled receptor protein signaling pathway
GNAO1	1.062	0.002	0.991	0.027	0.933	-1.15235	2775	NM_020988	Hs.241431	Guanine nucleotide binding protein (G protein), alpha activating activity polypeptide O	||||GNAO1||Guanine nucleotide binding protein (G protein), alpha activating activity polypeptide O||		RefSeq	16	16	16q12.2	16q13	+	54783648	54948651	GTP binding	G-protein coupled receptor protein signaling pathway
GNAQ	0.91	0.013	0.827	0.006	0.908	-1.38045	2776	NM_002072	Hs.269782	Guanine nucleotide binding protein (G protein), q polypeptide	||GNAQ||G-ALPHA-q||GAQ||GUANINE NUCLEOTIDE-BINDING PROTEIN, Q POLYPEPTIDE||G PROTEIN, ALPHA SUBUNIT, Gq CLASS||guanine nucleotide binding protein (G protein), q polypeptide||	2776	RefSeq	9	9	9q21.2	9q21	-	77564746	77875746	GTP binding	G-protein coupled receptor protein signaling pathway	cytoplasm
GNAS	1.016	0.011	0.972	0.029	0.956	-0.942498	2778	NM_000516	Hs.125898	GNAS complex locus	||C20orf45||XLAS||XL-ALPHA-S||G-s-alpha||GSA||PHP1A||GNAS||PHP1B||dJ309F20.1.1||AHO||ALEX||NESP55||GSP||GNASXL||POH||XLalphas||GNAS1||XL2||dJ806M20.3.3||GPSA||GNAS complex locus||Gs, ALPHA SUBUNIT||STIMULATORY G PROTEIN||neuroendocrine secretory protein 55||neuroendocrine-specific Golgi protein p55||guanine nucleotide regulatory protein||adenylate cyclase-stimulating G alpha protein||ADENYLATE CY…	2778	RefSeq	20	20	20q13.32	20q13.2-q13.3	+	56900129	56919640	GTP binding	G-protein coupled receptor protein signaling pathway	extracellular region
GNAT1	0.865	0.049	0.828	0.01	0.956	-0.942498	2779	NM_000172	Hs.517978	Guanine nucleotide binding protein (G protein), alpha transducing activity polypeptide 1	||GNATR||GBT1||GNAT1||transducin alpha-1 chain||TRANSDUCIN, ROD-SPECIFIC, ALPHA POLYPEPTIDE||G PROTEIN, ALPHA-TRANSDUCING 1||guanine nucleotide-binding protein G(T), alpha-1 subunit||GUANINE NUCLEOTIDE-BINDING PROTEIN, ALPHA-TRANSDUCING ACTIVITY POLYPEPTIDE 1||guanine nucleotide binding protein, alpha transducing activity polypeptide 1||guanine nucleotide binding protein (G protein), alpha transd…	2779	RefSeq	3	3	3p21.31	3p21	+	50204046	50208953	GTP binding	G-protein coupled receptor protein signaling pathway
GNAT2	1.062	0.049	0.996	0.019	0.938	-1.10673	2780	NM_005272	Hs.36973	Guanine nucleotide binding protein (G protein), alpha transducing activity polypeptide 2	||ACHM4||GNAT2||GNATC||cone-type transducin alpha subunit||G PROTEIN, ALPHA-TRANSDUCING 2||TRANSDUCIN, CONE-SPECIFIC, ALPHA POLYPEPTIDE ACHROMATOPSIA 4||GUANINE NUCLEOTIDE-BINDING PROTEIN, ALPHA-TRANSDUCING ACTIVITY POLYPEPTIDE 2||guanine nucleotide binding protein, alpha transducing activity polypeptide 2||guanine nucleotide binding protein (G protein), alpha transducing activity polypeptide 2||	2780	RefSeq	1	1	1p13.3	1p13.1	-	109857755	109867747	G-protein coupled photoreceptor activity	G-protein coupled receptor protein signaling pathway	heterotrimeric G-protein complex
GNAZ	1.049	0.043	0.92	0.01	0.877	-1.6633	2781	NM_002073	Hs.526920	Guanine nucleotide binding protein (G protein), alpha z polypeptide	||GNAZ||transducin alpha||GUANINE NUCLEOTIDE-BINDING PROTEIN, ALPHA Z POLYPEPTIDE||guanine nucleotide binding protein, alpha z polypeptide||guanine nucleotide binding protein (G protein), alpha z polypeptide||	2781	RefSeq	22	22	22q11.22	22q11.22	+	21737222	21791775	GTP binding	G-protein coupled receptor protein signaling pathway	endoplasmic reticulum
GNB1	1.032	0.017	0.9	0.021	0.872	-1.70892	2782	NM_002074	Hs.430425	Guanine nucleotide binding protein (G protein), beta polypeptide 1	||GNB1||OTTHUMP00000063508||transducin beta chain 1||beta subunit, signal-transducing proteins GS/GI||guanine nucleotide-binding protein, beta-1 subunit||guanine nucleotide-binding protein G(I)/G(S)/G(T) beta subunit 1||guanine nucleotide binding protein (G protein), beta polypeptide 1||	2782	RefSeq	1	1	1p36.33	1p36.33	-	1748891	1854657	signal transducer activity	G-protein coupled receptor protein signaling pathway	heterotrimeric G-protein complex
GNB3	0.91	0.025	0.864	0.032	0.949	-1.00637	2784	NM_002075	Hs.534315	Guanine nucleotide binding protein (G protein), beta polypeptide 3	||GNB3||hypertension associated protein||transducin beta chain 3||GTP-binding regulatory protein beta-3 chain||guanine nucleotide-binding protein, beta-3 subunit||guanine nucleotide-binding protein G(I)/G(S)/G(T) beta subunit 3||guanine nucleotide binding protein (G protein), beta polypeptide 3||	2784	RefSeq	12	12	12p13.31	12p13	+	6819635	6826818	GTPase activity	G-protein coupled receptor protein signaling pathway	heterotrimeric G-protein complex
GNB4	0.939	0.007	0.933	0.031	0.994	-0.595784	59345	NM_021629	Hs.270543	Guanine nucleotide binding protein (G protein), beta polypeptide 4	||GNB4||guanine nucleotide binding protein (G protein), beta polypeptide 4||	59345	RefSeq	3	3	3q26.32	3q26.32	-	180599703	180652073	signal transducer activity	G-protein coupled receptor protein signaling pathway	heterotrimeric G-protein complex
GNG11	0.88	0.036	0.877	0.022	0.996	-0.577535	2791	NM_004126	Hs.83381	Guanine nucleotide binding protein (G protein), gamma 11	||GNG11||GUANINE NUCLEOTIDE-BINDING PROTEIN, GAMMA-11||guanine nucleotide binding protein 11||guanine nucleotide binding protein gamma 11||guanine nucleotide binding protein (G protein), gamma 11||	2791	RefSeq	7	7	7q21.3	7q31-q32	+	93195749	93200475	signal transducer activity	G-protein coupled receptor protein signaling pathway	heterotrimeric G-protein complex
GNG12	0.893	0	0.875	0.003	0.979	-0.732645	55970	NM_018841	Hs.431101	Guanine nucleotide binding protein (G protein), gamma 12	||GNG12||guanine nucleotide binding protein (G protein), gamma 12||	55970	RefSeq	1	1	1p31.2	1p31.2	-	67882044	68011157	signal transducer activity	G-protein coupled receptor protein signaling pathway	heterotrimeric G-protein complex
GNG3	0.875	0.043	0.967	0.029	1.105	0.416988	2785	NM_012202	Hs.179915	Guanine nucleotide binding protein (G protein), gamma 3	||GNG3||NBP gamma-3||GUANINE NUCLEOTIDE-BINDING PROTEIN, GAMMA-3||guanine nucleotide-binding protein gamma-3 subunit||guanine nucleotide binding protein (G protein), gamma 3||	2785	RefSeq	11	11	11q12.3	11p11	+	62231708	62233246	signal transducer activity	G-protein coupled receptor protein signaling pathway	heterotrimeric G-protein complex
GNG4	0.625	0.061	0.88	0.012	1.408	3.18158	2786	NM_004485	Hs.159711	Guanine nucleotide binding protein (G protein), gamma 4	||||GNG4||Guanine nucleotide binding protein (G protein), gamma 4||		RefSeq	1	1	1q42.3	1q42.3	-	232040173	232140095	signal transducer activity	regulation of G-protein coupled receptor protein signaling pathway	heterotrimeric G-protein complex
GNG5	0.968	0.028	1.107	0.007	1.143	0.763703	2787	NM_005274	Hs.513557	Guanine nucleotide binding protein (G protein), gamma 5	||GNG5||GUANINE NUCLEOTIDE-BINDING PROTEIN, GAMMA-5||G PROTEIN GAMMA-5 SUBUNIT||guanine nucleotide binding protein (G protein), gamma 5||	2787	RefSeq	1	1	1p22.3	1p22	-	84676112	84684264	signal transducer activity	G-protein coupled receptor protein signaling pathway	heterotrimeric G-protein complex
GNG7	1.026	0.081	1.079	0.019	1.051	-0.0757116	2788	NM_052847	Hs.515544	Guanine nucleotide binding protein (G protein), gamma 7	||FLJ00058||GNG7||GUANINE NUCLEOTIDE-BINDING PROTEIN, GAMMA-7||guanine nucleotide binding protein (G protein), gamma 7||	2788	RefSeq	19	19	19p13.3	19p13.3	-	2462217	2653663	signal transducer activity	regulation of G-protein coupled receptor protein signaling pathway	heterotrimeric G-protein complex
GNRHR	0.937	0.059	1.075	0.005	1.147	0.800199	2798	NM_000406	Hs.407587	Gonadotropin-releasing hormone receptor	||GNRHR1||LHRHR||LRHR||GRHR||GNRHR||luliberin receptor||Gonadotropin-releasing hormone receptor||leutinizing-releasing hormone receptor||type I GnRH receptor||LUTEINIZING HORMONE-RELEASING HORMONE RECEPTOR||leutinizing hormone releasing horomone receptor||gonadotropin-releasing hormone receptor isoform 1||gonadotropin-releasing hormone receptor isoform 2||gonadotropin-releasing hormone (type 1) r…	2798	RefSeq	4	4	4q13.2	4q21.2	-	68434963	68450570	gonadotropin-releasing hormone receptor activity	G-protein coupled receptor protein signaling pathway	integral to membrane
GNRHR2	1.14	0.051	1.233	0.012	1.081	0.19801	114814	NM_057163	Hs.356873	Gonadotropin-releasing hormone (type 2) receptor 2	||GNRHR2||Gonadotropin-releasing hormone (type 2) receptor 2||	114814	RefSeq	1	1	1q21.1	1q12	-	142998278	143005120	gonadotropin-releasing hormone receptor activity	G-protein coupled receptor protein signaling pathway	integral to membrane
GPBAR1	1.059	0.058	1.183	0.015	1.117	0.526477	151306	NM_170699	Hs.160954	G protein-coupled bile acid receptor 1	||GPBAR1||G protein-coupled bile acid receptor 1||	151306	RefSeq	2	2	2q35	2q35	+	218951257	218954087	receptor activity	G-protein coupled receptor protein signaling pathway	integral to membrane
GPR119	0.898	0.068	1.053	0.003	1.172	1.0283	139760	NM_178471	Hs.496762	G protein-coupled receptor 119	||GPR119||GPCR2||G PROTEIN-COUPLED RECEPTOR 2||G protein-coupled receptor 119||	139760	RefSeq	X	X	Xq25	Xq25	-	129243948	129244956	receptor activity	G-protein coupled receptor protein signaling pathway	integral to membrane
GPR	0.772	0.052	1.016	0.032	1.316	2.34217	11245	NM_007223	Hs.37196	Putative G protein coupled receptor	||GPR||putative G protein coupled receptor||	11245	RefSeq	15	15	15q14	15q14-q15.1	-	37880222	38000385	receptor activity	G-protein coupled receptor protein signaling pathway	integral to plasma membrane
GPR1	0.893	0.03	1.068	0.004	1.195	1.23815	2825	NM_005279	Hs.184907	G protein-coupled receptor 1	||GPR1||G protein-coupled receptor 1||	2825	RefSeq	2	2	2q33.3	2q33.3	-	206865546	206903651	G-protein coupled receptor activity, unknown ligand	G-protein coupled receptor protein signaling pathway	integral to membrane
GPR10	0.806	0.04	0.927	0.031	1.15	0.827571	2834	NM_004248	Hs.248119	G protein-coupled receptor 10	||PrRPR||GR3||GPR10||prolactin-releasing hormone receptor||prolactin releasing peptide receptor||G protein-coupled receptor 10||	2834	RefSeq	10	10	10q26.11	10q26.13	-	120343633	120344746	neuropeptide Y receptor activity	G-protein coupled receptor protein signaling pathway	integral to plasma membrane
GPR100	0.907	0.035	0.991	0.006	1.091	0.289251	339403	NM_181885	Hs.449914	Relaxin 3 receptor 2	||GPR100||RLN3R2||G PROTEIN-COUPLED RECEPTOR 100||Relaxin 3 receptor 2||	339403	RefSeq	1	1	1q22	1q22	+	152724573	152725698	angiotensin type II receptor activity	G-protein coupled receptor protein signaling pathway	integral to membrane
GPR101	0.966	0.039	1.022	0.009	1.057	-0.0209672	83550	NM_054021	Hs.350569	G protein-coupled receptor 101	||GPR101||G protein-coupled receptor 101||	83550	RefSeq	X	X	Xq26.3	Xq25-27.1	-	135837826	135839353	receptor activity	G-protein coupled receptor protein signaling pathway	integral to membrane
TRAR5	0.591	0.028	0.791	0.014	1.337	2.53377	83551	NM_053278	Hs.350571	Trace amine associated receptor 8	||GPR102||TA5||TAAR8||TRAR5||TRAR5, FORMERLY||G PROTEIN-COUPLED RECEPTOR 102||TRACE AMINE-ASSOCIATED RECEPTOR 8||Trace amine associated receptor 8||TRACE AMINE RECEPTOR 5, FORMERLY||	83551	RefSeq	6	6	6q23.2	6q23.2	+	132915524	132916553	receptor activity	G-protein coupled receptor protein signaling pathway	integral to membrane
GPR105	0.924	0.035	0.987	0.048	1.068	0.0793976	9934	NM_014879	Hs.2465	Purinergic receptor P2Y, G-protein coupled, 14	||P2RY14||purinergic receptor P2Y, G-protein coupled, 14||	9934	RefSeq	3	3	3q25.1	3q21-q25	-	152412604	152478852	UDP-activated nucleotide receptor activity	G-protein coupled receptor protein signaling pathway	integral to membrane
GPR110	0.731	0.041	0.87	0.009	1.19	1.19253	266977	NM_153840	Hs.256897	G protein-coupled receptor 110	||GPR110||G protein-coupled receptor 110||	266977	RefSeq	6	6	6p12.3	6p12.3	-	47075917	47094194	G-protein coupled receptor activity	neuropeptide signaling pathway	integral to membrane
GPR111	0.886	0.042	1.014	0.018	1.144	0.772827	222611	NM_153839	Hs.381370	G protein-coupled receptor 111	||GPR111||G protein-coupled receptor 111||	222611	RefSeq	6	6	6p12.3	6p12.3	+	47732181	47758379	G-protein coupled receptor activity	neuropeptide signaling pathway	integral to membrane
GPR112	0.829	0.063	0.956	0.014	1.153	0.854943	139378	NM_153834	Hs.381354	G protein-coupled receptor 112	||GPR112||G protein-coupled receptor 112||	139378	RefSeq	X	X	Xq26.3	Xq26.3	+	135130575	135244733	G-protein coupled receptor activity	neuropeptide signaling pathway	integral to membrane
GPR113	0.956	0.058	1.086	0.026	1.136	0.699834	165082	NM_153835	Hs.515850	G protein-coupled receptor 113	||GPR113||G protein-coupled receptor 113||	165082	RefSeq	2	2	2p23.3	2p23.3	-	26444464	26453568	G-protein coupled receptor activity	neuropeptide signaling pathway	integral to membrane
GPR115	0.703	0.065	0.899	0	1.278	1.99545	221393	NM_153838	Hs.150131	G protein-coupled receptor 115	||GPR115||G protein-coupled receptor 115||	221393	RefSeq	6	6	6p12.3	6p12.3	+	47761558	47794135	G-protein coupled receptor activity	neuropeptide signaling pathway	integral to membrane
GPR116	0.848	0.023	0.937	0.022	1.104	0.407864	221395	NM_015234	Hs.362806	G protein-coupled receptor 116	||GPR116||G protein-coupled receptor 116||	221395	RefSeq	6	6	6p12.3	6p12.3	-	46928297	46990825	G-protein coupled receptor activity	neuropeptide signaling pathway	integral to membrane
GPR119	0.77	0.011	0.909	0.003	1.18	1.10129	139760	NM_178471	Hs.496762	G protein-coupled receptor 119	||GPR119||GPCR2||G PROTEIN-COUPLED RECEPTOR 2||G protein-coupled receptor 119||	139760	RefSeq	X	X	Xq25	Xq25	-	129243948	129244956	receptor activity	G-protein coupled receptor protein signaling pathway	integral to membrane
GPR12	0.788	0.017	0.919	0	1.166	0.973556	2835	NM_005288	Hs.123034	G protein-coupled receptor 12	||||GPR12||G protein-coupled receptor 12||		RefSeq	13	13	13q12.13	13q12	-	26230959	26231964	G-protein coupled receptor activity, unknown ligand	G-protein coupled receptor protein signaling pathway	integral to plasma membrane
GPR123	1.066	0.002	1.098	0.015	1.029	-0.276441	84435	NM_032422	Hs.435183	G protein-coupled receptor 123	||GPR123||G protein-coupled receptor 123||	84435	RefSeq	10	10	10q26.3	10q26	+	134773313	134831894	G-protein coupled receptor activity	G-protein coupled receptor protein signaling pathway	integral to membrane
GPR124	0.87	0.04	1.02	0.008	1.171	1.01918	25960	NM_032777	Hs.17270	G protein-coupled receptor 124	||TEM5||GPR124||G protein-coupled receptor 124||TUMOR ENDOTHELIAL MARKER 5||	25960	RefSeq	8	8	8p12	8p12	+	37773931	37820650	G-protein coupled receptor activity	neuropeptide signaling pathway	integral to membrane
GPR126	0.781	0.004	0.912	0.005	1.167	0.98268	57211	NM_020455	Hs.318894	G protein-coupled receptor 126	||GPR126||G protein-coupled receptor 126||	57211	RefSeq	6	6	6q24.1	6q24.1	+	142664861	142806785	G-protein coupled receptor activity	neuropeptide signaling pathway	integral to membrane
GPR128	1.005	0.023	1.048	0.025	1.042	-0.157828	84873	NM_032787	Hs.334511	G protein-coupled receptor 128	||GPR128||G protein-coupled receptor 128||	84873	RefSeq	3	3	3q12.2	3q12.2	+	101811134	101896955	G-protein coupled receptor activity	neuropeptide signaling pathway	integral to membrane
GPR132	0.885	0.05	1.007	0.004	1.138	0.718082	29933	NM_013345	Hs.532504	G protein-coupled receptor 132	||GPR132||G2A||G2 ACCUMULATION PROTEIN||G protein-coupled receptor 132||	29933	RefSeq	14	14	14q32.33	14q32.3	-	104586782	104602799	receptor activity	G-protein coupled receptor protein signaling pathway	integral to membrane
OPN5	0.953	0.033	1.035	0.01	1.085	0.234507	221391	NM_181744	Hs.213717	Opsin 5	||OPN5||GPR136||PGR12||NEUROPSIN||Opsin 5||G PROTEIN-COUPLED RECEPTOR 136||	221391	RefSeq	6	6	6p12.3	6p12.3	+	47857756	47900394	receptor activity	G-protein coupled receptor protein signaling pathway	integral to membrane
GPR14	0.727	0.016	0.823	0.015	1.132	0.663338	2837	NM_018949	Hs.192720	Urotensin 2 receptor	||UTR2||UTS2R||GPR14||UROTENSIN RECEPTOR||UROTENSIN II RECEPTOR||Urotensin 2 receptor||G protein-coupled receptor 14||	2837	RefSeq	17	17	17q25.3	17q25.3	+	77925489	77926659	receptor activity	G-protein coupled receptor protein signaling pathway	integral to membrane
GPR141	0.894	0.004	0.928	0.015	1.037	-0.203449	353345	NM_181791	Hs.512231	G protein-coupled receptor 141	||PGR13||GPR141||G protein-coupled receptor 141||	353345	RefSeq	7	7	7p14.1	7p14.1	+	37553235	37554153	purinergic nucleotide receptor activity, G-protein coupled	G-protein coupled receptor protein signaling pathway	integral to membrane
GPR143	1.056	0.001	0.987	0.011	0.935	-1.1341	4935	NM_000273	Hs.74124	G protein-coupled receptor 143	||GPR143||OA1 GENE||G protein-coupled receptor 143||ALBINISM, OCULAR, TYPE I||NETTLESHIP-FALLS TYPE OCULAR ALBINISM OCULAR ALBINISM 1 GENE||	4935	RefSeq	X	X	Xp22.2	Xp22.3	-	9503189	9543653	G-protein coupled receptor activity	G-protein coupled receptor protein signaling pathway	cytoplasm
GPR145	1.08	0.027	1.121	0.004	1.037	-0.203449	84539	NM_032503	Hs.549214	G protein-coupled receptor 145	||MCHR2||SLT||MCH2R||GPR145||G protein-coupled receptor 145||MELANIN-CONCENTRATING HORMONE RECEPTOR 2||	84539	RefSeq	6	6	6q16.3	6q16	-	100475364	100548844	receptor activity	G-protein coupled receptor protein signaling pathway	integral to membrane
GPR146	1.009	0.004	1.047	0.015	1.038	-0.194325	115330	NM_138445	Hs.553555	G protein-coupled receptor 146	||GPR146||G protein-coupled receptor 146||	115330	RefSeq	7	7	7p22.3	7p22.3	+	870381	872138	receptor activity	G-protein coupled receptor protein signaling pathway	integral to membrane
GPR15	0.893	0.023	0.99	0.014	1.108	0.44436	2838	NM_005290	Hs.159900	G protein-coupled receptor 15	||GPR15||G protein-coupled receptor 15||	2838	RefSeq	3	3	3q12.1	3q11.2-q13.1	+	99733567	99734650	purinergic nucleotide receptor activity, G-protein coupled	G-protein coupled receptor protein signaling pathway	integral to plasma membrane
GPR156	1.011	0	0.993	0.006	0.981	-0.714396	165829	NM_153002	Hs.333358	G protein-coupled receptor 156	||GPR156||G protein-coupled receptor 156||	165829	RefSeq	3	3	3q13.33	3q13.33	-	121368568	121445635	GABA-B receptor activity	G-protein coupled receptor protein signaling pathway	integral to membrane
GPR157	0.86	0.003	0.926	0.026	1.077	0.161514	80045	NM_024980	Hs.31181	G protein-coupled receptor 157	||GPR157||G protein-coupled receptor 157||	80045	RefSeq	1	1	1p36.22	1p36.22	-	9121226	9123622	G-protein coupled receptor activity	G-protein coupled receptor protein signaling pathway	integral to membrane
GPR160	0.591	0.01	0.808	0.007	1.366	2.79837	26996	NM_014373	Hs.231320	G protein-coupled receptor 160	||GPR160||G protein-coupled receptor 160||	26996	RefSeq	3	3	3q26.2	3q26.2-q27	+	171239404	171285883	receptor activity	G-protein coupled receptor protein signaling pathway	integral to membrane
GPR161	0.877	0.025	0.933	0.005	1.063	0.0337772	23432	NM_007369	Hs.271809	G protein-coupled receptor 161	||GPR161||G protein-coupled receptor 161||	23432	RefSeq	1	1	1q24.2	1q24.2	-	164791341	164805805	receptor activity	G-protein coupled receptor protein signaling pathway	integral to membrane
GPR17	0.696	0.039	0.827	0.004	1.187	1.16516	2840	NM_005291	Hs.46453	G protein-coupled receptor 17	||DKFZp686M18273||GPR17||G protein-coupled receptor 17||	2840	RefSeq	2	2	2q14.3	2q21	+	128119976	128126442	chemokine receptor activity	G-protein coupled receptor protein signaling pathway	integral to plasma membrane
GPR18	0.985	0.006	1.008	0	1.023	-0.331186	2841	NM_005292	Hs.553492	G protein-coupled receptor 18	||GPR18||G protein-coupled receptor 18||	2841	RefSeq	13	13	13q32.3	13q32	-	98704972	98708629	purinergic nucleotide receptor activity, G-protein coupled	G-protein coupled receptor protein signaling pathway	integral to membrane
GPR19	1.016	0.004	1.081	0.012	1.064	0.0429013	2842	NM_006143	Hs.92458	G protein-coupled receptor 19	||GPR19||G protein-coupled receptor 19||	2842	RefSeq	12	12	12p13.2	12p12.3	-	12705262	12706671	receptor activity	G-protein coupled receptor protein signaling pathway	integral to plasma membrane
GPR2	0.827	0.05	0.865	0.006	1.045	-0.130456	2826	NM_016602	Hs.278446	Runt-related transcription factor 1 (acute myeloid leukemia 1; aml1 oncogene)	||||CCR10||Runt-related transcription factor 1 (acute myeloid leukemia 1; aml1 oncogene)||		RefSeq	17	17	17q21.2	17q21.1-q21.3	-	38084961	38087371	C-C chemokine receptor activity	G-protein coupled receptor protein signaling pathway	integral to plasma membrane
GPR20	0.984	0.019	1.039	0.001	1.056	-0.0300913	2843	NM_005293	Hs.188859	G protein-coupled receptor 20	||GPR20||G protein-coupled receptor 20||	2843	RefSeq	8	8	8q24.3	8q24.2-q24.3	-	142436128	142437205	receptor activity	G-protein coupled receptor protein signaling pathway	integral to plasma membrane
GPR21	0.809	0.018	0.96	0.009	1.185	1.14691	2844	NM_005294	Hs.368372	G protein-coupled receptor 21	||GPR21||G protein-coupled receptor 21||	2844	RefSeq	9	9	9q33.2	9q33	+	122876399	122877449	receptor activity	G-protein coupled receptor protein signaling pathway	integral to plasma membrane
GPR22	0.838	0.037	0.986	0.01	1.175	1.05567	2845	NM_005295	Hs.432557	G protein-coupled receptor 22	||GPR22||G protein-coupled receptor 22||	2845	RefSeq	7	7	7q22.3	7q22-q31.1	+	106708456	106709758	receptor activity	G-protein coupled receptor protein signaling pathway	integral to plasma membrane
GPR23	0.938	0.012	0.99	0.002	1.056	-0.0300913	2846	NM_005296	Hs.522701	G protein-coupled receptor 23	||LPAR4||GPR23||P2RY9||P2Y9||P2Y5-LIKE RECEPTOR||G protein-coupled receptor 23||PURINERGIC RECEPTOR P2Y, G PROTEIN-COUPLED, 9||	2846	RefSeq	X	X	Xq21.1	Xq13-q21.1	+	77816445	77818733	purinergic nucleotide receptor activity, G-protein coupled	G-protein coupled receptor protein signaling pathway	integral to plasma membrane
GPR24	0.965	0.028	1.01	0.005	1.046	-0.121332	2847	NM_005297	Hs.248122	G protein-coupled receptor 24	||MCHR1||SLC1||MGC32129||GPR24||G protein-coupled receptor 24||melanin-concentrating hormone receptor 1||	2847	RefSeq	22	22	22q13.2	22q13.2	+	39399736	39403318	melanin-concentrating hormone receptor activity	G-protein signaling, adenylate cyclase inhibiting pathway	integral to membrane
GPR25	0.852	0.005	1.006	0.029	1.181	1.11042	2848	NM_005298	Hs.534316	G protein-coupled receptor 25	||GPR25||G protein-coupled receptor 25||	2848	RefSeq	1	1	1q32.1	1q32.1	+	197573822	197574908	angiotensin type II receptor activity	G-protein coupled receptor protein signaling pathway	integral to plasma membrane
GPR26	0.971	0.009	1.071	0.001	1.103	0.39874	2849	NM_153442	Hs.12751	G protein-coupled receptor 26	||GPR26||G protein-coupled receptor 26||	2849	RefSeq	10	10	10q26.13	10q26.2	+	125415860	125444113	receptor activity	G-protein coupled receptor protein signaling pathway	integral to membrane
GPR27	0.869	0.007	0.956	0.027	1.1	0.371368	2850	NM_018971	Hs.553493	G protein-coupled receptor 27	||SREB1||GPR27||G protein-coupled receptor 27||SUPERCONSERVED RECEPTOR EXPRESSED IN BRAIN 1||super conserved receptor expressed in brain 1||	2850	RefSeq	3	3	3p13	3p21-p14	+	71885890	71887018	receptor activity	G-protein coupled receptor protein signaling pathway	integral to membrane
GPR3	1.068	0.007	1.109	0.016	1.038	-0.194325	2827	NM_005281	Hs.66542	G protein-coupled receptor 3	||OTTHUMP00000043209||ACCA||GPR3||G protein-coupled receptor 3||adenylate cyclase constitutive activator||	2827	RefSeq	1	1	1p36.11	1p36.1-p35	+	27403293	27406457	G-protein coupled receptor activity, unknown ligand	G-protein coupled receptor protein signaling pathway	integral to plasma membrane
GPR30	0.82	0.055	0.86	0.019	1.048	-0.103084	2852	NM_001505	Hs.552573	G protein-coupled receptor 30	||MGC99678||FEG-1||LERGU2||CMKRL2||GPCR-Br||GPR30||chemokine receptor-like 2||G protein-coupled receptor 30||leucine rich protein in GPR30 3'UTR (LERGU)||	2852	RefSeq	7	7	7p22.3	7p22	+	899752	906692	purinergic nucleotide receptor activity, G-protein coupled	G-protein coupled receptor protein signaling pathway	integral to membrane
GPR31	1.062	0.011	1.026	0.024	0.966	-0.851258	2853	NM_005299	Hs.248124	G protein-coupled receptor 31	||GPR31||G protein-coupled receptor 31||bA517H2.2 (G protein-coupled receptor 31)||	2853	RefSeq	6	6	6q27	6q27	-	167540770	167541730	receptor activity	G-protein coupled receptor protein signaling pathway	integral to plasma membrane
GPR32	1.208	0.008	1.239	0.01	1.025	-0.312937	2854	NM_001506	Hs.515555	G protein-coupled receptor 32	||GPR32||G protein-coupled receptor 32||	2854	RefSeq	19	19	19q13.33	19q13.3	+	55965669	55966740	N-formyl peptide receptor activity	G-protein coupled receptor protein signaling pathway	integral to plasma membrane
GPR34	0.732	0.018	0.956	0.005	1.306	2.25093	2857	NM_005300	Hs.495989	G protein-coupled receptor 34	||GPR34||G protein-coupled receptor 34||	2857	RefSeq	X	X	Xp11.4	Xp11.4-p11.3	+	41304512	41312780	purinergic nucleotide receptor activity, G-protein coupled	G-protein coupled receptor protein signaling pathway	integral to plasma membrane
GPR35	1.058	0.012	1.147	0.004	1.084	0.225383	2859	NM_005301	Hs.239891	G protein-coupled receptor 35	||GPR35||G protein-coupled receptor 35||	2859	RefSeq	2	2	2q37.3	2q37.3	+	241288784	241290659	receptor activity	G-protein coupled receptor protein signaling pathway	integral to plasma membrane
GPR37	0.959	6.617	1.077	0.003	1.123	0.581221	2861	NM_005302	Hs.406094	G protein-coupled receptor 37 (endothelin receptor type B-like)	||EDNRBL||GPR37||PAELR||hET(B)R-LP||Parkin-associated endothelin receptor-like receptor||G protein-coupled receptor 37 (endothelin receptor type B-like)||	2861	RefSeq	7	7	7q31.33	7q31	-	123980066	123999632	G-protein coupled receptor activity, unknown ligand	G-protein coupled receptor protein signaling pathway	integral to plasma membrane
MLNR	0.886	0	0.977	0.015	1.102	0.389616	2862	NM_001507	Hs.248126	Motilin receptor	||MLNR||MTLR1||GPR38||Motilin receptor||MOTILIN RECEPTOR 1||G protein-coupled receptor 38||	2862	RefSeq	13	13	13q14.2	13q14-q21	+	48692474	48694514	growth hormone-releasing hormone receptor activity	G-protein coupled receptor protein signaling pathway	integral to plasma membrane
GPR39	0.841	0.038	0.926	0.003	1.1	0.371368	2863	NM_001508	Hs.551503	G protein-coupled receptor 39	||GPR39||G protein-coupled receptor 39||	2863	RefSeq	2	2	2q21.2	2q21-q22	+	133008347	133236911	receptor activity	G-protein coupled receptor protein signaling pathway	integral to plasma membrane
GPR4	1.063	0.015	1.112	0.033	1.045	-0.130456	2828	NM_005282	Hs.17170	G protein-coupled receptor 4	||GPR4||G protein-coupled receptor 4||	2828	RefSeq	19	19	19q13.32	19q13.3	-	50784864	50787557	G-protein coupled receptor activity, unknown ligand	G-protein coupled receptor protein signaling pathway	integral to plasma membrane
GPR40	0.95	0.008	1.003	0.016	1.054	-0.0483394	2864	NM_005303	Hs.248127	G protein-coupled receptor 40	||GPR40||G protein-coupled receptor 40||	2864	RefSeq	19	19	19q13.12	19q13.1	+	40534294	40535197	receptor activity	G-protein coupled receptor protein signaling pathway	integral to plasma membrane
GPR41	0.882	0.031	0.998	0.009	1.131	0.654214	2865	NM_005304	Hs.248055	G protein-coupled receptor 41	||GPR41||G protein-coupled receptor 41||	2865	RefSeq	19	19	19q13.12	19q13.1	+	40541341	40543227	purinergic nucleotide receptor activity, G-protein coupled	G-protein coupled receptor protein signaling pathway	integral to plasma membrane
GPR42	0.878	0.003	0.972	0.008	1.107	0.435236	2866	NM_005305	Hs.533926	G protein-coupled receptor 42	||GPR42||G protein-coupled receptor 42||	2866	RefSeq	19	19	19q13.12	19q13.1	+	40554101	40555142	purinergic nucleotide receptor activity, G-protein coupled	G-protein coupled receptor protein signaling pathway	integral to plasma membrane
GPR43	0.844	0.017	0.973	0.03	1.153	0.854943	2867	NM_005306	Hs.248056	G protein-coupled receptor 43	||FFA2R||GPR43||G protein-coupled receptor 43||free fatty acid activated receptor 2||	2867	RefSeq	19	19	19q13.12	19q13.1	+	40632456	40633449	purinergic nucleotide receptor activity, G-protein coupled	G-protein coupled receptor protein signaling pathway	integral to plasma membrane
GPR44	1.135	0.001	1.162	0.001	1.023	-0.331186	11251	NM_004778	Hs.299567	G protein-coupled receptor 44	||CRTH2||GPR44||G protein-coupled receptor 44||	11251	RefSeq	11	11	11q12.2	11q12-q13.3	-	60374982	60380020	N-formyl peptide receptor activity	G-protein coupled receptor protein signaling pathway	integral to plasma membrane
GPR45	1.026	0.038	1.09	0.009	1.062	0.0246531	11250	NM_007227	Hs.129701	G protein-coupled receptor 45	||GPR45||G protein-coupled receptor 45||	11250	RefSeq	2	2	2q12.1	2q11.1-q12	+	105316717	105318442	receptor activity	G-protein coupled receptor protein signaling pathway	integral to membrane
GPR48	0.974	0.011	1.072	0.003	1.1	0.371368	55366	NM_018490	Hs.502176	Leucine-rich repeat-containing G protein-coupled receptor 4	||GPR48||LGR4||G PROTEIN-COUPLED RECEPTOR 48||leucine-rich repeat-containing G protein-coupled receptor 4||	55366	RefSeq	11	11	11p14.1	11p14-p13	-	27344085	27450869	protein-hormone receptor activity	G-protein coupled receptor protein signaling pathway	integral to membrane
GPR49	0.842	0.011	0.979	0.014	1.163	0.946184	8549	NM_003667	Hs.172176	Leucine-rich repeat-containing G protein-coupled receptor 5	||GPR49||LGR5||G PROTEIN-COUPLED RECEPTOR 49||leucine-rich repeat-containing G protein-coupled receptor 5||	8549	RefSeq	12	12	12q21.1	12q22-q23	+	70120079	70264889	protein-hormone receptor activity	G-protein coupled receptor protein signaling pathway	integral to plasma membrane
GPR50	0.728	0.015	0.871	0.007	1.196	1.24728	9248	NM_004224	Hs.158329	G protein-coupled receptor 50	||GPR50||G protein-coupled receptor 50||	9248	RefSeq	X	X	Xq28	Xq28	+	150015692	150020505	melatonin receptor activity	G-protein coupled receptor protein signaling pathway	integral to membrane
GPR51	0.972	0.003	0.979	0.006	1.007	-0.477171	9568	NM_005458	Hs.198612	G protein-coupled receptor 51	||GPR51||GABABR2||GABBR2||G protein-coupled receptor 51||	9568	RefSeq	9	9	9q22.33	9q22.1-q22.3	-	98129920	98551034	GABA-B receptor activity	G-protein coupled receptor protein signaling pathway	integral to plasma membrane
GPR52	0.86	0.018	0.981	0	1.14	0.736331	9293	NM_005684	Hs.551519	G protein-coupled receptor 52	||GPR52||G protein-coupled receptor 52||	9293	RefSeq	1	1	1q25.1	1q24	+	171148906	171149992	receptor activity	G-protein coupled receptor protein signaling pathway	integral to plasma membrane
GPR54	1.073	0.006	1.13	0.019	1.053	-0.0574635	84634	NM_032551	Hs.208229	G protein-coupled receptor 54	||GPR54||METASTIN RECEPTOR||G protein-coupled receptor 54||	84634	RefSeq	19	19	19p13.3	19p13.3	+	868502	872001	receptor activity	G-protein coupled receptor protein signaling pathway	integral to membrane
GPR55	0.877	0.004	1.003	0.015	1.144	0.772827	9290	NM_005683	Hs.114545	G protein-coupled receptor 55	||GPR55||G protein-coupled receptor 55||	9290	RefSeq	2	2	2q37.1	2q37	-	231597538	231615446
GPR56	0.945	0.005	1.018	0.012	1.077	0.161514	9289	NM_005682	Hs.513633	G protein-coupled receptor 56	||GPR56||TM7XN1||G protein-coupled receptor 56||7-@TRANSMEMBRANE PROTEIN WITH NO EGF-LIKE N-TERMINAL DOMAINS 1||	9289	RefSeq	16	16	16q13	16q13	+	56211458	56256445	G-protein coupled receptor activity	cell adhesion	integral to membrane
GPR58	0.914	0.002	0.98	0.012	1.071	0.10677	9287	NM_014626	Hs.272382	Trace amine associated receptor 2	||GPR58||TAAR2||G PROTEIN-COUPLED RECEPTOR 58||TRACE AMINE-ASSOCIATED RECEPTOR 2||Trace amine associated receptor 2||	9287	RefSeq	6	6	6q23.2	6q24	-	132979981	132980902	receptor activity	G-protein coupled receptor protein signaling pathway	integral to membrane
GPR6	0.854	0.007	0.977	0.015	1.143	0.763703	2830	NM_005284	Hs.46332	G protein-coupled receptor 6	||GPR6||G protein-coupled receptor 6||	2830	RefSeq	6	6	6q21	6q21	+	110406989	110408615	G-protein coupled receptor activity, unknown ligand	G-protein coupled receptor protein signaling pathway	integral to plasma membrane
GPR61	0.934	0.008	1.019	0.016	1.091	0.289251	83873	NM_031936	Hs.514690	G protein-coupled receptor 61	||GPR61||BALGR||G protein-coupled receptor 61||BIOGENIC AMINE RECEPTOR-LIKE GPCR||	83873	RefSeq	1	1	1p13.3	1p13.3	+	109794550	109800497	G-protein coupled receptor activity, unknown ligand	G-protein coupled receptor protein signaling pathway	integral to membrane
GPR62	0.788	0.02	0.89	0.001	1.128	0.626842	118442	NM_080865	Hs.232213	G protein-coupled receptor 62	||GPR62||G protein-coupled receptor 62||	118442	RefSeq	3	3	3p21.2	3p21.1	+	51964436	51966559	G-protein coupled receptor activity, unknown ligand	G-protein coupled receptor protein signaling pathway	integral to membrane
GPR63	0.885	0.026	0.985	0.014	1.113	0.489981	81491	NM_030784	Hs.485990	G protein-coupled receptor 63	||GPR63||PSP24B||G protein-coupled receptor 63||	81491	RefSeq	6	6	6q16.1	6q16.1-q16.3	-	97352644	97391921	receptor activity	G-protein coupled receptor protein signaling pathway	integral to membrane
GPR64	0.821	0.028	0.853	0.057	1.039	-0.1852	10149	NM_005756	Hs.146978	G protein-coupled receptor 64	||GPR64||HE6||G PROTEIN-COUPLED RECEPTOR, EPIDIDYMIS-SPECIFIC||G protein-coupled receptor 64||	10149	RefSeq	X	X	Xp22.13	Xp22.13	-	18767088	18900243	G-protein coupled receptor activity	neuropeptide signaling pathway	integral to plasma membrane
GPR65	0.943	0.04	0.927	0.037	0.983	-0.696148	8477	NM_003608	Hs.513440	G protein-coupled receptor 65	||GPR65||TDAG8||T-CELL DEATH-ASSOCIATED GENE 8||G protein-coupled receptor 65||	8477	RefSeq	14	14	14q31.3	14q31-q32.1	+	87541248	87548167	receptor activity	G-protein coupled receptor protein signaling pathway	integral to plasma membrane
NMUR1	1.011	0.057	0.924	0.065	0.914	-1.32571	10316	NM_006056	Hs.471619	Neuromedin U receptor 1	||FM3||GPR66||NMU1R||NMUR1||neuromedin U receptor 1||G PROTEIN-COUPLED RECEPTOR 66||GROWTH HORMONE SECRETAGOGUE RECEPTOR FAMILY, MEMBER 3||	10316	RefSeq	2	2	2q37.1	2q37.1	-	232213375	232220707	neuromedin U receptor activity	G-protein signaling, coupled to IP3 second messenger (phospholipase C activating)	integral to membrane
GPR68	1.068	0.087	0.942	0.042	0.881	-1.6268	8111	NM_003485	Hs.525534	G protein-coupled receptor 68	||GPR68||OGR1||G protein-coupled receptor 68||OVARIAN CANCER G PROTEIN-COUPLED RECEPTOR 1||	8111	RefSeq	14	14	14q32.12	14q31	-	90769964	90790022	receptor activity	G-protein coupled receptor protein signaling pathway	integral to plasma membrane
GPR7	1.033	0.061	1.05	0.055	1.016	-0.395054	2831	NM_005285	Hs.248117	G protein-coupled receptor 7	||GPR7||opioid-somatostatin-like receptor 7||G protein-coupled receptor 7||neuropeptides B/W receptor type 1||	2831	RefSeq	8	8	8q11.23	8p22-q21.13	+	54015020	54016007	opioid receptor activity	G-protein coupled receptor protein signaling pathway	integral to membrane
GPR83	1.157	0.02	1.113	0.013	0.961	-0.896878	10888	NM_016540	Hs.272385	G protein-coupled receptor 83	||GPR72||GPR83||GIR, MOUSE, HOMOLOG OF||G PROTEIN-COUPLED RECEPTOR 72||G protein-coupled receptor 83||	10888	RefSeq	11	11	11q21	11q21	-	93750130	93774066	neuropeptide Y receptor activity	G-protein coupled receptor protein signaling pathway	integral to membrane
GPR73	0.954	0.018	0.942	0.043	0.987	-0.659652	10887	NM_138964	Hs.528869	G protein-coupled receptor 73	||PKR1||GPR73||PROKINETICIN RECEPTOR 1||G protein-coupled receptor 73||	10887	RefSeq	2	2	2p13.3	2p13.1	+	68784604	68794359	neuropeptide Y receptor activity	G-protein coupled receptor protein signaling pathway	integral to membrane
GPR73L1	1.052	0.095	0.969	0.013	0.921	-1.26184	128674	NM_144733	Hs.155218	Heterogeneous nuclear ribonucleoprotein U-like 1	||HNRPUL1||E1BAP5||E1B55-ASSOCIATED PROTEIN 5||heterogeneous nuclear ribonucleoprotein U-like 1||ADENOVIRUS E1B 55-KD PROTEIN-ASSOCIATED PROTEIN 5||	11100	RefSeq	19	19	19q13.2	19q13.2	+	46462075	46505438	DNA binding	RNA processing	heterogeneous nuclear ribonucleoprotein complex
GPR74	0.919	0.067	0.923	0.049	1.004	-0.504543	10886	NM_004885	Hs.99231	G protein-coupled receptor 74	||NPFF2||GPR74||NPGPR||NEUROPEPTIDE FF2||G protein-coupled receptor 74||NEUROPEPTIDE G PROTEIN-COUPLED RECEPTOR||	10886	RefSeq	4	4	4q13.3	4q21	+	73262555	73378813	neuropeptide receptor activity	G-protein coupled receptor protein signaling pathway	integral to plasma membrane
GPR75	0.865	0.034	0.904	0.035	1.044	-0.13958	10936	NM_006794	Hs.21691	G protein-coupled receptor 75	||GPR75||G protein-coupled receptor 75||	10936	RefSeq	2	2	2p16.2	2p16	-	53991700	53998719	receptor activity	G-protein coupled receptor protein signaling pathway	integral to plasma membrane
GPR77	0.936	0.022	0.916	0.015	0.978	-0.741769	27202	NM_018485	Hs.534412	G protein-coupled receptor 77	||GPR77||G protein-coupled receptor 77||	27202	RefSeq	19	19	19q13.32	19q13.33	+	52532210	52537112	C5a anaphylatoxin receptor activity	G-protein coupled receptor protein signaling pathway	integral to membrane
GPR78	0.977	0.013	0.935	0	0.956	-0.942498	27201	NM_080819	Hs.350588	G protein-coupled receptor 78	||GPR78||G protein-coupled receptor 78||	27201	RefSeq	4	4	4p16.1	4p16.1	+	8700361	8707589	receptor activity	G-protein coupled receptor protein signaling pathway	integral to membrane
GPR8	1.041	0.058	0.93	0.047	0.893	-1.51731	2832	NM_005286	Hs.248118	G protein-coupled receptor 8	||GPR8||opioid-somatostatin-like receptor 8||G protein-coupled receptor 8||	2832	RefSeq	20	20	20q13.33	20q13.3	-	62207626	62208628	opioid receptor activity	G-protein coupled receptor protein signaling pathway	integral to membrane
GPR80	1.039	0.006	1.003	0.005	0.965	-0.860382	27199	31542855
GPR81	0.983	0.041	0.911	0.001	0.926	-1.21622	27198	NM_032554	Hs.524811	G protein-coupled receptor 81	||GPR81||G protein-coupled receptor 81||	27198	RefSeq	12	12	12q24.31	12q24.31	-	121735610	121740009	receptor activity	G-protein coupled receptor protein signaling pathway	integral to membrane
GPR82	1.021	0.001	0.895	0.028	0.877	-1.6633	27197	NM_080817	Hs.352219	G protein-coupled receptor 82	||GPR82||G protein-coupled receptor 82||	27197	RefSeq	X	X	Xp11.4	Xp11.4	+	41339661	41343703	receptor activity	G-protein coupled receptor protein signaling pathway	integral to membrane
GPR84	1.121	0.051	0.911	0	0.812	-2.25636	53831	NM_020370	Hs.306199	G protein-coupled receptor 84	||GPR84||G protein-coupled receptor 84||	53831	RefSeq	12	12	12q13.13	12q13.13	-	53042496	53044525	G-protein coupled receptor activity, unknown ligand	G-protein coupled receptor protein signaling pathway	integral to membrane
GPR85	0.871	0.026	0.829	0.027	0.952	-0.978994	54329	NM_018970	Hs.152009	G protein-coupled receptor 85	||GPR85||SREB2||G protein-coupled receptor 85||SUPERCONSERVED RECEPTOR EXPRESSED IN BRAIN 2||	54329	RefSeq	7	7	7q31.1	7q31	-	112314418	112321730	receptor activity	G-protein coupled receptor protein signaling pathway	integral to membrane
GPR86	0.924	0.028	0.802	0.01	0.868	-1.74542	53829	NM_023914	Hs.546396	Purinergic receptor P2Y, G-protein coupled, 13	||GPR86||P2RY13||GPR94||G PROTEIN-COUPLED RECEPTOR 86||purinergic receptor P2Y, G-protein coupled, 13||	53829	RefSeq	3	3	3q25.1	3q24	-	152526793	152529651
GPR87	0.82	0.018	0.805	0.018	0.981	-0.714396	53836	NM_023915	Hs.58561	G protein-coupled receptor 87	||GPR87||GPR95||G protein-coupled receptor 87||	53836	RefSeq	3	3	3q25.1	3q24	-	152494594	152517334	G-protein coupled receptor activity, unknown ligand	G-protein coupled receptor protein signaling pathway	integral to membrane
GPR88	0.961	0.001	1.017	0.009	1.058	-0.0118431	54112	NM_022049	Hs.170053	G-protein coupled receptor 88	||GPR88||STRG||G-protein coupled receptor 88||G PROTEIN-COUPLED RECEPTOR 88||STRIATUM-SPECIFIC G PROTEIN-COUPLED RECEPTOR||	54112	RefSeq	1	1	1p21.2	1p21.3	+	100715713	100719591	G-protein coupled receptor activity, unknown ligand	G-protein coupled receptor protein signaling pathway	integral to membrane
GPR91	1.084	0.023	1.046	0.022	0.965	-0.860382	56670	NM_033050	Hs.279575	Succinate receptor 1	||GPR91||SUCNR1||Succinate receptor 1||G PROTEIN-COUPLED RECEPTOR 91||	56670	RefSeq	3	3	3q25.1	3q24-3q25.1	+	153074134	153082348	G-protein coupled receptor activity, unknown ligand	G-protein coupled receptor protein signaling pathway	integral to membrane
GPR92	1.209	0.001	1.179	0.023	0.975	-0.769141	57121	NM_020400	Hs.155538	G protein-coupled receptor 92	||GPR92||GPR93||G protein-coupled receptor 92||	57121	RefSeq	12	12	12p13.31	12p13.31	-	6598261	6615548	purinergic nucleotide receptor activity, G-protein coupled	G-protein coupled receptor protein signaling pathway	integral to membrane
GPR97	0.989	0.032	0.986	0.009	0.996	-0.577535	222487	NM_170776	Hs.383403	G protein-coupled receptor 97	||GPR97||G protein-coupled receptor 97||	222487	RefSeq	16	16	16q13	16q13	+	56259671	56280789	G-protein coupled receptor activity	neuropeptide signaling pathway	integral to membrane
GPRC5B	1.078	0.03	1.035	0.036	0.959	-0.915126	51704	NM_016235	Hs.148685	G protein-coupled receptor, family C, group 5, member B	||RAIG2||GPRC5B||RETINOIC ACID-INDUCIBLE GENE 2||G protein-coupled receptor, family C, group 5, member B||	51704	RefSeq	16	16	16p12.3	16p12	-	19777795	19803652	metabotropic glutamate, GABA-B-like receptor activity	G-protein coupled receptor protein signaling pathway	integral to membrane
GPRC5C	0.952	0.002	0.968	0.009	1.016	-0.395054	55890	NM_018653	Hs.446438	G protein-coupled receptor, family C, group 5, member C	||RAIG3||GPRC5C||RETINOIC ACID-INDUCIBLE GENE 3||G protein-coupled receptor, family C, group 5, member C||	55890	RefSeq	17	17	17q25.1	17q25	+	69941430	69955161	metabotropic glutamate, GABA-B-like receptor activity	G-protein coupled receptor protein signaling pathway	integral to plasma membrane
GPRC5D	1.012	0.013	1.04	0.008	1.027	-0.294689	55507	NM_018654	Hs.546402	G protein-coupled receptor, family C, group 5, member D	||GPRC5D||G protein-coupled receptor, family C, group 5, member D||	55507	RefSeq	12	12	12p13.1	12p13.3	-	12984975	12994585	metabotropic glutamate, GABA-B-like receptor activity	G-protein coupled receptor protein signaling pathway	integral to membrane
GPRC6A	1.15	0.034	1.025	0.029	0.891	-1.53556	222545	NM_148963	Hs.266745	G protein-coupled receptor, family C, group 6, member A	||GPRC6A||G protein-coupled receptor, family C, group 6, member A||	222545	RefSeq	6	6	6q22.1	6q22.1	-	117219940	117256891	metabotropic glutamate, GABA-B-like receptor activity	G-protein coupled receptor protein signaling pathway	integral to membrane
GRK4	0.915	0.021	0.938	0.004	1.025	-0.312937	2868	NM_005307	Hs.32959	G protein-coupled receptor kinase 4	||IT11||2.7.1.-||GRK4||GRK4a||GPRK2L||GPRK4||G protein-coupled receptor kinase 4||G-protein coupled receptor kinase 4||G PROTEIN-DEPENDENT RECEPTOR KINASE 4||G protein-coupled receptor kinase 2-like (Drosophila)||G PROTEIN-COUPLED RECEPTOR KINASE 2 (DROSOPHILA)-LIKE||G protein-coupled receptor kinase 4 isoform gamma||G protein-coupled receptor kinase 4 isoform alpha||G protein-coupled receptor ki…	2868	RefSeq	4	4	4p16.3	4p16.3	+	3002704	3079479	ATP binding	protein amino acid phosphorylation
GRK5	0.824	0.004	0.87	0.004	1.056	-0.0300913	2869	NM_005308	Hs.524625	G protein-coupled receptor kinase 5	||2.7.1.-||GRK5||GPRK5||G protein-coupled receptor kinase 5||	2869	RefSeq	10	10	10q26.11	10q24-qter	+	120957192	121205125	ATP binding	G-protein signaling, coupled to cAMP nucleotide second messenger	cytoplasm
GRK6	0.984	0.05	1.05	0.031	1.066	0.0611494	2870	NM_002082	Hs.235116	G protein-coupled receptor kinase 6	||2.7.1.-||FLJ32135||GPRK6||GRK6||G protein-coupled receptor kinase 6||G protein-coupled receptor kinase 6 isoform A||G protein-coupled receptor kinase 6 isoform B||G protein-coupled receptor kinase 6 isoform C||	2870	RefSeq	5	5	5q35.3	5q35	+	176786390	176802456	ATP binding	protein amino acid phosphorylation
GRK7	1.002	0.014	1.067	0.013	1.065	0.0520254	131890	NM_139209	Hs.102513	G protein-coupled receptor kinase 7	||GRK7||GPRK7||G protein-coupled receptor kinase 7||	131890	RefSeq	3	3	3q23	3q21-q23	+	142979740	143020021	ATP binding	protein amino acid phosphorylation
GRCA	0.902	0	1.015	0.025	1.125	0.59947	27239	NM_019858	Hs.418105	Gene rich cluster, A gene	||GRCA||gene rich cluster, A gene||	27239	RefSeq	12	12	12p13.31	12p13	+	6801223	6806844	oxidoreductase activity	G-protein coupled receptor protein signaling pathway	integral to membrane
LGR8	1.087	0.016	1.062	0.025	0.976	-0.760017	122042	NM_130806	Hs.531002	Leucine-rich repeat-containing G protein-coupled receptor 8	||LGR8||GREAT||leucine-rich repeat-containing G protein-coupled receptor 8||	122042	RefSeq	13	13	13q13.1	13q13.1	+	31211678	31275009	receptor activity	G-protein coupled receptor protein signaling pathway	integral to membrane
GRM1	0.982	0.023	1.136	0.021	1.156	0.882316	2911	NM_000838	Hs.32945	Glutamate receptor, metabotropic 1	||GRM1A||MGLUR1-ALPHA||GRM1||mGlu1||GPRC1A||MGLUR1A||GRM1-ALPHA||GLUTAMATE RECEPTOR, METABOTROPIC, 1||Glutamate receptor, metabotropic 1||	2911	RefSeq	6	6	6q24.3	6q24	+	146392111	146800427	metabotropic glutamate, GABA-B-like receptor activity	G-protein coupled receptor protein signaling pathway	integral to membrane
GRM2	1.078	0.027	1.093	0.01	1.013	-0.422426	2912	NM_000839	Hs.121510	Glutamate receptor, metabotropic 2	||GPRC1B||MGLUR2||GRM2||mGlu2||glutamate receptor homolog||GLUTAMATE RECEPTOR, METABOTROPIC, 2||Glutamate receptor, metabotropic 2||glutamate receptor, metabotropic 2 precursor||	2912	RefSeq	3	3	3p21.2	3p21.2	+	51718037	51727168	metabotropic glutamate, GABA-B-like receptor activity	G-protein coupled receptor protein signaling pathway	integral to membrane
GRM3	0.865	0.014	0.897	0.002	1.036	-0.212573	2913	NM_000840	Hs.112621	Glutamate receptor, metabotropic 3	||GPRC1C||MGLUR3||mGlu3||GRM3||GLUTAMATE RECEPTOR, METABOTROPIC, 3||Glutamate receptor, metabotropic 3||glutamate receptor, metabotropic 3 precursor||	2913	RefSeq	7	7	7q21.12	7q21.1-q21.2	+	85917880	86138843	metabotropic glutamate, GABA-B-like receptor activity	G-protein coupled receptor protein signaling pathway	integral to plasma membrane
GRM4	0.88	0.019	0.875	0.015	0.994	-0.595784	2914	NM_000841	Hs.429018	Glutamate receptor, metabotropic 4	||MGLUR4||GRM4||mGlu4||GPRC1D||GLUTAMATE RECEPTOR, METABOTROPIC, 4||Glutamate receptor, metabotropic 4||	2914	RefSeq	6	6	6p21.31	6p21.3	-	34097606	34209421	metabotropic glutamate, GABA-B-like receptor activity	G-protein coupled receptor protein signaling pathway	integral to membrane
GRM5	0.918	0.008	0.966	0.015	1.051	-0.0757116	2915	NM_000842	Hs.147361	Glutamate receptor, metabotropic 5	||MGLUR5B||GRM5||mGlu5||GPRC1E||MGLUR5A||GLUTAMATE RECEPTOR, METABOTROPIC, 5||Glutamate receptor, metabotropic 5||	2915	RefSeq	11	11	11q14.3	11q14.3	-	87880625	88420838	metabotropic glutamate, GABA-B-like receptor activity	G-protein coupled receptor protein signaling pathway	integral to plasma membrane
GRM6	0.928	0.012	0.949	0	1.022	-0.34031	2916	NM_000843	Hs.248131	Glutamate receptor, metabotropic 6	||mGlu6||GPRC1F||GRM6||MGLUR6||seven transmembrane helix receptor||GLUTAMATE RECEPTOR, METABOTROPIC, 6||Glutamate receptor, metabotropic 6||glutamate receptor, metabotropic 6 precursor||	2916	RefSeq	5	5	5q35.3	5q35	-	178337937	178354730	metabotropic glutamate, GABA-B-like receptor activity	detection of visible light	integral to membrane
GRM7	1.307	0.019	1.285	0.02	0.982	-0.705272	2917	NM_000844	Hs.475336	Glutamate receptor, metabotropic 7	||mGlu7||GPRC1G||MGLUR7||GRM7||GLUTAMATE RECEPTOR, METABOTROPIC, 7||Glutamate receptor, metabotropic 7||glutamate receptor, metabotropic 7 isoform a precursor||glutamate receptor, metabotropic 7 isoform c precursor||glutamate receptor, metabotropic 7 isoform b precursor||	2917	RefSeq	3	3	3p26.1	3p26.1-p25.1	+	6877926	7758217	metabotropic glutamate, GABA-B-like receptor activity	G-protein coupled receptor protein signaling pathway	integral to membrane
GRM8	1.169	0.009	1.125	0.002	0.962	-0.887754	2918	NM_000845	Hs.449625	Glutamate receptor, metabotropic 8	||GPRC1H||MGLUR8||GRM8||mGlu8||GLUTAMATE RECEPTOR, METABOTROPIC, 8||Glutamate receptor, metabotropic 8||glutamate receptor, metabotropic 8 precursor||	2918	RefSeq	7	7	7q31.33	7q31.3-q32.1	-	125672607	126477261	metabotropic glutamate, GABA-B-like receptor activity	G-protein coupled receptor protein signaling pathway	integral to plasma membrane
GRPR	1.2	0.006	1.225	0.024	1.021	-0.349434	2925	NM_005314	Hs.73883	Gastrin-releasing peptide receptor	||GRPR||GRP-preferring bombesin receptor||Gastrin-releasing peptide receptor||	2925	RefSeq	X	X	Xp22.2	Xp22.2-p22.13	+	15901335	15930598	bombesin receptor activity	G-protein coupled receptor protein signaling pathway	integral to plasma membrane
H963	1.207	0	1.106	0.029	0.916	-1.30746	29909	NM_013308	Hs.549152	G protein-coupled receptor 171	||GPR171||G protein-coupled receptor 171||	29909	RefSeq	3	3	3q25.1	3q25.1	-	152398317	152403677	purinergic nucleotide receptor activity, G-protein coupled	G-protein coupled receptor protein signaling pathway	integral to membrane
GPR109B	1.146	0.005	1.113	0.029	0.971	-0.805637	8843	NM_006018	Hs.458425	G protein-coupled receptor 109B	||GPR109B||CHEMOKINE RECEPTOR HM74||NICOTINIC ACID RECEPTOR||G protein-coupled receptor 109B||PUMAG, MOUSE, HOMOLOG OF||	8843	RefSeq	12	12	12q24.31	12q24.31	-	121724182	121726224	purinergic nucleotide receptor activity, G-protein coupled	G-protein coupled receptor protein signaling pathway	integral to plasma membrane
GPR109A	0.993	0.014	1.013	0.028	1.019	-0.367682	338442	NM_177551	Hs.524812	G protein-coupled receptor 109A	||GPR109A||HM74A||G protein-coupled receptor 109A||	338442	RefSeq	12	12	12q24.31	12q24.31	-	121710720	121712784	purinergic nucleotide receptor activity, G-protein coupled	G-protein coupled receptor protein signaling pathway	integral to membrane
HRH1	0.977	0.002	1.055	0.029	1.079	0.179762	3269	NM_000861	Hs.1570	Histamine receptor H1	||HRH1||histamine receptor H1||BPHS, MOUSE, HOMOLOG OF||	3269	RefSeq	3	3	3p25.3	3p25	+	11269399	11279415	histamine receptor activity	G-protein signaling, coupled to IP3 second messenger (phospholipase C activating)	integral to plasma membrane
HRH2	1.207	0.02	1.152	0.031	0.954	-0.960746	3274	NM_022304	Hs.247885	Histamine receptor H2	||HRH2||histamine receptor H2||	3274	RefSeq	5	5	5q35.2	5q35.2	+	175042317	175044162	histamine receptor activity	G-protein signaling, coupled to cyclic nucleotide second messenger	integral to plasma membrane
HRH3	0.831	0.001	0.856	0.017	1.03	-0.267317	11255	NM_007232	Hs.251399	Histamine receptor H3	||HRH3||GPCR97||histamine receptor H3||G PROTEIN-COUPLED RECEPTOR 97||	11255	RefSeq	20	20	20q13.33	20q13.33	-	60223421	60228707	histamine receptor activity	G-protein coupled receptor protein signaling pathway	integral to membrane
HRH4	0.997	0.006	1.024	0.001	1.026	-0.303813	59340	NM_021624	Hs.287388	Histamine receptor H4	||HRH4||HH4R||histamine receptor H4||	59340	RefSeq	18	18	18q11.2	18q11.2	+	20294590	20313918	histamine receptor activity	G-protein coupled receptor protein signaling pathway	integral to membrane
HTR1A	0.934	0.077	0.894	0	0.956	-0.942498	3350	NM_000524	Hs.247940	5-hydroxytryptamine (serotonin) receptor 1A	||HTR1A||SEROTONIN 5-HT-1A RECEPTOR||5-@HYDROXYTRYPTAMINE RECEPTOR 1A||5-hydroxytryptamine (serotonin) receptor 1A||BETA-2-ADRENERGIC RECEPTOR-LIKE PROTEIN G-21||	3350	RefSeq	5	5	5q12.3	5q11.2-q13	-	63292033	63293302	receptor activity	G-protein coupled receptor protein signaling pathway	integral to plasma membrane
HTR1B	0.998	0.009	0.957	0	0.958	-0.92425	3351	NM_000863	Hs.123016	5-hydroxytryptamine (serotonin) receptor 1B	||HTR1B||HTR1DB||5-@HYDROXYTRYPTAMINE-1D-BETA RECEPTOR||SEROTONIN 5-HT-1B RECEPTOR||SEROTONIN 5-HT-1D-BETA RECEPTOR||5-@HYDROXYTRYPTAMINE RECEPTOR 1B||5-hydroxytryptamine (serotonin) receptor 1B||	3351	RefSeq	6	6	6q14.1	6q13	-	78228666	78229839	receptor activity	G-protein signaling, coupled to cyclic nucleotide second messenger	integral to plasma membrane
HTR1D	1.129	0.02	1.158	0.022	1.025	-0.312937	3352	NM_000864	Hs.121482	5-hydroxytryptamine (serotonin) receptor 1D	||HTR1DA||RDC4||HTR1D||5-@HYDROXYTRYPTAMINE RECEPTOR 1D-ALPHA||SEROTONIN 5-HT-1D RECEPTOR||5-hydroxytryptamine (serotonin) receptor 1D||	3352	RefSeq	1	1	1p36.12	1p36.3-p34.3	-	23263694	23266528	receptor activity	G-protein signaling, coupled to cyclic nucleotide second messenger	integral to plasma membrane
HTR1E	1.146	0.003	1.119	0.021	0.976	-0.760017	3354	NM_000865	Hs.1611	5-hydroxytryptamine (serotonin) receptor 1E	||HTR1E||SEROTONIN 5-HT-1E RECEPTOR||5-@HYDROXYTRYPTAMINE RECEPTOR 1E||5-hydroxytryptamine (serotonin) receptor 1E||	3354	RefSeq	6	6	6q15	6q14-q15	+	87704128	87783115	receptor activity	G-protein signaling, coupled to cyclic nucleotide second messenger	integral to plasma membrane
HTR1F	1.213	0.024	1.173	0.018	0.967	-0.842133	3355	NM_000866	Hs.248136	5-hydroxytryptamine (serotonin) receptor 1F	||HTR1F||MR77||HTR1EL||5-@HYDROXYTRYPTAMINE-1E-LIKE RECEPTOR||SEROTONIN 5-HT-1E-LIKE RECEPTOR||SEROTONIN 5-HT-1F RECEPTOR||5-@HYDROXYTRYPTAMINE RECEPTOR 1F||5-hydroxytryptamine (serotonin) receptor 1F||	3355	RefSeq	3	3	3p11.1	3p12	+	88122589	88123690	receptor activity	G-protein signaling, coupled to cyclic nucleotide second messenger	integral to plasma membrane
HTR2A	1.212	0.013	1.116	0.034	0.92	-1.27096	3356	NM_000621	Hs.424980	5-hydroxytryptamine (serotonin) receptor 2A	||HTR2A||HTR2, FORMERLY||5-@HYDROXYTRYPTAMINE RECEPTOR 2A||SEROTONIN 5-HT-2A RECEPTOR||5-hydroxytryptamine (serotonin) receptor 2A||SEROTONIN 5-HT-2 RECEPTOR, FORMERLY||	3356	RefSeq	13	13	13q14.2	13q14-q21	-	46305513	46368174	receptor activity	serotonin receptor signaling pathway	integral to plasma membrane
HTR2C	0.984	0.027	0.961	0.013	0.976	-0.760017	3358	NM_000868	Hs.149037	5-hydroxytryptamine (serotonin) receptor 2C	||HTR2C||HTR1C, FORMERLY||SEROTONIN 5-HT-2C RECEPTOR||5-@HYDROXYTRYPTAMINE RECEPTOR 2C||5-hydroxytryptamine (serotonin) receptor 2C||SEROTONIN 5-HT-1C RECEPTOR, FORMERLY||	3358	RefSeq	X	X	Xq23	Xq24	+	113641530	113967604	receptor activity	feeding behavior	integral to plasma membrane
HTR3A	1.198	0.005	1.132	0.01	0.944	-1.05199	3359	NM_000869	Hs.413899	5-hydroxytryptamine (serotonin) receptor 3A	||HTR3A||SEROTONIN 5-HT-3 RECEPTOR||5-@HYDROXYTRYPTAMINE RECEPTOR 3A||5-hydroxytryptamine (serotonin) receptor 3A||	3359	RefSeq	11	11	11q23.2	11q23.1	+	113351119	113366242	extracellular ligand-gated ion channel activity	digestion	integral to plasma membrane
HTR3B	0.842	0.02	0.882	0.029	1.046	-0.121332	9177	NM_006028	Hs.241377	5-hydroxytryptamine (serotonin) receptor 3B	||HTR3B||SEROTONIN 5-HT-3B RECEPTOR||5-@HYDROXYTRYPTAMINE RECEPTOR 3B||5-hydroxytryptamine (serotonin) receptor 3B||	9177	RefSeq	11	11	11q23.2	11q23.1	+	113280798	113322492	extracellular ligand-gated ion channel activity	ion transport	integral to plasma membrane
HTR4	0.831	0	0.89	0.003	1.07	0.0976457	3360	NM_000870	Hs.483773	5-hydroxytryptamine (serotonin) receptor 4	||HTR4||CARDIAC 5-HT4 RECEPTOR||5-@HYDROXYTRYPTAMINE RECEPTOR 4||SEROTONIN 5-HT-4 RECEPTOR||SEROTONIN 5-HT-4A RECEPTOR||5-hydroxytryptamine (serotonin) receptor 4||	3360	RefSeq	5	5	5q32	5q31-q33	-	147841291	148013909	adrenoceptor activity	G-protein signaling, coupled to cyclic nucleotide second messenger	integral to plasma membrane
HTR5A	1.042	0.038	0.995	0.009	0.955	-0.951622	3361	NM_024012	Hs.65791	5-hydroxytryptamine (serotonin) receptor 5A	||HTR5A||5-@HYDROXYTRYPTAMINE RECEPTOR 5A||SEROTONIN 5-HT-5A RECEPTOR||5-hydroxytryptamine (serotonin) receptor 5A||	3361	RefSeq	7	7	7q36.2	7q36.1	+	154300257	154313845	receptor activity	G-protein coupled receptor protein signaling pathway	integral to plasma membrane
HTR6	1.091	0.026	1.081	0.013	0.991	-0.623156	3362	NM_000871	Hs.22180	5-hydroxytryptamine (serotonin) receptor 6	||HTR6||5-@HYDROXYTRYPTAMINE RECEPTOR 6||SEROTONIN 5-HT-6 RECEPTOR||5-hydroxytryptamine (serotonin) receptor 6||	3362	RefSeq	1	1	1p36.13	1p36-p35	+	19737085	19751361	histamine receptor activity	G-protein signaling, coupled to cyclic nucleotide second messenger	integral to plasma membrane
HTR7	1.07	0.004	1.073	0.025	1.002	-0.522791	3363	NM_000872	Hs.73739	5-hydroxytryptamine (serotonin) receptor 7 (adenylate cyclase-coupled)	||HTR7||5-@HYDROXYTRYPTAMINE RECEPTOR 7||SEROTONIN 5-HT-7 RECEPTOR||5-hydroxytryptamine (serotonin) receptor 7 (adenylate cyclase-coupled)||	3363	RefSeq	10	10	10q23.31	10q21-q24	-	92490557	92607651	melanocortin receptor activity	G-protein coupled receptor protein signaling pathway	integral to membrane
IL8	1.21	0	1.124	0.01	0.928	-1.19797	3576	NM_000584	Hs.624	Interleukin 8	||SCYB8||GCP1||IL8||CXCL8||NAP1||Interleukin 8||NEUTROPHIL-ACTIVATING PEPTIDE 1||MONOCYTE-DERIVED NEUTROPHIL CHEMOTACTIC FACTOR||GRANULOCYTE CHEMOTACTIC PROTEIN 1||CXC CHEMOKINE LIGAND 8||SMALL INDUCIBLE CYTOKINE SUBFAMILY B, MEMBER 8||	3576	RefSeq	4	4	4q13.3	4q13-q21	+	74971309	74974466	chemokine activity	G-protein coupled receptor protein signaling pathway	extracellular space
IL8RA	1.207	0.015	1.193	0.001	0.988	-0.650528	3577	NM_000634	Hs.194778	Interleukin 8 receptor, alpha	||IL8R1||IL8RA||CXCR1||CHEMOKINE (C-X-C) RECEPTOR 1||Interleukin 8 receptor, alpha||INTERLEUKIN 8 RECEPTOR, TYPE 1||	3577	RefSeq	2	2	2q35	2q35	-	218853075	218857222	interleukin-8 receptor activity	G-protein coupled receptor protein signaling pathway	integral to membrane
IL8RB	0.982	0.014	0.963	0.011	0.98	-0.723521	3579	NM_001557	Hs.846	Interleukin 8 receptor, beta	||IL8R2||IL8RB||CXCR2||CHEMOKINE (C-X-C) RECEPTOR 2||Interleukin 8 receptor, beta||INTERLEUKIN 8 RECEPTOR, TYPE 2||	3579	RefSeq	2	2	2q35	2q35	+	218816251	218827481	interleukin-8 receptor activity	G-protein signaling, coupled to IP3 second messenger (phospholipase C activating)	cytoplasm
OR5P3	1.077	0.002	1.016	0.003	0.942	-1.07024	120066	NM_153445	Hs.351825	Olfactory receptor, family 5, subfamily P, member 3	||OR5P3||olfactory receptor, family 5, subfamily P, member 3||	120066	RefSeq	11	11	11p15.4	11p15.4	-	7803159	7804095	olfactory receptor activity	G-protein coupled receptor protein signaling pathway	integral to membrane
OR5P2	0.739	0.019	0.827	0.006	1.119	0.544725	120065	NM_153444	Hs.351824	Olfactory receptor, family 5, subfamily P, member 2	||OR5P2||olfactory receptor, family 5, subfamily P, member 2||	120065	RefSeq	11	11	11p15.4	11p15.4	-	7774096	7775065	olfactory receptor activity	G-protein coupled receptor protein signaling pathway	integral to membrane
OR10A5	0.981	0	0.999	0.009	1.018	-0.376806	144124	NM_178168	Hs.447478	Olfactory receptor, family 10, subfamily A, member 5	||OR10A1||OR10A5||OR11-403||OLFACTORY RECEPTOR, FAMILY 10, SUBFAMILY A, MEMBER 1||olfactory receptor, family 10, subfamily A, member 5||	144124	RefSeq	11	11	11p15.4	11p15.4	+	6823489	6824443	olfactory receptor activity	G-protein coupled receptor protein signaling pathway	integral to membrane
KCNJ3	0.722	0.012	0.802	0.014	1.111	0.471733	3760	NM_002239	Hs.199776	Potassium inwardly-rectifying channel, subfamily J, member 3	||GIRK1||KCNJ3||INWARDLY RECTIFYING POTASSIUM CHANNEL Kir3.1||potassium inwardly-rectifying channel, subfamily J, member 3||POTASSIUM CHANNEL, INWARDLY RECTIFYING, SUBFAMILY J, MEMBER 3||	3760	RefSeq	2	2	2q24.1	2q24.1	+	155380600	155538522	G-protein activated inward rectifier potassium channel activity	ion transport	integral to membrane
KCNJ5	1.036	0.039	1.069	0.029	1.031	-0.258193	3762	NM_000890	Hs.444595	Potassium inwardly-rectifying channel, subfamily J, member 5	||KCNJ5||KATP1||GIRK4||ATP-SENSITIVE POTASSIUM CHANNEL, CARDIAC||potassium inwardly-rectifying channel, subfamily J, member 5||POTASSIUM CHANNEL, INWARDLY RECTIFYING, SUBFAMILY J, MEMBER 5||	3762	RefSeq	11	11	11q24.3	11q24	+	128266522	128293174	G-protein activated inward rectifier potassium channel activity	ion transport	integral to membrane
KCNJ6	0.878	0.011	0.91	0.017	1.036	-0.212573	3763	NM_002240	Hs.50927	Potassium inwardly-rectifying channel, subfamily J, member 6	||KCNJ6||GIRK2||KCNJ7, FORMERLY||potassium inwardly-rectifying channel, subfamily J, member 6||POTASSIUM CHANNEL, INWARDLY RECTIFYING, SUBFAMILY J, MEMBER 6||POTASSIUM CHANNEL, INWARDLY RECTIFYING, SUBFAMILY J, MEMBER 7, FORMERLY||	3763	RefSeq	21	21	21q22.13	21q22.1	-	37918656	38210566	G-protein activated inward rectifier potassium channel activity	ion transport	integral to membrane
KCNJ9	1.061	0.003	1.175	0	1.106	0.426112	3765	NM_004983	Hs.66726	Potassium inwardly-rectifying channel, subfamily J, member 9	||KCNJ9||GIRK3||G PROTEIN-COUPLED INWARD RECTIFIER POTASSIUM CHANNEL||potassium inwardly-rectifying channel, subfamily J, member 9||	3765	RefSeq	1	1	1q23.2	1q21-q23	+	156864432	156872285	G-protein activated inward rectifier potassium channel activity	ion transport	integral to membrane
LANCL1	0.945	0	1.029	0.01	1.088	0.261879	10314	NM_006055	Hs.13351	LanC lantibiotic synthetase component C-like 1 (bacterial)	||LANCL1||GPR69A||LanC-LIKE 1||G PROTEIN-COUPLED RECEPTOR 69A||LANTHIONINE-SYNTHETASE COMPONENT C-LIKE 1 G PROTEIN-COUPLED RECEPTOR||LanC lantibiotic synthetase component C-like 1 (bacterial)||	10314	RefSeq	2	2	2q34	2q33-q35	-	211121481	211166937	G-protein coupled receptor activity	G-protein coupled receptor protein signaling pathway	integral to plasma membrane
GPSM2	0.959	0.028	0.994	0.001	1.036	-0.212573	29899	NM_013296	Hs.489353	G-protein signalling modulator 2 (AGS3-like, C. elegans)	||LGN||GPSM2||TRANSDUCIN-BINDING PARTNER, ROD-SPECIFIC||LEU-GLY-ASN REPEAT-ENRICHED PROTEIN||G PROTEIN SIGNALING MODULATOR 2||G-protein signalling modulator 2 (AGS3-like, C. elegans)||	29899	RefSeq	1	1	1p13.3	1p13.3	+	109131868	109185060	GTPase activator activity	G-protein coupled receptor protein signaling pathway
LGR7	0.981	0.009	1.006	0.015	1.024	-0.322061	59350	NM_021634	Hs.196119	Leucine-rich repeat-containing G protein-coupled receptor 7	||LGR7||leucine-rich repeat-containing G protein-coupled receptor 7||	59350	RefSeq	4	4	4q32.1	4q32.1	+	159800733	159930812	receptor activity	G-protein coupled receptor protein signaling pathway	integral to membrane
LHCGR	0.932	0.039	0.971	0.021	1.041	-0.166952	3973	NM_000233	Hs.468490	Luteinizing hormone/choriogonadotropin receptor	||LHCGR||LCGR||LUTROPIN-CHORIOGONADOTROPIN RECEPTOR||LEYDIG CELL AGENESIS||LEYDIG CELL ADENOMA||Luteinizing hormone/choriogonadotropin receptor||LEYDIG CELL HYPOPLASIA||GONADOTROPIN RECEPTOR GONADOTROPIN UNRESPONSIVENESS||	3973	RefSeq	2	2	2p16.3	2p21	-	48825619	48894468	lutropin-choriogonadotropic hormone receptor activity	G-protein signaling, coupled to cyclic nucleotide second messenger	endosome
LOC115131	0.936	0.024	0.941	0.001	1.005	-0.495419	115131	NM_145242					RefSeq	2		2p13.3		+	71162859	71168713
LPHN1	0.931	0.026	0.983	0.014	1.056	-0.0300913	22859	NM_014921	Hs.94229	Latrophilin 1	||LPHN1||Latrophilin 1||	22859	RefSeq	19	19	19p13.12	19p13.2	-	14121764	14177981	G-protein coupled receptor activity	neuropeptide signaling pathway	integral to membrane
ENPP2	0.816	0.016	0.876	0.011	1.073	0.125018	5168	NM_006209	Hs.190977	Ectonucleotide pyrophosphatase/phosphodiesterase 2 (autotaxin)	||PDI-ALPHA||ENPP2||PDNP2||ATX||LYSOPHOSPHOLIPASE D||Ectonucleotide pyrophosphatase/phosphodiesterase 2 (autotaxin)||PHOSPHODIESTERASE I/NUCLEOTIDE PYROPHOSPHATASE 2||	5168	RefSeq	8	8	8q24.12	8q24.1	-	120638506	120720251	endonuclease activity	G-protein coupled receptor protein signaling pathway	integral to plasma membrane
LPHN2	0.855	0.027	0.871	0.064	1.019	-0.367682	23266	NM_012302	Hs.24212	Latrophilin 2	||LPHH1||LPHN2||Latrophilin 2||LECTOMEDIN 1||LATROPHILIN HOMOLOG 1||	23266	RefSeq	1	1	1p31.1	1p31.1	+	81978102	82169901	G-protein coupled receptor activity	neuropeptide signaling pathway	integral to membrane
LPHN3	0.913	0.034	1.093	0.029	1.196	1.24728	23284	NM_015236	Hs.411097	Latrophilin 3	||LPHN3||Latrophilin 3||	23284	RefSeq	4	4	4q13.1	4q13.1	+	61896140	62766933	G-protein coupled receptor activity	neuropeptide signaling pathway	integral to membrane
LTB4R	0.796	0.006	0.926	0.028	1.162	0.93706	1241	NM_181657	Hs.525256	Leukotriene B4 receptor	||BLTR||LTB4R1||BLT1||LTB4R||LTBR1||PURINOCEPTOR P2Y7||chemokine receptor-like 1||leukotriene B4 receptor||P2RY7, GPR16, CMKRL1||G protein-coupled receptor 16||LEUKOTRIENE B4 G PROTEIN-COUPLED RECEPTOR||PURINERGIC RECEPTOR P2Y, G PROTEIN-COUPLED, 7||purinergic receptor P2Y, G-protein coupled, 7||	1241	RefSeq	14	14	14q11.2	14q11.2-q12	+	23852356	23855990	leukotriene receptor activity	G-protein signaling, coupled to IP3 second messenger (phospholipase C activating)	integral to plasma membrane
LTB4R2	1.041	0.066	1.053	0.026	1.011	-0.440674	56413	NM_019839	Hs.130685	Cell death-inducing DFFA-like effector b	||||LTB4R2||Cell death-inducing DFFA-like effector b||		RefSeq	14	14	14q11.2	14q11.2-q12	+	23848000	23850798	leukotriene receptor activity	G-protein coupled receptor protein signaling pathway	integral to plasma membrane
MAS1	1.014	0.032	1.072	0.013	1.057	-0.0209672	4142	NM_002377	Hs.99900	MAS1 oncogene	||MAS1||MAS1 oncogene||	4142	RefSeq	6	6	6q25.3	6q25.3-q26	+	160298384	160299519	angiotensin type II receptor activity	G-protein coupled receptor protein signaling pathway	integral to plasma membrane
MAS1L	0.968	0.08	1.108	0.008	1.145	0.781951	116511	NM_052967	Hs.533297	MAS1 oncogene-like	||MAS1L||MAS1 oncogene-like||MAS-RELATED GENE MRG||	116511	RefSeq	6	6	6p22.1	6p21	-	29562521	29563658	receptor activity	G-protein coupled receptor protein signaling pathway	integral to membrane
MASS1	1.022	0.063	1.205	0.007	1.179	1.09217	84059	NM_032119	Hs.153692	Monogenic, audiogenic seizure susceptibility 1 homolog (mouse)	||MASS1||VLGR1||KIAA0686||VERY LARGE G PROTEIN-COUPLED RECEPTOR 1||Monogenic, audiogenic seizure susceptibility 1 homolog (mouse)||MONOGENIC AUDIOGENIC SEIZURE SUSCEPTIBILITY 1, MOUSE, HOMOLOG OF||	84059	RefSeq	5	5	5q14.3	5q13	+	89890372	90495788	G-protein coupled receptor activity	cell communication	integral to membrane
MBC2	0.915	0.068	1.056	0.005	1.154	0.864068	23344	NM_015292	Hs.8309	Family with sequence similarity 62 (C2 domain containing), member A	||MBC2||FAM62A||family with sequence similarity 62 (C2 domain containing), member A||	23344	RefSeq	12	12	12q13.2	12q13.2	+	54808320	54824719
MC1R	0.803	0.033	0.995	0.004	1.238	1.63049	4157	NM_002386	Hs.513829	Melanocortin 1 receptor (alpha melanocyte stimulating hormone receptor)	||MSHR||MC1R||MELANOTROPIN RECEPTOR||MELANOCYTE-STIMULATING HORMONE RECEPTOR||Melanocortin 1 receptor (alpha melanocyte stimulating hormone receptor)||	4157	RefSeq	16	16	16q24.3	16q24.3	+	88512526	88514885	melanocyte stimulating hormone receptor activity	G-protein signaling, coupled to cyclic nucleotide second messenger	integral to plasma membrane
MC2R	0.88	0.053	1.015	0.031	1.153	0.854943	4158	NM_000529	Hs.248144	Melanocortin 2 receptor (adrenocorticotropic hormone)	||MC2R||ACTHR||ACTH RECEPTOR||CORTICOTROPIN RECEPTOR||MC2 RECEPTOR||Melanocortin 2 receptor (adrenocorticotropic hormone)||	4158	RefSeq	18	18	18p11.21	18p11.2	-	13874623	13875517	adrenocorticotropin receptor activity	G-protein signaling, coupled to cyclic nucleotide second messenger	integral to plasma membrane
MC3R	0.992	0.016	1.033	0.01	1.041	-0.166952	4159	NM_019888	Hs.248018	Melanocortin 3 receptor	||MC3R||MC3 RECEPTOR||Melanocortin 3 receptor||	4159	RefSeq	20	20	20q13.31	20q13.2-q13.3	+	54257195	54258278	melanocyte stimulating hormone receptor activity	G-protein signaling, coupled to IP3 second messenger (phospholipase C activating)	integral to plasma membrane
MC4R	0.802	0.003	0.977	0.021	1.218	1.44801	4160	NM_005912	Hs.532833	Melanocortin 4 receptor	||MC4R||MCR RECEPTOR||Melanocortin 4 receptor||	4160	RefSeq	18	18	18q21.32	18q22	-	56189563	56190562	melanocortin receptor activity	G-protein coupled receptor protein signaling pathway	integral to membrane
MC5R	0.832	0.016	0.897	0.011	1.078	0.170638	4161	NM_005913	Hs.248145	Melanocortin 5 receptor	||MC5R||MC5 RECEPTOR||Melanocortin 5 receptor||	4161	RefSeq	18	18	18p11.21	18p11.2	+	13815764	13816742	melanocyte stimulating hormone receptor activity	G-protein signaling, coupled to cyclic nucleotide second messenger	integral to plasma membrane
MGC24137	0.984	0.029	1.082	0.009	1.099	0.362244	143503	NM_152430	Hs.470038	Olfactory receptor, family 51, subfamily E, member 1	||OR51E1||olfactory receptor, family 51, subfamily E, member 1||	143503	RefSeq	11	11	11p15.4	11p15.4	+	4621731	4631383	olfactory receptor activity	G-protein coupled receptor protein signaling pathway	integral to membrane
MGC26856	0.774	0.003	0.893	0.001	1.153	0.854943	256710	NM_152779	Hs.553658	Hypothetical protein MGC26856	||MGC26856||hypothetical protein MGC26856||	256710	RefSeq	12	12	12q21.1	12q21.1	+	74014729	74050434			extracellular region
MGC40047	0.86	0.042	1	0.019	1.163	0.946184	284521	NM_175911	Hs.546529	Olfactory receptor, family 2, subfamily L, member 13	||OR2L13||olfactory receptor, family 2, subfamily L, member 13||	284521	RefSeq	1	1	1q44	1q44	+	244426533	244590264	olfactory receptor activity	G-protein coupled receptor protein signaling pathway	integral to membrane
MLN	0.931	0.024	1.091	0.011	1.171	1.01918	4295	NM_002418	Hs.2813	Motilin	||Motilin||MLN||	4295	RefSeq	6	6	6p21.31	6p21.3	-	33870426	33879771	hormone activity	G-protein coupled receptor protein signaling pathway	extracellular region
MRGPRF	0.986	0.012	1.062	0.04	1.077	0.161514	219928	NM_145015	Hs.118513	MAS-related GPR, member F	||MRGPRF||MAS-related GPR, member F||	219928	RefSeq	11	11	11q13.3	11q13.3	-	68528442	68537311	receptor activity	G-protein coupled receptor protein signaling pathway	integral to membrane
MRGX1	0.864	0.045	0.934	0.026	1.08	0.188886	259249	NM_147199	Hs.350565	G protein-coupled receptor MRGX1	||MRGX1||MRGPRX1||MAS-RELATED GENE MRGX1||G protein-coupled receptor MRGX1||MAS-related GPR, member X1||	259249	RefSeq	11	11	11p15.1	11p15.1	-	18911938	18912907	receptor activity	G-protein coupled receptor protein signaling pathway	integral to membrane
MRGX2	0.759	0.03	0.921	0.003	1.214	1.41151	117194	NM_054030	Hs.350566	G protein-coupled receptor MRGX2	||MRGX2||MRGPRX2||MAS-RELATED GENE MRGX2||G protein-coupled receptor MRGX2||MAS-related GPR, member X2||	117194	RefSeq	11	11	11p15.1	11p15.1	-	19032580	19038804	neuropeptide binding	G-protein coupled receptor protein signaling pathway	integral to membrane
MRGX3	0.908	0.019	0.996	0.015	1.096	0.334871	117195	NM_054031	Hs.380177	G protein-coupled receptor MRGX3	||MRGX3||MRGPRX3||MAS-RELATED GENE MRGX3||G protein-coupled receptor MRGX3||MAS-related GPR, member X3||	117195	RefSeq	11	11	11p15.1	11p15.1	+	18099077	18116601	receptor activity	G-protein coupled receptor protein signaling pathway	integral to membrane
MRGX4	0.919	0.012	1.095	0.008	1.19	1.19253	117196	NM_054032	Hs.356858	G protein-coupled receptor MRGX4	||MRGX4||MRGPRX4||MAS-RELATED GENE MRGX4||MAS-related GPR, member X4||G protein-coupled receptor MRGX4||	117196	RefSeq	11	11	11p15.1	11p15.1	+	18151379	18152348	receptor activity	G-protein coupled receptor protein signaling pathway	integral to membrane
MS4A2	0.519	0.007	0.781	0.042	1.504	4.05749	2206	NM_000139	Hs.386748	Membrane-spanning 4-domains, subfamily A, member 2 (Fc fragment of IgE, high affinity I, receptor for; beta polypeptide)	||FCERI||MS4A1||MS4A2||FCER1B||Fc-epsilon receptor I beta-chain||Fc IgE RECEPTOR, BETA CHAIN||Fc epsilon receptor I beta-chain||MEMBRANE-SPANNING 4 DOMAINS, SUBFAMILY A, MEMBER 2||immunoglobulin E receptor, high affinity, beta polypeptide||Fc FRAGMENT OF IgE, HIGH AFFINITY I, RECEPTOR FOR, BETA SUBUNIT||membrane-spanning 4-domains, subfamily A, member 2 (Fc fragment of IgE, high affinity I, recep…	2206	RefSeq	11	11	11q12.1	11q13	+	59612712	59622593	IgE binding	G-protein coupled receptor protein signaling pathway	integral to plasma membrane
MTNR1A	0.891	0.015	1.022	0.003	1.147	0.800199	4543	NM_005958	Hs.243467	Melatonin receptor 1A	||MTNR1A||melatonin receptor 1A||	4543	RefSeq	4	4	4q35.2	4q35.1	-	187829090	187851744	melatonin receptor activity	G-protein signaling, coupled to cyclic nucleotide second messenger	integral to plasma membrane
MTNR1B	0.965	0.012	1.092	0.01	1.131	0.654214	4544	NM_005959	Hs.147853	Melatonin receptor 1B	||MTNR1B||melatonin receptor 1B||	4544	RefSeq	11	11	11q21	11q21-q22	+	92342436	92355596	melatonin receptor activity	G-protein signaling, coupled to cyclic nucleotide second messenger	integral to plasma membrane
NMBR	0.798	0.018	0.919	0.016	1.152	0.845819	4829	NM_002511	Hs.533948	Neuromedin B receptor	||NMBR||neuromedin B receptor||	4829	RefSeq	6	6	6q24.1	6q21-qter	-	142438437	142451629	bombesin receptor activity	G-protein signaling, coupled to IP3 second messenger (phospholipase C activating)	integral to plasma membrane
NMUR2	0.555	0.008	0.782	0.025	1.409	3.19071	56923	NM_020167	Hs.283093	Neuromedin U receptor 2	||FM4||NMU2R||NMUR2||neuromedin U receptor 2||GROWTH HORMONE SECRETAGOGUE RECEPTOR FAMILY, MEMBER 4||	56923	RefSeq	5	5	5q33.1	5q33.1	-	151751302	151765017	GTP binding	arachidonic acid secretion	integral to membrane
NPR1	0.832	0.025	0.937	0.017	1.126	0.608594	4881	NM_000906	Hs.490330	Natriuretic peptide receptor A/guanylate cyclase A (atrionatriuretic peptide receptor A)	||NPR1||GUC2A||ANPRA||ATRIONATRIURETIC PEPTIDE RECEPTOR, TYPE A||ATRIAL NATRIURETIC PEPTIDE RECEPTOR, TYPE A||natriuretic peptide receptor A/guanylate cyclase A (atrionatriuretic peptide receptor A)||	4881	RefSeq	1	1	1q21.3	1q21-q22	+	150464185	150479536	ATP binding	cGMP biosynthesis	integral to plasma membrane
NPR2	1.003	0.006	1.101	0.017	1.097	0.343996	4882	NM_000907	Hs.78518	Natriuretic peptide receptor B/guanylate cyclase B (atrionatriuretic peptide receptor B)	||NPR2||ANPRB||ATRIONATRIURETIC PEPTIDE RECEPTOR, TYPE B||ATRIAL NATRIURETIC PEPTIDE RECEPTOR, TYPE B||natriuretic peptide receptor B/guanylate cyclase B (atrionatriuretic peptide receptor B)||	4882	RefSeq	9	9	9p13.3	9p21-p12	+	35782405	35799709	ATP binding	cGMP biosynthesis	integral to membrane
NPR3	0.752	0.024	0.878	0.008	1.167	0.98268	4883	NM_000908	Hs.237028	Natriuretic peptide receptor C/guanylate cyclase C (atrionatriuretic peptide receptor C)	||NPR3||ANPRC||ATRIONATRIURETIC PEPTIDE RECEPTOR, TYPE C||ATRIAL NATRIURETIC PEPTIDE CLEARANCE RECEPTOR||natriuretic peptide receptor C/guanylate cyclase C (atrionatriuretic peptide receptor C)||	4883	RefSeq	5	5	5p13.3	5p14-p13	+	32747421	32823009	peptide receptor activity, G-protein coupled	skeletal development	integral to membrane
NPY	0.92	0.008	1.034	0.013	1.123	0.581221	4852	NM_000905	Hs.1832	Neuropeptide Y	||NPY||neuropeptide Y||Y NEUROPEPTIDE||	4852	RefSeq	7	7	7p15.3	7p15.1	+	24097048	24104717	G-protein coupled receptor activity	G-protein signaling, coupled to cyclic nucleotide second messenger	cell
NPY1R	0.952	0.013	1.12	0.021	1.176	1.0648	4886	NM_000909	Hs.519057	Neuropeptide Y receptor Y1	||NPY1R||NPYR||neuropeptide Y receptor Y1||	4886	RefSeq	4	4	4q32.2	4q31.3-q32	-	164602721	164611353	neuropeptide Y receptor activity	G-protein signaling, adenylate cyclase inhibiting pathway	integral to plasma membrane
NPY2R	0.985	0.006	1.056	0.011	1.071	0.10677	4887	NM_000910	Hs.37125	Neuropeptide Y receptor Y2	||NPY2R||neuropeptide Y receptor Y2||	4887	RefSeq	4	4	4q32.1	4q31	+	156487385	156495832	calcium channel regulator activity	G-protein coupled receptor protein signaling pathway	integral to plasma membrane
NPY5R	0.825	0.065	0.963	0.024	1.166	0.973556	4889	NM_006174	Hs.519058	Neuropeptide Y receptor Y5	||NPY5R||neuropeptide Y receptor Y5||	4889	RefSeq	4	4	4q32.2	4q31-q32	+	164622695	164630689	neuropeptide Y receptor activity	G-protein coupled receptor protein signaling pathway	integral to plasma membrane
NTSR1	0.879	0.007	0.947	0.019	1.077	0.161514	4923	NM_002531	Hs.110642	Neurotensin receptor 1 (high affinity)	||NTSR1||Neurotensin receptor 1 (high affinity)||	4923	RefSeq	20	20	20q13.33	20q13-20q13	+	60810633	60864567	catalytic activity	G-protein coupled receptor protein signaling pathway	Golgi apparatus
NTSR2	0.738	0.005	0.91	0.008	1.232	1.57574	23620	NM_012344	Hs.131138	Neurotensin receptor 2	||NTSR2||Neurotensin receptor 2||	23620	RefSeq	2	2	2p25.1	2p25.1	-	11748902	11761023	neurotensin receptor activity, G-protein coupled	G-protein coupled receptor protein signaling pathway	integral to plasma membrane
OPN1LW	0.84	0.005	1.004	0.001	1.195	1.23815	5956	NM_020061	Hs.528663	Opsin 1 (cone pigments), long-wave-sensitive (color blindness, protan)	||CBP||OPN1LW||PROTANOPIA||RCP||RED CONE PIGMENT||RED COLORBLINDNESS OPSIN1, LONG-WAVE-SENSITIVE||COLORBLINDNESS, PARTIAL, PROTAN SERIES||Opsin 1 (cone pigments), long-wave-sensitive (color blindness, protan)||	5956	RefSeq	X	X	Xq28	Xq28	+	152930604	152945248	photoreceptor activity	G-protein coupled receptor protein signaling pathway	integral to plasma membrane
[truncated: 19,870 more rows]

## Sheet: Z-score<-2
mean carrier	SD carrier	mean DTIC	SD DTIC	Ratio DTIC/carrier	Z-Score	Gene Symbol	Locus ID	Accession	Unigene	Gene Name	Aliases	LocusLink	Type	Chromosome (from UCSC)	Chromosome (from SOURCE)	Map (UCSC)	Map (SOURCE)	Strand	Start	End	GO: Molecular Function	GO: Biological Process	GO: Cellular Component
[truncated: 139 more rows]
